# Supplementary material for: Chemodivergence in Pd-catalyzed desymmetrization of allenes: enantioselective [4+3] cycloaddition, desymmetric allenylic substitution and enynylation
Source: Royal Society of Chemistry journal article supplement (doi:10.1039/d3sc04581a), 2023-01-01
Supplement: d3sc04581a1.pdf [file d3sc04581a1.pdf]

## Supporting Information

### **Chemodivergence in Pd-Catalyzed Desymmetrization of Allenes: Enantioselective [4+3] Cycloaddition, Desymmetric Allenylic Substitution and Enynylation**

Pengfei Luo,<sup>[a]</sup> Long Li,<sup>[a]</sup> Xinfang Mao, Zheng Sun, Yingcheng Wang, Fangzhi Peng,  
and Zhihui Shao\*

Key Laboratory of Medicinal Chemistry for Natural Resource, Ministry of Education,  
School of Chemical Science and Technology, Yunnan Provincial Center for Research &  
Development of Natural Products, and State Key Laboratory for Conservation and  
Utilization of Bio-Resources in Yunnan, Yunnan University, Kunming 650091, China

[a] These authors contributed equally.

E-mail: zhihui\_shao@hotmail.com

## Table of Contents

|                                               |     |
|-----------------------------------------------|-----|
| 1. General information .....                  | 1   |
| 2. Substrate synthesis .....                  | 1   |
| 3. Optimization of reaction conditions.....   | 5   |
| 4. General condition.....                     | 13  |
| 5. Transformations of the products .....      | 15  |
| 6. Procedures of control experiments.....     | 17  |
| 7. Single crystal X-ray diffraction data..... | 23  |
| 8. References .....                           | 27  |
| 9. Spectral data of products.....             | 28  |
| 10. NMR spectra .....                         | 57  |
| 11. HPLC spectra .....                        | 128 |

## 1. General information

Unless otherwise noted, all reactions in standard conditions were carried out under an argon atmosphere. Solvents were dried by standard methods under argon atmosphere.  $^1\text{H}$  NMR,  $^{13}\text{C}$  NMR and  $^{19}\text{F}$  NMR spectra were recorded on 400 MHz, 500 MHz, 600 MHz instruments using  $\text{CDCl}_3$  or  $\text{CD}_3\text{OD}$  as solvent. Chemical shifts of  $^1\text{H}$  NMR were recorded in parts per million (ppm,  $\delta$  (ppm)) relative to tetramethylsilane ( $\delta$  (ppm) = 0.00 ppm) with the solvent resonance as an internal standard ( $\text{CDCl}_3$ :  $\delta$  (ppm) = 7.26 ppm,  $\text{CD}_3\text{OD}$ :  $\delta$  (ppm) = 3.31 ppm). NMR multiplicities are abbreviated as follows: s = singlet, d = doublet, t = triplet, m = multiple. High-resolution mass spectral analysis (HRMS) data were measured on a spectrometer by means of the ESI technique. The enantiomeric excess was determined by chiral HPLC with *n*-hexane and *i*-propanol as eluents. Optical rotations were measured on a polarimeter. Column chromatography was performed on silica gel (200–300 mesh).

## 2. Substrate synthesis

### Synthesis of allenylic dicarbonates

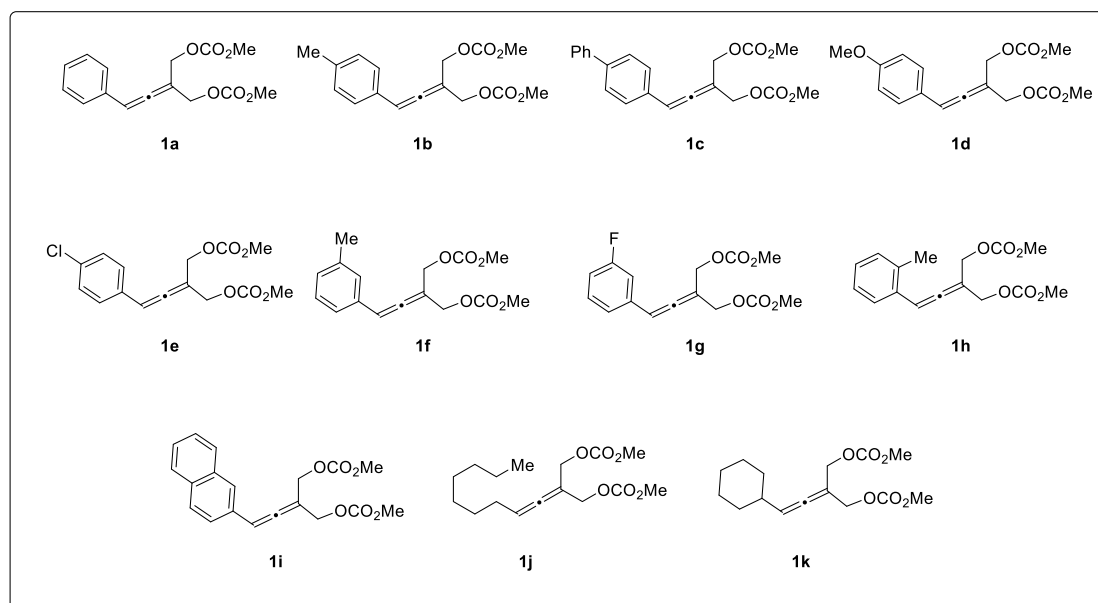

The substrates of **1a-1k** were synthesized according to modified procedure from Jan Deska and Ma et al.<sup>[1,2]</sup>

## Procedure for synthesizing 1a-1i

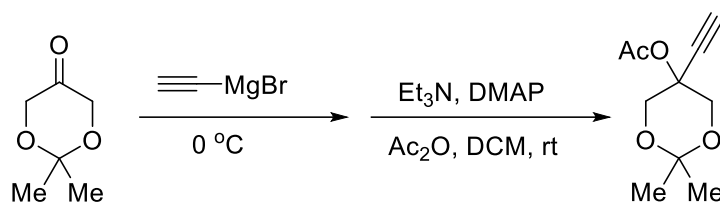

To an ice-cold solution of ethynylmagnesium bromide (0.5 M in THF, 250 mL, 125 mmol) a solution of 2,2-dimethyl-1,3-dioxan-5-one (13.0 g, 100 mmol, in 100 mL dry THF) was added dropwise at 0 °C over a period of one hour. After complete addition, the reaction mixture was carefully hydrolyzed with saturated aqueous  $\text{NH}_4\text{Cl}$  and ethyl acetate (200 mL) was added. The aqueous layer was extracted with ethyl acetate, the combined organic layers washed with sat.  $\text{NaCl}$  and dried over  $\text{Na}_2\text{SO}_4$ . After removal of the solvent in vacuo, the crude alcohol was dissolved in  $\text{CH}_2\text{Cl}_2$  (10 mL), and triethylamine (16.7 mL, 120 mmol), DMAP (1.2 g, 10.0 mmol) and acetic anhydride (20 mL, 212 mmol) were added and the reaction mixture was stirred at rt overnight. After removal of triethylamine and excess acetic anhydride in vacuo, the residue was dissolved in ethyl acetate (200 mL), washed with 0.5 N  $\text{HCl}$ , saturated  $\text{NaHCO}_3$  and brine and the organic layer was dried over  $\text{Na}_2\text{SO}_4$ . After concentration in vacuo, the crude acetate was purified by column chromatography ( $\text{SiO}_2$ , cyclohexane/ethyl acetate = 80:20) yielding as pale white solid (82% yield).

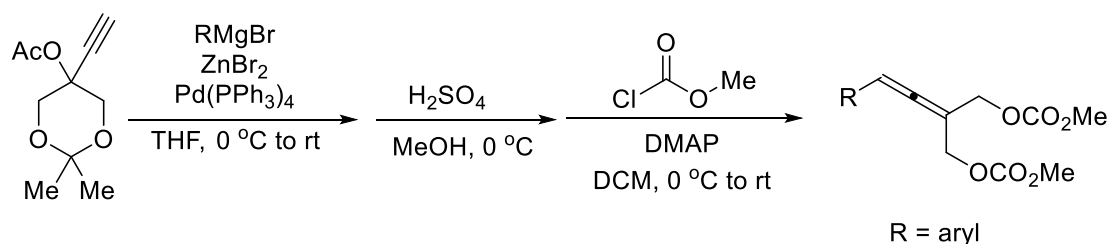

$\text{ZnBr}_2$  (2.44 g, 4.4 mmol) was carefully dried with a heatgun in vacuo until a fine powder formed. After cooling to rt, under Ar-atmosphere,  $\text{Pd}(\text{PPh}_3)_4$  (20 mg, 0.06 mmol) was added, catalyst and zinc salt were dissolved in dry THF (15 mL) and cooled to 0 °C. A solution of the corresponding Grignard reagent (4 mmol, 0.5-1M in THF) was added dropwise and stirring at 0 °C was continued for 20 min where upon a white precipitate formed. In a second flask, 5-acetoxy-2,2-dimethyl-5-ethynyl-1,3-dioxane (396 mg, 2.0 mmol) was dissolved in dry THF (4 mL) and added to the solution of the

organozinc reagent at 0 °C. The reaction mixture was allowed to warm to rt overnight. After addition of saturated NH<sub>4</sub>Cl (10 mL) and ethyl acetate (20 mL), the aqueous phase was extracted with ethyl acetate (20 mL) and the combined organic layers were dried over Na<sub>2</sub>SO<sub>4</sub> and filtered through a small plug of silica. The solvents were removed in vacuo, the residue redissolved in methanol (10 mL) and cooled to 0 °C. A drop of conc. sulfuric acid was added and the reaction mixture was stirred for approx. 30 min at 0 °C (TLC-control). Saturated NaHCO<sub>3</sub> (5 mL) and ethyl acetate (30 mL) were added, the aqueous layer was extracted with ethyl acetate (2 x 10 mL) and the combined organic layers were dried over Na<sub>2</sub>SO<sub>4</sub>. After removal of the solvents in vacuo, column chromatography (SiO<sub>2</sub>, cyclohexane/ethyl acetate = 70:30 to 40:60) delivered the pure allendiols (72-95% yield). To a three-neck flask were added allendiols (1.64 mmol) prepared above, CH<sub>2</sub>Cl<sub>2</sub> (30 mL), and DMAP (251.3 mg, 2.06 mmol) sequentially. The resulting mixture was stirred at 0 °C for 10 min followed by the dropwise addition of a solution of methyl chloroformate (0.32 mL, 4.1 mmol) in CH<sub>2</sub>Cl<sub>2</sub> (5 mL) within 10 min at 0 °C. The resulting mixture was stirred at this temperature for 10 min, removed from the cooling bath, allowed to warm up to rt gradually, and continued to react at rt. After 6.0 h, the reaction was complete as monitored by TLC and quenched with H<sub>2</sub>O (30 mL). The organic layer was separated, washed with an aqueous solution of hydrochloric acid (1M, 2 x 30 mL) and brine (30 mL) sequentially, and dried over anhydrous Na<sub>2</sub>SO<sub>4</sub>. After filtration, evaporation of the solvent and chromatography on silica gel (eluent: petroleum ether/ethyl acetate = 20:1) afforded allenylic dicarbonates **1a-1i** (76-92% yield).

### Procedure for synthesizing **1g**, **1k**

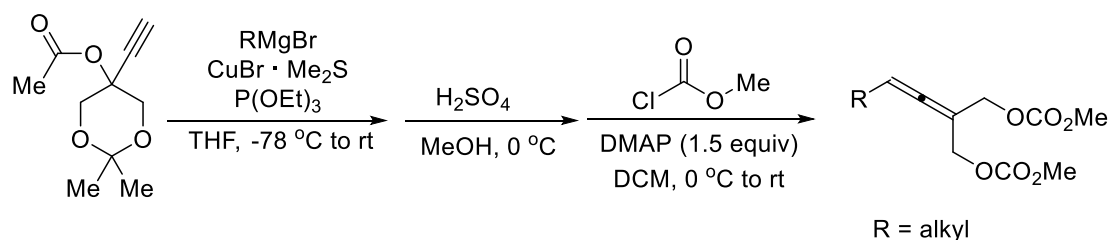

In an oven-dried Schlenk-flask under Ar-atmosphere, CuBr•Me<sub>2</sub>S (41 mg, 0.2 mmol) was dissolved in dry THF (10 mL). Triethylphosphite (67 mg, 0.4 mmol) was added at rt whereupon the solid copper salt slowly dissolved. After addition of 5-acetoxy-2,2-dimethyl-5-ethynyl-1,3-dioxane (396 mg, 2.0 mmol) the solution was

cooled to  $-78\text{ }^{\circ}\text{C}$  and a solution of the corresponding Grignard-reagent (4 mmol, 0.5-1M in THF) was added dropwise over a period of 2 hours. The reaction mixture was allowed to warm up to rt overnight. After addition of saturated  $\text{NH}_4\text{Cl}$  (10 mL) and ethyl acetate (20 mL), the aqueous phase was extracted with ethyl acetate (20 mL) and the combined organic layers were dried over  $\text{Na}_2\text{SO}_4$  and filtered through a small plug of silica. The solvents were removed in vacuo, the residue redissolved in methanol (10 mL) and cooled to  $0\text{ }^{\circ}\text{C}$ . A drop of conc. sulfuric acid was added and the reaction mixture was stirred for approx. 30 min at  $0\text{ }^{\circ}\text{C}$  (TLC-control). Saturated  $\text{NaHCO}_3$  (5 mL) and ethyl acetate (30 mL) were added, the aqueous layer was extracted with ethyl acetate (2 x 10 mL) and the combined organic layers were dried over  $\text{Na}_2\text{SO}_4$ . After removal of the solvents in vacuo, column chromatography ( $\text{SiO}_2$ , cyclohexane/ethyl acetate 7/3 to 4/6) delivered the pure allendiols (57-71% yield). To a three-neck flask were added allendiols (1.64 mmol) prepared above,  $\text{CH}_2\text{Cl}_2$  (30 mL), and DMAP (251.3 mg, 2.06 mmol) sequentially. The resulting mixture was stirred at  $0\text{ }^{\circ}\text{C}$  for 10 min followed by the dropwise addition of a solution of methyl chloroformate (0.32 mL, 4.1 mmol) in  $\text{CH}_2\text{Cl}_2$  (5 mL) within 10 min at  $0\text{ }^{\circ}\text{C}$ . The resulting mixture was stirred at this temperature for 10 min, removed from the cooling bath, allowed to warm up to rt gradually, and continued to react at rt. After 6 h, the reaction was complete as monitored by TLC and quenched with  $\text{H}_2\text{O}$  (30 mL). The organic layer was separated, washed with an aqueous solution of hydrochloric acid (1M,  $2 \times 30\text{ mL}$ ) and brine (30 mL) sequentially, and dried over anhydrous  $\text{Na}_2\text{SO}_4$ . After filtration, evaporation of the solvent and chromatography on silica gel (eluent: petroleum ether/ethyl acetate = 30:1) afforded allenylic dicarbonates **1g**、**1k** (81-87% yield).

### 3. Optimization of reaction conditions

#### Optimization of reaction conditions of allenyl dicarbonate 1a with 2

Table S1: Chiral ligand catalyst screening<sup>a</sup>

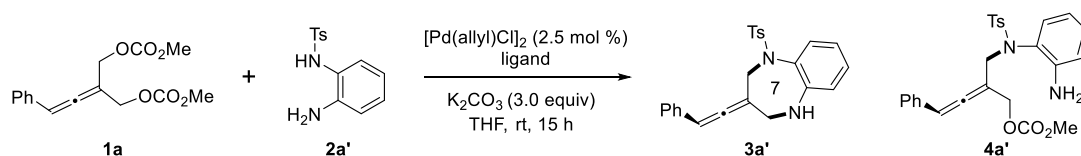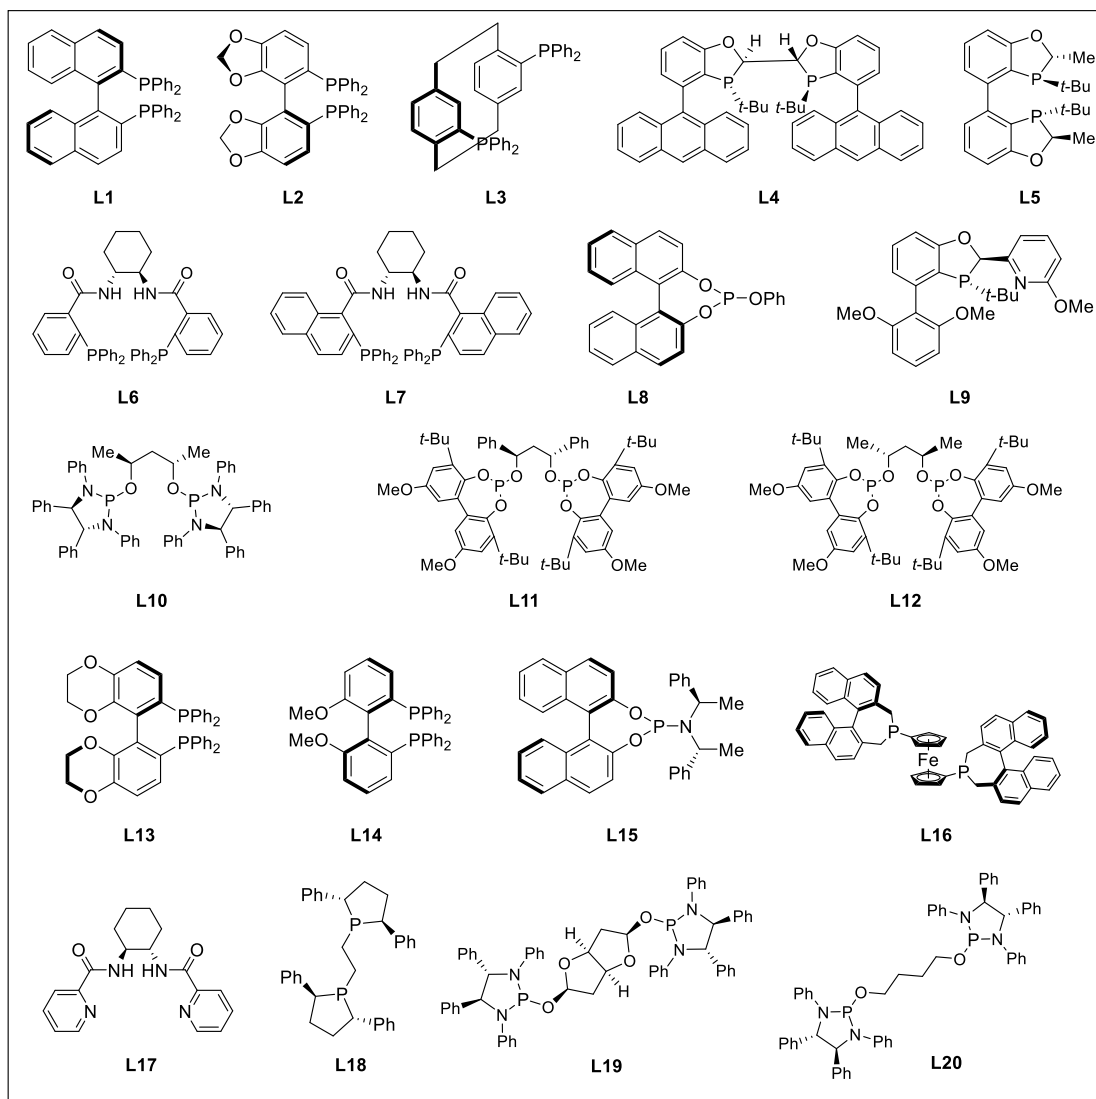

| entry | ligand    | <b>3a'</b>             |                     | <b>4a'</b>             |                     |
|-------|-----------|------------------------|---------------------|------------------------|---------------------|
|       |           | yield (%) <sup>b</sup> | ee (%) <sup>c</sup> | yield (%) <sup>b</sup> | ee (%) <sup>c</sup> |
| 1     | <b>L1</b> | 0                      | -                   | 0                      | -                   |
| 2     | <b>L2</b> | 0                      | -                   | 0                      | -                   |
| 3     | <b>L3</b> | 0                      | -                   | 0                      | -                   |
| 4     | <b>L4</b> | 0                      | -                   | 0                      | -                   |
| 5     | <b>L5</b> | 67                     | 0                   | 0                      | -                   |

|                 |            |    |     |       |    |
|-----------------|------------|----|-----|-------|----|
| 6               | <b>L6</b>  | 0  | -   | trace | -  |
| 7               | <b>L7</b>  | 0  | -   | 24    | 45 |
| 8               | <b>L8</b>  | 0  | -   | 0     | -  |
| 9               | <b>L9</b>  | 0  | -   | 0     | -  |
| 10              | <b>L10</b> | 75 | -55 | 0     | -  |
| 11              | <b>L11</b> | 71 | -69 | 0     | -  |
| 12              | <b>L12</b> | 70 | 73  | 0     | -  |
| 13              | <b>L13</b> | 0  | -   | 0     | -  |
| 14              | <b>L14</b> | 0  | -   | 0     | -  |
| 15              | <b>L15</b> | 0  | -   | 0     | -  |
| 16              | <b>L16</b> | 0  | -   | 0     | -  |
| 17 <sup>d</sup> | <b>L17</b> | 0  | -   | 0     | -  |
| 18              | <b>L18</b> | 0  | -   | 0     | -  |
| 19              | <b>L19</b> | 0  | -   | 0     | -  |
| 20              | <b>L20</b> | 0  | -   | 0     | -  |

<sup>a</sup>Reaction conditions: **1a** (0.1 mmol), **2a'** (0.13 mmol), [Pd(allyl)Cl]<sub>2</sub> (2.5 mol %), ligand (monophosphines 11.0 mol %, diphosphines 5.5 mol %), K<sub>2</sub>CO<sub>3</sub> (3.0 equiv) and THF (0.8 mL).

<sup>b</sup>Yield of isolated product. <sup>c</sup>Determined by chiral HPLC analysis. <sup>d</sup>**L17** (5.5 mol %) was used. Ts = 4-Methylbenzenesulfonyl.

**Table S2: Base screening<sup>a</sup>**

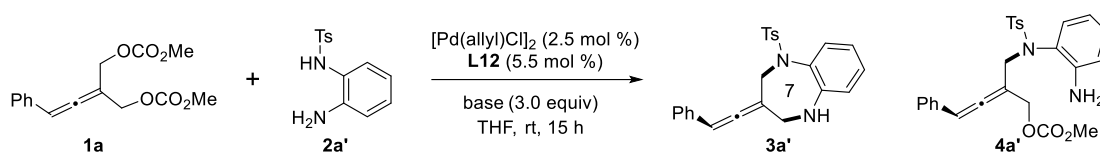

| entry | base                            | <b>3a'</b>             |                     | <b>4a'</b>             |                     |
|-------|---------------------------------|------------------------|---------------------|------------------------|---------------------|
|       |                                 | yield (%) <sup>b</sup> | ee (%) <sup>c</sup> | yield (%) <sup>b</sup> | ee (%) <sup>c</sup> |
| 1     | Li <sub>2</sub> CO <sub>3</sub> | 47                     | 84                  | 0                      | -                   |
| 2     | Na <sub>2</sub> CO <sub>3</sub> | 54                     | 87                  | 0                      | -                   |
| 3     | K <sub>2</sub> CO <sub>3</sub>  | 70                     | 73                  | 0                      | -                   |
| 4     | K <sub>3</sub> PO <sub>4</sub>  | 47                     | 73                  | 0                      | -                   |

<sup>a</sup>Reaction conditions: **1a** (0.1 mmol), **2a'** (0.13 mmol), [Pd(allyl)Cl]<sub>2</sub> (2.5 mol %), **L12** (5.5 mol %), base (3.0 equiv) and THF (0.8 mL). <sup>b</sup>Yield of isolated product. <sup>c</sup>Determined by chiral HPLC analysis.

**Table S3: Protective group and base screening<sup>a</sup>**
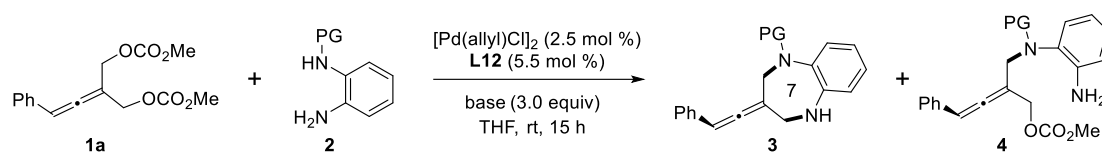

| entry | PG  | base                            | 3                      |                     | 4                      |                     |
|-------|-----|---------------------------------|------------------------|---------------------|------------------------|---------------------|
|       |     |                                 | yield (%) <sup>b</sup> | ee (%) <sup>c</sup> | yield (%) <sup>b</sup> | ee (%) <sup>c</sup> |
| 1     | Ns  | Na <sub>2</sub> CO <sub>3</sub> | 72                     | 86                  | 0                      | -                   |
| 2     | Ns  | K <sub>2</sub> CO <sub>3</sub>  | 93                     | 85                  | 0                      | -                   |
| 3     | Mts | Li <sub>2</sub> CO <sub>3</sub> | 82                     | 90                  | 0                      | -                   |
| 4     | Mts | Na <sub>2</sub> CO <sub>3</sub> | 81                     | 95                  | 0                      | -                   |
| 5     | Mts | K <sub>2</sub> CO <sub>3</sub>  | 91                     | 85                  | 0                      | -                   |

<sup>a</sup>Reaction conditions: **1a** (0.1 mmol), **2** (0.13 mmol), [Pd(allyl)Cl]<sub>2</sub> (2.5 mol %), **L12** (5.5 mol %), base (3.0 equiv) and THF (0.8 mL). <sup>b</sup>Yield of isolated product. <sup>c</sup>Determined by chiral HPLC analysis. Ns = 4-Nitrobenzenesulfonyl, Mts = 2,4,6-Trimethylbenzenesulfonyl. PG = Protective Group.

**Table S4: Solvents screening<sup>a</sup>**
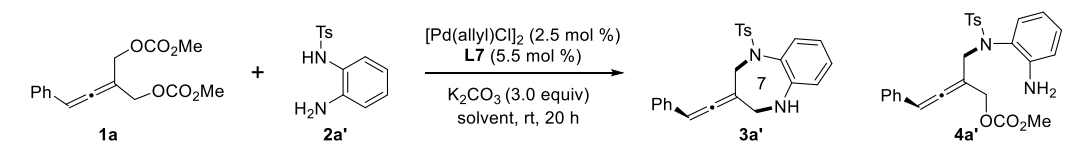

| entry          | solvent          | 3a'                    |                     | 4a'                    |                     |
|----------------|------------------|------------------------|---------------------|------------------------|---------------------|
|                |                  | yield (%) <sup>b</sup> | ee (%) <sup>c</sup> | yield (%) <sup>b</sup> | ee (%) <sup>c</sup> |
| 1              | MeCN             | 0                      | -                   | trace                  | -                   |
| 2              | PhMe             | 0                      | -                   | 42                     | 66                  |
| 3 <sup>d</sup> | PhMe             | 0                      | -                   | 61                     | 60                  |
| 4              | EtOAc            | 0                      | -                   | trace                  | -                   |
| 5              | MeOH             | 0                      | -                   | 0                      | -                   |
| 6              | <i>n</i> -hexane | 0                      | -                   | 0                      | -                   |
| 7              | DCM              | 0                      | -                   | 79                     | 40                  |
| 8              | DCE              | 0                      | -                   | 74                     | 37                  |

<sup>a</sup>Reaction conditions: **1a** (0.1 mmol), **2a'** (0.13 mmol), [Pd(allyl)Cl]<sub>2</sub> (2.5 mol %), **L7** (5.5 mol %), K<sub>2</sub>CO<sub>3</sub> (3.0 equiv) and solvent (1.0 mL). <sup>b</sup>Yield of isolated product. <sup>c</sup>Determined by chiral HPLC analysis. <sup>d</sup>50 °C instead of rt.

**Table S5: Screening of temperature and solvents<sup>a</sup>**

| entry | T (°C) | solvent          | <b>3a</b>              |                     | <b>4a</b>              |                     |
|-------|--------|------------------|------------------------|---------------------|------------------------|---------------------|
|       |        |                  | yield (%) <sup>b</sup> | ee (%) <sup>c</sup> | yield (%) <sup>b</sup> | ee (%) <sup>c</sup> |
| 1     | 50     | PhMe             | 0                      | -                   | 74                     | 83                  |
| 2     | 50     | <i>o</i> -Xylene | 0                      | -                   | 71                     | 87                  |
| 3     | 50     | <i>m</i> -Xylene | 0                      | -                   | 76                     | 86                  |
| 4     | 50     | <i>p</i> -Xylene | 0                      | -                   | 74                     | 86                  |
| 5     | 50     | TMB              | 0                      | -                   | 83                     | 88                  |
| 6     | 46     | TMB              | 0                      | -                   | 75                     | 90                  |
| 7     | 40     | TMB              | 0                      | -                   | 52                     | 93                  |

<sup>a</sup>Reaction conditions: **1a** (0.1 mmol), **2a** (0.13 mmol), [Pd(allyl)Cl]<sub>2</sub> (2.5 mol %), **L7** (5.5 mol %), K<sub>2</sub>CO<sub>3</sub> (3.0 equiv) and solvent (1.0 mL). <sup>b</sup>Yield of isolated product. <sup>c</sup>Determined by chiral HPLC analysis. TMB = 1, 3, 5-Trimethylbenzene. T = Temperature.

**Table S6: Variable-temperature  $^1\text{H}$  NMR experiments of product 4a (33 °C to -3.5 °C)**

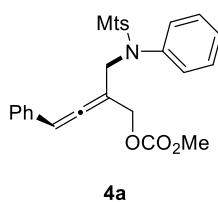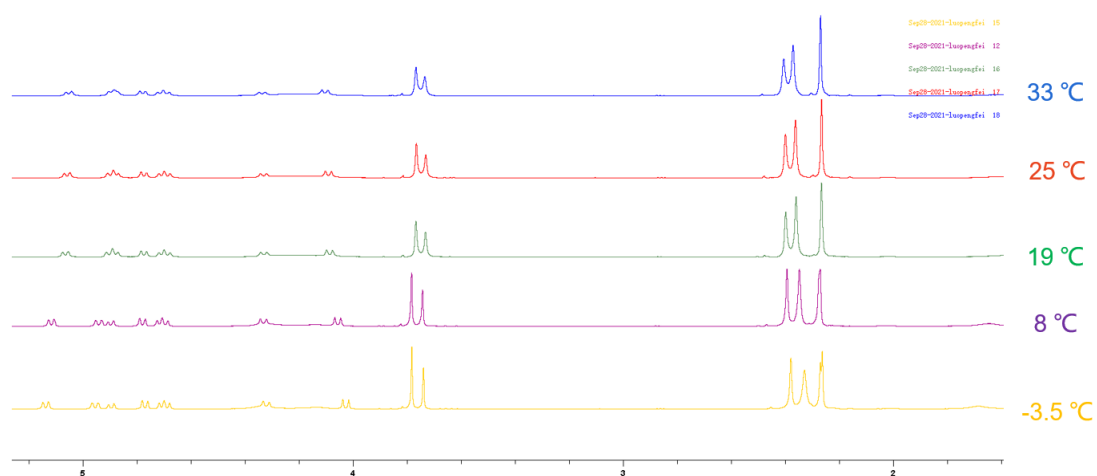

The high-temperature NMR experiments for the standard product **3a** were performed at 33 °C, which is cleaner than the corresponding spectra at -3.5 °C. For instance, the two peaks of the  $\text{CH}_3$  group (at ~2.27 ppm) in  $^1\text{H}$  NMR at -3.5 °C merged into one peak at high temperature.<sup>[3]</sup>

## Optimization of reaction conditions of allenyl decarbonate **1a** with **8**

### Optimal conditions for the use of *o*-phenylenediamine and allenyl dicarbonate<sup>a</sup>

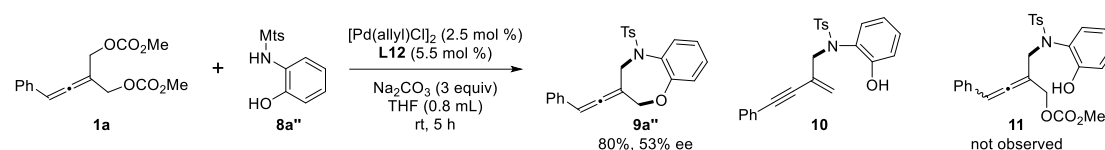

<sup>a</sup>Reaction conditions: **1a** (0.1 mmol), **8a''** (0.13 mmol),  $[\text{Pd}(\text{allyl})\text{Cl}]_2$  (2.5 mol %), **L12** (5.5 mol %),  $\text{Na}_2\text{CO}_3$  (3.0 equiv) and THF (0.8 mL). isolated yields, the ee values were determined by chiral HPLC.

**Table S7: Chiral ligand catalyst screening<sup>a</sup>**

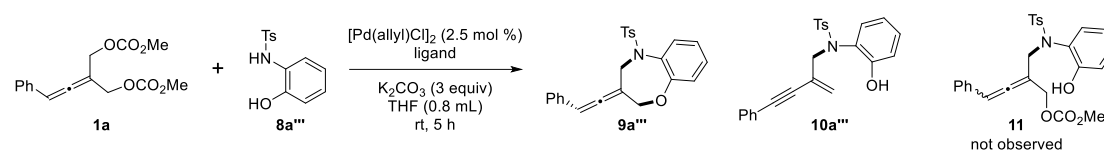

| entry | ligand     | <b>9a'''</b>           |                     | <b>10a'''</b>          |
|-------|------------|------------------------|---------------------|------------------------|
|       |            | yield (%) <sup>b</sup> | ee (%) <sup>c</sup> | yield (%) <sup>b</sup> |
| 1     | <b>L1</b>  | 70                     | 0                   | 0                      |
| 2     | <b>L2</b>  | 71                     | 0                   | 0                      |
| 3     | <b>L3</b>  | 75                     | 0                   | 0                      |
| 4     | <b>L4</b>  | <10                    | 67                  | 0                      |
| 5     | <b>L5</b>  | 27                     | 0                   | 0                      |
| 6     | <b>L6</b>  | trace                  | -                   | 0                      |
| 7     | <b>L7</b>  | trace                  | -                   | 0                      |
| 8     | <b>L8</b>  | trace                  | -                   | 0                      |
| 9     | <b>L9</b>  | <10                    | -                   | <10                    |
| 10    | <b>L10</b> | 82                     | 44                  | 0                      |
| 11    | <b>L11</b> | 80                     | 66                  | 0                      |
| 12    | <b>L12</b> | 84                     | -53                 | 0                      |
| 13    | <b>L13</b> | 71                     | 0                   | 0                      |
| 14    | <b>L14</b> | 0                      | -                   | 0                      |
| 15    | <b>L15</b> | 83                     | 0                   | 0                      |
| 16    | <b>L16</b> | 68                     | 0                   | 0                      |
| 17    | <b>L17</b> | 0                      | -                   | 0                      |
| 18    | <b>L18</b> | 0                      | -                   | 0                      |
| 19    | <b>L19</b> | 81                     | 3                   | 0                      |
| 20    | <b>L20</b> | 83                     | 40                  | 0                      |

<sup>a</sup>Reaction conditions: **1a** (0.1 mmol), **8a'''** (0.13 mmol),  $[\text{Pd}(\text{allyl})\text{Cl}]_2$  (2.5 mol %), ligand (monophosphines 11.0 mol %, diphosphines 5.5 mol %),  $\text{K}_2\text{CO}_3$  (3.0 equiv) and THF (0.8 mL).

<sup>b</sup>Yield of isolated product. <sup>c</sup>Determined by chiral HPLC analysis.

**Table S8: Base screening<sup>a</sup>**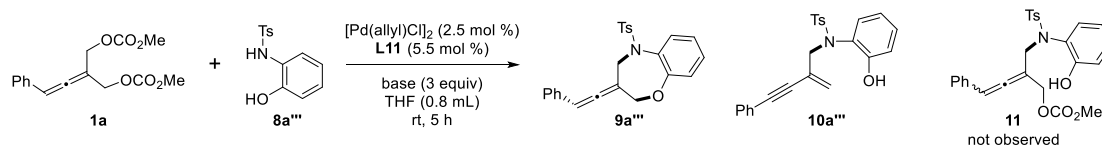

| entry | base                            | 9a'''                  |                     | 10a'''                 |
|-------|---------------------------------|------------------------|---------------------|------------------------|
|       |                                 | yield (%) <sup>b</sup> | ee (%) <sup>c</sup> | yield (%) <sup>b</sup> |
| 1     | -                               | 0                      | -                   | 0                      |
| 2     | Li <sub>2</sub> CO <sub>3</sub> | 80                     | 70                  | 0                      |
| 3     | Na <sub>2</sub> CO <sub>3</sub> | 85                     | 71                  | 0                      |
| 4     | K <sub>2</sub> CO <sub>3</sub>  | 81                     | 66                  | 0                      |
| 5     | Ru <sub>2</sub> CO <sub>3</sub> | 84                     | 47                  | 0                      |
| 6     | Cs <sub>2</sub> CO <sub>3</sub> | 86                     | 53                  | 0                      |

<sup>a</sup>Reaction conditions: **1a** (0.1 mmol), **8a'''** (0.13 mmol), [Pd(allyl)Cl]<sub>2</sub> (2.5 mol %), **L11** (5.5 mol %), base (3.0 equiv) and THF (0.8 mL). <sup>b</sup>Yield of isolated product. <sup>c</sup>Determined by chiral HPLC analysis.

**Table S9: Protective group screening<sup>a</sup>**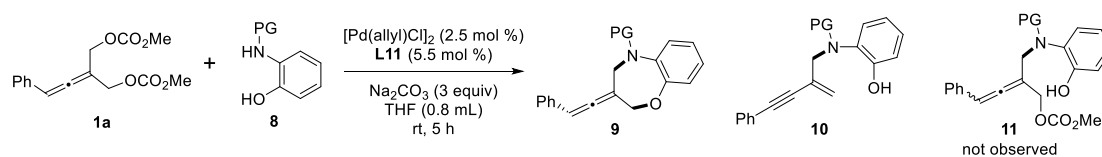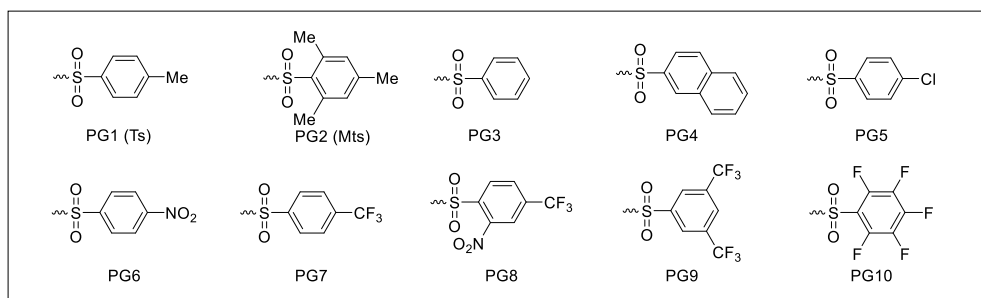

| entry | PG   | yield of <b>9</b> (%) <sup>b</sup> | ee of <b>9</b> (%) <sup>c</sup> | yield of <b>10</b> (%) <sup>b</sup> |
|-------|------|------------------------------------|---------------------------------|-------------------------------------|
| 1     | PG1  | 85                                 | 71                              | 0                                   |
| 2     | PG2  | 82                                 | 58                              | 0                                   |
| 3     | PG3  | 82                                 | 73                              | 0                                   |
| 4     | PG4  | 87                                 | 76                              | 0                                   |
| 5     | PG5  | 86                                 | 75                              | 0                                   |
| 6     | PG6  | 91                                 | 75                              | 0                                   |
| 7     | PG7  | 87                                 | 80                              | 0                                   |
| 8     | PG8  | 82                                 | 86                              | 0                                   |
| 9     | PG9  | 94                                 | 88                              | 0                                   |
| 10    | PG10 | 84                                 | 85                              | 0                                   |

<sup>a</sup>Reaction conditions: **1a** (0.1 mmol), **8** (0.13 mmol), [Pd(allyl)Cl]<sub>2</sub> (2.5 mol %), **L11** (5.5 mol %), Na<sub>2</sub>CO<sub>3</sub> (3.0 equiv) and THF (0.8 mL). <sup>b</sup>Yield of isolated product. <sup>c</sup>Determined by chiral HPLC analysis.

**Table S10: Screening of reactant ratio<sup>a</sup>**

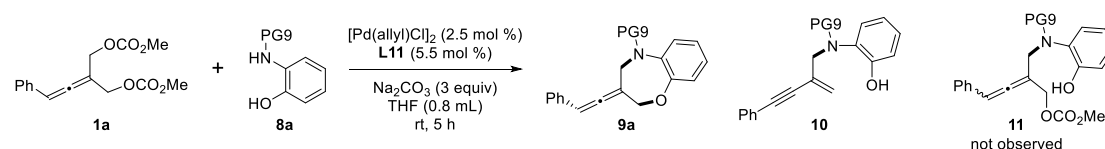

| entry | <b>1a/8a</b> (mmol) | yield of <b>9a</b> (%) <sup>b</sup> | ee of <b>9a</b> (%) <sup>c</sup> | yield of <b>10</b> (%) <sup>b</sup> |
|-------|---------------------|-------------------------------------|----------------------------------|-------------------------------------|
| 1     | 0.20/0.10           | 92                                  | 84                               | 0                                   |
| 2     | 0.15/0.10           | 92                                  | 87                               | 0                                   |
| 3     | 0.13/0.10           | 94                                  | 88                               | 0                                   |
| 4     | 0.10/0.10           | 85                                  | 83                               | 0                                   |
| 5     | 0.10/0.15           | 86                                  | 84                               | 0                                   |
| 6     | 0.10/0.20           | 88                                  | 88                               | 0                                   |
| 7     | 0.10/0.25           | 87                                  | 90                               | 0                                   |
| 8     | 0.10/0.30           | 88                                  | 88                               | 0                                   |

<sup>a</sup>Reaction conditions: **1a**, **8a**, [Pd(allyl)Cl]<sub>2</sub> (2.5 mol %), **L11** (5.5 mol %), Na<sub>2</sub>CO<sub>3</sub> (3.0 equiv) and THF (0.8 mL). <sup>b</sup>Yield of isolated product. <sup>c</sup>Determined by chiral HPLC analysis.

**Table S11: Temperature screening<sup>a</sup>**

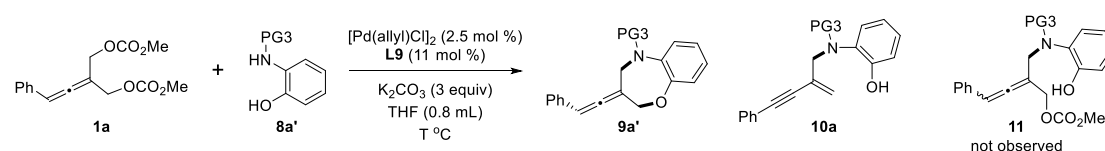

| entry | T (°C) | yield of <b>9a'</b> (%) <sup>b</sup> | ee of <b>9a'</b> (%) | yield of <b>10a</b> (%) <sup>b</sup> |
|-------|--------|--------------------------------------|----------------------|--------------------------------------|
| 1     | rt     | 10                                   | -                    | 38                                   |
| 2     | 60     | -                                    | -                    | 85                                   |

<sup>a</sup>Reaction conditions: **1a** (0.1 mmol), **8a'** (0.13 mmol), [Pd(allyl)Cl]<sub>2</sub> (2.5 mol %), **L9** (11 mol %), K<sub>2</sub>CO<sub>3</sub> (3.0 equiv) and THF (0.8 mL). <sup>b</sup>Yield of isolated product.

## 4. General condition

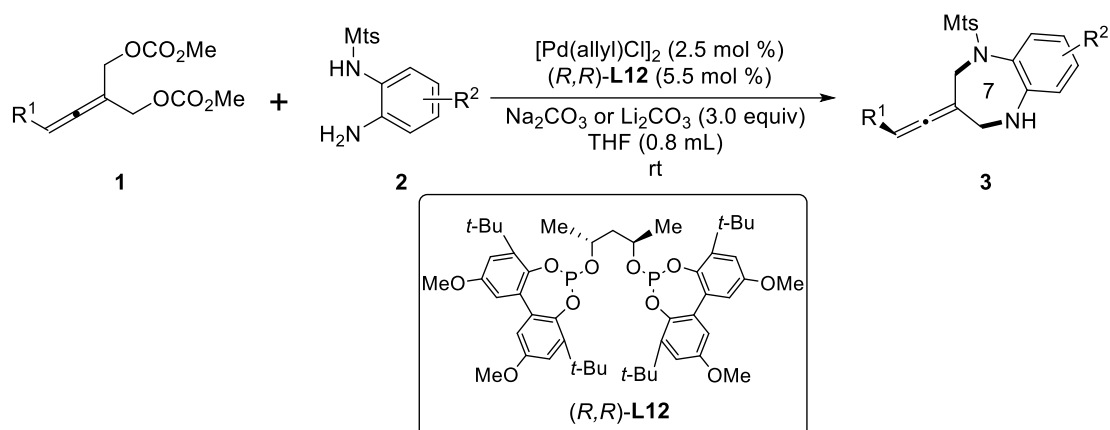

**General condition A:** In an Ar-filled glovebox, dissolving the  $[\text{Pd}(\text{allyl})\text{Cl}]_2$  (0.9 mg, 2.5 mol %), and **L12** (4.8 mg, 5.5 mol %) in THF (0.8 mL) was stirred for 15 min at rt. Subsequently, *o*-Phenylenediamine derivatives **2** (0.13 mmol, 1.3 equiv), **1** (0.1 mmol, 1 equiv), and  $\text{Na}_2\text{CO}_3$  or  $\text{Li}_2\text{CO}_3$  (3.0 equiv) were added. The reaction mixture was stirred outside the glove box and at rt for 15 hours. The solution was concentrated in vacuo and the crude product was purified by column chromatography on silica gel to afford the chiral product **3**.

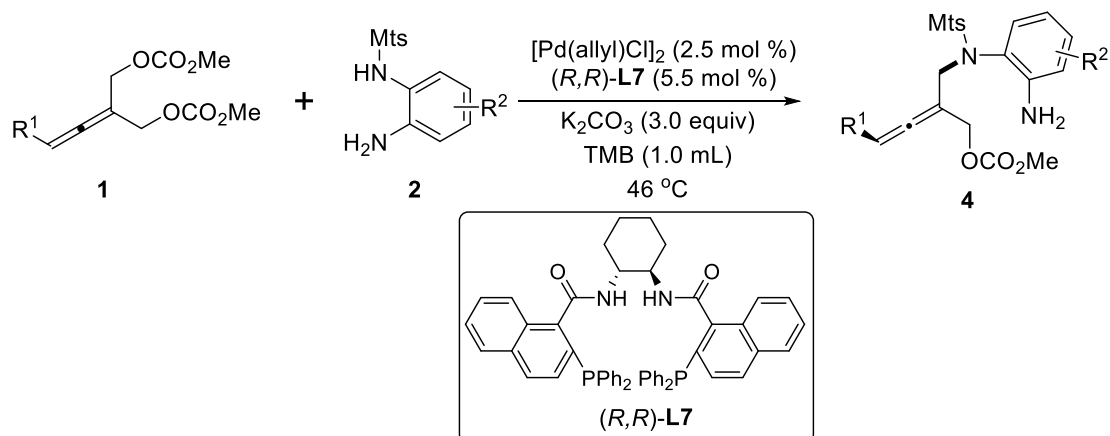

**General condition B:** In an Ar-filled glovebox, dissolving the  $[\text{Pd}(\text{allyl})\text{Cl}]_2$  (0.9 mg, 2.5 mol %), and **L7** (4.4 mg, 5.5 mol %) in TMB (1.0 mL) was stirred for 15 min at rt. Subsequently, *o*-Phenylenediamine derivatives **1** (0.1 mmol, 1 equiv), **2** (0.13 mmol, 1.3 equiv), and  $\text{K}_2\text{CO}_3$  (3.0 equiv) were added. The reaction mixture was stirred outside the glove box and heated at 46 °C for 20 hours. The solution was concentrated in vacuo and the crude product was purified by column chromatography on silica gel to afford the chiral product **4**.

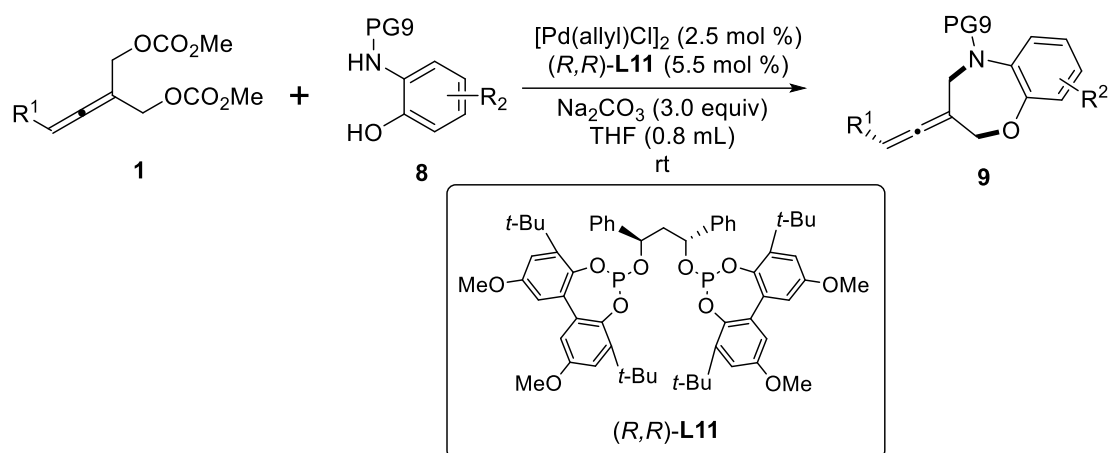

**General condition C:** In an Ar-filled glovebox, dissolving the [Pd(allyl)Cl]<sub>2</sub> (0.9 mg, 2.5 mol %), and **L11** (5.6 mg, 5.5 mol %) in THF (0.8 mL) was stirred for 15 min at rt. Subsequently, *o*-aminophenol derivatives **8** and **1**, and Na<sub>2</sub>CO<sub>3</sub> were added. The reaction mixture was stirred outside the glove box and at rt for 5 hours. The solution was concentrated in vacuo and the crude product was purified by column chromatography on silica gel to afford the chiral product **9**.

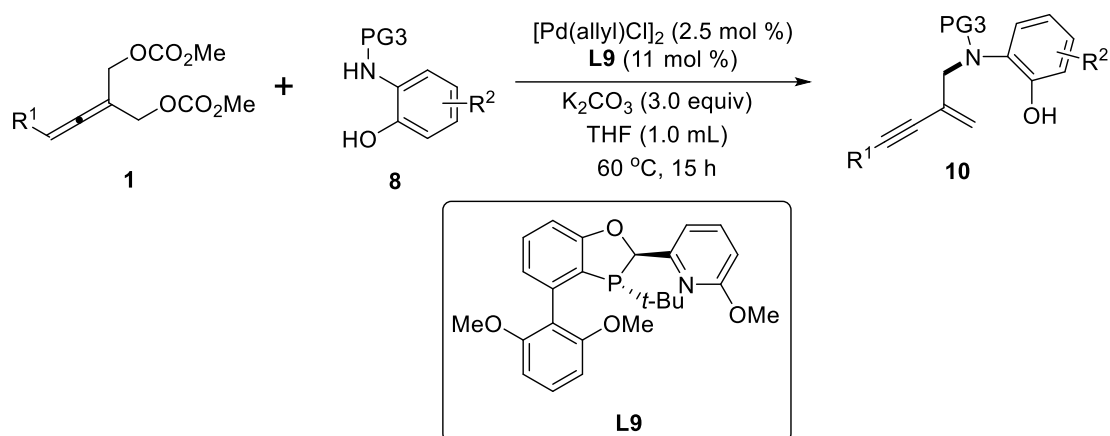

**General condition D:** In an Ar-filled glovebox, dissolving the [Pd(allyl)Cl]<sub>2</sub> (0.9 mg, 2.5 mol %), and **L9** (4.8 mg, 11 mol %) in THF (1.0 mL) was stirred for 15 min at rt. Subsequently, **8** (0.13 mmol, 1.3 equiv), **1** (0.1 mmol, 1.0 equiv), and K<sub>2</sub>CO<sub>3</sub> (3.0 equiv) were added, at 60 °C for 15 h. The reaction mixture was stirred outside the glove box. The solution was concentrated in vacuo and the crude product was purified by column chromatography on silica gel to afford the product **10**.

## 5. Transformations of the products

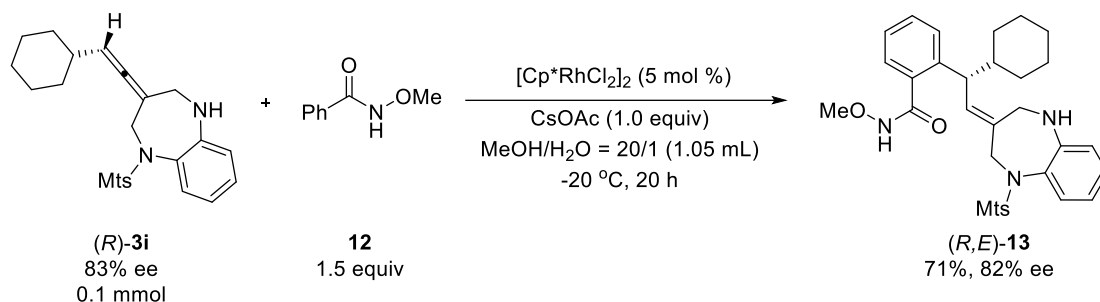

**Transformations A:** A dried Schlenk flask was charged with **12** (1.5 equiv), [Cp<sup>\*</sup>RhCl<sub>2</sub>]<sub>2</sub> (5 mol %), CsOAc (1.0 equiv) backfilled with argon for 3 times, a mixture of  $(R)$ -**3i** (43.6 mg, 0.1 mmol) in anhydrous MeOH/H<sub>2</sub>O (1.05 mL) was added. The resulting mixture was stirred at -20 °C for 20 h. Upon completion, the reaction mixture was filtered through Celite<sup>®</sup> and the filtrate was evaporated under reduced pressure and purified by flash column chromatography (PE/EA = 3/1) to afford  $(R,E)$ -**13** (41.7 mg).

**$(R,E)$ -2-(1-cyclohexyl-2-(1-(mesitylsulfonyl)-1,2,4,5-tetrahydro-3H-benzo[*b*][1,4]diazepin-3-ylidene)ethyl)-*N*-methoxybenzamide (**13**)**

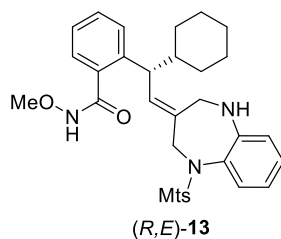

(Flash column chromatography eluent:petroleum ether/EtOAc = 3:1); yellow oily liquid, 41.7 mg, 71% yield, 82% ee;

**<sup>1</sup>H NMR** (500 MHz, CDCl<sub>3</sub>)  $\delta$  (ppm) 8.37 (s, 1H), 7.36-7.33 (m, 1H), 7.24-7.15 (m, 3H), 6.85-6.83 (m, 3H), 6.49 (d, *J* = 7.8 Hz, 1H), 6.39 (t, *J* = 7.4 Hz, 1H), 6.30-6.28 (m, 1H), 5.57 (d, *J* = 10.0 Hz, 1H), 4.49-4.25 (m, 3H), 3.96 (d, *J* = 13.9 Hz, 1H), 3.87-3.85 (m, 4H), 3.58 (t, *J* = 10.0 Hz, 1H), 2.38 (s, 6H), 2.28 (s, 3H), 1.76-1.65 (m, 2H), 1.57 (b, 3H), 1.23-1.12 (m, 2H), 1.09-1.04 (m, 2H), 0.82-0.77 (m, 2H);

**<sup>13</sup>C NMR** (125 MHz, CDCl<sub>3</sub>)  $\delta$  (ppm) 168.5, 146.9, 142.8, 142.1, 140.2, 134.6, 134.2, 132.9, 131.8, 131.7, 130.8, 130.4, 128.4, 128.1, 127.5, 125.8, 124.8, 118.2, 117.7, 64.5, 58.4, 47.0, 43.5, 43.2, 31.7, 31.1, 26.3, 26.2, 26.1, 22.8, 21.0;

**HRMS** (ESI) exact mass calcd. For  $[C_{34}H_{42}N_3O_4S]^+$  requires  $m/z$  588.2891, found  $m/z$  588.2895;

$[\alpha]_{25}^D = 24.1$  ( $c = 1.22$ ,  $CHCl_3$ );

**HPLC** (Daicel Chirapak OD-3, hexane/ *i*-PrOH = 80/20, flow rate = 1.0 mL/min, T = 25 °C, 254 nm):  $t_R = 16.4$  min (minor),  $t_R = 19.5$  min (major).

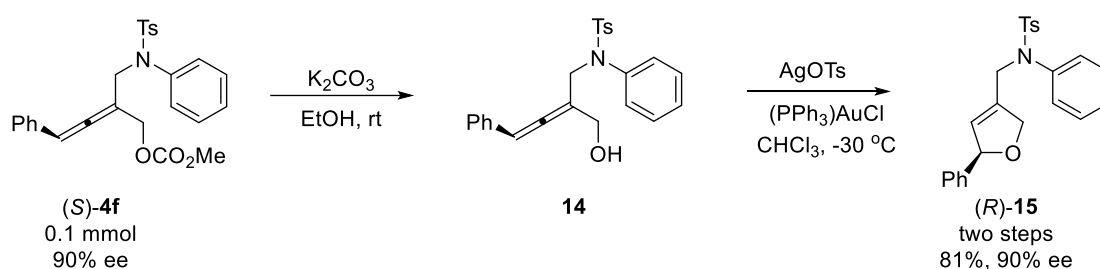

**Transformations B:** In a 10 mL screw-cap tube was placed tri-substituted allenyl acetates (*S*)-**4f** (0.1 mmol, 1.0 equiv., 46.3 mg) in MeOH (1.5 mL) under an air atmosphere. To the solution was added  $K_2CO_3$  (0.2 mmol, 2.0 equiv., 27.6 mg) at room temperature in one portion. The solution was reacted at room temperature and monitored by TLC. After 2 h, the reaction mixture was filtered, concentrated and purified by silica gel column chromatography (PE/EA=4/1) to afford the desired product (*S*)-**14** (36.5 mg, 90% yield) as a colorless oil.

To a dry Schlenk tube were added AgOTs (1.4 mg, 0.0045 mmol) in a glove box,  $PPh_3AuCl$  (2.8 mg, 0.0045 mmol), and  $CHCl_3$  (1 mL) under argon atmosphere sequentially. After being stirred at room temperature for 30 min, the resulting mixture was stirred for another 10 min at -30 °C, then the **14** (36.5 mg, 0.09 mmol) and  $CHCl_3$  (1 mL) were added. The resulting mixture was stirred at -30 °C for 12 h. The solution was purified by silica gel with 10:1 petroleum ether / ethyl acetate to afford compound **15** as a yellow oily liquid (32.8 mg, 90% yield).

**(R)-4-methyl-N-phenyl-N-((5-phenyl-2,5-dihydrofuran-3-yl)methyl)benzenesulfonamide (15)**

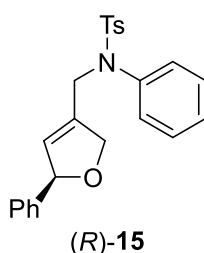

(Flash column chromatography eluent:petroleum ether/EtOAc = 7:1); yellow oily liquid, 32.8 mg, 81% yield, 90% ee;

**<sup>1</sup>H NMR** (400 MHz, CDCl<sub>3</sub>)  $\delta$  (ppm) 7.47 (d, *J* = 8.3 Hz, 2H), 7.33-7.30 (m, 3H), 7.26-7.24 (m, 2H), 7.22-7.19 (m, 3H), 7.08-7.06 (m, 2H), 6.90-6.87 (m, 2H), 5.62-5.60 (m, 1H), 5.53-5.52 (m, 1H), 4.80-4.75 (m, 1H), 4.69-4.64 (m, 1H), 4.44 (d, *J* = 14.6 Hz, 1H), 4.30 (d, *J* = 14.5 Hz, 1H), 2.43 (s, 3H);

**<sup>13</sup>C NMR** (100 MHz, CDCl<sub>3</sub>)  $\delta$  (ppm) 143.8, 141.2, 138.7, 135.7, 134.7, 129.5, 129.1, 129.0, 128.5, 128.4, 128.0, 127.9, 127.8, 126.6, 88.1, 75.8, 47.7, 21.6;

**HRMS** (ESI) exact mass calcd. For [C<sub>24</sub>H<sub>23</sub>NO<sub>3</sub>SNa]<sup>+</sup> requires *m/z* 428.1291, found *m/z* 428.1290;

[ $\alpha$ ]<sub>25</sub><sup>D</sup> = -13.5 (*c* = 0.61, CHCl<sub>3</sub>);

**HPLC** (Daicel Chirapak AD-H, hexane/ *i*-PrOH = 75/25, flow rate = 1.0 mL/min, T = 25 °C, 254 nm): *t*<sub>R</sub> = 6.2 min (minor), *t*<sub>R</sub> = 7.1 min (major).

## 6. Procedures of control experiments

**Table S12: Pd-catalyzed asymmetric [3 + 4] cycloaddition at different reaction times<sup>a</sup>**

| entry | time (h) | <b>1a</b> (yield) % <sup>b</sup> | <b>(S)-4a</b> (yield, ee) % <sup>b, c</sup> | <b>3a</b> (yield, ee) % <sup>b, c</sup> |  |
|-------|----------|----------------------------------|---------------------------------------------|-----------------------------------------|--|
| 1     | 0.17     | 43                               | 16, 76                                      | 12, 84                                  |  |
| 2     | 0.5      | 5                                | 24, 64                                      | 51, 93                                  |  |
| 3     | 2        | trace                            | -                                           | 66, 92                                  |  |
| 4     | 15       | -                                | -                                           | 81, 93                                  |  |

<sup>a</sup>Reactions were performed with **1a** (0.1 mmol), **2a** (0.13 mmol), [Pd(allyl)Cl]<sub>2</sub> (2.5 mol %), **L12** (5.5 mol %) and Na<sub>2</sub>CO<sub>3</sub> (3.0 equiv) and THF (0.8 mL). <sup>b</sup>Yield of isolated product. <sup>c</sup>Determined by chiral HPLC analysis.

**Table S13: Pd-catalyzed asymmetric intramolecular allenylc substitution of racemic allene **4a** at different reaction times<sup>a</sup>**

CCOC(=O)C1=CC=C(C=C1)C2=CC=CC=C2C3=CC=CC=C3
 $\xrightarrow[\text{Na}_2\text{CO}_3 \text{ (3.0 equiv), THF, rt, time}]{[\text{Pd}(\text{allyl})\text{Cl}]_2 \text{ (2.5 mol \%), L12 (5.5 mol \%)}$ 
CCOC(=O)C1=CC=C(C=C1)C2=CC=CC=C2 + CCOC(=O)C1=CC=C(C=C1)C2=CC=CC=C2

*racemic-4a*
(*R*)-**4a** (recovered)
(*R*)-**3a**

| entry | time | <b>4a</b> (yield, ee) % <sup>b, c</sup> | <b>3a</b> (yield, ee) % <sup>b, c</sup> |
|-------|------|-----------------------------------------|-----------------------------------------|
| 1     | 1 h  | 32, -73                                 | 50, 86                                  |
| 2     | 6 h  | 22, -96                                 | 66, 90                                  |
| 3     | 13 h | 8, -94                                  | 73, 88                                  |

Reactions were performed with *Racemic-4a* (0.1 mmol), [Pd(allyl)Cl]<sub>2</sub> (2.5 mol %), **L12** (5.5 mol %) and Na<sub>2</sub>CO<sub>3</sub> (3.0 equiv) in 0.8 mL of THF at rt. <sup>b</sup>Yield of isolated product. <sup>c</sup>Determined by chiral HPLC analysis.

**Table S14: Reactions with enantioenriched and racemic **4a**.**

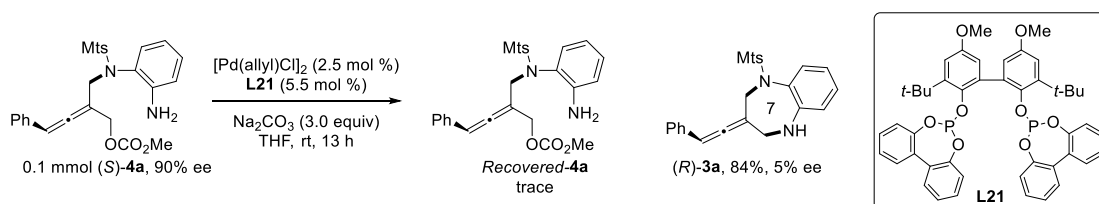

In an Argon-filled glovebox, ligand **L21** (4.3 mg, 5.5 mol %) and [Pd(allyl)Cl]<sub>2</sub> (0.9 mg, 2.5 mmol %) and THF (0.8 mL) were added to an oven-dried 10 mL screw-cap tube. After the resulting mixture was stirred at rt for 15 min, (*S*)-**4a** (0.1 mmol) and Na<sub>2</sub>CO<sub>3</sub> (3.0 equiv) were added. The screw-cap tube was moved out of the glovebox and at rt for 13 hours. The reaction mixture was concentrated under reduced pressure. The residue was purified by flash column chromatography on silica gel to afford the product (*R*)-**3a** (36.1 mg, 84%, 5% ee).

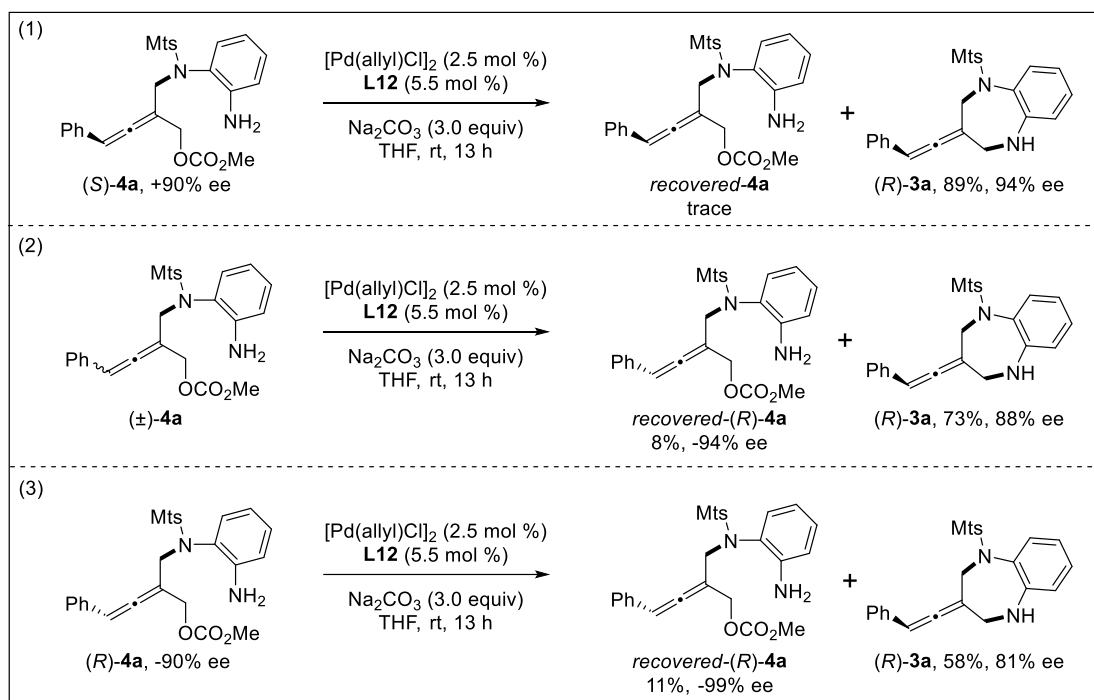

In an Argon-filled glovebox, ligand **L12** (4.8 mg, 5.5 mol %) and [Pd(allyl)Cl]<sub>2</sub> (0.9 mg, 2.5 mmol %) and THF (0.8 mL) were added to an oven-dried 10 mL screw-cap tube. After the resulting mixture was stirred at rt for 15 min, (*S*) or *racemic* or (*R*)-**4a** (0.1 mmol) and Na<sub>2</sub>CO<sub>3</sub> (3.0 equiv) were added. The screw-cap tube was moved out of the glovebox and at rt for 13 hours. The reaction mixture was concentrated under reduced pressure. The residue was purified by flash column chromatography on silica gel to afford the product **3a** and recovered **4a**.

When the starting material was (*S*)-**4a**, afford the desired product (*R*)-**3a** (89% yield, 94% ee); When the starting material was *racemic*-**4a**, afford the desired product (*R*)-**3a** (73% yield, 88% ee) and recovered (*R*)-**4a** (8% yield, -94% ee); When the starting material was (*R*)-**4a**, afford the desired product (*R*)-**3a** (58% yield, 81% ee) and recovered (*R*)-**4a** (11% yield, -99% ee).

#### Intermediate **4a** in the absence of metal ligands:

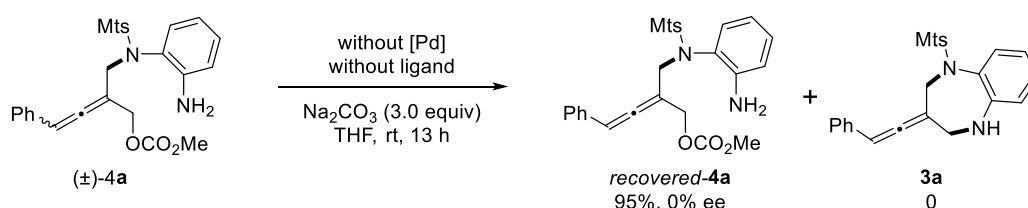

**Table S15: Pd-catalyzed 10a reactions of use general condition C**

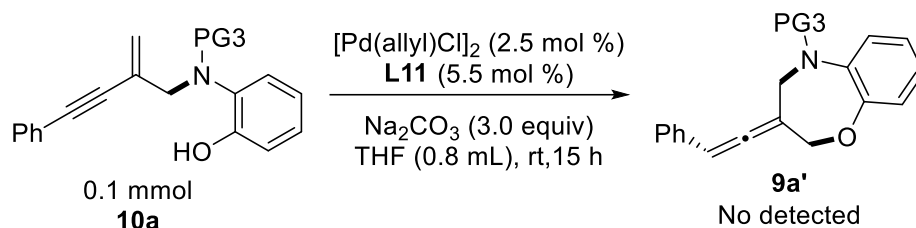

In an Argon-filled glovebox, ligand **L11** (5.6 mg, 5.5 mol %) and [Pd(allyl)Cl]<sub>2</sub> (0.9 mg, 2.5 mmol %) and THF (0.8 mL) were added to an oven-dried 10 mL screw-cap tube. After the resulting mixture was stirred at rt for 15 min, **10a** (0.1 mmol) and Na<sub>2</sub>CO<sub>3</sub> (3.0 equiv) were added. The screw-cap tube was moved out of the glovebox and at rt for 15 hours. The reaction mixture was concentrated under reduced pressure. The residue was purified by flash column chromatography on silica gel to recovered **10a** (89% yield), not observed **9a'**.

### Reversibility and racemization experiments of [3 + 4] cycloaddition products

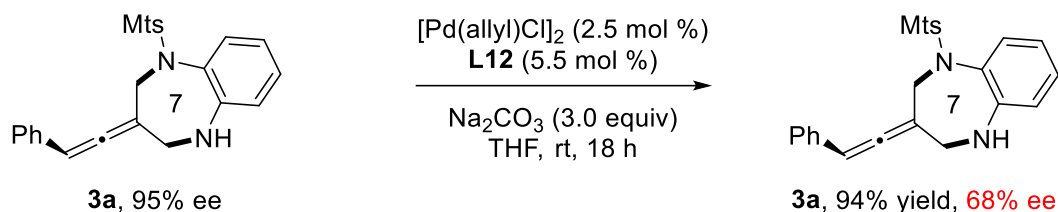

In an Argon-filled glovebox, ligand **L12** (4.8 mg, 5.5 mol %) and [Pd(allyl)Cl]<sub>2</sub> (0.9 mg, 2.5 mmol %) and THF (0.8 mL) were added to an oven-dried 10 mL screw-cap tube. After the resulting mixture was stirred at rt for 15 min, (*R*)-**3a** (0.1 mmol, 95% ee) and Na<sub>2</sub>CO<sub>3</sub> (3.0 equiv) were added. The screw-cap tube was moved out of the glovebox and at rt for 18 hours. The reaction mixture was concentrated under reduced pressure. The residue was purified by flash column chromatography on silica gel to recovered (*R*)-**3a** (40.4 mg, 94%, 68% ee).

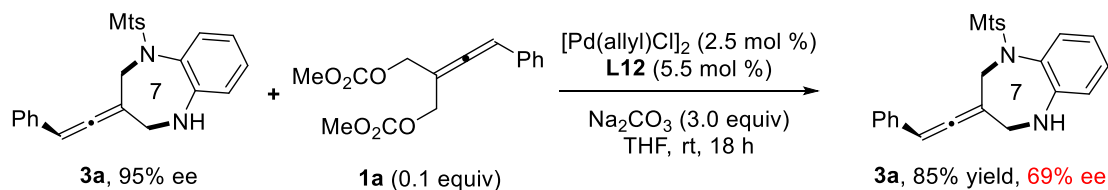

In an Argon-filled glovebox, ligand **L12** (4.8 mg, 5.5 mol %) and [Pd(allyl)Cl]<sub>2</sub> (0.9 mg, 2.5 mmol %) and THF (0.8 mL) were added to an oven-dried 10 mL screw-cap tube.

After the resulting mixture was stirred at rt for 15 min, (*R*)-**3a** (0.1 mmol, 95% ee) and **1a** (0.1 equiv) and Na<sub>2</sub>CO<sub>3</sub> (3.0 equiv) were added. The screw-cap tube was moved out of the glovebox and at rt for 18 hours. The reaction mixture was concentrated under reduced pressure. The residue was purified by flash column chromatography on silica gel to recovered (*R*)-**3a** (36.6 mg, 85%, 69% ee).

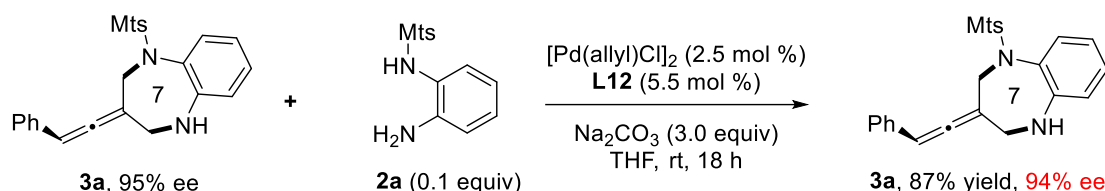

In an Argon-filled glovebox, ligand **L12** (4.8 mg, 5.5 mol %) and [Pd(allyl)Cl]<sub>2</sub> (0.9 mg, 2.5 mmol %) and THF (0.8 mL) were added to an oven-dried 10 mL screw-cap tube. After the resulting mixture was stirred at rt for 15 min, (*R*)-**3a** (0.1 mmol, 95% ee) and **2a** (0.1 equiv) and Na<sub>2</sub>CO<sub>3</sub> (3.0 equiv) were added. The screw-cap tube was moved out of the glovebox and at rt for 18 hours. The reaction mixture was concentrated under reduced pressure. The residue was purified by flash column chromatography on silica gel to recovered (*R*)-**3a** (37.5 mg, 87%, 94% ee).

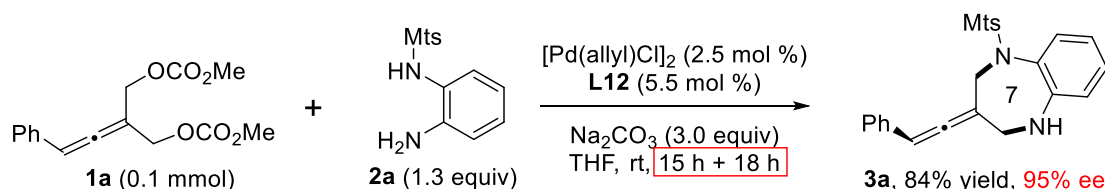

In an Argon-filled glovebox, ligand **L12** (4.8 mg, 5.5 mol %) and [Pd(allyl)Cl]<sub>2</sub> (0.9 mg, 2.5 mmol %) and THF (0.8 mL) were added to an oven-dried 10 mL screw-cap tube. After the resulting mixture was stirred at rt for 15 min, **1a** (0.1 mmol) and **2a** (1.3 equiv) and Na<sub>2</sub>CO<sub>3</sub> (3.0 equiv) were added. The screw-cap tube was moved out of the glovebox and at rt for 33 hours. The reaction mixture was concentrated under reduced pressure. The residue was purified by flash column chromatography on silica gel to afford the product (*R*)-**3a** (36.2 mg, 84%, 95% ee).

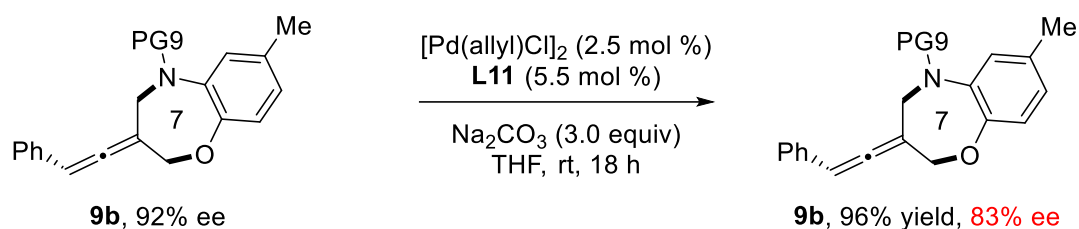

In an Argon-filled glovebox, ligand **L11** (5.6 mg, 5.5 mol %) and  $\text{[Pd(allyl)Cl]}_2$  (0.9 mg, 2.5 mmol %) and THF (0.8 mL) were added to an oven-dried 10 mL screw-cap tube. After the resulting mixture was stirred at rt for 15 min, (*R*)-**9b** (0.1 mmol, 92% ee) and  $\text{Na}_2\text{CO}_3$  (3.0 equiv) were added. The screw-cap tube was moved out of the glovebox and at rt for 18 hours. The reaction mixture was concentrated under reduced pressure. The residue was purified by flash column chromatography on silica gel to recovered (*R*)-**9b** (51.7 mg, 96%, 83% ee).

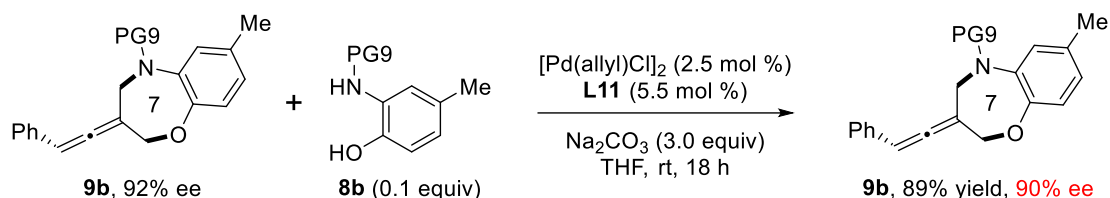

In an Argon-filled glovebox, ligand **L11** (5.6 mg, 5.5 mol %) and  $\text{[Pd(allyl)Cl]}_2$  (0.9 mg, 2.5 mmol %) and THF (0.8 mL) were added to an oven-dried 10 mL screw-cap tube. After the resulting mixture was stirred at rt for 15 min, (*R*)-**9b** (0.1 mmol, 92% ee) and **8b** (0.1 equiv) and  $\text{Na}_2\text{CO}_3$  (3.0 equiv) were added. The screw-cap tube was moved out of the glovebox and at rt for 18 hours. The reaction mixture was concentrated under reduced pressure. The residue was purified by flash column chromatography on silica gel to recovered (*R*)-**9b** (47.9 mg, 89%, 90% ee).

**Table S16: 1a and 8 are reacted using condition B**

| entry | PG  | yield of <b>11</b> (%) <sup>b</sup> |
|-------|-----|-------------------------------------|
| 1     | PG9 | 0                                   |
| 2     | PG2 | 0                                   |

In an Argon-filled glovebox, ligand **L7** (4.4 mg, 5.5 mol %) and  $\text{[Pd(allyl)Cl]}_2$  (0.9 mg, 2.5 mmol %) and TMB (0.8 mL) were added to an oven-dried 10 mL screw-cap tube.

After the resulting mixture was stirred at rt for 15 min, **1a** (0.1 mmol) and **8** (1.3 equiv) and K<sub>2</sub>CO<sub>3</sub> (3.0 equiv) were added. The screw-cap tube was moved out of the glovebox and at 46 °C for 20 hours. The reaction mixture is condensed under pressure reduction. The residue was purified by silica gel flash column chromatography and no **11** was detected.

**Table S17: 1a and 2 are reacted using condition D**

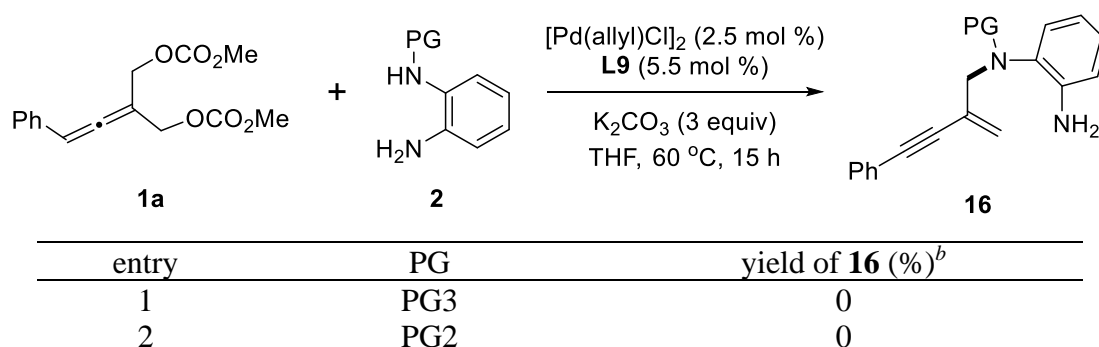

In an Argon-filled glovebox, ligand **L9** (4.4 mg, 11 mol %) and [Pd(allyl)Cl]<sub>2</sub> (0.9 mg, 2.5 mmol %) and THF (0.8 mL) were added to an oven-dried 10 mL screw-cap tube. After the resulting mixture was stirred at rt for 15 min, **1a** (0.1 mmol) and **2** (1.3 equiv) and K<sub>2</sub>CO<sub>3</sub> (3.0 equiv) were added. The screw-cap tube was moved out of the glovebox and at 60 °C for 15 hours. The reaction mixture is condensed under pressure reduction. The residue was purified by silica gel flash column chromatography and no **16** was detected.

## 7. Single crystal X-ray diffraction data

### X-ray crystallographic data for (*R*)-**3n**

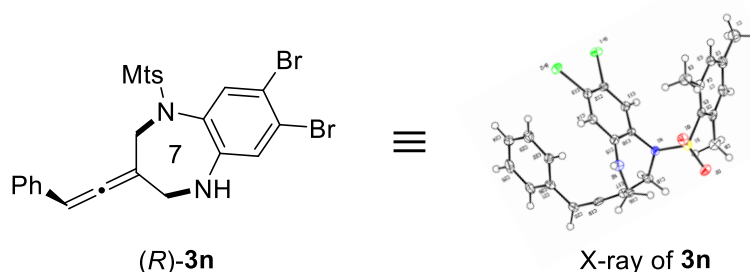

(*R*)-**3n**. (CCDC NO: 2251580)

Identification code                      4

Empirical formula                      C<sub>26</sub> H<sub>24</sub> Br<sub>2</sub> N<sub>2</sub> O<sub>2</sub> S

Formula weight                      588.35

|                                   |                                                                                                               |
|-----------------------------------|---------------------------------------------------------------------------------------------------------------|
| Temperature                       | 100.00 K                                                                                                      |
| Wavelength                        | 0.71073 Å                                                                                                     |
| Crystal system, space group       | Orthorhombic, P2(1)2(1)2(1)                                                                                   |
| Unit cell dimensions              | a = 5.8154(7) Å    alpha = 90 deg.<br>b = 17.400(2) Å    beta = 90 deg.<br>c = 23.776(3) Å    gamma = 90 deg. |
| Volume                            | 2405.9(5) Å <sup>3</sup>                                                                                      |
| Z, Calculated density             | 4, 1.624 Mg/m <sup>3</sup>                                                                                    |
| Absorption coefficient            | 3.483 mm <sup>-1</sup>                                                                                        |
| F(000)                            | 1184                                                                                                          |
| Crystal size                      | 0.2 x 0.18 x 0.16 mm                                                                                          |
| Theta range for data collection   | 2.075 to 28.277 deg.                                                                                          |
| Limiting indices                  | -7<=h<=7, -22<=k<=23, -31<=l<=31                                                                              |
| Reflections collected / unique    | 5619 / 5619 [R(int) = 0.0477]                                                                                 |
| Completeness to theta = 25.242    | 98.9 %                                                                                                        |
| Absorption correction             | Semi-empirical from equivalents                                                                               |
| Max. and min. transmission        | 0.745686 and 0.450138                                                                                         |
| Refinement method                 | Full-matrix least-squares on F <sup>2</sup>                                                                   |
| Data / restraints / parameters    | 5619 / 0 / 301                                                                                                |
| Goodness-of-fit on F <sup>2</sup> | 1.039                                                                                                         |
| Final R indices [I>2sigma(I)]     | R1 = 0.0472, wR2 = 0.1101                                                                                     |
| R indices (all data)              | R1 = 0.0661, wR2 = 0.1185                                                                                     |
| Absolute structure parameter      | 0.044(11)                                                                                                     |
| Extinction coefficient            | n/a                                                                                                           |
| Largest diff. peak and hole       | 0.877 and -0.611 e.Å <sup>-3</sup>                                                                            |

### X-ray crystallographic data for (S)-4f

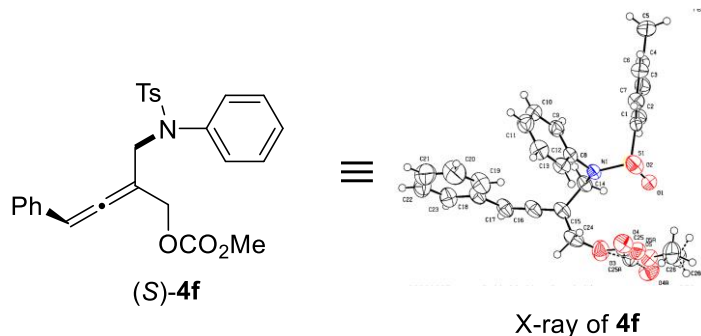

**(S)-4f. (CCDC NO: 2251582)**

|                                             |                                                               |
|---------------------------------------------|---------------------------------------------------------------|
| Identification code                         | cu_20221205_Zh_YN_LPF_0m                                      |
| Empirical formula                           | C <sub>26</sub> H <sub>25</sub> NO <sub>5</sub> S             |
| Formula weight                              | 463.53                                                        |
| Temperature/K                               | 193.00                                                        |
| Crystal system                              | orthorhombic                                                  |
| Space group                                 | P2 <sub>1</sub> 2 <sub>1</sub> 2 <sub>1</sub>                 |
| a/Å                                         | 6.04550(10)                                                   |
| b/Å                                         | 15.2328(3)                                                    |
| c/Å                                         | 25.3404(5)                                                    |
| α/°                                         | 90                                                            |
| β/°                                         | 90                                                            |
| γ/°                                         | 90                                                            |
| Volume/Å <sup>3</sup>                       | 2333.59(8)                                                    |
| Z                                           | 4                                                             |
| ρ <sub>calc</sub> /g/cm <sup>3</sup>        | 1.319                                                         |
| μ/mm <sup>-1</sup>                          | 1.546                                                         |
| F(000)                                      | 976.0                                                         |
| Crystal size/mm <sup>3</sup>                | 0.15 × 0.13 × 0.11                                            |
| Radiation                                   | CuKα (λ = 1.54178)                                            |
| 2Θ range for data collection/°              | 6.77 to 136.82                                                |
| Index ranges                                | -7 ≤ h ≤ 7, -18 ≤ k ≤ 18, -30 ≤ l ≤ 30                        |
| Reflections collected                       | 23877                                                         |
| Independent reflections                     | 4285 [R <sub>int</sub> = 0.0586, R <sub>sigma</sub> = 0.0437] |
| Data/restraints/parameters                  | 4285/0/339                                                    |
| Goodness-of-fit on F <sup>2</sup>           | 1.047                                                         |
| Final R indexes [I ≥ 2σ (I)]                | R <sub>1</sub> = 0.0366, wR <sub>2</sub> = 0.0922             |
| Final R indexes [all data]                  | R <sub>1</sub> = 0.0406, wR <sub>2</sub> = 0.0954             |
| Largest diff. peak/hole / e Å <sup>-3</sup> | 0.25/-0.21                                                    |
| Flack parameter                             | 0.024(8)                                                      |

## X-ray crystallographic data for (R)-9a

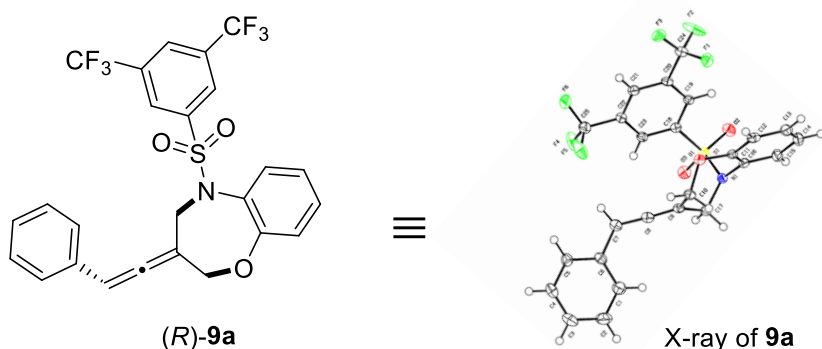

### (R)-9a. (CCDC NO: 2251583)

|                                   |                                                                                                                 |
|-----------------------------------|-----------------------------------------------------------------------------------------------------------------|
| Identification code               | 1                                                                                                               |
| Empirical formula                 | C <sub>25</sub> H <sub>17</sub> F <sub>6</sub> N O <sub>3</sub> S                                               |
| Formula weight                    | 525.46                                                                                                          |
| Temperature                       | 100.00 K                                                                                                        |
| Wavelength                        | 0.71073 Å                                                                                                       |
| Crystal system, space group       | Orthorhombic, P2(1)2(1)2(1)                                                                                     |
| Unit cell dimensions              | a = 8.0066(3) Å    alpha = 90 deg.<br>b = 14.4740(6) Å    beta = 90 deg.<br>c = 19.8606(8) Å    gamma = 90 deg. |
| Volume                            | 2301.60(16) Å <sup>3</sup>                                                                                      |
| Z, Calculated density             | 4, 1.516 Mg/m <sup>3</sup>                                                                                      |
| Absorption coefficient            | 0.218 mm <sup>-1</sup>                                                                                          |
| F(000)                            | 1072                                                                                                            |
| Crystal size                      | 0.2 x 0.18 x 0.16 mm                                                                                            |
| Theta range for data collection   | 2.051 to 28.298 deg.                                                                                            |
| Limiting indices                  | -10 ≤ h ≤ 9, -19 ≤ k ≤ 19, -26 ≤ l ≤ 23                                                                         |
| Reflections collected / unique    | 19572 / 5707 [R(int) = 0.0279]                                                                                  |
| Completeness to theta = 25.242    | 100.0 %                                                                                                         |
| Absorption correction             | Semi-empirical from equivalents                                                                                 |
| Max. and min. transmission        | 0.7457 and 0.6863                                                                                               |
| Refinement method                 | Full-matrix least-squares on F <sup>2</sup>                                                                     |
| Data / restraints / parameters    | 5707 / 0 / 325                                                                                                  |
| Goodness-of-fit on F <sup>2</sup> | 1.039                                                                                                           |

|                                      |                                    |
|--------------------------------------|------------------------------------|
| Final R indices [ $I > 2\sigma(I)$ ] | $R1 = 0.0298$ , $wR2 = 0.0700$     |
| R indices (all data)                 | $R1 = 0.0324$ , $wR2 = 0.0717$     |
| Absolute structure parameter         | 0.01(2)                            |
| Extinction coefficient               | n/a                                |
| Largest diff. peak and hole          | 0.246 and -0.304 e.Å <sup>-3</sup> |

## 8. References

- [1] C. Manzuna Sapu, J.-E. Bäckvall, J. Deska, *Angew. Chem. Int. Ed.* 2011, **50**, 9731.
- [2] S. Song, S. Ma, *Chin. J. Chem.* 2020, **38**, 1233.
- [3] D. Zhang, Y.-B. Shao, W. Xie, Y. Chen, W. Liu, H. Bao, F. He, X.-S. Xue, X. Yang, *ACS Catal.* 2022, **12**, 14609.

## 9. Spectral data of products

### Spectral data of products 1

#### dimethyl (2-(2-phenylvinylidene)propane-1,3-diyl) bis(carbonate)

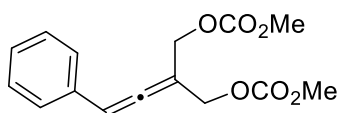

**1a**

Yellow liquid, 74% yield, flash column chromatography (SiO<sub>2</sub>, 10:1 PE/EtOAc);

**<sup>1</sup>H NMR** (400 MHz, CDCl<sub>3</sub>)  $\delta$  7.33-7.22 (m, 5H), 6.43-6.42 (m, 1H), 4.84-4.75 (m, 4H), 3.75 (s, 6H);

**<sup>13</sup>C NMR** (100 MHz, CDCl<sub>3</sub>)  $\delta$  205.3, 155.4, 132.5, 128.7, 127.8, 127.3, 99.9, 98.2, 65.5, 54.9;

**HRMS** (ESI)  $m/z$ : [M + H]<sup>+</sup> Calcd for C<sub>15</sub>H<sub>17</sub>O<sub>6</sub><sup>+</sup> 293.1020; Found 293.1023.

#### dimethyl (2-(2-(p-tolyl)vinylidene)propane-1,3-diyl) bis(carbonate)

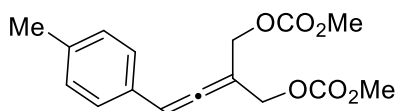

**1b**

Yellow liquid, 92% yield, flash column chromatography (SiO<sub>2</sub>, 10:1 PE/EtOAc);

**<sup>1</sup>H NMR** (400 MHz, CDCl<sub>3</sub>)  $\delta$  7.10-7.02 (m, 4H), 6.32 (s, 1H), 4.75-4.66 (m, 4H), 3.67 (s, 6H), 2.24 (s, 3H);

**<sup>13</sup>C NMR** (100 MHz, CDCl<sub>3</sub>)  $\delta$  205.2, 155.4, 137.7, 129.5, 129.4, 127.3, 99.7, 98.0, 65.7, 54.9, 21.2;

**HRMS** (ESI)  $m/z$ : [M + H]<sup>+</sup> Calcd for C<sub>16</sub>H<sub>19</sub>O<sub>6</sub><sup>+</sup> 307.1176; Found 307.1175.

#### 2-(2-([1,1'-biphenyl]-4-yl)vinylidene)propane-1,3-diyl dimethyl bis(carbonate)

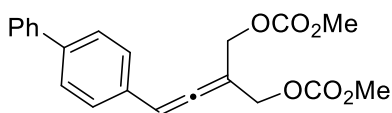

**1c**

White solid, 76% yield, flash column chromatography (SiO<sub>2</sub>, 10:1 PE/EtOAc);

**<sup>1</sup>H NMR** (400 MHz, CDCl<sub>3</sub>)  $\delta$  7.60-7.54 (m, 4H), 7.45-7.42 (m, 2H), 7.36-7.34 (m, 3H), 6.48-6.47 (m, 1H), 4.86-4.78 (m, 4H), 3.78 (s, 6H);

**<sup>13</sup>C NMR** (100 MHz, CDCl<sub>3</sub>)  $\delta$  205.6, 155.5, 140.7, 140.6, 131.5, 128.8, 127.8, 127.4, 127.0, 100.0, 97.9, 65.6, 55.0;

**HRMS** (ESI)  $m/z$ : [M + H]<sup>+</sup> Calcd for C<sub>21</sub>H<sub>21</sub>O<sub>6</sub><sup>+</sup> 369.1333; Found 369.1336.

**2-(2-(4-methoxyphenyl)vinylidene)propane-1,3-diyl dimethyl bis(carbonate)**

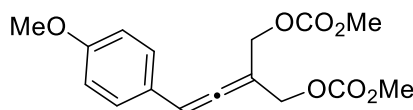

**1d**

Yellow liquid, 79% yield, flash column chromatography (SiO<sub>2</sub>, 10:1 PE/EtOAc);

**<sup>1</sup>H NMR** (600 MHz, CDCl<sub>3</sub>)  $\delta$  7.22-7.19 (m, 2H), 6.86-6.84 (m, 2H), 6.40-6.39 (m, 1H), 4.82-4.75 (m, 4H), 3.79 (s, 3H), 3.76 (s, 6H);

**<sup>13</sup>C NMR** (150 MHz, CDCl<sub>3</sub>)  $\delta$  205.0, 159.4, 155.5, 128.5, 124.7, 114.2, 99.7, 97.7, 65.8, 55.3, 54.9;

**HRMS** (ESI)  $m/z$ : [M + H]<sup>+</sup> Calcd for C<sub>16</sub>H<sub>19</sub>O<sub>7</sub><sup>+</sup> 323.1125; Found 323.1127.

**2-(2-(4-chlorophenyl)vinylidene)propane-1,3-diyl dimethyl bis(carbonate)**

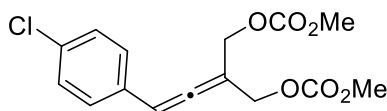

**1e**

Yellow liquid, 80% yield, flash column chromatography (SiO<sub>2</sub>, 10:1 PE/EtOAc);

**<sup>1</sup>H NMR** (600 MHz, CDCl<sub>3</sub>)  $\delta$  7.28 (d,  $J$  = 8.4 Hz, 2H), 7.21 (d,  $J$  = 8.4 Hz, 2H), 6.39 (s, 1H), 4.83-4.76 (m, 4H), 3.76 (s, 6H);

**<sup>13</sup>C NMR** (150 MHz, CDCl<sub>3</sub>)  $\delta$  205.2, 155.4, 133.5, 131.1, 128.9, 128.5, 100.4, 97.4, 65.3, 55.0;

**HRMS** (ESI)  $m/z$ : [M + H]<sup>+</sup> Calcd for C<sub>15</sub>H<sub>16</sub>ClO<sub>6</sub><sup>+</sup> 327.0630; Found 327.0629.

**dimethyl (2-(2-(*m*-tolyl)vinylidene)propane-1,3-diyl) bis(carbonate)**

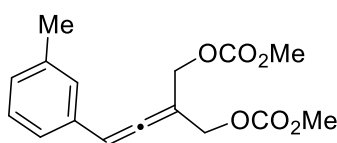

**1f**

Yellow liquid, 79% yield, flash column chromatography (SiO<sub>2</sub>, 10:1 PE/EtOAc);

**<sup>1</sup>H NMR** (500 MHz, CDCl<sub>3</sub>)  $\delta$  7.22-7.18 (m, 1H), 7.09-7.04 (m, 3H), 6.40-6.39 (m, 1H), 4.84-4.76 (m, 4H), 3.77 (s, 6H), 2.33 (s, 3H);

**<sup>13</sup>C NMR** (125 MHz, CDCl<sub>3</sub>)  $\delta$  205.5, 155.5, 138.3, 132.3, 128.7, 128.6, 128.0, 124.5, 99.7, 98.1, 65.7, 55.0, 21.3;

**HRMS** (ESI)  $m/z$ : [M + H]<sup>+</sup> Calcd for C<sub>16</sub>H<sub>19</sub>O<sub>6</sub><sup>+</sup> 307.1176; Found 307.1179.

**2-(2-(3-fluorophenyl)vinylidene)propane-1,3-diyl dimethyl bis(carbonate)**

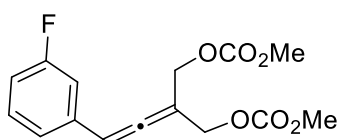

**1g**

Yellow liquid, 76% yield, flash column chromatography (SiO<sub>2</sub>, 10:1 PE/EtOAc);

**<sup>1</sup>H NMR** (600 MHz, CDCl<sub>3</sub>)  $\delta$  7.28-7.26 (m, 1H), 7.06-6.92 (m, 3H), 6.41 (s, 1H), 4.80 (dd,  $J$  = 20.6, 12.1 Hz, 4H), 3.77 (s, 6H);

**<sup>13</sup>C NMR** (150 MHz, CDCl<sub>3</sub>)  $\delta$  205.4, 163.1 (d,  $J_{C-F}$  = 246.0 Hz), 155.4, 135.0 (d,  $J_{C-F}$  = 7.7 Hz), 130.1 (d,  $J_{C-F}$  = 8.2 Hz), 123.1, 114.7 (d,  $J_{C-F}$  = 21.3 Hz), 113.9 (d,  $J_{C-F}$  = 22.5 Hz), 100.5, 97.5, 65.3, 55.0;

**<sup>19</sup>F NMR** (564 MHz, CDCl<sub>3</sub>)  $\delta$  -113.1;

**HRMS** (ESI)  $m/z$ : [M + H]<sup>+</sup> Calcd for C<sub>15</sub>H<sub>16</sub>FO<sub>6</sub><sup>+</sup> 311.0925; Found 311.0929.

**dimethyl (2-(2-(o-tolyl)vinylidene)propane-1,3-diyl) bis(carbonate)**

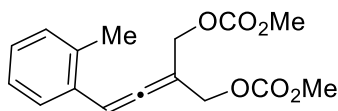

**1h**

Yellow liquid, 77% yield, flash column chromatography (SiO<sub>2</sub>, 10:1 PE/EtOAc);

**<sup>1</sup>H NMR** (500 MHz, CDCl<sub>3</sub>)  $\delta$  7.32-7.30 (m, 1H), 7.16-7.14 (m, 3H), 6.63-6.62 (m, 1H), 4.84-4.77 (m, 4H), 3.77 (s, 6H), 2.35 (s, 3H);

**<sup>13</sup>C NMR** (125 MHz, CDCl<sub>3</sub>)  $\delta$  206.2, 155.5, 135.6, 130.8, 130.6, 128.0, 127.8, 126.3, 98.7, 95.5, 65.8, 55.0, 19.9;

**HRMS** (ESI)  $m/z$ : [M + H]<sup>+</sup> Calcd for C<sub>16</sub>H<sub>19</sub>O<sub>6</sub><sup>+</sup> 307.1176; Found 307.1177.

**dimethyl (2-(2-(naphthalen-2-yl)vinylidene)propane-1,3-diyl) bis(carbonate)**

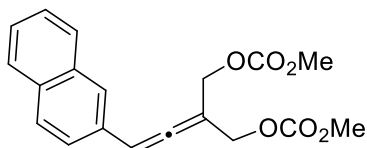

**1i**

White solid, 79% yield, flash column chromatography (SiO<sub>2</sub>, 10:1 PE/EtOAc);

**<sup>1</sup>H NMR** (400 MHz, CDCl<sub>3</sub>)  $\delta$  7.78-7.76 (m, 3H), 7.67 (s, 1H), 7.48-7.42 (m, 3H), 6.61 (s, 1H), 4.84 (dd,  $J$  = 20.4, 12.3 Hz, 4H), 3.76 (s, 6H);

**<sup>13</sup>C NMR** (100 MHz, CDCl<sub>3</sub>)  $\delta$  205.8, 155.5, 133.5, 133.0, 130.0, 128.4, 127.9, 127.8, 126.6, 126.4, 126.1, 124.8, 100.1, 98.6, 65.6, 55.0;

**HRMS** (ESI)  $m/z$ : [M + H]<sup>+</sup> Calcd for C<sub>19</sub>H<sub>19</sub>O<sub>6</sub><sup>+</sup> 343.1176; Found 343.1175.

**dimethyl (2-(non-1-en-1-ylidene)propane-1,3-diyl) bis(carbonate)**

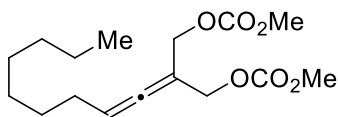

**1g**

Yellow liquid, 87% yield, flash column chromatography (SiO<sub>2</sub>, 20:1 PE/EtOAc);

**<sup>1</sup>H NMR** (500 MHz, CDCl<sub>3</sub>)  $\delta$  5.41 (s, 1H), 4.68 (s, 4H), 3.79 (s, 6H), 2.06-2.03 (m, 2H), 1.41-1.28 (m, 10H), 0.89-0.87 (m, 3H);

**<sup>13</sup>C NMR** (125 MHz, CDCl<sub>3</sub>)  $\delta$  204.6, 155.5, 95.4, 94.6, 66.3, 54.8, 31.8, 29.0, 28.9, 28.8, 28.1, 22.6, 14.0;

**HRMS** (ESI)  $m/z$ : [M + H]<sup>+</sup> Calcd for C<sub>16</sub>H<sub>27</sub>O<sub>6</sub><sup>+</sup> 315.1802; Found 315.1802.

### 2-(2-cyclohexylvinylidene)propane-1,3-diyl dimethyl bis(carbonate)

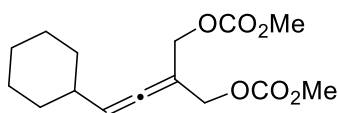

**1k**

Yellow liquid, 81% yield, flash column chromatography (SiO<sub>2</sub>, 20:1 PE/EtOAc);

**<sup>1</sup>H NMR** (400 MHz, CDCl<sub>3</sub>)  $\delta$  5.42-5.40 (m, 1H), 4.68 (m, 4H), 3.78 (s, 6H), 2.04-2.02 (m, 1H), 1.76-1.62 (m, 5H), 1.29-1.04 (m, 5H);

**<sup>13</sup>C NMR** (100 MHz, CDCl<sub>3</sub>)  $\delta$  203.4, 155.4, 100.4, 96.4, 66.2, 54.6, 36.7, 32.6, 25.8, 25.7;

**HRMS** (ESI)  $m/z$ : [M + H]<sup>+</sup> Calcd for C<sub>15</sub>H<sub>23</sub>O<sub>6</sub><sup>+</sup> 299.1489; Found 299.1487.

### Spectral data of products 3

**(R)-1-(mesitylsulfonyl)-3-(2-phenylvinylidene)-2,3,4,5-tetrahydro-1H-benzo[b][1,4]diazepine (3a)**

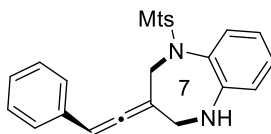

**3a**, 81%, 95% ee

(Flash column chromatography eluent:petroleum ether/EtOAc = 8:1); white solid, 34.8 mg, 81% yield, 95% ee;

**<sup>1</sup>H NMR** (400 MHz, CDCl<sub>3</sub>)  $\delta$  (ppm) 7.23-7.21 (m, 2H), 7.18-7.14 (m, 3H), 7.07-7.03 (m, 1H), 6.93 (s, 2H), 6.67-6.65 (m, 1H), 6.51-6.47 (m, 1H), 6.44-6.42 (m, 1H), 6.20 (s, 1H), 4.70 (s, 2H), 4.21-4.08 (m, 3H), 2.46 (s, 6H), 2.32 (s, 3H);

**<sup>13</sup>C NMR** (100 MHz, CDCl<sub>3</sub>)  $\delta$  (ppm) 201.5, 146.3, 142.4, 140.2, 134.6, 133.9, 131.9, 130.3, 128.9, 128.7, 127.2, 127.0, 125.2, 118.6, 118.6, 102.9, 96.5, 53.1, 47.1, 22.9, 21.0;

**HRMS** (ESI) exact mass calcd. For [C<sub>26</sub>H<sub>26</sub>N<sub>2</sub>O<sub>2</sub>SNa]<sup>+</sup> requires  $m/z$  453.1607, found  $m/z$  453.1609;

$[\alpha]_{25}^D = -23.11$  ( $c = 0.53$ , CHCl<sub>3</sub>);

**HPLC** (Daicel Chirapak AD-H, hexane/ *i*-PrOH = 90/10, flow rate = 1.0 mL/min, T = 25 °C, 254 nm):  $t_R = 25.1$  min (minor),  $t_R = 30.4$  min (major).

**(*R*)-1-(mesitylsulfonyl)-3-(2-(*p*-tolyl)vinylidene)-2,3,4,5-tetrahydro-1*H*-benzo[*b*][1,4]diazepine (3b)**

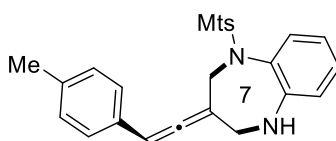

**3b**, 81%, 94% ee

(Flash column chromatography eluent:petroleum ether/EtOAc = 8:1); white solid, 36.0 mg, 81% yield, 94% ee;

**<sup>1</sup>H NMR** (400 MHz, CDCl<sub>3</sub>)  $\delta$  (ppm) 7.06-7.03 (m, 5H), 6.93 (s, 2H), 6.67-6.65 (m, 1H), 6.51-6.43 (m, 2H), 6.16 (s, 1H), 4.68 (s, 2H), 4.17-4.06 (m, 3H), 2.46 (s, 6H), 2.31 (s, 3H), 2.29 (s, 3H);

**<sup>13</sup>C NMR** (100 MHz, CDCl<sub>3</sub>)  $\delta$  (ppm) 201.3, 146.4, 142.4, 140.2, 137.1, 134.6, 131.9, 130.9, 130.3, 129.4, 128.8, 126.9, 125.2, 118.6, 118.5, 102.8, 96.3, 53.2, 47.1, 22.9, 21.2, 21.0;

**HRMS** (ESI) exact mass calcd. For [C<sub>27</sub>H<sub>28</sub>N<sub>2</sub>O<sub>2</sub>SNa]<sup>+</sup> requires  $m/z$  467.1764, found  $m/z$  467.1765;

$[\alpha]_{25}^D = -25.14$  ( $c = 0.26$ , CHCl<sub>3</sub>);

**HPLC** (Daicel Chirapak OD-H, hexane/ *i*-PrOH = 80/20, flow rate = 1.0 mL/min, T = 25 °C, 254 nm):  $t_R = 8.5$  min (minor),  $t_R = 12.5$  min (major).

**(*R*)-3-(2-([1,1'-biphenyl]-4-yl)vinylidene)-1-(mesitylsulfonyl)-2,3,4,5-tetrahydro-1*H*-benzo[*b*][1,4]diazepine (3c)**

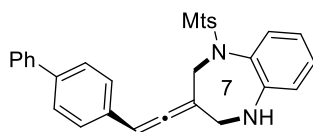

**3c**, 84%, 93% ee

(Flash column chromatography eluent:petroleum ether/EtOAc = 8:1); white solid, 42.6 mg, 84% yield, 93% ee;

**<sup>1</sup>H NMR** (400 MHz, CDCl<sub>3</sub>)  $\delta$  (ppm) 7.56-7.54 (m, 2H), 7.47-7.45 (m, 2H), 7.42-7.38 (m, 2H), 7.33-7.29 (m, 1H), 7.23-7.21 (m, 2H), 6.07-7.02 (m, 1H), 6.93(s, 2H), 6.66-6.64 (m, 1H), 6.51-6.42 (m, 2H), 6.23 (s, 1H), 4.71 (s, 2H), 4.22-4.08 (m, 3H), 2.47 (s, 6H), 2.31 (s, 3H);

**<sup>13</sup>C NMR** (100 MHz, CDCl<sub>3</sub>)  $\delta$  (ppm) 201.7, 146.4, 142.5, 140.7, 140.2, 140.1, 134.6, 133.0, 131.9, 130.3, 128.9, 128.8, 127.5, 127.4, 127.3, 126.9, 125.3, 118.7, 118.6, 103.1, 96.2, 53.2, 47.1, 23.0, 21.0;

**HRMS** (ESI) exact mass calcd. For [C<sub>32</sub>H<sub>30</sub>N<sub>2</sub>O<sub>2</sub>SNa]<sup>+</sup> requires  $m/z$  529.1920, found  $m/z$  529.1919;

$[\alpha]_{25}^D = -94.17$  ( $c = 1.06$ , CHCl<sub>3</sub>);

**HPLC** (Daicel Chirapak OZ-3, hexane/ *i*-PrOH = 60/40, flow rate = 1.5 mL/min, T = 25 °C, 254 nm):  $t_R$  = 5.4 min (major),  $t_R$  = 11.3 min (minor).

**(*R*)-3-(2-(4-chlorophenyl)vinylidene)-1-(mesitylsulfonyl)-2,3,4,5-tetrahydro-1*H*-benzo[*b*][1,4]diazepine (3d)**

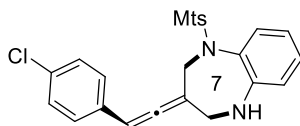

**3d**, 86%, 92% ee

(Flash column chromatography eluent:petroleum ether/EtOAc = 8:1); white solid, 40.0 mg, 86% yield, 92% ee;

**<sup>1</sup>H NMR** (400 MHz, CDCl<sub>3</sub>)  $\delta$  (ppm) 7.19-7.17 (m, 2H), 7.09-7.02 (m, 3H), 6.93 (s, 2H), 6.67-6.65 (m, 1H), 6.51-6.47 (m, 1H), 6.40-6.38 (m, 1H), 6.15 (s, 1H), 4.67 (s, 2H), 4.22-4.06 (m, 3H), 2.46 (s, 6H), 2.31 (s, 3H);

**<sup>13</sup>C NMR** (100 MHz, CDCl<sub>3</sub>)  $\delta$  (ppm) 201.5, 146.4, 142.5, 140.2, 134.5, 132.8, 132.5, 131.9, 130.2, 128.9, 128.8, 128.2, 125.4, 118.8, 103.5, 95.6, 53.0, 47.1, 22.9, 21.0;

**HRMS** (ESI) exact mass calcd. For [C<sub>26</sub>H<sub>25</sub>ClN<sub>2</sub>O<sub>2</sub>SNa]<sup>+</sup> requires  $m/z$  487.1217, found  $m/z$  487.1219;

$[\alpha]_{25}^D = -73.51$  ( $c = 0.87$ , CHCl<sub>3</sub>);

**HPLC** (Daicel Chirapak OZ-3, hexane/ *i*-PrOH = 70/30, flow rate = 1.0 mL/min, T = 25 °C, 254 nm):  $t_R = 6.7$  min (major),  $t_R = 7.6$  min (minor).

**(*R*)-1-(mesitylsulfonyl)-3-(2-(*m*-tolyl)vinylidene)-2,3,4,5-tetrahydro-1*H*-benzo[*b*][1,4]diazepine (3e)**

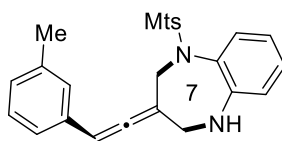

**3e**, 84%, 93% ee

(Flash column chromatography eluent:petroleum ether/EtOAc = 8:1); white solid, 37.4 mg, 84% yield, 93% ee;

**<sup>1</sup>H NMR** (400 MHz, CDCl<sub>3</sub>)  $\delta$  (ppm) 7.13-7.09 (m, 1H), 7.06-7.02 (m, 1H), 6.98-6.93 (m, 5H), 6.66-6.63 (m, 1H), 6.50-6.43 (m, 2H), 6.16 (s, 1H), 4.75-4.64 (m, 2H), 4.16-4.08 (m, 3H), 2.46 (s, 6H), 2.31 (s, 3H), 2.24 (s, 3H);

**<sup>13</sup>C NMR** (100 MHz, CDCl<sub>3</sub>)  $\delta$  (ppm) 201.7, 146.4, 142.4, 140.2, 138.3, 134.6, 133.7, 131.9, 130.4, 129.0, 128.6, 128.1, 127.5, 125.0, 124.2, 118.6, 118.5, 102.7, 96.5, 53.3, 47.0, 22.9, 21.3, 21.0;

**HRMS** (ESI) exact mass calcd. For [C<sub>27</sub>H<sub>28</sub>N<sub>2</sub>O<sub>2</sub>SNa]<sup>+</sup> requires  $m/z$  467.1764, found  $m/z$  467.1766;

$[\alpha]_{25}^D = -38.47$  ( $c = 0.83$ , CHCl<sub>3</sub>);

**HPLC** (Daicel Chirapak OZ-3, hexane/ *i*-PrOH = 70/30, flow rate = 1.0 mL/min, T = 25 °C, 254 nm):  $t_R = 10.8$  min (minor),  $t_R = 16.6$  min (major).

**(*R*)-3-(2-(3-fluorophenyl)vinylidene)-1-(mesitylsulfonyl)-2,3,4,5-tetrahydro-1*H*-benzo[*b*][1,4]diazepine (3f)**

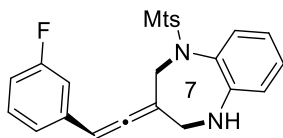

**3f**, 83%, 93% ee

(Flash column chromatography eluent:petroleum ether/EtOAc = 8:1); white solid, 37.3 mg, 83% yield, 93% ee;

**<sup>1</sup>H NMR** (400 MHz, CDCl<sub>3</sub>)  $\delta$  (ppm) 7.20-7.18 (m, 1H), 7.07-7.03 (m, 1H), 6.97-6.94 (m, 3H), 6.87-6.84 (m, 2H), 6.68-6.66 (m, 1H), 6.52-6.48 (m, 1H), 6.43-6.40 (m, 1H), 6.17 (s, 1H), 4.69 (s, 2H), 4.21-4.09 (m, 3H), 2.46 (s, 6H), 2.32 (s, 3H);

**<sup>13</sup>C NMR** (100 MHz, CDCl<sub>3</sub>)  $\delta$  (ppm) 201.5, 163.1 (d,  $J_{C-F}$  = 245.6 Hz), 146.2, 142.5, 140.2, 136.5, 136.4 (d,  $J_{C-F}$  = 7.8 Hz), 131.9, 130.2, 130.0 (d,  $J_{C-F}$  = 8.4 Hz), 128.9, 125.3, 122.7 (d,  $J_{C-F}$  = 2.7 Hz), 118.8, 118.7, 114.1 (d,  $J_{C-F}$  = 21.5 Hz), 113.5 (d,  $J_{C-F}$  = 22.2 Hz), 103.5, 95.9, 95.8, 52.9, 47.0, 22.9, 21.0;

**<sup>19</sup>F NMR** (376 MHz, CDCl<sub>3</sub>)  $\delta$  -113.3;

**HRMS** (ESI) exact mass calcd. For [C<sub>26</sub>H<sub>25</sub>FN<sub>2</sub>O<sub>2</sub>SN<sub>a</sub>]<sup>+</sup> requires  $m/z$  471.1513, found  $m/z$  471.1514;

$[\alpha]_{25}^D$  = -16.37 ( $c$  = 0.39, CHCl<sub>3</sub>);

**HPLC** (Daicel Chirapak OZ-3, hexane/ *i*-PrOH = 65/35, flow rate = 1.0 mL/min, T = 25 °C, 254 nm):  $t_R$  = 7.5 min (minor),  $t_R$  = 9.7 min (major).

**(*R*)-1-(mesitylsulfonyl)-3-(2-(*o*-tolyl)vinylidene)-2,3,4,5-tetrahydro-1*H*-benzo[*b*][1,4]diazepine (3g)**

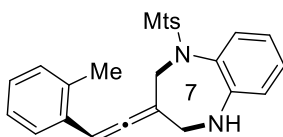

**3g**, 89%, 91% ee

(Flash column chromatography eluent:petroleum ether/EtOAc = 8:1); white solid, 39.6 mg, 89% yield, 91% ee;

**<sup>1</sup>H NMR** (400 MHz, CDCl<sub>3</sub>)  $\delta$  (ppm) 7.16-7.13 (m, 1H), 7.10-7.01 (m, 4H), 6.93 (s, 2H), 6.64-6.62 (m, 1H), 6.50-6.43 (m, 2H), 6.38 (s, 1H), 4.76-4.63 (m, 2H), 4.18-4.13 (m, 3H), 2.46 (s, 6H), 2.31 (s, 3H), 2.28 (s, 3H);

**<sup>13</sup>C NMR** (100 MHz, CDCl<sub>3</sub>)  $\delta$  (ppm) 202.2, 146.3, 142.4, 140.2, 135.3, 134.6, 132.0, 131.9, 130.6, 130.3, 128.9, 127.7, 127.2, 126.2, 125.1, 118.6, 118.5, 101.7, 93.9, 53.2, 47.1, 23.0, 21.0, 19.9;

**HRMS** (ESI) exact mass calcd. For [C<sub>27</sub>H<sub>28</sub>N<sub>2</sub>O<sub>2</sub>SNa]<sup>+</sup> requires  $m/z$  467.1764, found  $m/z$  467.1762;

[ $\alpha$ ]<sub>D</sub><sup>25</sup> = -35.67 ( $c$  = 0.67, CHCl<sub>3</sub>);

**HPLC** (Daicel Chirapak OD-H, hexane/ *i*-PrOH = 70/30, flow rate = 1.0 mL/min, T = 25 °C, 254 nm):  $t_R$  = 11.9 min (major),  $t_R$  = 15.2 min (minor).

**(*R*)-1-(mesitylsulfonyl)-3-(2-(naphthalen-2-yl)vinylidene)-2,3,4,5-tetrahydro-1*H*-benzo[*b*][1,4]diazepine (3h)**

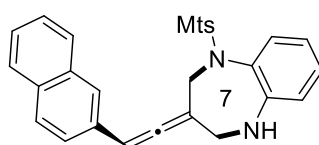

**3h**, 87%, 94% ee

(Flash column chromatography eluent: petroleum ether/EtOAc = 8:1); white solid, 41.8 mg, 87% yield, 94% ee;

**<sup>1</sup>H NMR** (400 MHz, CDCl<sub>3</sub>)  $\delta$  (ppm) 7.75-7.65 (m, 3H), 7.57 (s, 1H), 7.44-7.38 (m, 2H), 7.29-7.26 (m, 1H), 7.10-7.06 (m, 1H), 6.93 (s, 2H), 6.67 (d,  $J$  = 8.1 Hz, 1H), 6.53-6.49 (m, 1H), 6.45-6.42 (m, 1H), 6.36 (s, 1H), 4.74 (s, 2H), 4.24-4.10 (m, 3H), 2.47 (s, 6H), 2.31 (s, 3H);

**<sup>13</sup>C NMR** (100 MHz, CDCl<sub>3</sub>)  $\delta$  (ppm) 202.1, 146.4, 142.5, 140.2, 134.6, 133.6, 132.8, 131.9, 131.4, 130.3, 129.0, 128.3, 127.8, 127.7, 126.2, 125.9, 125.8, 125.1, 124.8, 118.7, 118.6, 103.2, 96.9, 53.2, 47.1, 23.0, 21.0;

**HRMS** (ESI) exact mass calcd. For [C<sub>30</sub>H<sub>28</sub>N<sub>2</sub>O<sub>2</sub>SNa]<sup>+</sup> requires  $m/z$  503.1764, found  $m/z$  503.1765;

[ $\alpha$ ]<sub>D</sub><sup>25</sup> = -62.22 ( $c$  = 0.89, CHCl<sub>3</sub>);

**HPLC** (Daicel Chirapak AD-H, hexane/ *i*-PrOH = 70/30, flow rate = 1.0 mL/min, T = 25 °C, 254 nm):  $t_R$  = 9.6 min (minor),  $t_R$  = 11.9 min (major).

**(*R*)-3-(2-cyclohexylvinylidene)-1-(mesitylsulfonyl)-2,3,4,5-tetrahydro-1*H*-benzo[*b*][1,4]diazepine (3i)**

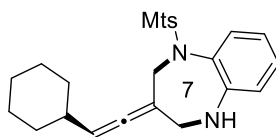

**3i**, 85%, 83% ee

(Flash column chromatography eluent:petroleum ether/EtOAc = 15:1); colorless oily liquid, 37.1 mg, 85% yield, 83% ee;

**<sup>1</sup>H NMR** (500 MHz, CDCl<sub>3</sub>)  $\delta$  (ppm) 7.01-6.97 (m, 1H), 6.91 (s, 2H), 6.61-6.59 (m, 1H), 6.49-6.43 (m, 2H), 5.17-5.16 (m, 1H), 4.54 (s, 2H), 4.11-3.89 (m, 3H), 2.44 (s, 6H), 2.30 (s, 3H), 1.95-1.91 (m, 1H), 1.65-1.56 (m, 5H), 1.25-0.94 (m, 5H);

**<sup>13</sup>C NMR** (125 MHz, CDCl<sub>3</sub>)  $\delta$  (ppm) 199.4, 146.5, 142.2, 140.2, 134.5, 131.8, 130.4, 128.7, 125.1, 118.6, 118.3, 99.5, 99.4, 53.7, 47.4, 37.2, 32.9, 32.8, 26.1, 25.9, 22.9, 21.0;

**HRMS** (ESI) exact mass calcd. For [C<sub>26</sub>H<sub>32</sub>N<sub>2</sub>O<sub>2</sub>SNa]<sup>+</sup> requires  $m/z$  459.2077, found  $m/z$  459.2079;

$[\alpha]_{25}^D = -51.36$  ( $c = 1.02$ , CHCl<sub>3</sub>);

**HPLC** (Daicel Chirapak OZ-3, hexane/ *i*-PrOH = 80/20, flow rate = 1.0 mL/min, T = 25 °C, 254 nm):  $t_R = 6.0$  min (minor),  $t_R = 6.6$  min (major).

**(R)-1-(mesitylsulfonyl)-3-(non-1-en-1-ylidene)-2,3,4,5-tetrahydro-1H-benzo[*b*][1,4]diazepine (3j)**

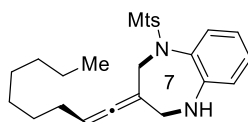

**3j**, 86%, 72% ee

(Flash column chromatography eluent:petroleum ether/EtOAc = 20:1); colorless oily liquid, 39.0 mg, 86% yield, 72% ee;

**<sup>1</sup>H NMR** (400 MHz, CDCl<sub>3</sub>)  $\delta$  (ppm) 7.01-6.97 (m, 1H), 6.91 (s, 2H), 6.61-6.59 (m, 1H), 6.51-6.43 (m, 2H), 5.19-5.16 (m, 1H), 4.54 (s, 2H), 4.10-3.89 (m, 3H), 2.45 (s, 6H), 2.30 (s, 3H), 1.94 (q,  $J = 13.9, 6.8$  Hz, 2H), 1.30-1.22 (m, 10H), 0.87 (t,  $J = 6.9$  Hz, 3H);

**<sup>13</sup>C NMR** (100 MHz, CDCl<sub>3</sub>)  $\delta$  (ppm) 200.1, 146.4, 142.2, 140.2, 134.6, 131.8, 130.4, 128.7, 125.2, 118.5, 118.3, 98.6, 93.4, 53.5, 47.4, 31.9, 29.1, 29.0, 28.9, 28.6, 22.9, 22.7, 21.0, 14.1;

**HRMS** (ESI) exact mass calcd. For [C<sub>27</sub>H<sub>36</sub>N<sub>2</sub>O<sub>2</sub>SNa]<sup>+</sup> requires  $m/z$  475.2390, found  $m/z$  475.2387;

$[\alpha]_{25}^D = -40.92$  ( $c = 1.09$ ,  $\text{CHCl}_3$ );

**HPLC** (Daicel Chirapak OZ-3, hexane/ *i*-PrOH = 85:15, flow rate = 1.0 mL/min, T = 25 °C, 254 nm):  $t_R = 6.3$  min (minor),  $t_R = 7.0$  min (major).

**(*R*)-1-(mesitylsulfonyl)-7,8-dimethyl-3-(2-phenylvinylidene)-2,3,4,5-tetrahydro-1*H*-benzo[*b*][1,4]diazepine (3k)**

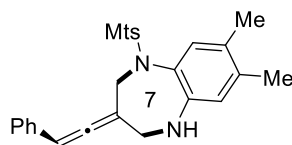

**3k**, 80%, 90% ee

(Flash column chromatography eluent:petroleum ether/EtOAc = 8:1); white solid, 36.7 mg, 80% yield, 90% ee;

**$^1\text{H}$  NMR** (500 MHz,  $\text{CDCl}_3$ )  $\delta$  (ppm) 7.25-7.21 (m, 2H), 7.17-7.15 (m, 3H), 6.94 (s, 2H), 6.48 (s, 1H), 6.22 (s, 1H), 6.16 (s, 1H), 4.63-4.54 (m, 2H), 4.16-3.95 (m, 3H), 2.47 (s, 6H), 2.32 (s, 3H), 2.13 (s, 3H), 1.90 (s, 3H);

**$^{13}\text{C}$  NMR** (100 MHz,  $\text{CDCl}_3$ )  $\delta$  (ppm) 201.5, 143.8, 142.3, 140.3, 137.2, 134.6, 134.0, 131.8, 130.8, 128.6, 127.3, 127.2, 127.1, 123.7, 120.3, 103.1, 96.1, 52.9, 47.5, 23.0, 21.0, 19.4, 18.4;

**HRMS** (ESI) exact mass calcd. For  $[\text{C}_{28}\text{H}_{30}\text{N}_2\text{O}_2\text{SNa}]^+$  requires  $m/z$  481.1920, found  $m/z$  481.1920;

$[\alpha]_{25}^D = -62.99$  ( $c = 1.34$ ,  $\text{CHCl}_3$ );

**HPLC** (Daicel Chirapak OZ-3, hexane/ *i*-PrOH = 70/30, flow rate = 1.0 mL/min, T = 25 °C, 254 nm):  $t_R = 10.1$  min (minor),  $t_R = 15.2$  min (major).

**(*R*)-7,8-difluoro-1-(mesitylsulfonyl)-3-(2-phenylvinylidene)-2,3,4,5-tetrahydro-1*H*-benzo[*b*][1,4]diazepine (3l)**

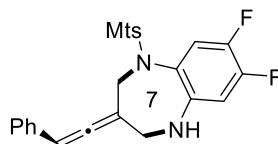

**3l**, 80%, 92% ee

(Flash column chromatography eluent:petroleum ether/EtOAc = 8:1); white solid, 37.4 mg, 80% yield, 92% ee;

**<sup>1</sup>H NMR** (500 MHz, CDCl<sub>3</sub>)  $\delta$  (ppm) 7.27-7.24 (m, 2H), 7.20-7.15 (m, 3H), 6.97 (s, 2H), 6.45 (dd,  $J = 11.7, 7.6$  Hz, 1H), 6.29-6.25 (m, 1H), 6.21 (s, 1H), 4.64 (s, 2H), 4.14-4.03 (m, 3H), 2.48 (s, 6H), 2.33 (s, 3H);

**<sup>13</sup>C NMR** (100 MHz, CDCl<sub>3</sub>)  $\delta$  (ppm) 201.6, 150.1 (dd,  $J_{C-F} = 248.4, 13.7$  Hz), 143.8, 143.5 (d,  $J_{C-F} = 8.4$  Hz), 143.0, 140.2, 133.7, 133.6, 132.1, 128.7, 127.4, 127.0, 118.7 (dd,  $J_{C-F} = 18.3, 2.2$  Hz), 106.3 (d,  $J_{C-F} = 20.4$  Hz), 102.3, 96.8, 53.1, 46.9, 22.9, 21.0;

**<sup>19</sup>F NMR** (376 MHz, CDCl<sub>3</sub>)  $\delta$  -136.6, -149.3;

**HRMS** (ESI) exact mass calcd. For [C<sub>26</sub>H<sub>24</sub>F<sub>2</sub>N<sub>2</sub>O<sub>2</sub>SNa]<sup>+</sup> requires  $m/z$  489.1419, found  $m/z$  489.1420;

$[\alpha]_{25}^D = -29.03$  ( $c = 0.73$ , CHCl<sub>3</sub>);

**HPLC** (Daicel Chirapak OZ-3, hexane/ *i*-PrOH = 70/30, flow rate = 1.0 mL/min, T = 25 °C, 254 nm):  $t_R = 5.6$  min (minor),  $t_R = 6.9$  min (major).

**(*R*)-7,8-dichloro-1-(mesitylsulfonyl)-3-(2-phenylvinylidene)-2,3,4,5-tetrahydro-1*H*-benzo[*b*][1,4]diazepine (3m)**

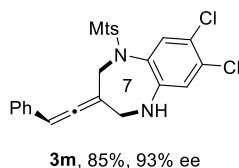

(Flash column chromatography eluent:petroleum ether/EtOAc = 8:1); white solid, 42.4 mg, 85% yield, 93% ee;

**<sup>1</sup>H NMR** (500 MHz, CDCl<sub>3</sub>)  $\delta$  (ppm) 7.27-7.14 (m, 5H), 6.99 (s, 2H), 6.74 (s, 1H), 6.47 (s, 1H), 6.22 (s, 1H), 4.65 (s, 2H), 4.24-4.06 (m, 3H), 2.49 (s, 6H), 2.34 (s, 3H);

**<sup>13</sup>C NMR** (150 MHz, CDCl<sub>3</sub>)  $\delta$  (ppm) 201.6, 145.7, 143.1, 140.2, 133.7, 133.5, 132.2, 132.1, 131.5, 128.7, 128.6, 127.5, 127.0, 126.4, 124.4, 120.3, 118.9, 102.0, 97.0, 53.0, 46.6, 23.0, 21.0;

**HRMS** (ESI) exact mass calcd. For [C<sub>26</sub>H<sub>24</sub>Cl<sub>2</sub>N<sub>2</sub>O<sub>2</sub>SNa]<sup>+</sup> requires  $m/z$  521.0828, found  $m/z$  521.0829;

$[\alpha]_{25}^D = -34.21$  ( $c = 0.67$ , CHCl<sub>3</sub>);

**HPLC** (Daicel Chirapak OZ-3, hexane/ *i*-PrOH = 70:30, flow rate = 1.0 mL/min, T = 25 °C, 254 nm):  $t_R = 4.7$  min (minor),  $t_R = 5.9$  min (major).

**(*R*)-7,8-dibromo-1-(mesitylsulfonyl)-3-(2-phenylvinylidene)-2,3,4,5-tetrahydro-1*H*-benzo[*b*][1,4]diazepine (3n)**

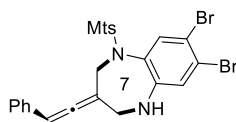

**3n**, 85%, 93% ee

(Flash column chromatography eluent:petroleum ether/EtOAc = 8:1); white solid, 50.0 mg, 85% yield, 93% ee;

**<sup>1</sup>H NMR** (600 MHz, CDCl<sub>3</sub>)  $\delta$  (ppm) 7.25-7.24 (m, 2H), 7.20-7.17 (m, 1H), 7.14-7.13 (m, 2H), 6.98 (s, 2H), 6.90 (s, 1H), 6.56 (s, 1H), 6.22 (s, 1H), 4.64 (s, 2H), 4.26 (s, 1H), 4.17-4.05 (m, 2H), 2.48 (s, 6H), 2.33 (s, 3H);

**<sup>13</sup>C NMR** (150 MHz, CDCl<sub>3</sub>)  $\delta$  (ppm) 201.6, 146.3, 143.1, 140.3, 134.6, 133.6, 133.5, 132.1, 128.7, 127.5, 127.0, 125.2, 124.3, 122.1, 110.9, 102.0, 97.0, 53.0, 46.6, 23.0, 21.0;

**HRMS** (ESI) exact mass calcd. For [C<sub>26</sub>H<sub>24</sub>Br<sub>2</sub>N<sub>2</sub>O<sub>2</sub>SNa]<sup>+</sup> requires  $m/z$  608.9817, found  $m/z$  608.9815;

[ $\alpha$ ]<sub>D</sub><sup>25</sup> = -84.10 ( $c$  = 1.33, CHCl<sub>3</sub>);

**HPLC** (Daicel Chirapak OZ-3, hexane/ *i*-PrOH = 70/30, flow rate = 1.0 mL/min, T = 25 °C, 254 nm):  $t_R$  = 5.0 min (minor),  $t_R$  = 6.6 min (major). Absolute configuration is confirmed by X-ray.

**Melting range:** 176.4-177.3 °C.

**(*R*)-1-(mesitylsulfonyl)-3-(2-phenylvinylidene)-2,3,4,5-tetrahydro-1*H*-naphtho[2,3-*b*][1,4]diazepine (3o)**

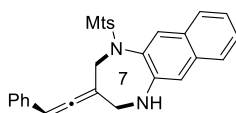

**3o**, 71%, 93% ee

(Flash column chromatography eluent:petroleum ether/EtOAc = 8:1); white solid, 34.1 mg, 71% yield, 93% ee;

**<sup>1</sup>H NMR** (500 MHz, CDCl<sub>3</sub>)  $\delta$  (ppm) 7.56 (d,  $J$  = 8.3 Hz, 1H), 7.37-7.34 (m, 2H), 7.19-7.16 (m, 1H), 7.09-7.01 (m, 7H), 6.95 (s, 2H), 6.17 (s, 1H), 4.70-4.61 (m, 2H), 4.30 (s, 1H), 4.15-4.05 (m, 2H), 2.47 (s, 6H), 2.33 (s, 3H);

**<sup>13</sup>C NMR** (150 MHz, CDCl<sub>3</sub>)  $\delta$  (ppm) 202.0, 144.5, 142.6, 140.3, 134.3, 133.9, 133.7, 132.0, 129.2, 128.6, 128.6, 128.5, 128.1, 127.6, 127.2, 127.0, 126.9, 125.5, 123.2, 113.8, 102.5, 96.3, 53.0, 47.9, 23.0, 21.0;

**HRMS** (ESI) exact mass calcd. For  $[C_{30}H_{28}N_2O_2SNa]^+$  requires  $m/z$  503.1764, found  $m/z$  503.1763;

$[\alpha]_{25}^D = -48.37$  ( $c = 0.89$ ,  $CHCl_3$ );

**HPLC** (Daicel Chirapak OZ-3, hexane/ *i*-PrOH = 70/30, flow rate = 1.0 mL/min, T = 25 °C, 254 nm):  $t_R = 7.5$  min (minor),  $t_R = 9.7$  min (major).

#### Spectral data of products 4

**(S)-2-(((N-(2-aminophenyl)-2,4,6-trimethylphenyl)sulfonamido)methyl)-4-phenylbuta-2,3-dien-1-yl methyl carbonate (4a)**

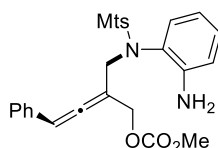

**4a**, 75%, 90% ee

(Flash column chromatography eluent:petroleum ether/EtOAc = 8:1); yellow oily liquid, 30.3 mg, 75% yield, 90% ee;

**$^1H$  NMR** (400 MHz,  $CDCl_3$ )  $\delta$  (ppm) 7.18-7.07 (m, 4H), 6.91-6.87 (m, 3H), 6.79-6.57 (m, 3H), 6.50-6.39 (m, 1H), 6.07 (m, 1H), 5.11-4.68 (m, 3H), 4.35-4.06 (m, 3H), 3.77-3.73 (m, 3H), 2.40-2.36 (m, 6H), 2.27 (s, 3H);

**$^{13}C$  NMR** (100 MHz,  $CDCl_3$ )  $\delta$  (ppm) 206.2, 205.9, 155.5, 155.4, 146.9, 146.5, 142.6, 142.6, 140.3, 132.8, 132.6, 132.5, 132.3, 132.1, 131.2, 129.9, 129.6, 129.5, 128.5, 128.4, 127.4, 127.3, 127.2, 123.4, 123.1, 118.8, 118.5, 117.3, 117.2, 99.8, 99.7, 97.0, 65.9, 65.7, 55.0, 51.5, 49.4, 23.5, 23.4, 21.0;

**HRMS** (ESI) exact mass calcd. For  $[C_{28}H_{30}N_2O_5SNa]^+$  requires  $m/z$  529.1768, found  $m/z$  529.1767;

$[\alpha]_{25}^D = -127.8$  ( $c = 1.31$ ,  $CHCl_3$ );

**HPLC** (Daicel Chirapak OD-H, hexane/ *i*-PrOH = 70/30, flow rate = 1.0 mL/min, T = 25 °C, 254 nm):  $t_R = 7.2$  min (major),  $t_R = 8.9$  min (minor).

**(S)-2-(((N-(2-amino-4,5-dimethylphenyl)-2,4,6-trimethylphenyl)sulfonamido)methyl)-4-phenylbuta-2,3-dien-1-yl methyl carbonate (4b)**

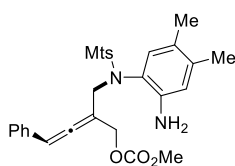

**4b**, 73%, 85% ee

(Flash column chromatography eluent:petroleum ether/EtOAc = 8:1); yellow oily liquid, 39.1 mg, 73% yield, 85% ee;

**<sup>1</sup>H NMR** (600 MHz, CDCl<sub>3</sub>)  $\delta$  (ppm) 7.14-7.05 (m, 3H), 6.88-6.86 (m, 3H), 6.71-6.70 (m, 1H), 6.57-6.51 (m, 1H), 6.44-6.19 (m, 1H), 6.12-6.06 (m, 1H), 5.05-4.68 (m, 3H), 4.58-4.33 (m, 1H), 4.05-4.03 (m, 2H), 3.76-3.71 (m, 3H), 2.43-2.36 (m, 6H), 2.26 (s, 3H), 2.15-2.13 (m, 3H), 2.01-1.67 (m, 3H);

**<sup>13</sup>C NMR** (150 MHz, CDCl<sub>3</sub>)  $\delta$  (ppm) 206.0, 205.9, 155.5, 155.4, 144.3, 143.7, 142.5, 142.4, 140.3, 138.0, 137.8, 133.0, 132.8, 132.5, 131.9, 130.3, 128.4, 128.2, 127.3, 127.2, 126.9, 126.6, 121.0, 118.8, 118.6, 100.0, 97.1, 65.9, 65.7, 54.9, 51.0, 49.0, 23.5, 23.4, 20.9, 19.6, 18.5, 18.2;

**HRMS** (ESI) exact mass calcd. For [C<sub>30</sub>H<sub>34</sub>N<sub>2</sub>O<sub>5</sub>SNa]<sup>+</sup> requires  $m/z$  557.2081, found  $m/z$  557.2083;

[ $\alpha$ ]<sub>D</sub><sup>25</sup> = -37.20 ( $c$  = 0.97, CHCl<sub>3</sub>);

**HPLC** (Daicel Chirapak OD-H, hexane/ *i*-PrOH = 70/30, flow rate = 1.0 mL/min, T = 25 °C, 254 nm):  $t_R$  = 9.5 min (major),  $t_R$  = 13.5 min (minor).

**(S)-2-(((N-(2-amino-4,5-difluorophenyl)-2,4,6-trimethylphenyl)sulfonamido)methyl)-4-phenylbuta-2,3-dien-1-yl methyl carbonate (4c)**

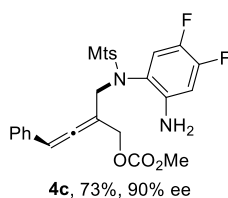

(Flash column chromatography eluent:petroleum ether/EtOAc = 8:1); yellow oily liquid, 39.6 mg, 73% yield, 90% ee;

**<sup>1</sup>H NMR** (500 MHz, CDCl<sub>3</sub>)  $\delta$  (ppm) 7.26-7.16 (m, 3H), 6.97-6.90 (m, 3H), 6.80 (s, 1H), 6.62-6.53 (m, 1H), 6.42-6.31 (m, 1H), 6.16-6.10 (m, 1H), 5.01-4.60 (m, 3H), 4.28-3.98 (m, 3H), 3.77-3.73 (m, 3H), 2.43-2.40 (m, 6H), 2.28 (s, 3H);

**<sup>13</sup>C NMR** (125 MHz, CDCl<sub>3</sub>)  $\delta$  (ppm) 206.1, 206.0, 155.5, 151.8, 151.7, 149.8, 149.7, 144.2, 143.7, 143.1, 140.2, 132.4, 132.2, 131.8, 131.7, 128.5, 127.7, 127.1, 127.0, 119.6, 119.5, 118.4, 104.8, 104.6, 99.4, 97.4, 65.8, 65.6, 54.9, 51.3, 49.5, 23.4, 23.4, 20.9;

**<sup>19</sup>F NMR** (470 MHz, CDCl<sub>3</sub>)  $\delta$  -135.0, -135.1, -135.2, -149.2, -149.3, -149.5, -149.6;

**HRMS** (ESI) exact mass calcd. For [C<sub>28</sub>H<sub>28</sub>F<sub>2</sub>N<sub>2</sub>O<sub>5</sub>SNa]<sup>+</sup> requires  $m/z$  565.1579, found  $m/z$  565.1577;

$[\alpha]_{25}^D = -57.68$  ( $c = 0.78$ ,  $\text{CHCl}_3$ );

**HPLC** (Daicel Chirapak OD-H, hexane/ *i*-PrOH = 80/20, flow rate = 1.0 mL/min, T = 25 °C, 254 nm):  $t_R = 12.3$  min (major),  $t_R = 16.0$  min (minor).

**(S)-2-(((N-(2-aminophenyl)-2,4,6-trimethylphenyl)sulfonamido)methyl)-4-(p-tolyl)buta-2,3-dien-1-yl methyl carbonate (4d)**

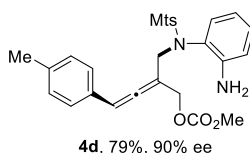

(Flash column chromatography eluent:petroleum ether/EtOAc = 8:1); yellow oily liquid, 41.1 mg, 79% yield, 90% ee;

**$^1\text{H}$  NMR** (500 MHz,  $\text{CDCl}_3$ )  $\delta$  (ppm) 7.08 (t,  $J = 7.6$  Hz, 1H), 6.98 (d,  $J = 7.6$  Hz, 1H), 6.91 (d,  $J = 7.7$  Hz, 1H), 6.86 (s, 2H), 6.81-6.58 (m, 4H), 6.51-6.42 (m, 1H), 6.09-6.00 (m, 1H), 5.06-4.66 (m, 3H), 4.33-4.06 (m, 3H), 3.76-3.72 (m, 3H), 2.40-2.36 (m, 6H), 2.28-2.26 (m, 6H);

**$^{13}\text{C}$  NMR** (125 MHz,  $\text{CDCl}_3$ )  $\delta$  (ppm) 206.1, 205.8, 155.5, 155.4, 146.9, 146.5, 142.5, 140.3, 137.3, 137.1, 132.6, 132.5, 132.0, 131.2, 130.1, 129.8, 129.6, 129.5, 129.5, 129.2, 129.1, 127.1, 123.5, 123.2, 118.7, 118.5, 117.3, 117.1, 99.6, 99.5, 96.9, 66.0, 65.8, 54.9, 51.5, 49.5, 23.5, 23.3, 21.2, 20.9;

**HRMS** (ESI) exact mass calcd. For  $[\text{C}_{29}\text{H}_{32}\text{N}_2\text{O}_5\text{SNa}]^+$  requires  $m/z$  543.1924, found  $m/z$  543.1924;

$[\alpha]_{25}^D = -64.84$  ( $c = 0.86$ ,  $\text{CHCl}_3$ );

**HPLC** (Daicel Chirapak AS-H, hexane/ *i*-PrOH = 80/20, flow rate = 1.0 mL/min, T = 25 °C, 254 nm):  $t_R = 10.6$  min (minor),  $t_R = 16.1$  min (major).

**(S)-2-(((N-(2-aminophenyl)-2,4,6-trimethylphenyl)sulfonamido)methyl)-4-cyclohexylbuta-2,3-dien-1-yl methyl carbonate (4e)**

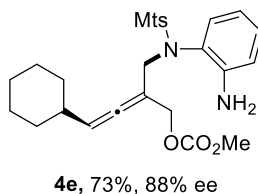

(Flash column chromatography eluent:petroleum ether/EtOAc = 8:1); yellow oily liquid, 37.4 mg, 73% yield, 88% ee;

**<sup>1</sup>H NMR** (600 MHz, CDCl<sub>3</sub>)  $\delta$  (ppm) 7.03-7.01 (m, 1H), 6.87 (s, 2H), 6.68-6.49 (m, 3H), 5.05-4.48 (m, 4H), 4.23-3.90 (m, 3H), 3.79-3.77 (m, 3H), 2.41-2.35 (m, 6H), 2.27 (s, 3H), 1.67-0.60 (m, 11H);

**<sup>13</sup>C NMR** (150 MHz, CDCl<sub>3</sub>)  $\delta$  (ppm) 204.3, 155.6, 147.1, 146.6, 142.4, 140.2, 132.9, 132.7, 131.9, 131.6, 130.1, 129.3, 123.6, 123.2, 118.2, 116.9, 99.4, 96.0, 66.6, 54.7, 52.1, 49.8, 36.9, 32.7, 32.5, 32.3, 25.8, 23.4, 23.3, 20.9;

**HRMS** (ESI) exact mass calcd. For [C<sub>28</sub>H<sub>36</sub>N<sub>2</sub>O<sub>5</sub>SNa]<sup>+</sup> requires  $m/z$  535.2237, found  $m/z$  535.2237;

$[\alpha]_{25}^D = -29.44$  ( $c = 0.84$ , CHCl<sub>3</sub>);

**HPLC** (Daicel Chirapak AD-H, hexane/ *i*-PrOH = 95/5, flow rate = 1.0 mL/min, T = 25 °C, 254 nm):  $t_R = 36.7$  min (minor),  $t_R = 47.7$  min (major).

**(S)-methyl(2-(((4-methyl-N-phenylphenyl)sulfonamido)methyl)-4-phenylbuta-2,3-dien-1-yl) carbonate (4f)**

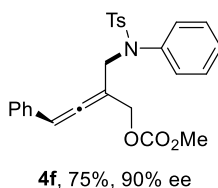

(Flash column chromatography eluent:petroleum ether/EtOAc = 8:1); white solid, 34.8 mg, 75% yield, 90% ee;

**<sup>1</sup>H NMR** (500 MHz, CDCl<sub>3</sub>)  $\delta$  (ppm) 7.46 (d,  $J = 8.3$  Hz, 2H), 7.30-7.21 (m, 5H), 7.13-7.05 (m, 5H), 6.76-6.74 (m, 2H), 6.12-6.11 (m, 1H), 4.79-4.78 (m, 2H), 4.51-4.48 (m, 1H), 4.21-4.18 (m, 1H), 3.73 (s, 3H), 2.40 (s, 3H);

**<sup>13</sup>C NMR** (125 MHz, CDCl<sub>3</sub>)  $\delta$  (ppm) 205.4, 155.4, 143.6, 138.6, 134.9, 132.5, 129.5, 129.1, 128.8, 128.4, 128.0, 127.8, 127.4, 127.3, 127.1, 99.6, 97.6, 65.4, 54.9, 50.8, 21.5;

**HRMS** (ESI) exact mass calcd. For [C<sub>26</sub>H<sub>25</sub>NO<sub>5</sub>SNa]<sup>+</sup> requires  $m/z$  486.1346, found  $m/z$  486.1345;

$[\alpha]_{25}^D = -19.25$  ( $c = 0.86$ , CHCl<sub>3</sub>);

**HPLC** (Daicel Chirapak OD-H, hexane/ *i*-PrOH = 75/25, flow rate = 1.0 mL/min, T = 25 °C, 254 nm):  $t_R = 9.1$  min (major),  $t_R = 10.6$  min (minor). Absolute configuration is confirmed by X-ray.

**Melting range:**79.6-80.3 °C.

### Spectral data of products 9

#### (*R*)-5-((3,5-bis(trifluoromethyl)phenyl)sulfonyl)-3-(2-phenylvinylidene)-2,3,4,5-tetrahydrobenzo[*b*][1,4]oxazepine (**9a**)

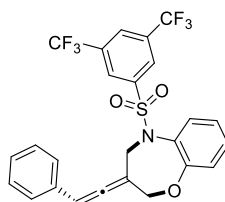

**9a**, 87%, 90% ee

(Flash column chromatography eluent:petroleum ether/EtOAc = 12:1); white solid, 45.7 mg, 87% yield, 90% ee;

**<sup>1</sup>H NMR** (400 MHz, CDCl<sub>3</sub>)  $\delta$  (ppm) 8.04 (s, 1H), 7.97 (s, 2H), 7.62-7.59 (m, 1H), 7.39-7.35 (m, 1H), 7.28-7.20 (m, 4H), 7.01-6.95 (m, 3H), 6.31 (s, 1H), 4.84 (d,  $J$  = 14.4 Hz, 1H), 4.35 (d,  $J$  = 12.3 Hz, 1H), 4.22-4.14 (m, 2H);

**<sup>13</sup>C NMR** (100 MHz, CDCl<sub>3</sub>)  $\delta$  (ppm) 204.5, 155.7, 141.7, 132.4 (d,  $J_{C-F}$  = 3.0 Hz), 132.0, 131.1, 130.8, 128.8, 128.1 (d,  $J_{C-F}$  = 3.1 Hz), 127.9, 127.1, 126.1 (t,  $J_{C-F}$  = 3.4 Hz), 125.3, 123.9 (d,  $J_{C-F}$  = 273.5 Hz), 122.7, 98.8, 96.3, 72.6, 52.2;

**<sup>19</sup>F NMR** (376 MHz, CDCl<sub>3</sub>)  $\delta$  -62.9;

**HRMS** (ESI) exact mass calcd. For [C<sub>25</sub>H<sub>17</sub>F<sub>6</sub>NO<sub>3</sub>SN<sub>a</sub>]<sup>+</sup> requires  $m/z$  548.0726, found  $m/z$  548.0725;

**$[\alpha]_{25}^D$**  = 231.88 ( $c$  = 1.53, CHCl<sub>3</sub>);

**HPLC** (Daicel Chirapak ID, hexane/ *i*-PrOH = 90/10, flow rate = 1.0 mL/min, T = 25 °C, 254 nm):  $t_R$  = 4.5 min (minor),  $t_R$  = 5.0 min (major). Absolute configuration is confirmed by X-ray.

**Melting range**:144.5-144.7 °C.

#### (*R*)-5-((3,5-bis(trifluoromethyl)phenyl)sulfonyl)-7-methyl-3-(2-phenylvinylidene)-2,3,4,5-tetrahydrobenzo[*b*][1,4]oxazepine (**9b**)

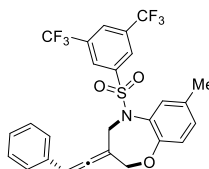

**9b**, 80%, 92% ee

(Flash column chromatography eluent:petroleum ether/EtOAc = 12:1); white solid, 43.1 mg, 80% yield, 92% ee;

**<sup>1</sup>H NMR** (400 MHz, CDCl<sub>3</sub>)  $\delta$  (ppm) 8.03 (s, 1H), 7.99 (s, 2H), 7.40-7.39 (m, 1H), 7.26-7.14 (m, 4H), 7.01-6.98 (m, 2H), 6.84 (d,  $J$  = 8.2 Hz, 1H), 6.29 (s, 1H), 4.81 (d,  $J$  = 14.4 Hz, 1H), 4.31 (d,  $J$  = 12.3 Hz, 1H), 4.19-4.09 (m, 2H), 2.41 (s, 3H);

**<sup>13</sup>C NMR** (100 MHz, CDCl<sub>3</sub>)  $\delta$  (ppm) 204.5, 153.4, 141.9, 135.2, 132.6 (q,  $J_{C-F}$  = 34.4 Hz), 132.5, 132.2, 131.3, 130.8, 128.7, 128.1 (d,  $J_{C-F}$  = 3.1 Hz), 127.8, 127.1, 126.0 (t,  $J_{C-F}$  = 3.7 Hz), 124.0 (d,  $J_{C-F}$  = 273.2 Hz), 122.3, 98.9, 96.1, 72.7, 52.2, 20.8;

**<sup>19</sup>F NMR** (376 MHz, CDCl<sub>3</sub>)  $\delta$  -62.9;

**HRMS** (ESI) exact mass calcd. For [C<sub>26</sub>H<sub>19</sub>F<sub>6</sub>NO<sub>3</sub>SNa]<sup>+</sup> requires  $m/z$  562.0882, found  $m/z$  562.0880;

$[\alpha]_{25}^D$  = 130.92 ( $c$  = 1.01, CHCl<sub>3</sub>);

**HPLC** (Daicel Chirapak ID, hexane/ *i*-PrOH = 90/10, flow rate = 1.0 mL/min, T = 25 °C, 254 nm):  $t_R$  = 12.0 min (minor),  $t_R$  = 12.8 min (major).

**(*R*)-5-((3,5-bis(trifluoromethyl)phenyl)sulfonyl)-7-methoxy-3-(2-phenylvinylidene)-2,3,4,5-tetrahydrobenzo[*b*][1,4]oxazepine (9c)**

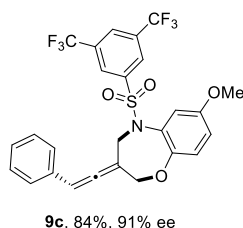

(Flash column chromatography eluent:petroleum ether/EtOAc = 12:1); white solid, 46.6 mg, 84% yield, 91% ee;

**<sup>1</sup>H NMR** (400 MHz, CDCl<sub>3</sub>)  $\delta$  (ppm) 8.04 (s, 1H), 8.00 (s, 2H), 7.27-7.21 (m, 3H), 7.13 (d,  $J$  = 2.8 Hz, 1H), 7.01-6.99 (m, 2H), 6.92-6.86 (m, 2H), 6.29 (s, 1H), 4.80 (d,  $J$  = 14.2 Hz, 1H), 4.29 (d,  $J$  = 12.3 Hz, 1H), 4.20-4.16 (m, 1H), 4.10-4.07 (m, 1H), 3.86 (s, 3H);

**<sup>13</sup>C NMR** (100 MHz, CDCl<sub>3</sub>)  $\delta$  (ppm) 204.5, 156.6, 149.3, 141.6, 132.6 (q,  $J_{C-F}$  = 34.2 Hz), 132.4, 131.8, 128.8, 128.1 (d,  $J_{C-F}$  = 3.1 Hz), 127.9, 127.1, 126.1 (t,  $J_{C-F}$  = 3.6 Hz), 124.0 (q,  $J_{C-F}$  = 273.1 Hz), 123.1, 116.7, 116.2, 98.9, 96.1, 72.8, 55.9, 52.3;

**<sup>19</sup>F NMR** (376 MHz, CDCl<sub>3</sub>)  $\delta$  -62.9;

**HRMS** (ESI) exact mass calcd. For [C<sub>26</sub>H<sub>19</sub>F<sub>6</sub>NO<sub>4</sub>SNa]<sup>+</sup> requires  $m/z$  578.0831, found  $m/z$  578.0831;

$[\alpha]_{25}^D$  = 142.48 ( $c$  = 1.03, CHCl<sub>3</sub>);

**HPLC** (Daicel Chirapak ID, hexane/ *i*-PrOH = 90/10, flow rate = 1.0 mL/min, T = 25 °C, 254 nm):  $t_R$  = 4.8 min (minor),  $t_R$  = 5.1 min (major).

**(R)-5-((3,5-bis(trifluoromethyl)phenyl)sulfonyl)-7-chloro-3-(2-phenylvinylidene)-2,3,4,5-tetrahydrobenzo[b][1,4]oxazepine (9d)**

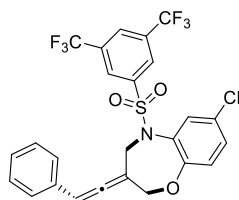

**9d**, 95%, 82% ee

(Flash column chromatography eluent:petroleum ether/EtOAc = 12:1); white solid, 53.2 mg, 95% yield, 82% ee;

**<sup>1</sup>H NMR** (500 MHz, CDCl<sub>3</sub>)  $\delta$  (ppm) 8.06 (s, 1H), 8.02 (s, 2H), 7.61 (d,  $J$  = 2.5 Hz, 1H), 7.35-7.33 (m, 1H), 7.27-7.20 (m, 3H), 6.98-6.97 (m, 2H), 6.91 (d,  $J$  = 8.6 Hz, 1H), 6.31 (s, 1H), 4.78 (d,  $J$  = 14.3 Hz, 1H), 4.34 (d,  $J$  = 12.3 Hz, 1H), 4.22-4.14 (m, 2H);

**<sup>13</sup>C NMR** (125 MHz, CDCl<sub>3</sub>)  $\delta$  (ppm) 204.9, 154.1, 141.6, 132.8 (d,  $J_{C-F}$  = 34.1 Hz), 132.1 (d,  $J_{C-F}$  = 2.5 Hz), 131.8, 130.7, 130.0, 128.8, 128.0, 127.1, 126.3 (t,  $J_{C-F}$  = 3.2 Hz), 125.8 (q,  $J_{C-F}$  = 272.6 Hz), 123.7, 98.4, 96.6, 72.8, 52.2;

**<sup>19</sup>F NMR** (470 MHz, CDCl<sub>3</sub>)  $\delta$  -62.9;

**HRMS** (ESI) exact mass calcd. For [C<sub>25</sub>H<sub>16</sub>ClF<sub>6</sub>NO<sub>3</sub>SNa]<sup>+</sup> requires  $m/z$  582.0336, found  $m/z$  582.0334;

$[\alpha]_{25}^D$  = 98.21 ( $c$  = 1.03, CHCl<sub>3</sub>);

**HPLC** (Daicel Chirapak ID, hexane/ *i*-PrOH = 95/5, flow rate = 1.0 mL/min, T = 25 °C, 254 nm):  $t_R$  = 5.3 min (minor),  $t_R$  = 6.2 min (major).

**(R)-5-((3,5-bis(trifluoromethyl)phenyl)sulfonyl)-8-methyl-3-(2-phenylvinylidene)-2,3,4,5-tetrahydrobenzo[b][1,4]oxazepine (9e)**

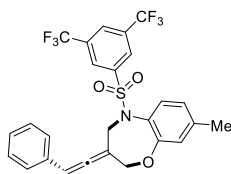

**9e**, 82%, 89% ee

(Flash column chromatography eluent:petroleum ether/EtOAc = 12:1); white solid, 44.2 mg, 82% yield, 89% ee;

**<sup>1</sup>H NMR** (600 MHz, CDCl<sub>3</sub>)  $\delta$  (ppm) 8.03 (s, 1H), 7.98 (s, 2H), 7.46 (d,  $J$  = 8.0 Hz, 1H), 7.25-7.21 (m, 3H), 7.07-7.01 (m, 3H), 6.76 (s, 1H), 6.30 (s, 1H), 4.83 (d,  $J$  = 14.3 Hz, 1H), 4.32 (d,  $J$  = 12.3 Hz, 1H), 4.18-4.12 (m, 2H), 2.36 (s, 3H);

**<sup>13</sup>C NMR** (100 MHz, CDCl<sub>3</sub>)  $\delta$  (ppm) 204.4, 155.5, 141.8 (d,  $J_{C-F}$  = 29.8 Hz), 132.5, 132.3 (q,  $J_{C-F}$  = 33.9 Hz), 131.5, 128.8, 128.2, 128.1, 127.8, 127.1, 126.0 (d,  $J_{C-F}$  = 7.7 Hz), 124.0 (d,  $J_{C-F}$  = 274.7 Hz), 123.0, 99.0, 96.1, 72.6, 52.2, 21.1;

**<sup>19</sup>F NMR** (376 MHz, CDCl<sub>3</sub>)  $\delta$  -62.9;

**HRMS** (ESI) exact mass calcd. For [C<sub>26</sub>H<sub>19</sub>F<sub>6</sub>NO<sub>3</sub>SNa]<sup>+</sup> requires  $m/z$  562.0882, found  $m/z$  562.0884;

$[\alpha]_{25}^D$  = 95.17 ( $c$  = 1.23, CHCl<sub>3</sub>);

**HPLC** (Daicel Chirapak ID, hexane/ *i*-PrOH = 95/5, flow rate = 0.7 mL/min, T = 25 °C, 254 nm):  $t_R$  = 7.0 min (minor),  $t_R$  = 7.5 min (major).

**(*R*)-5-((3,5-bis(trifluoromethyl)phenyl)sulfonyl)-7-methyl-3-(2-(*p*-tolyl)vinylidene)-2,3,4,5-tetrahydrobenzo[*b*][1,4]oxazepine (9f)**

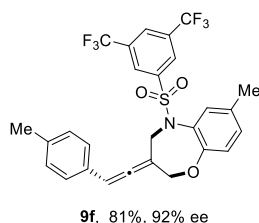

(Flash column chromatography eluent:petroleum ether/EtOAc = 12:1); white solid, 44.9 mg, 81% yield, 92% ee;

**<sup>1</sup>H NMR** (400 MHz, CDCl<sub>3</sub>)  $\delta$  (ppm) 8.03 (s, 1H), 7.99 (s, 2H), 7.40-7.39 (m, 1H), 7.17-7.14 (m, 1H), 7.04 (d,  $J$  = 7.9 Hz, 2H), 6.89 (d,  $J$  = 8.1 Hz, 2H), 6.83 (d,  $J$  = 8.2 Hz, 1H), 6.27 (s, 1H), 4.80 (d,  $J$  = 14.3 Hz, 1H), 4.29 (d,  $J$  = 12.2 Hz, 1H), 4.17-4.07 (m, 2H), 2.41 (s, 3H), 2.31 (s, 3H);

**<sup>13</sup>C NMR** (100 MHz, CDCl<sub>3</sub>)  $\delta$  (ppm) 204.4, 153.4, 141.8, 137.8, 135.2, 132.6 (q,  $J_{C-F}$  = 34.6 Hz), 132.2, 131.3, 130.8, 129.5, 129.4, 128.2 (d,  $J_{C-F}$  = 3.2 Hz), 127.0, 126.0 (d,  $J_{C-F}$  = 3.6 Hz), 124.0 (d,  $J_{C-F}$  = 273.5 Hz), 122.3, 98.8, 95.9, 72.8, 52.3, 21.2, 20.8;

**<sup>19</sup>F NMR** (470 MHz, CDCl<sub>3</sub>)  $\delta$  -62.9;

**HRMS** (ESI) exact mass calcd. For [C<sub>27</sub>H<sub>21</sub>F<sub>6</sub>NO<sub>3</sub>SNa]<sup>+</sup> requires  $m/z$  576.1039, found  $m/z$  576.1041;

$[\alpha]_{25}^D$  = 138.43 ( $c$  = 1.65, CHCl<sub>3</sub>);

**HPLC** (Daicel Chirapak ID, hexane/ *i*-PrOH = 95/5, flow rate = 1.0 mL/min, T = 25 °C, 254 nm):  $t_R$  = 4.6 min (minor),  $t_R$  = 4.9 min (major).

**(*R*)-3-(2-([1,1'-biphenyl]-4-yl)vinylidene)-5-((3,5-bis(trifluoromethyl)phenyl)sulfonyl)-7-methyl-2,3,4,5-tetrahydrobenzo[*b*][1,4]oxazepine (9g)**

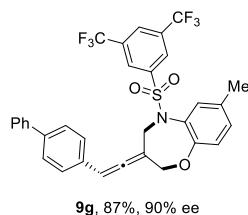

(Flash column chromatography eluent:petroleum ether/EtOAc = 12:1); white solid, 53.6 mg, 87% yield, 90% ee;

**<sup>1</sup>H NMR** (600 MHz, CDCl<sub>3</sub>)  $\delta$  (ppm) 8.04 (s, 1H), 8.00 (s, 2H), 7.55 (d, *J* = 7.7 Hz, 2H), 7.48-7.33 (m, 6H), 7.16 (d, *J* = 8.1 Hz, 1H), 7.07 (d, *J* = 7.4 Hz, 2H), 6.85 (d, *J* = 8.0 Hz, 1H), 6.34 (s, 1H), 4.83 (d, *J* = 14.3 Hz, 1H), 4.32 (d, *J* = 12.2 Hz, 1H), 4.19-4.11 (m, 2H), 2.42 (s, 3H);

**<sup>13</sup>C NMR** (100 MHz, CDCl<sub>3</sub>)  $\delta$  (ppm) 204.7, 153.4, 141.9, 140.8 (d, *J*<sub>C-F</sub> = 26.7 Hz), 135.3, 132.3 (q, *J*<sub>C-F</sub> = 34.1 Hz), 132.2, 131.5, 131.4, 130.8, 128.9, 128.2, 127.5, 127.4, 127.0, 126.0 (q, *J*<sub>C-F</sub> = 3.3 Hz), 124.0 (d, *J*<sub>C-F</sub> = 273.6 Hz), 122.3, 99.1, 95.8, 72.7, 52.3, 20.8;

**<sup>19</sup>F NMR** (376 MHz, CDCl<sub>3</sub>)  $\delta$  -62.9;

**HRMS** (ESI) exact mass calcd. For [C<sub>32</sub>H<sub>23</sub>F<sub>6</sub>NO<sub>3</sub>SNa]<sup>+</sup> requires *m/z* 638.1195, found *m/z* 638.1192;

[ $\alpha$ ]<sub>25</sub><sup>D</sup> = 160.44 (*c* = 1.69, CHCl<sub>3</sub>);

**HPLC** (Daicel Chirapak ID, hexane/ *i*-PrOH = 90/10, flow rate = 1.0 mL/min, T = 25 °C, 254 nm): *t*<sub>R</sub> = 19.1 min (minor), *t*<sub>R</sub> = 22.3 min (major).

**(*R*)-5-((3,5-bis(trifluoromethyl)phenyl)sulfonyl)-3-(2-(4-methoxyphenyl)vinylidene)-7-methyl-2,3,4,5-tetrahydrobenzo[*b*][1,4]oxazepine (9h)**

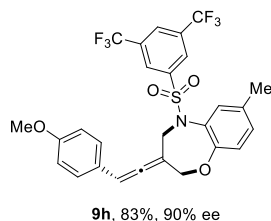

(Flash column chromatography eluent:petroleum ether/EtOAc = 12:1); white solid, 47.3 mg, 83% yield, 90% ee;

**<sup>1</sup>H NMR** (600 MHz, CDCl<sub>3</sub>)  $\delta$  (ppm) 8.03 (s, 1H), 7.99 (s, 2H), 7.39 (d, *J* = 1.6 Hz, 1H), 7.16-7.14 (m, 1H), 6.91 (d, *J* = 8.8 Hz, 2H), 6.83 (d, *J* = 8.2 Hz, 1H), 6.78-6.76 (m, 2H),

6.25 (s, 1H), 4.78 (d,  $J = 14.2$  Hz, 1H), 4.29 (d,  $J = 12.2$  Hz, 1H), 4.17-4.08 (m, 2H), 3.78 (s, 3H), 2.41 (s, 3H);

$^{13}\text{C}$  NMR (150 MHz,  $\text{CDCl}_3$ )  $\delta$  (ppm) 204.2, 159.4, 153.4, 141.9, 135.1, 132.5 (q,  $J_{\text{C-F}} = 34.1$  Hz), 132.1, 131.3, 130.8, 128.3, 128.1 (d,  $J_{\text{C-F}} = 3.3$  Hz), 125.9 (q,  $J_{\text{C-F}} = 3.3$  Hz), 125.3 (q,  $J_{\text{C-F}} = 273.4$  Hz), 124.6, 122.3, 114.3, 98.8, 95.6, 72.9, 55.3, 52.4, 20.7;

$^{19}\text{F}$  NMR (564 MHz,  $\text{CDCl}_3$ )  $\delta$  -62.9;

HRMS (ESI) exact mass calcd. For  $[\text{C}_{27}\text{H}_{21}\text{F}_6\text{NO}_4\text{SNa}]^+$  requires  $m/z$  592.0988, found  $m/z$  592.0990;

$[\alpha]_{25}^{\text{D}} = 187.22$  ( $c = 1.67$ ,  $\text{CHCl}_3$ );

HPLC (Daicel Chirapak IB-3, hexane/ *i*-PrOH = 90/10, flow rate = 1.0 mL/min,  $T = 25$  °C, 254 nm):  $t_{\text{R}} = 11.7$  min (minor),  $t_{\text{R}} = 12.8$  min (major).

**(*R*)-5-((3,5-bis(trifluoromethyl)phenyl)sulfonyl)-3-(2-(3-fluorophenyl)vinylidene)-7-methyl-2,3,4,5-tetrahydrobenzo[*b*][1,4]oxazepine (9i)**

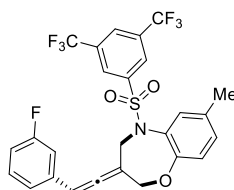

9i, 78%, 84% ee

(Flash column chromatography eluent:petroleum ether/EtOAc = 12:1); white solid, 43.4 mg, 78% yield, 84% ee;

$^1\text{H}$  NMR (600 MHz,  $\text{CDCl}_3$ )  $\delta$  (ppm) 8.04 (s, 1H), 7.99 (s, 2H), 7.40 (s, 1H), 7.22-7.16 (m, 2H), 6.91-6.81 (m, 3H), 6.60 (d,  $J = 9.7$  Hz, 1H), 6.26 (s, 1H), 4.80 (d,  $J = 14.2$  Hz, 1H), 4.32 (d,  $J = 12.2$  Hz, 1H), 4.19-4.10 (m, 2H), 2.41 (s, 3H);

$^{13}\text{C}$  NMR (100 MHz,  $\text{CDCl}_3$ )  $\delta$  (ppm) 204.6, 164.3 (d,  $J_{\text{C-F}} = 246.1$  Hz), 153.2, 141.8, 135.5, 134.9 (d,  $J_{\text{C-F}} = 7.7$  Hz), 132.3 (q,  $J_{\text{C-F}} = 34.4$  Hz), 132.1, 131.5, 130.6, 130.2 (d,  $J_{\text{C-F}} = 8.4$  Hz), 128.1, 126.0 (t,  $J_{\text{C-F}} = 2.7$  Hz), 123.9 (q,  $J_{\text{C-F}} = 274.1$  Hz), 123.0, 122.2, 114.9 (d,  $J_{\text{C-F}} = 21.5$  Hz), 113.6 (d,  $J_{\text{C-F}} = 22.3$  Hz), 99.4, 95.4, 72.4, 52.0, 20.7;

$^{19}\text{F}$  NMR (376 MHz,  $\text{CDCl}_3$ ) -62.9, -112.9;

HRMS (ESI) exact mass calcd. For  $[\text{C}_{26}\text{H}_{18}\text{F}_7\text{NO}_3\text{SNa}]^+$  requires  $m/z$  580.0788, found  $m/z$  580.0787;

$[\alpha]_{25}^{\text{D}} = 92.36$  ( $c = 1.27$ ,  $\text{CHCl}_3$ );

HPLC (Daicel Chirapak ID, hexane/ *i*-PrOH = 95/5, flow rate = 1.0 mL/min,  $T = 25$  °C, 254 nm):  $t_{\text{R}} = 4.8$  min (minor),  $t_{\text{R}} = 5.0$  min (major).

**(R)-5-((3,5-bis(trifluoromethyl)phenyl)sulfonyl)-7-methyl-3-(2-(m-tolyl)vinylidene)-2,3,4,5-tetrahydrobenzo[*b*][1,4]oxazepine (9j)**

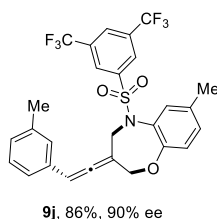

(Flash column chromatography eluent:petroleum ether/EtOAc = 12:1); white solid, 47.6 mg, 86% yield, 90% ee;

**<sup>1</sup>H NMR** (500 MHz, CDCl<sub>3</sub>)  $\delta$  (ppm) 8.03 (s, 1H), 7.99 (s, 2H), 7.40-7.39 (m, 1H), 7.16-7.11 (m, 2H), 7.02 (d, *J* = 7.5 Hz, 1H), 6.84-6.80 (m, 3H), 6.26 (s, 1H), 4.82 (d, *J* = 14.3 Hz, 1H), 4.31 (d, *J* = 12.3 Hz, 1H), 4.18-4.09 (m, 2H), 2.41 (s, 3H), 2.27 (s, 3H);

**<sup>13</sup>C NMR** (125 MHz, CDCl<sub>3</sub>)  $\delta$  (ppm) 204.5, 153.4, 141.8, 138.4, 135.2, 132.3, 132.2 (q, *J*<sub>C-F</sub> = 34.6 Hz), 132.1, 131.4, 130.7, 128.7, 128.6, 128.1 (d, *J*<sub>C-F</sub> = 3.1 Hz), 127.7, 126.0 (t, *J*<sub>C-F</sub> = 3.6 Hz), 124.3, 123.7 (q, *J*<sub>C-F</sub> = 273.2 Hz), 122.2, 98.7, 96.2, 72.6, 52.3, 21.2, 20.8;

**<sup>19</sup>F NMR** (470 MHz, CDCl<sub>3</sub>) -62.9;

**HRMS** (ESI) exact mass calcd. For (C<sub>27</sub>H<sub>21</sub>F<sub>6</sub>NO<sub>3</sub>SNa)<sup>+</sup> requires *m/z* 576.1039, found *m/z* 576.1040;

[ $\alpha$ ]<sub>25</sub><sup>D</sup> = 113.44 (*c* = 1.43, CHCl<sub>3</sub>);

**HPLC** (Daicel Chirapak ID, hexane/ *i*-PrOH = 95/5, flow rate = 1.0 mL/min, T = 25 °C, 254 nm): t<sub>R</sub> = 6.3 min (minor), t<sub>R</sub> = 6.9 min (major).

**(R)-5-((3,5-bis(trifluoromethyl)phenyl)sulfonyl)-7-methyl-3-(2-(o-tolyl)vinylidene)-2,3,4,5-tetrahydrobenzo[*b*][1,4]oxazepine (9k)**

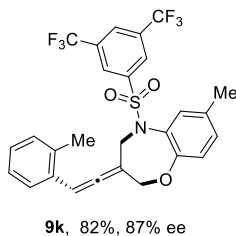

(Flash column chromatography eluent:petroleum ether/EtOAc = 12:1); white solid, 45.4 mg, 82% yield, 87% ee;

**<sup>1</sup>H NMR** (600 MHz, CDCl<sub>3</sub>)  $\delta$  (ppm) 8.03 (s, 1H), 7.99 (s, 2H), 7.39 (s, 1H), 7.15-7.11 (m, 3H), 7.05-7.03 (m, 1H), 6.91 (d, *J* = 7.6 Hz, 1H), 6.83 (d, *J* = 8.0 Hz, 1H), 6.51 (s,

<sup>1</sup>H), 4.86 (d, *J* = 14.5 Hz, 1H), 4.31 (d, *J* = 12.3 Hz, 1H), 4.14-4.06 (m, 2H), 2.40 (s, 3H), 2.31 (s, 3H);

<sup>13</sup>C NMR (100 MHz, CDCl<sub>3</sub>)  $\delta$  (ppm) 204.9, 153.6, 141.9, 135.6, 135.2, 132.2, 131.9, 131.3, 130.8, 130.7 (d, *J*<sub>C-F</sub> = 2.3 Hz), 128.2, 127.8, 127.5, 126.2, 126.0 (t, *J*<sub>C-F</sub> = 3.5 Hz), 124.0 (d, *J*<sub>C-F</sub> = 274.5 Hz), 122.2, 97.9, 93.4, 72.8, 52.4, 20.8, 19.7;

<sup>19</sup>F NMR (376 MHz, CDCl<sub>3</sub>)  $\delta$  -62.9;

HRMS (ESI) exact mass calcd. For [C<sub>27</sub>H<sub>21</sub>F<sub>6</sub>NO<sub>3</sub>SNa]<sup>+</sup> requires *m/z* 576.1039, found *m/z* 576.1040;

[ $\alpha$ ]<sub>25</sub><sup>D</sup> = 131.29 (*c* = 1.68, CHCl<sub>3</sub>);

HPLC (Daicel Chirapak ID, hexane/ *i*-PrOH = 90/10, flow rate = 1.0 mL/min, T = 25 °C, 254 nm): *t*<sub>R</sub> = 15.1 min (minor), *t*<sub>R</sub> = 16.0 min (major).

**(*R*)-5-((3,5-bis(trifluoromethyl)phenyl)sulfonyl)-7-methyl-3-(2-(naphthalen-2-yl)vinylidene)-2,3,4,5-tetrahydrobenzo[*b*][1,4]oxazepine (9l)**

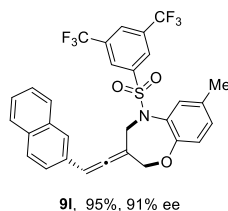

(Flash column chromatography eluent:petroleum ether/EtOAc = 12:1); white solid, 56.1 mg, 95% yield, 91% ee;

<sup>1</sup>H NMR (400 MHz, CDCl<sub>3</sub>)  $\delta$  (ppm) 8.05 (s, 1H), 8.02 (s, 2H), 7.77-7.72 (m, 2H), 7.65 (d, *J* = 8.6 Hz, 1H), 7.53 (s, 1H), 7.46-7.41 (m, 3H), 7.19-7.17 (m, 1H), 7.01-6.99 (m, 1H), 6.86 (d, *J* = 8.1 Hz, 1H), 6.47 (s, 1H), 4.86 (d, *J* = 14.4 Hz, 1H), 4.35 (d, *J* = 12.3 Hz, 1H), 4.23-4.14 (m, 2H), 2.43 (s, 3H);

<sup>13</sup>C NMR (100 MHz, CDCl<sub>3</sub>)  $\delta$  (ppm) 205.0, 153.4, 141.9, 135.3, 133.5, 132.9, 132.3 (q, *J*<sub>C-F</sub> = 34.1 Hz), 132.2, 131.4, 130.8, 129.9, 128.4, 128.2 (d, *J*<sub>C-F</sub> = 3.2 Hz), 127.8, 127.7, 126.5, 126.2, 126.0 (t, *J*<sub>C-F</sub> = 3.6 Hz), 124.4, 124.0 (d, *J*<sub>C-F</sub> = 273.5 Hz), 122.3, 99.2, 96.5, 72.7, 52.3, 20.8;

<sup>19</sup>F NMR (376 MHz, CDCl<sub>3</sub>)  $\delta$  -62.9;

HRMS (ESI) exact mass calcd. For [C<sub>30</sub>H<sub>21</sub>F<sub>6</sub>NO<sub>3</sub>SNa]<sup>+</sup> requires *m/z* 612.1039, found *m/z* 612.1042;

[ $\alpha$ ]<sub>25</sub><sup>D</sup> = 169.74 (*c* = 1.49, CHCl<sub>3</sub>);

**HPLC** (Daicel Chirapak ID, hexane/ *i*-PrOH = 90/10, flow rate = 1.0 mL/min, T = 25 °C, 254 nm):  $t_R$  = 14.1 min (minor),  $t_R$  = 15.8 min (major).

### Spectral data of products 10

#### *N*-(2-hydroxyphenyl)-*N*-(2-methylene-4-phenylbut-3-yn-1-yl)benzenesulfonamide (10a)

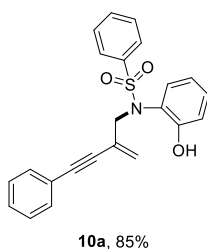

(Flash column chromatography eluent:petroleum ether/EtOAc = 10:1); yellow oily liquid, 33.1 mg, 85% yield;

**$^1\text{H}$  NMR** (400 MHz,  $\text{CD}_3\text{OD}$ )  $\delta$  (ppm) 7.71(d,  $J$  = 7.8 Hz, 2H), 7.60-7.56 (m, 1H), 7.48-7.44 (m, 4H), 7.36 (s, 3H), 7.21-7.12 (m, 2H), 6.76-6.73 (m, 2H), 5.41 (d,  $J$  = 11.5 Hz, 2H), 4.66 (s, 1H), 4.46 (s, 2H);

**$^{13}\text{C}$  NMR** (100 MHz,  $\text{CD}_3\text{OD}$ )  $\delta$  (ppm) 154.8, 139.9, 132.7, 132.4, 131.3, 129.5, 128.4, 128.2, 128.1, 127.9, 127.3, 124.3, 122.9, 122.8, 118.8, 116.0, 90.4, 87.5, 54.3;

**HRMS** (ESI) exact mass calcd. For  $[\text{C}_{23}\text{H}_{19}\text{NO}_3\text{SNa}]^+$  requires  $m/z$  412.0978, found  $m/z$  412.0976.

#### *N*-(2-hydroxyphenyl)-*N*-(4-(4-methoxyphenyl)-2-methylenebut-3-yn-1-yl)benzene sulfonamide (10b)

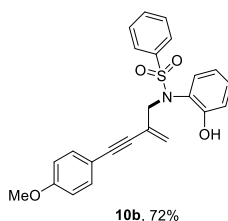

(Flash column chromatography eluent:petroleum ether/EtOAc = 10:1); yellow oily liquid, 30.2 mg, 72% yield;

**$^1\text{H}$  NMR** (500 MHz,  $\text{CDCl}_3$ )  $\delta$  (ppm) 7.70-7.68 (m, 2H), 7.61 (t,  $J$  = 7.5 Hz, 1H), 7.48-7.43 (m, 4H), 7.20-7.17 (m, 1H), 7.03-7.01 (m, 1H), 6.88-6.85 (m, 2H), 6.74 (s, 1H), 6.71-6.67 (m, 1H), 6.43-6.41 (m, 1H), 5.41 (s, 1H), 5.24 (d,  $J$  = 0.8 Hz, 1H), 5.06-3.96 (m, 2H), 4.50 (b, 2H), 3.82 (s, 3H);

**<sup>13</sup>C NMR** (125 MHz, CDCl<sub>3</sub>)  $\delta$  (ppm) 160.0, 155.2, 137.2, 133.4, 133.3, 130.3, 129.0, 128.1, 127.9, 126.4, 125.3, 124.1, 120.4, 117.5, 114.4, 114.1, 91.9, 86.0, 57.4, 55.3;  
**HRMS** (ESI) exact mass calcd. For [C<sub>24</sub>H<sub>22</sub>NO<sub>4</sub>S]<sup>+</sup> requires  $m/z$  420.1264, found  $m/z$  420.1265.

**2,4,6-trimethyl-*N*-(2-methylene-4-phenylbut-3-yn-1-yl)-*N*-phenylbenzenesulfonamide (10c)**

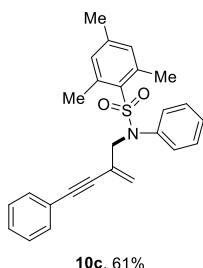

(Flash column chromatography eluent:petroleum ether/EtOAc = 10:1); yellow oily liquid, 25.3 mg, 61% yield;

**<sup>1</sup>H NMR** (400 MHz, CDCl<sub>3</sub>)  $\delta$  (ppm) 7.42-7.39 (m, 2H), 7.33-7.31 (m, 3H), 7.26-7.20 (m, 5H), 6.83 (s, 2H), 5.43 (s, 1H), 5.32 (s, 1H), 4.46 (s, 2H), 2.47 (s, 6H), 2.25 (s, 3H);  
**<sup>13</sup>C NMR** (100 MHz, CDCl<sub>3</sub>)  $\delta$  (ppm) 142.6, 140.6, 138.6, 132.6, 131.8, 131.7, 129.8, 129.0, 128.4, 128.3, 128.1, 126.9, 125.0, 122.9, 90.8, 87.9, 55.7, 23.1, 21.0;  
**HRMS** (ESI) exact mass calcd. For [C<sub>26</sub>H<sub>25</sub>NO<sub>2</sub>S]<sup>+</sup> requires  $m/z$  438.1498, found  $m/z$  438.1499.

***N*-(2-(tert-butyl)phenyl)-2,4,6-trimethyl-*N*-(2-methyleneundec-3-yn-1-yl)benzene sulfonamide (10d)**

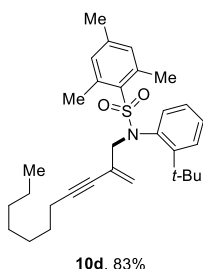

(Flash column chromatography eluent:petroleum ether/EtOAc = 10:1); yellow oily liquid, 37.7 mg, 83% yield;

**<sup>1</sup>H NMR** (400 MHz, CDCl<sub>3</sub>)  $\delta$  (ppm) 7.54-7.52 (m, 1H), 7.23-7.21 (m, 1H), 6.91-6.89 (m, 3H), 6.72-6.70 (m, 1H), 5.30 (s, 1H), 5.13 (s, 1H), 4.44 (d,  $J$  = 13.3 Hz, 1H), 4.29 (d,

$J = 13.3$  Hz, 1H), 2.28 (s, 3H), 2.25 (s, 6H), 2.09 (t,  $J = 7.0$  Hz, 2H), 1.48-1.47 (m, 9H), 1.39-1.25 (m, 10H), 0.90-0.87 (m, 3H);

**$^{13}\text{C}$  NMR** (100 MHz,  $\text{CDCl}_3$ )  $\delta$  (ppm) 150.8, 141.8, 140.2, 135.4, 133.9, 132.3, 132.2, 132.1, 130.9, 128.1, 126.7, 126.4, 125.5, 125.3, 92.7, 80.2, 58.3, 37.1, 32.9, 31.7, 28.9, 28.8, 28.4, 24.2, 22.6, 20.9, 19.3, 14.1;

**HRMS** (ESI) exact mass calcd. For  $[\text{C}_{31}\text{H}_{44}\text{NO}_2\text{S}]^+$  requires  $m/z$  494.3087, found  $m/z$  494.3089.

## 10. NMR spectra

### NMR spectra of 1

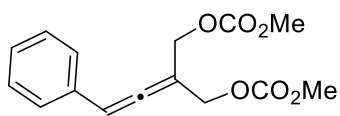

**1a**

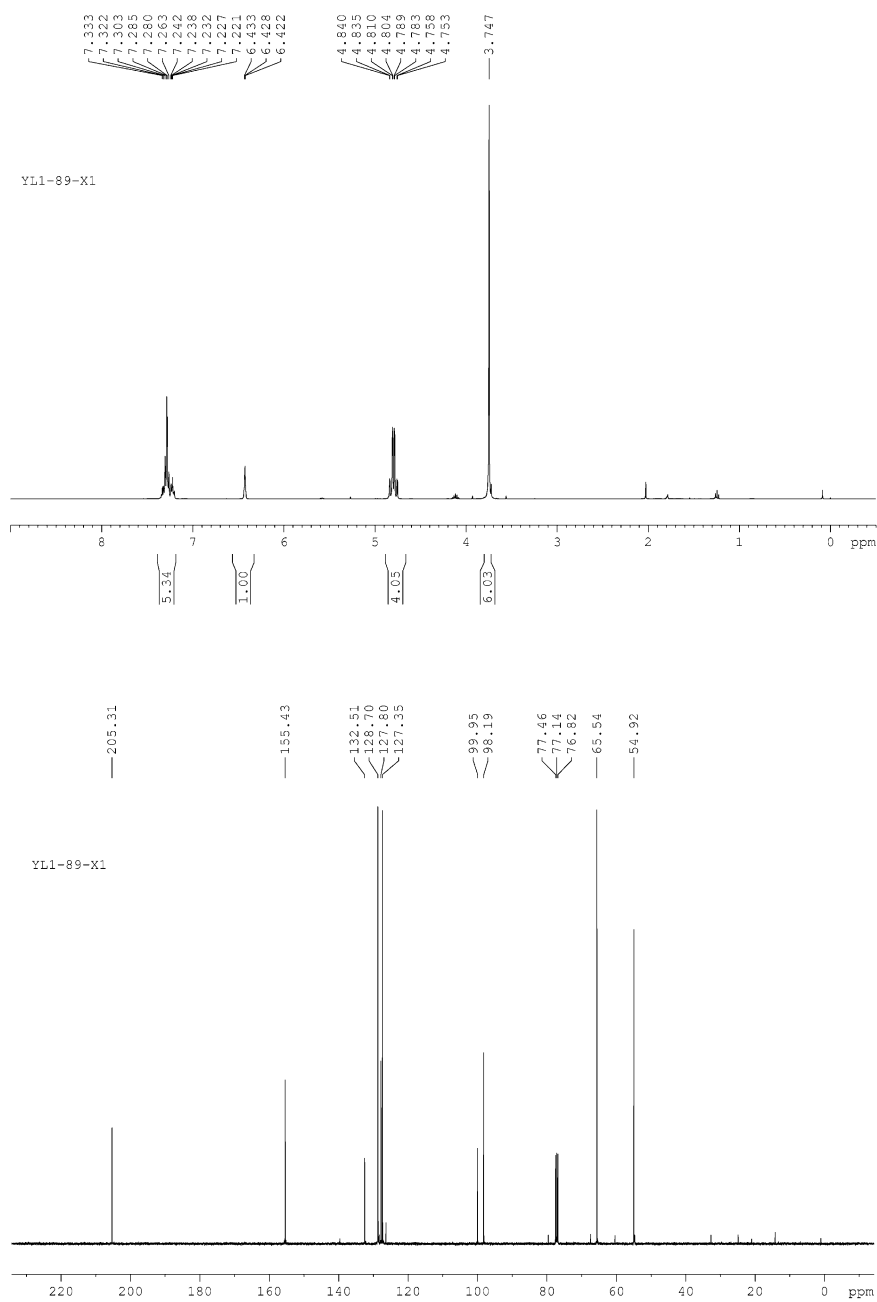

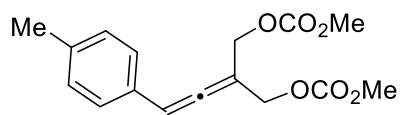

**1b**

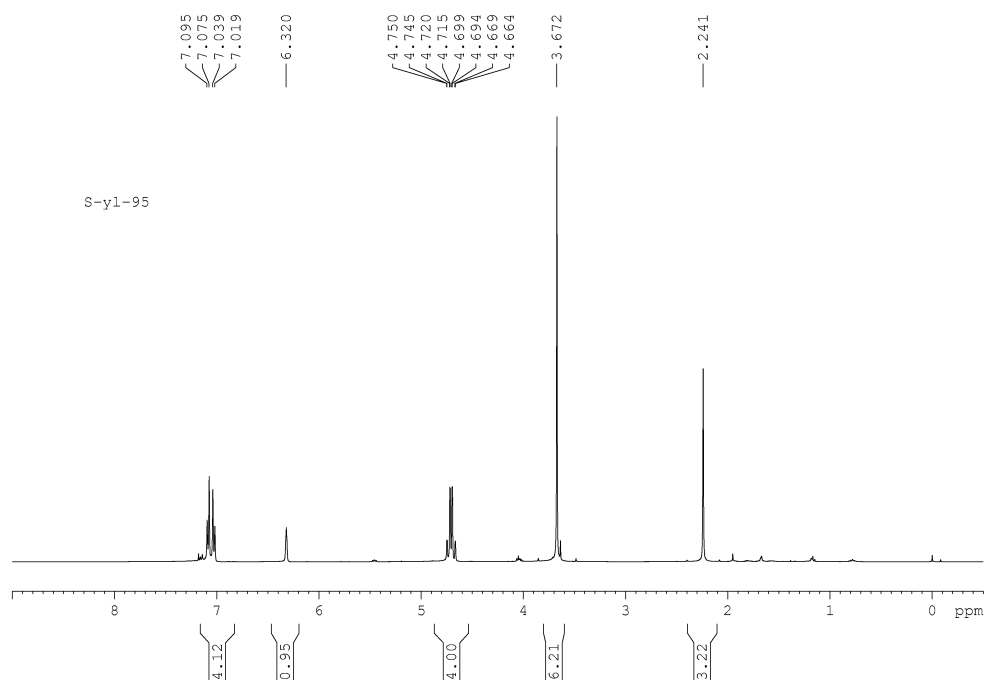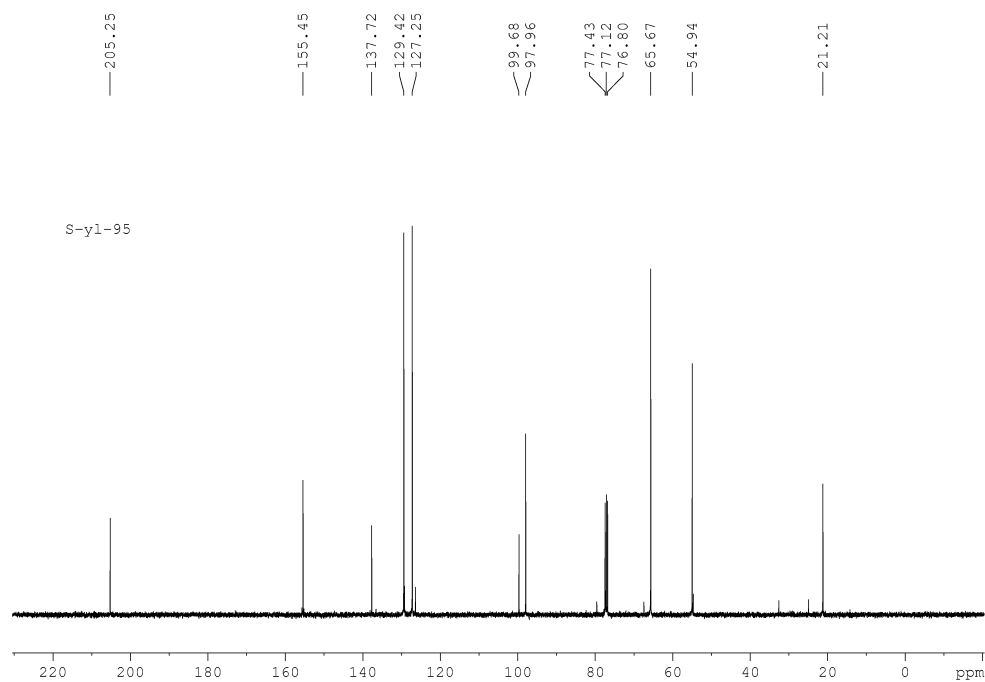

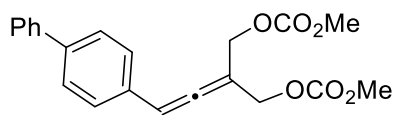

**1c**

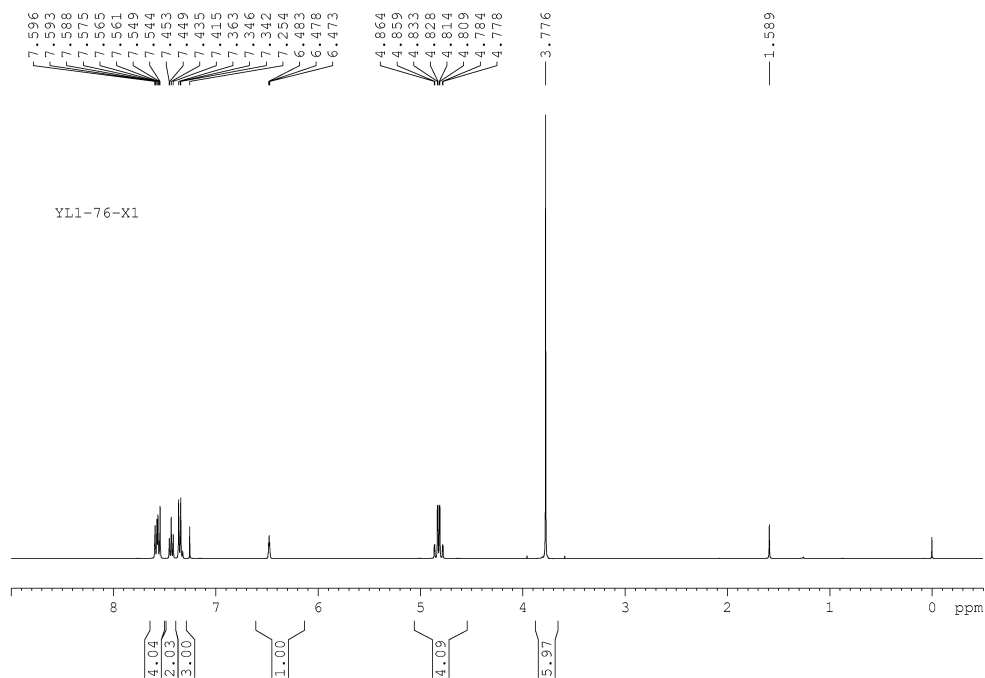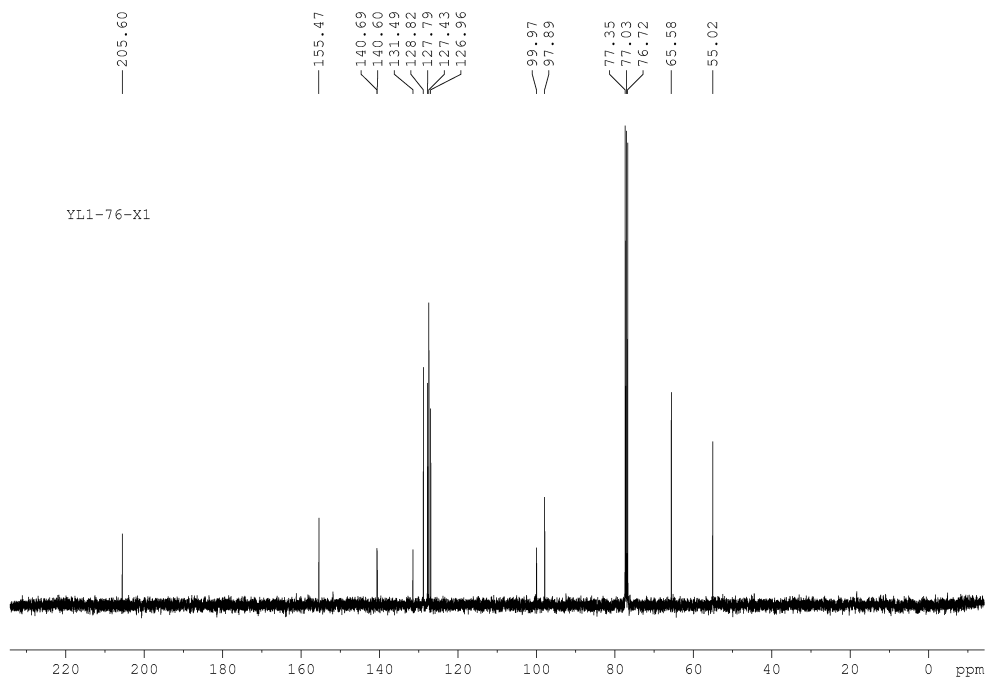

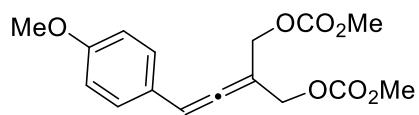

**1d**

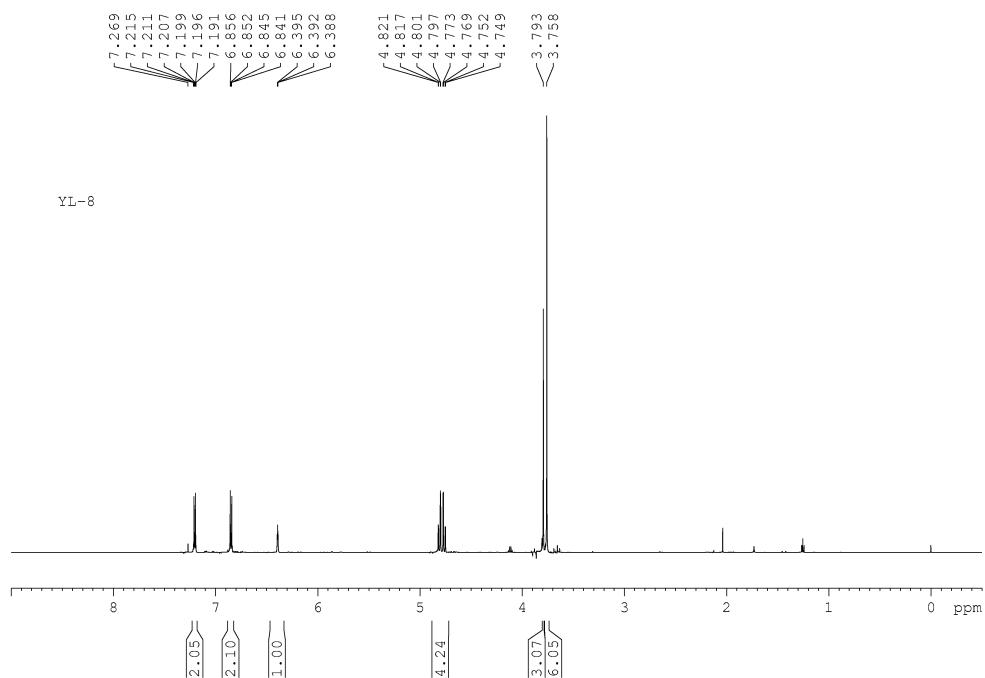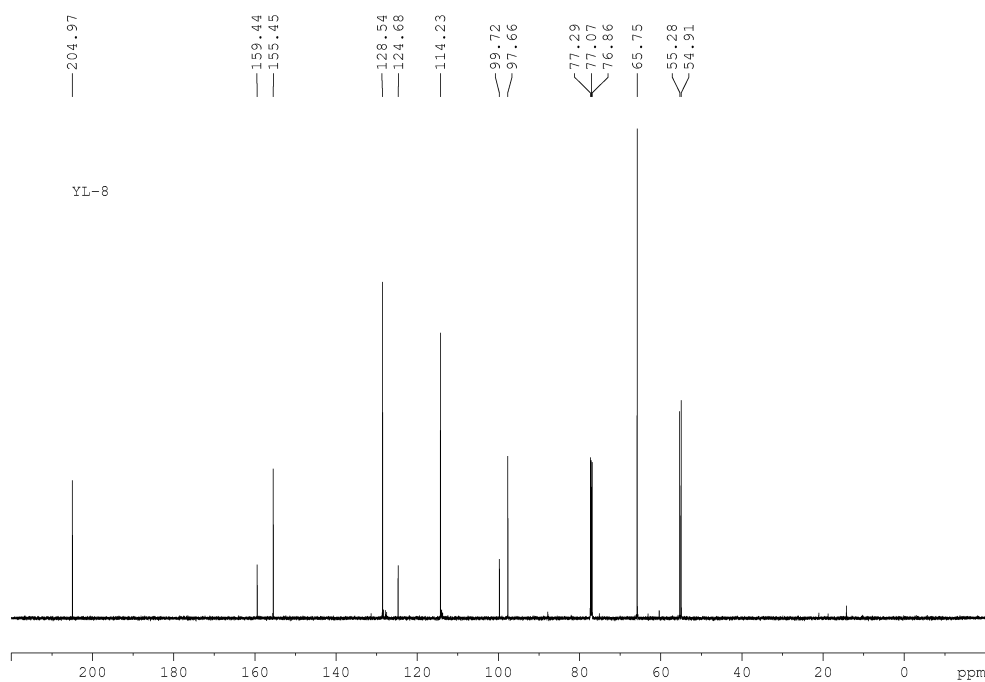

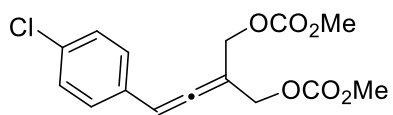

**1e**

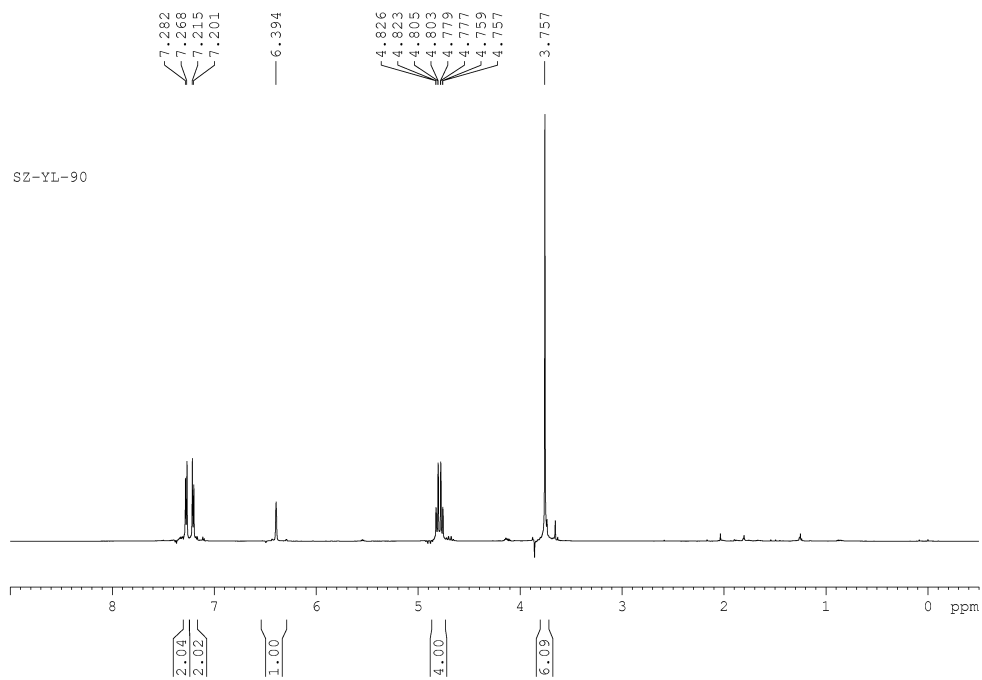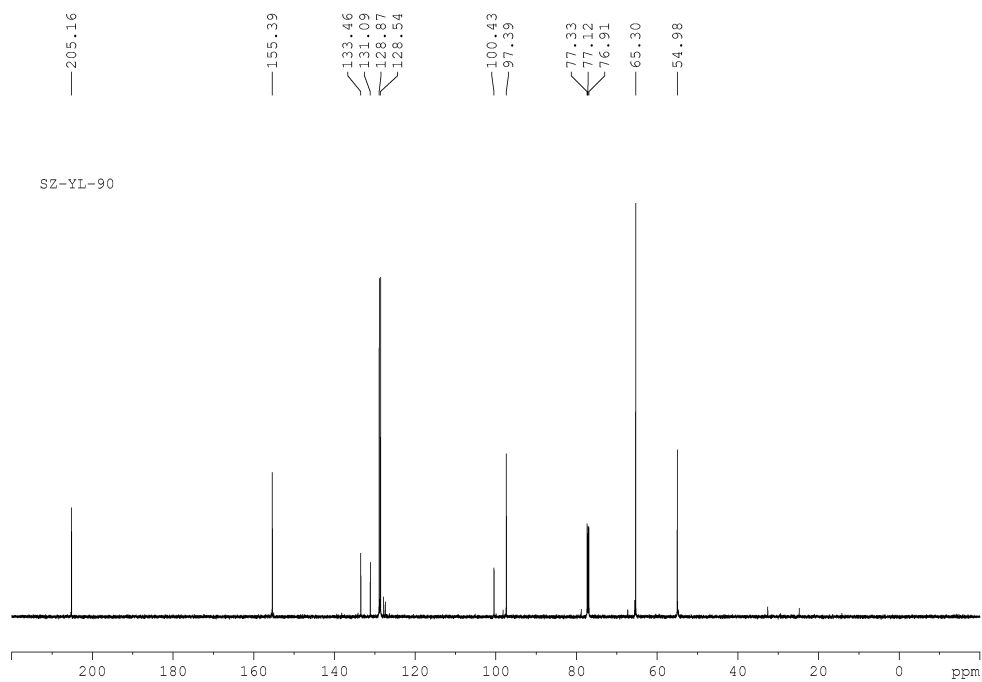

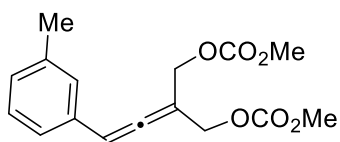

**1f**

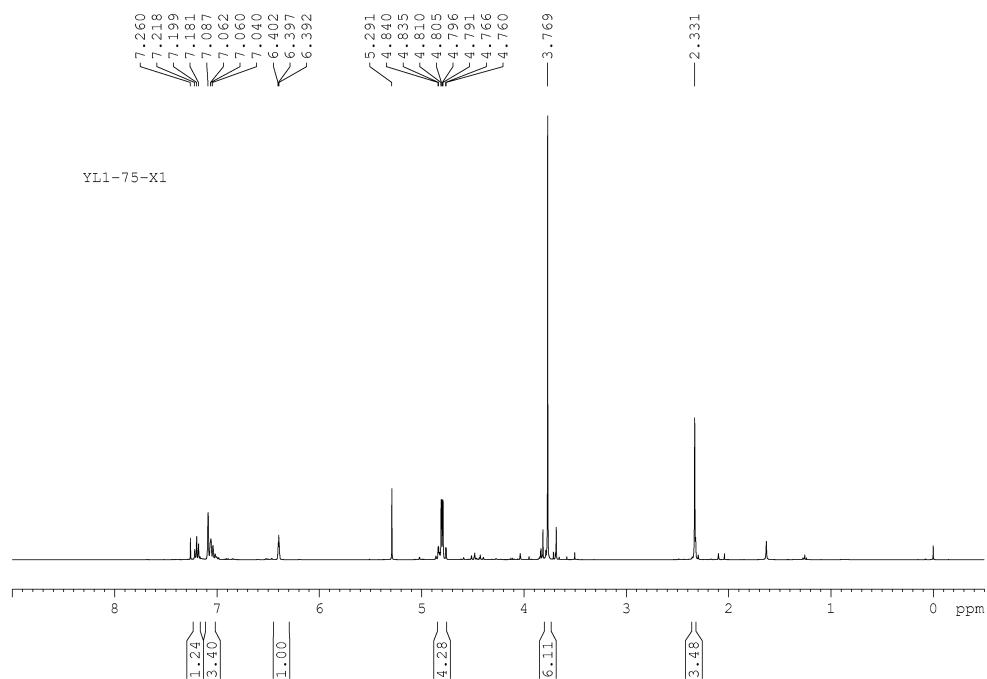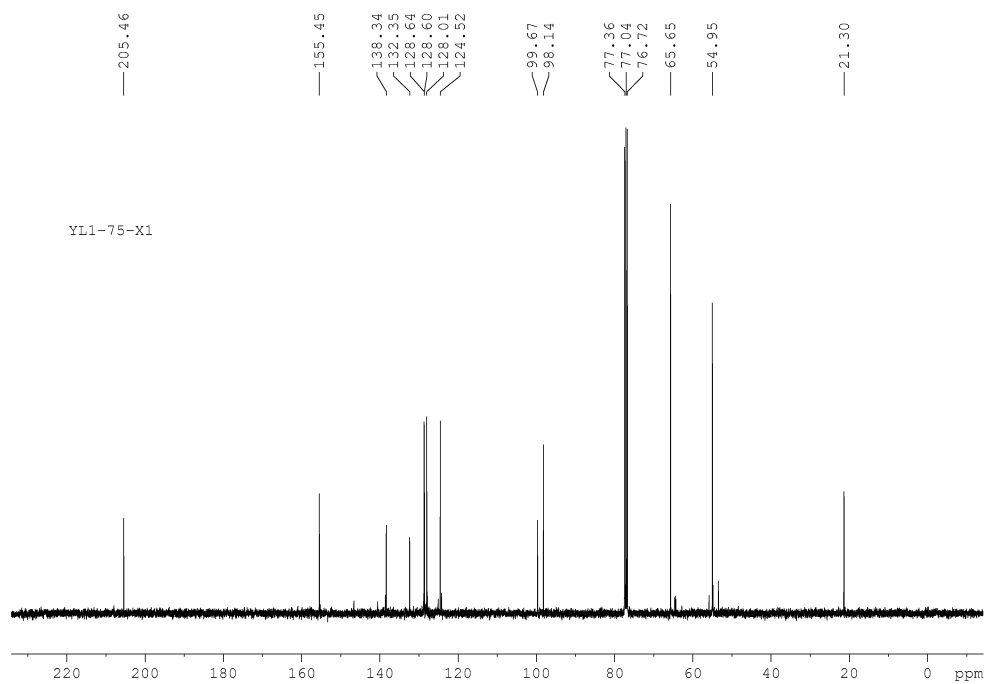

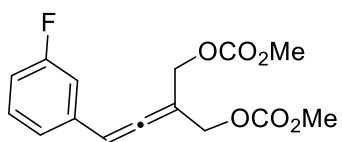

**1g**

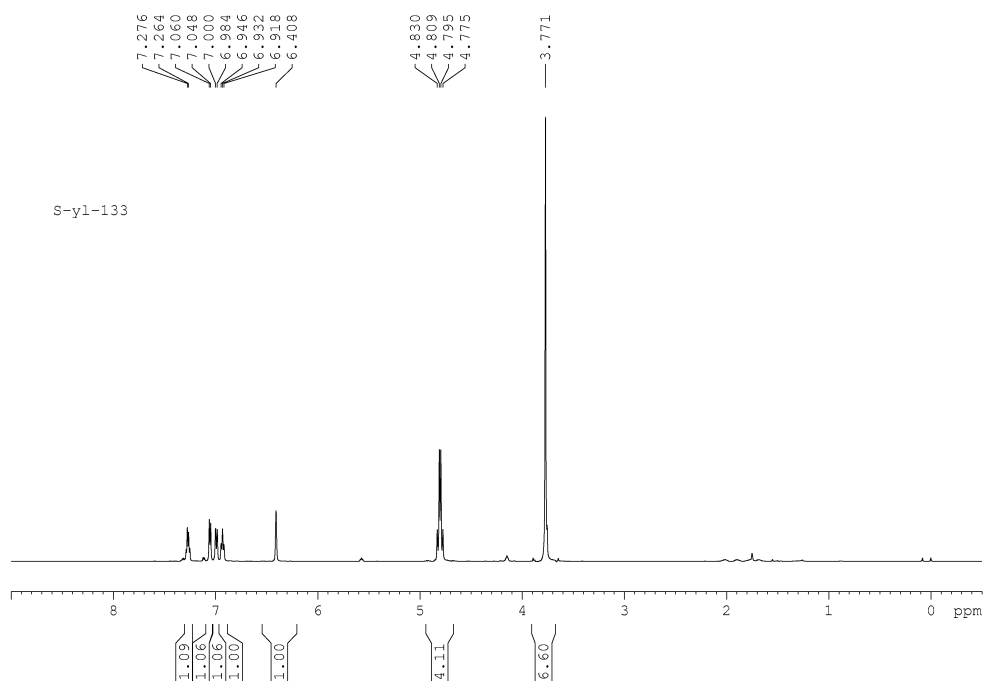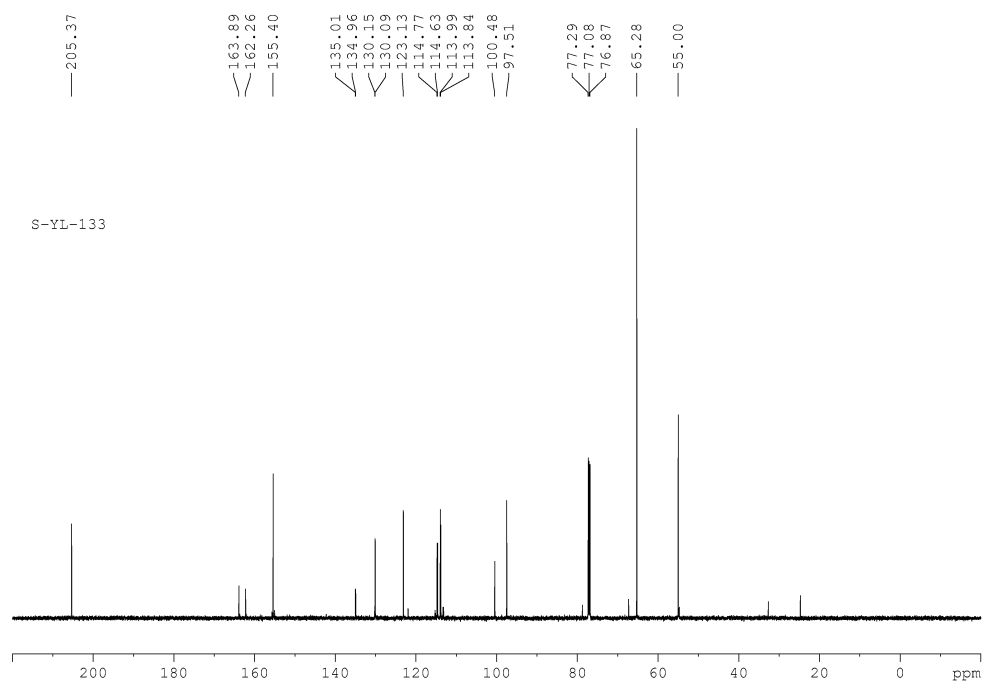

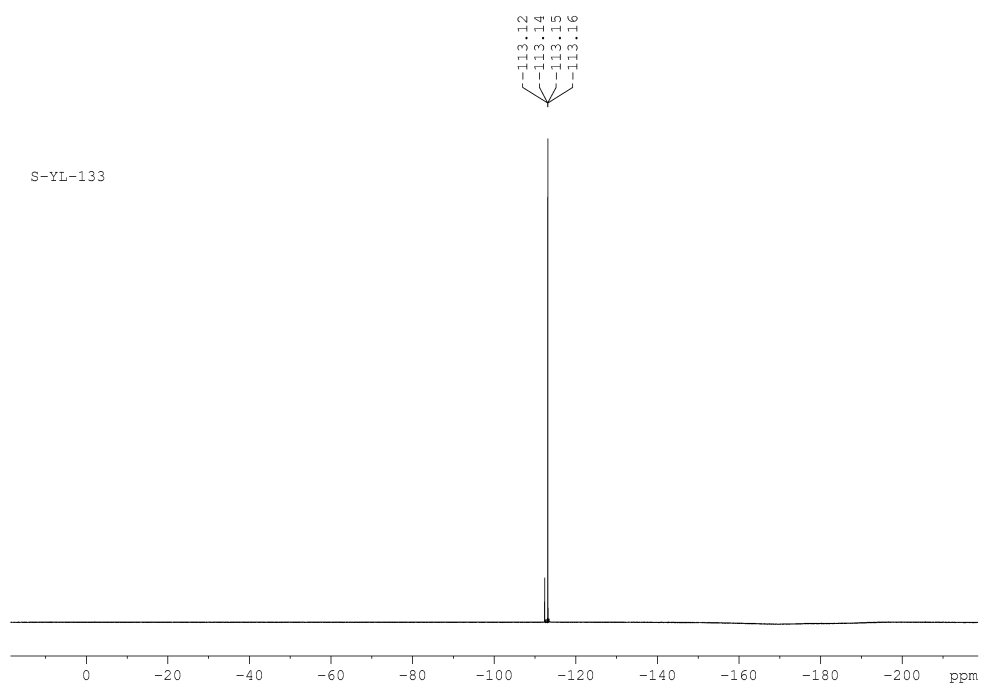

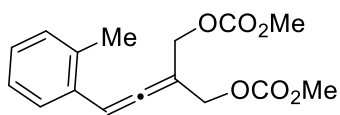

**1h**

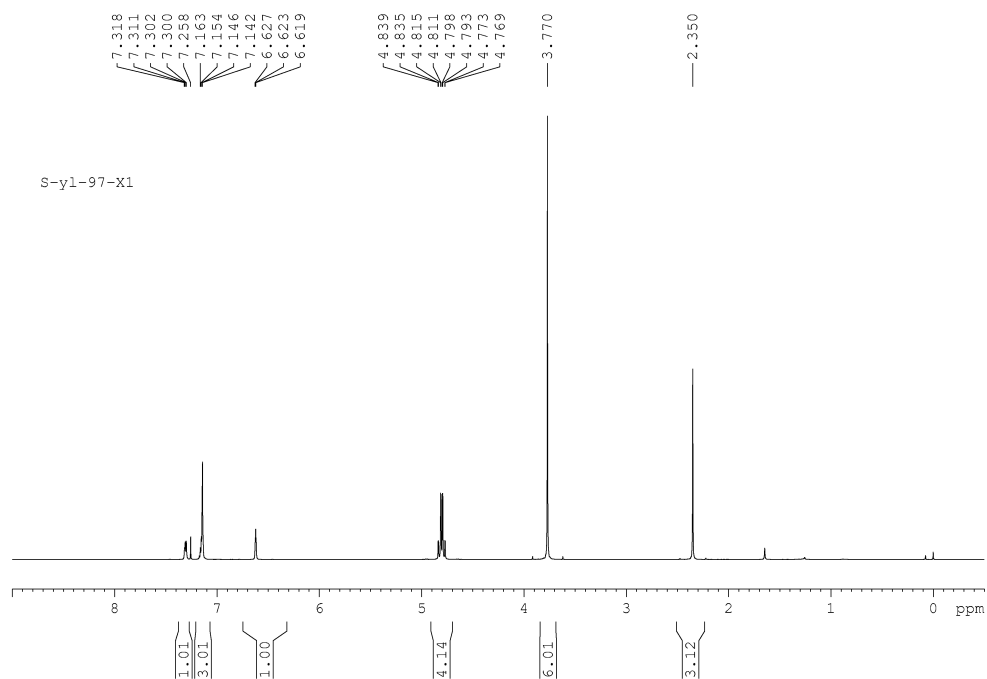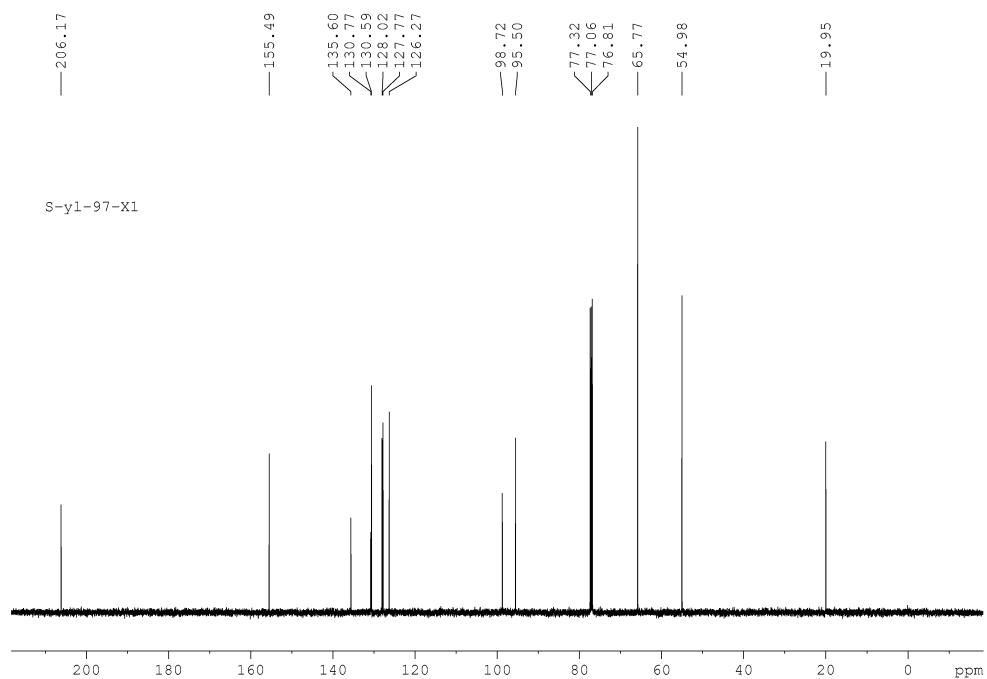

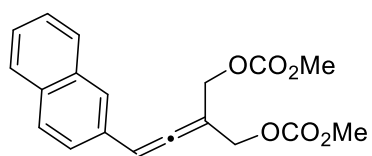

**1i**

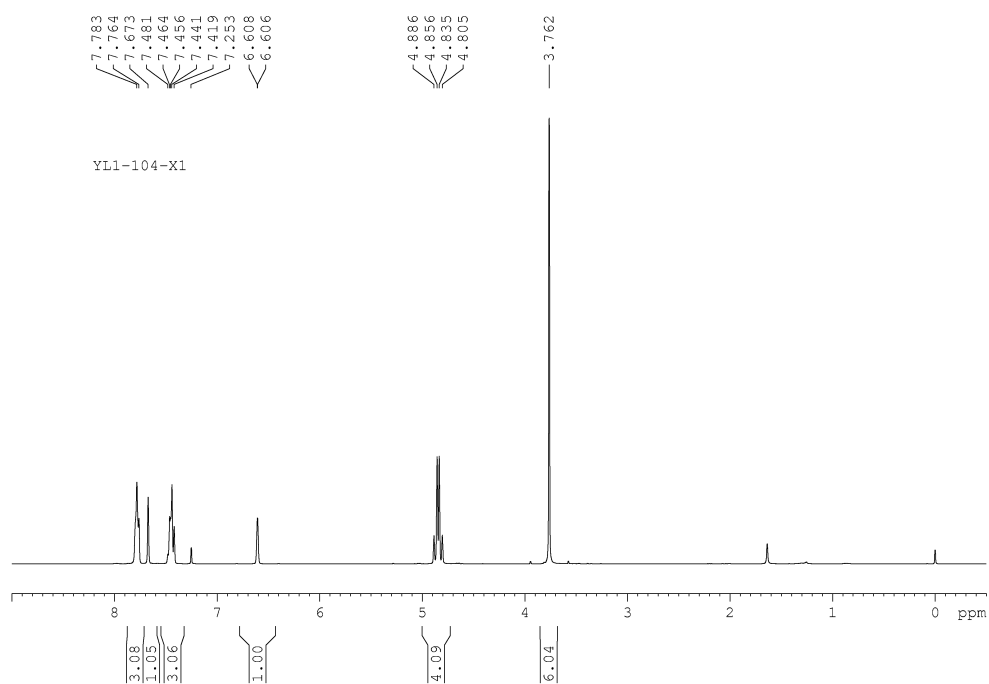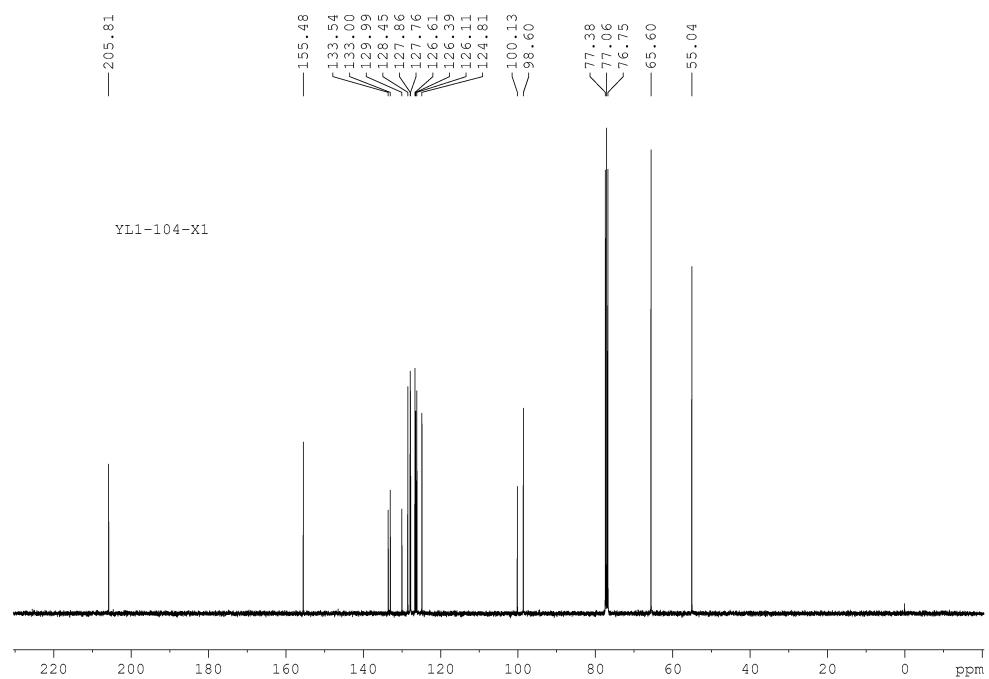

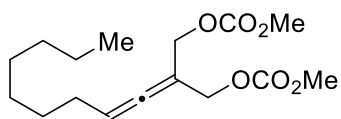

**1j**

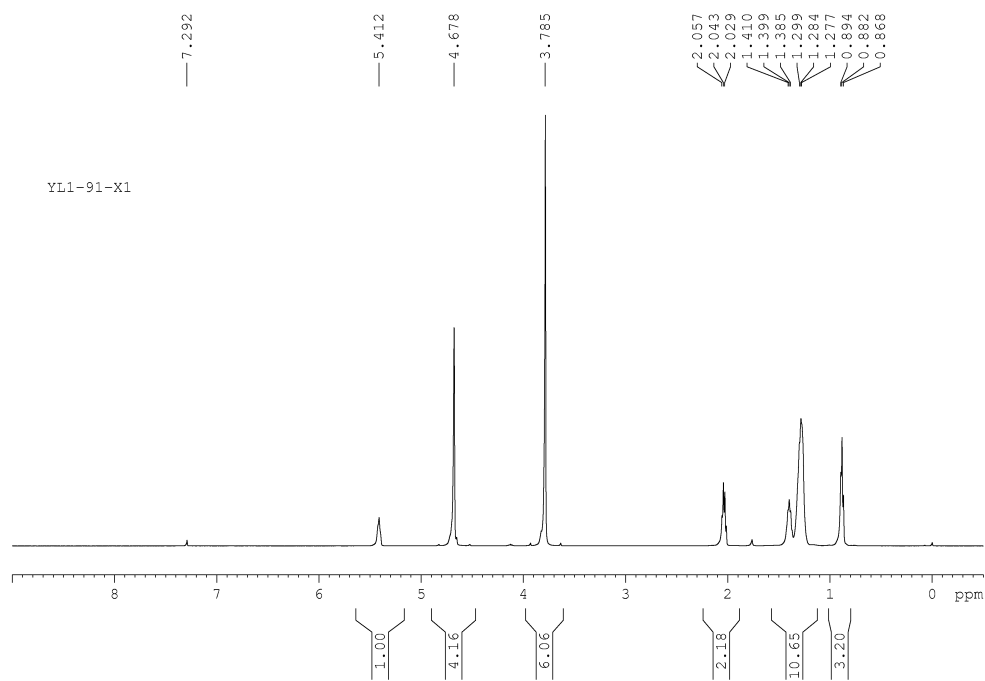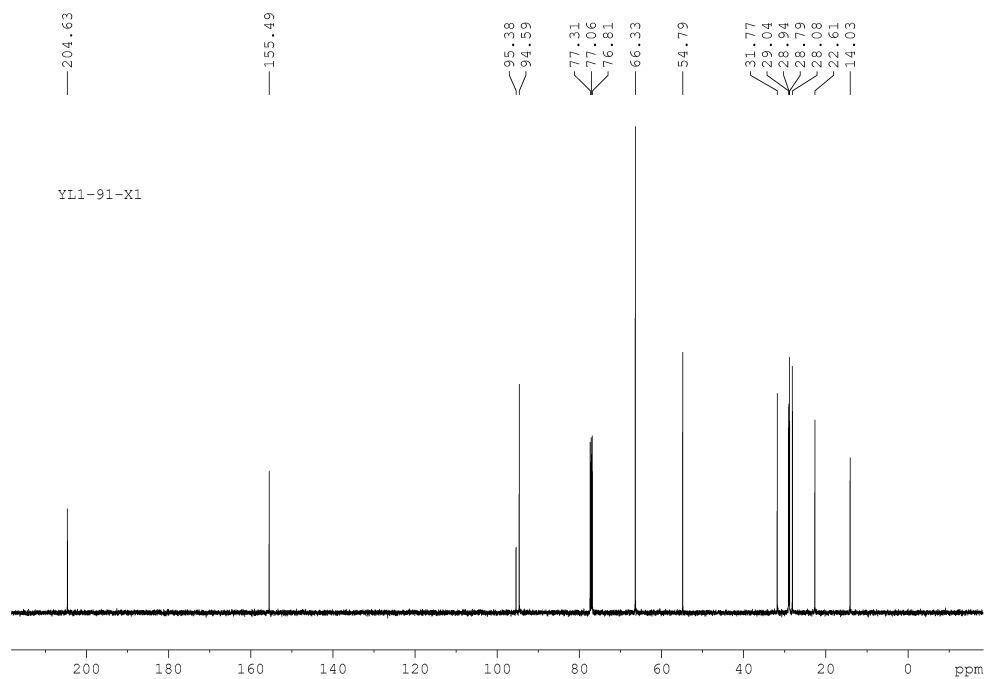

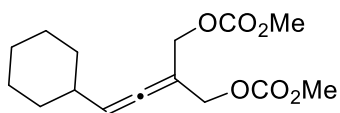

**1k**

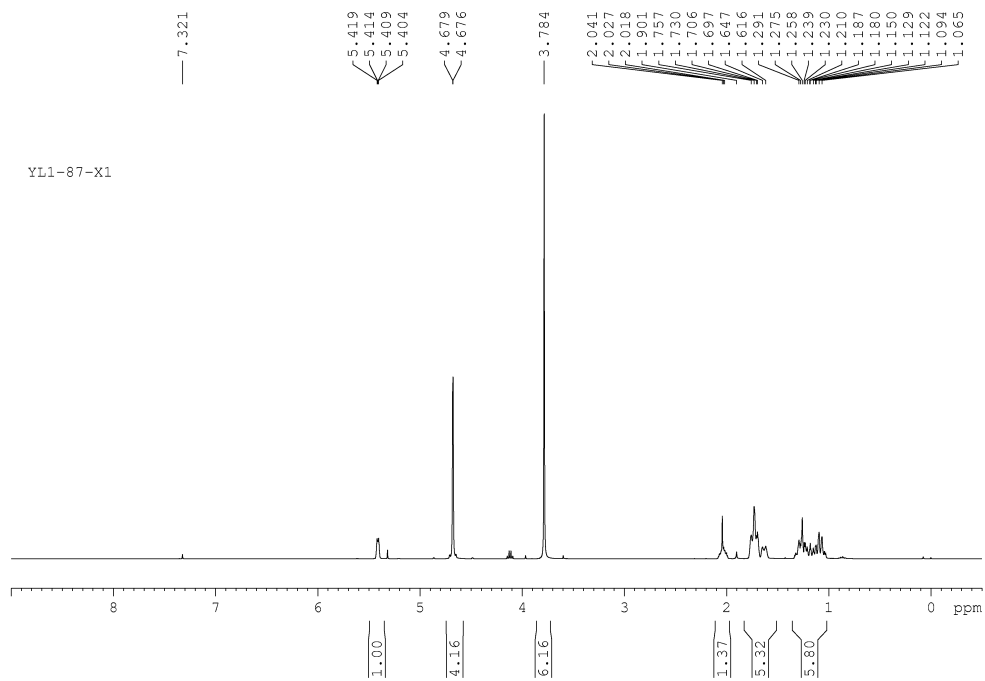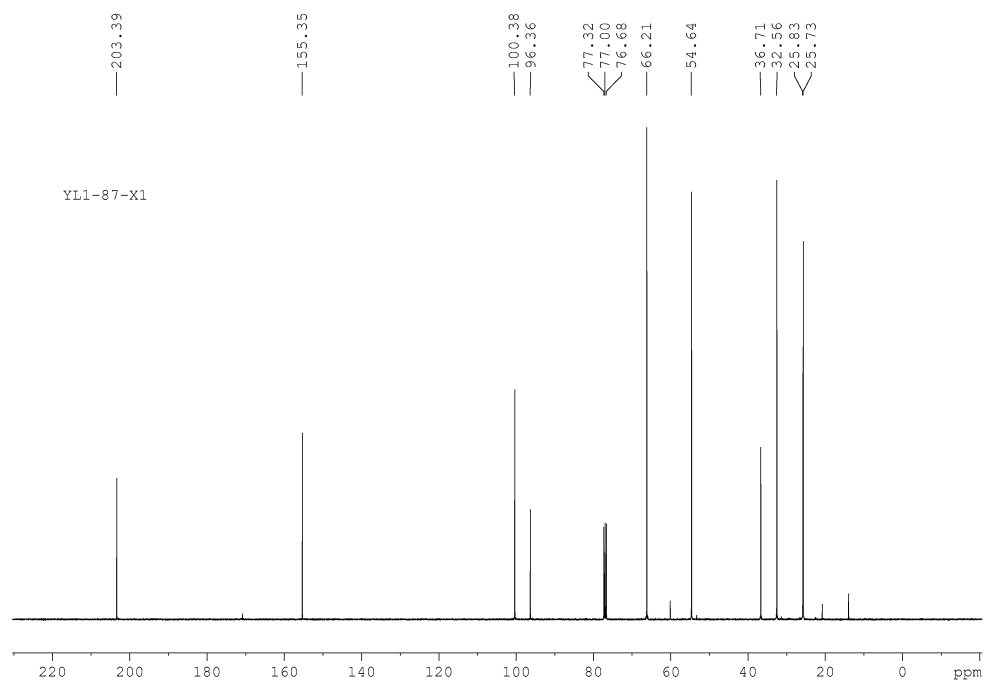

# NMR spectra of 3

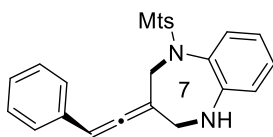

3a

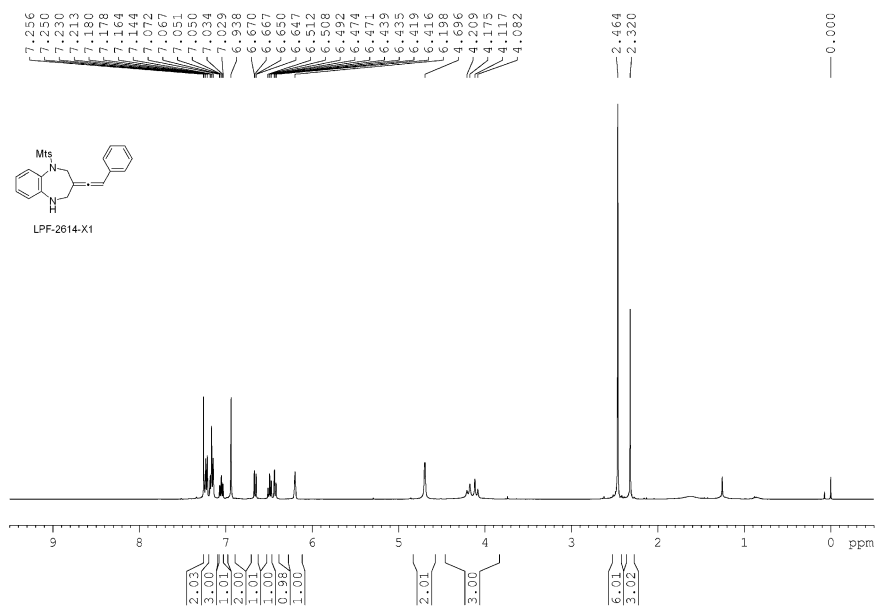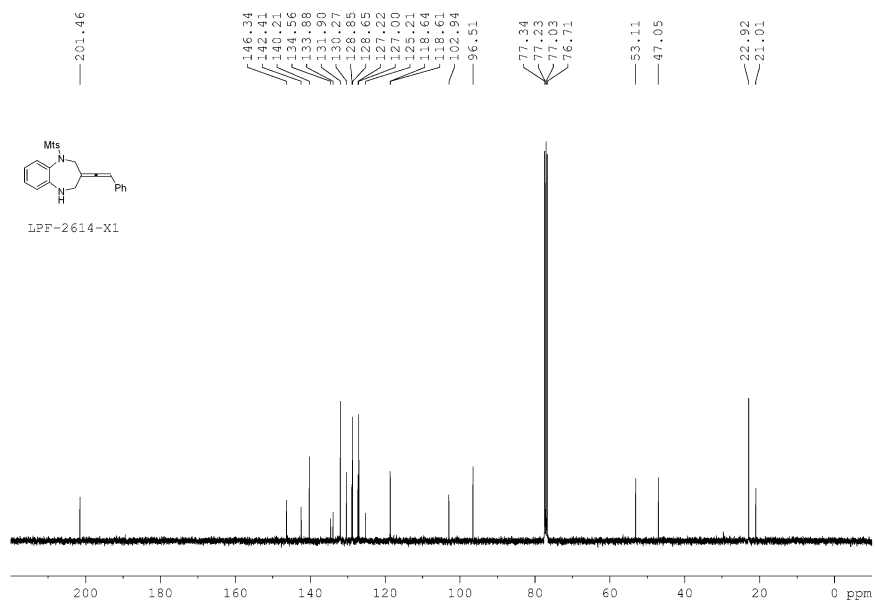



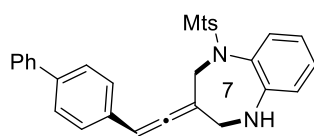

**3c**

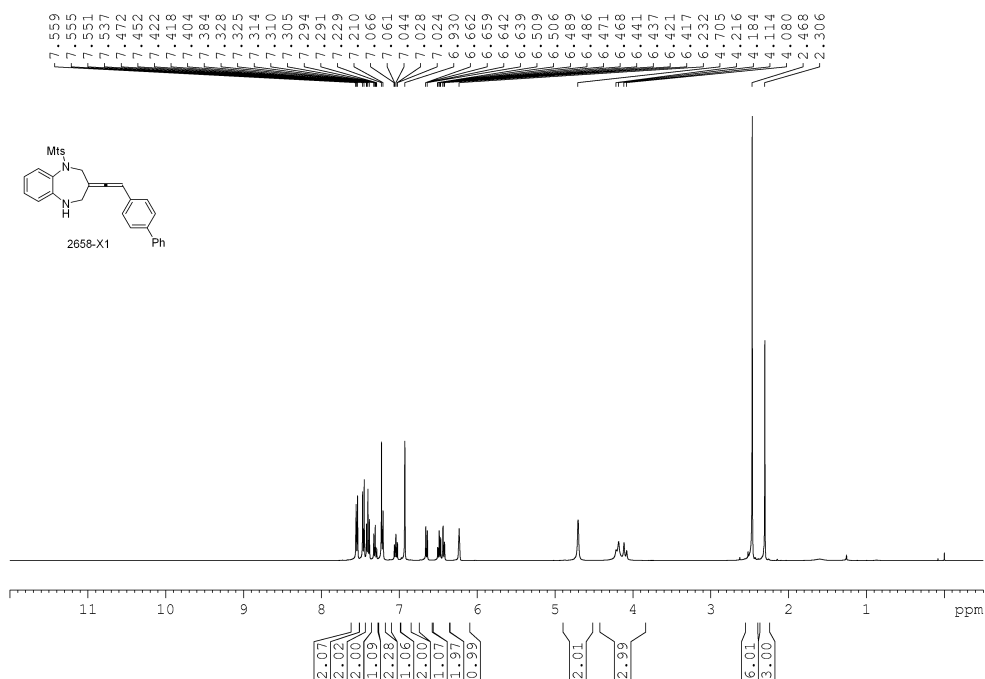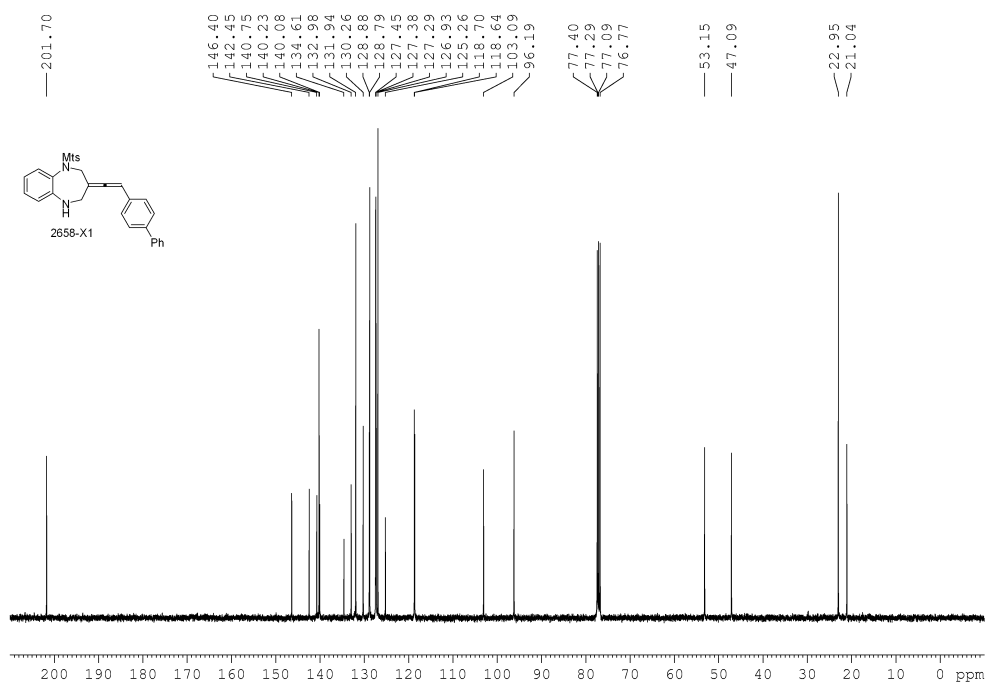

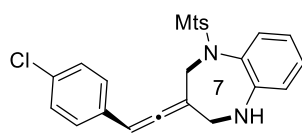

**3d**

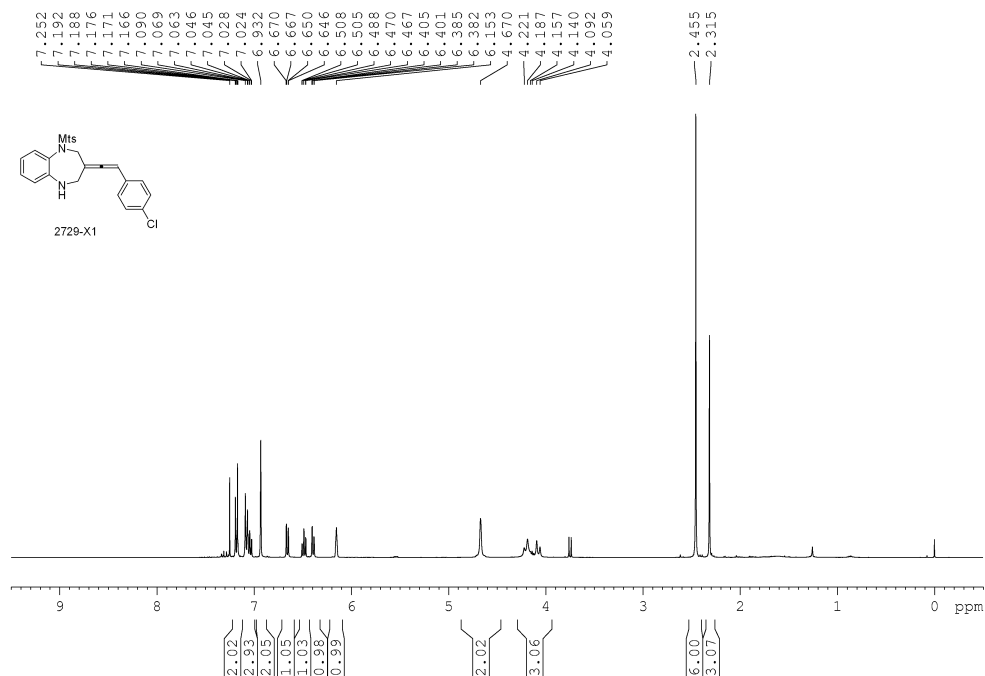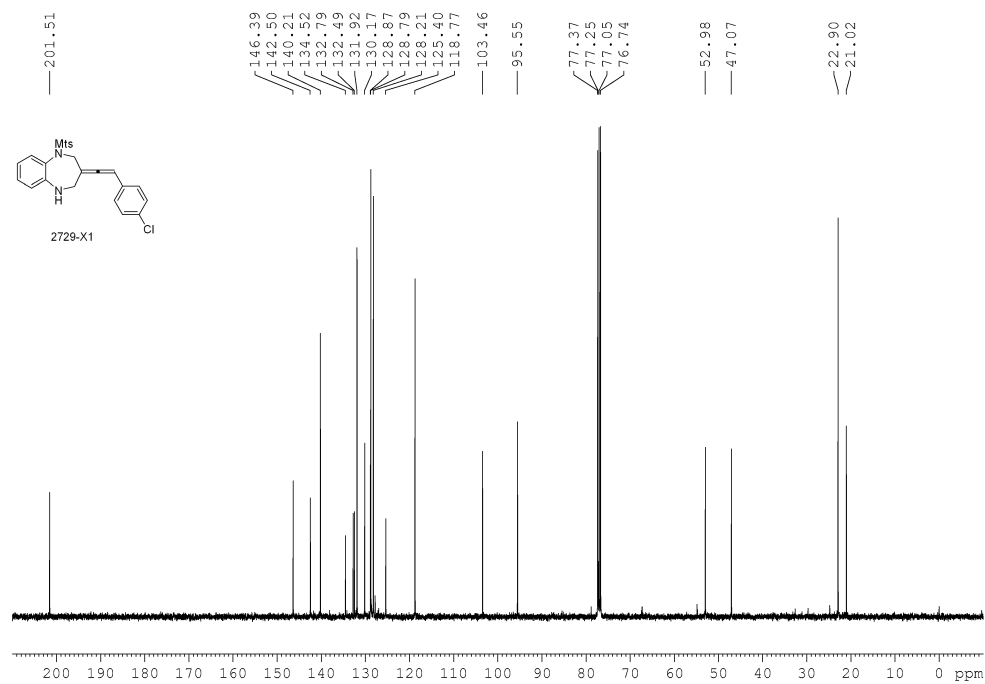

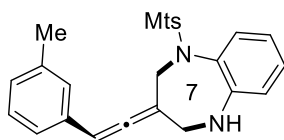

**3e**

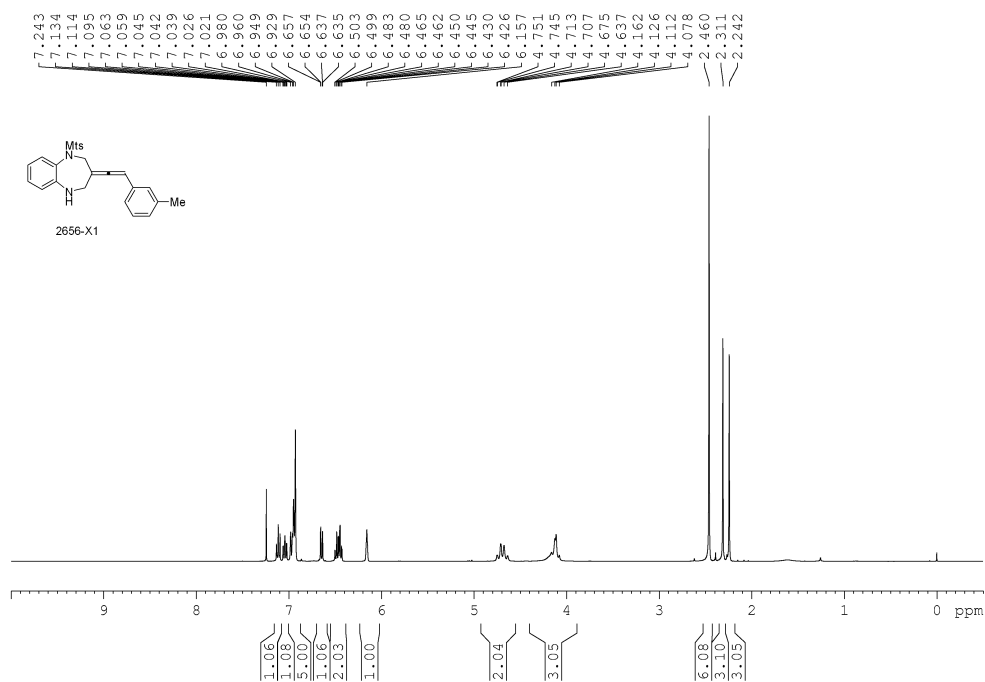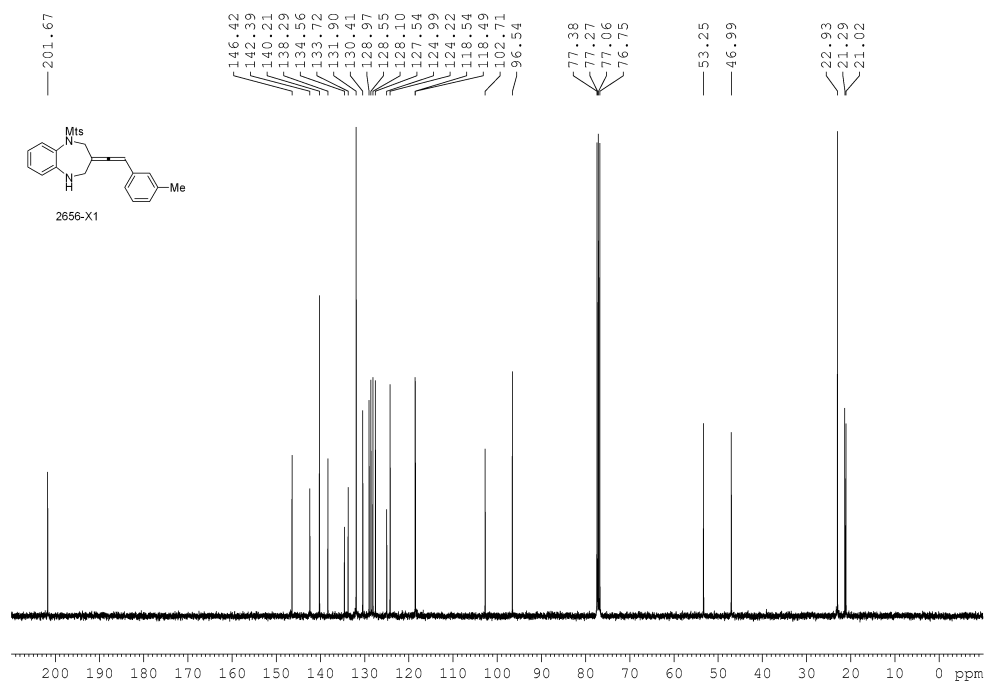

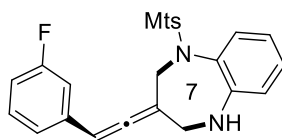

**3f**

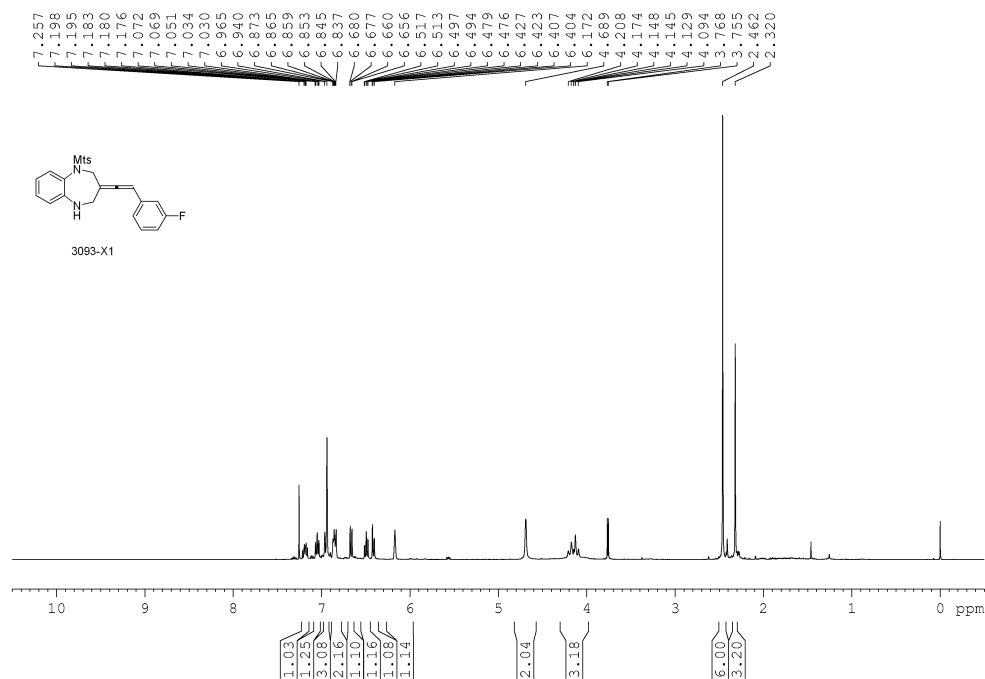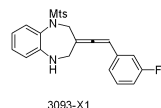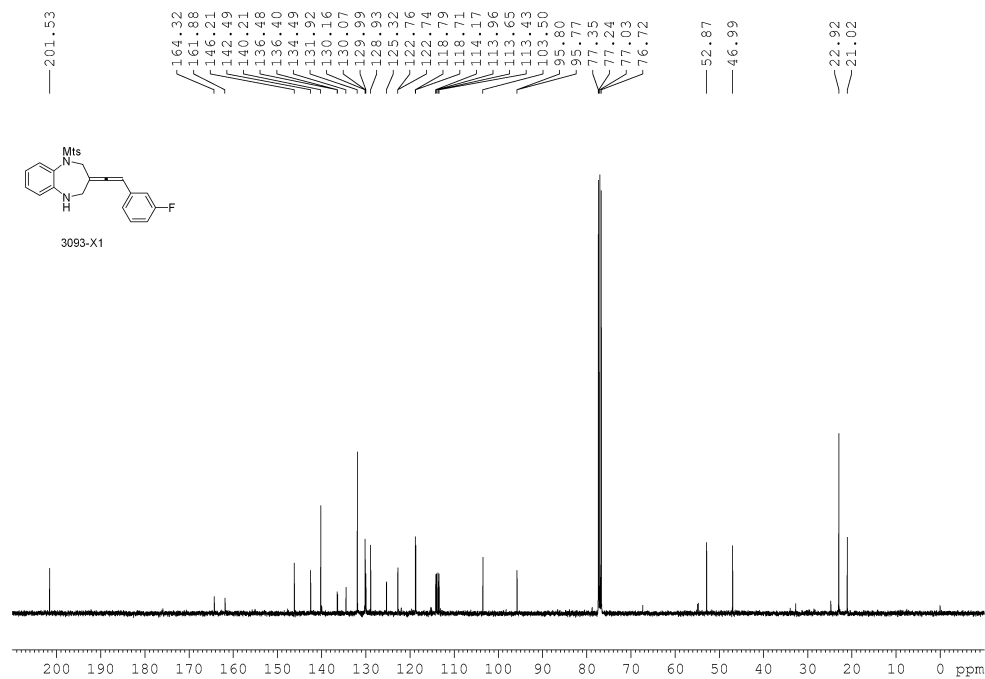

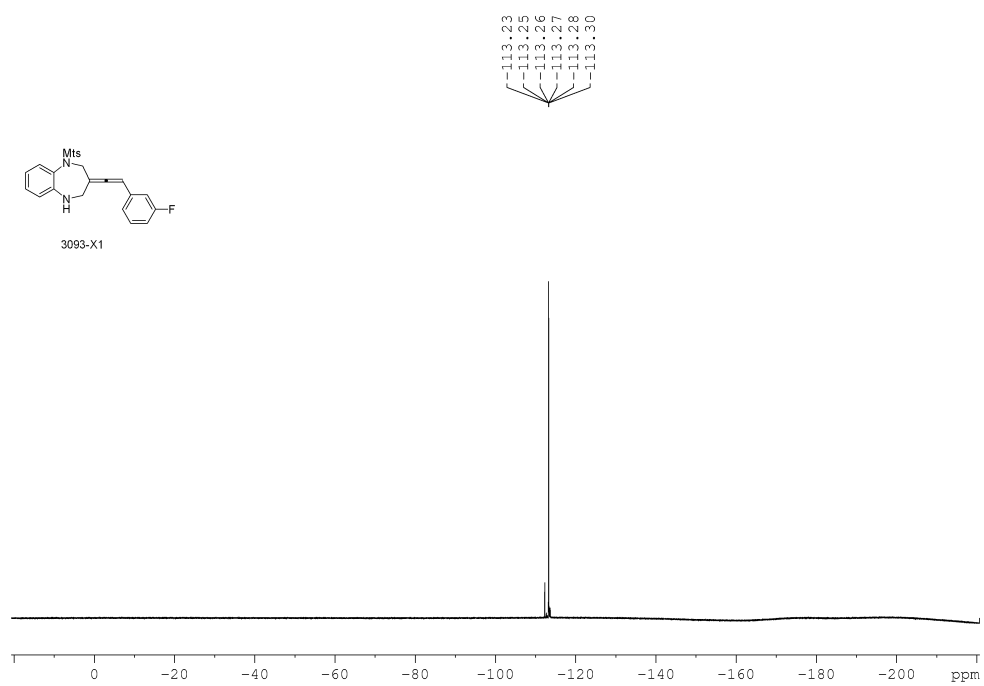

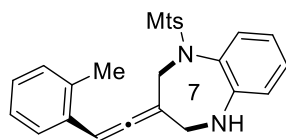

**3g**

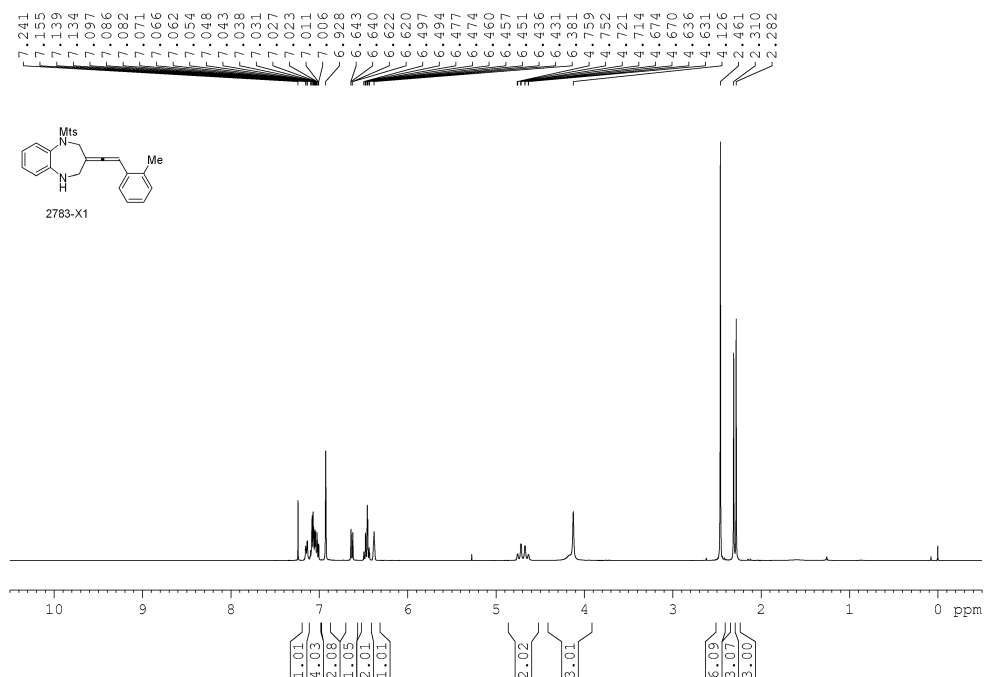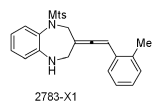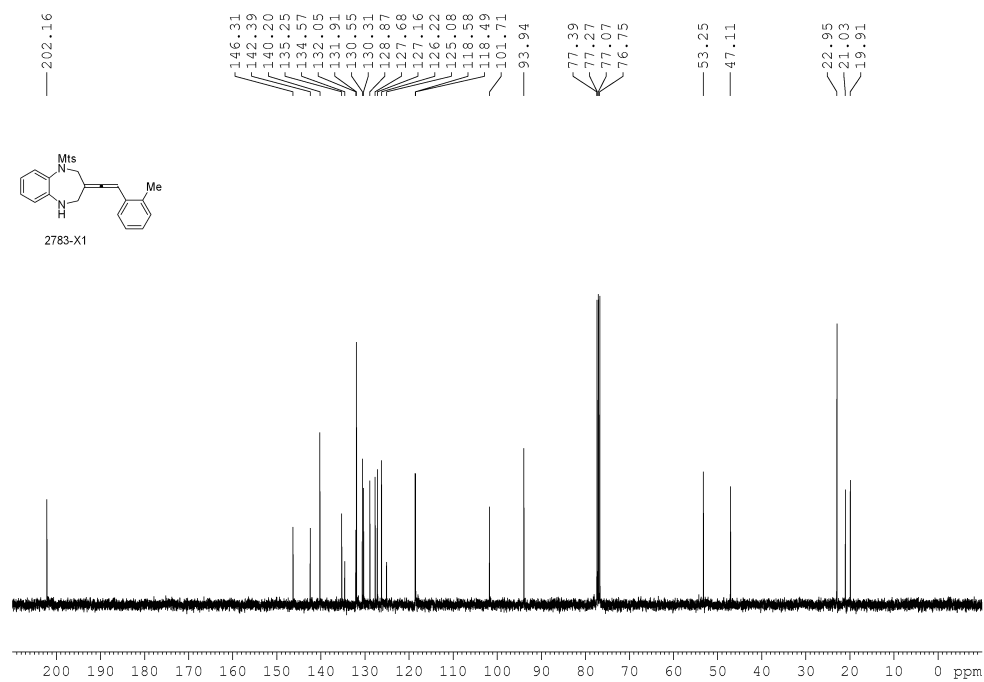

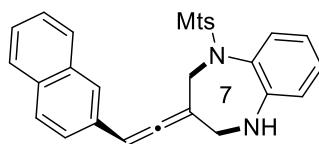

3h

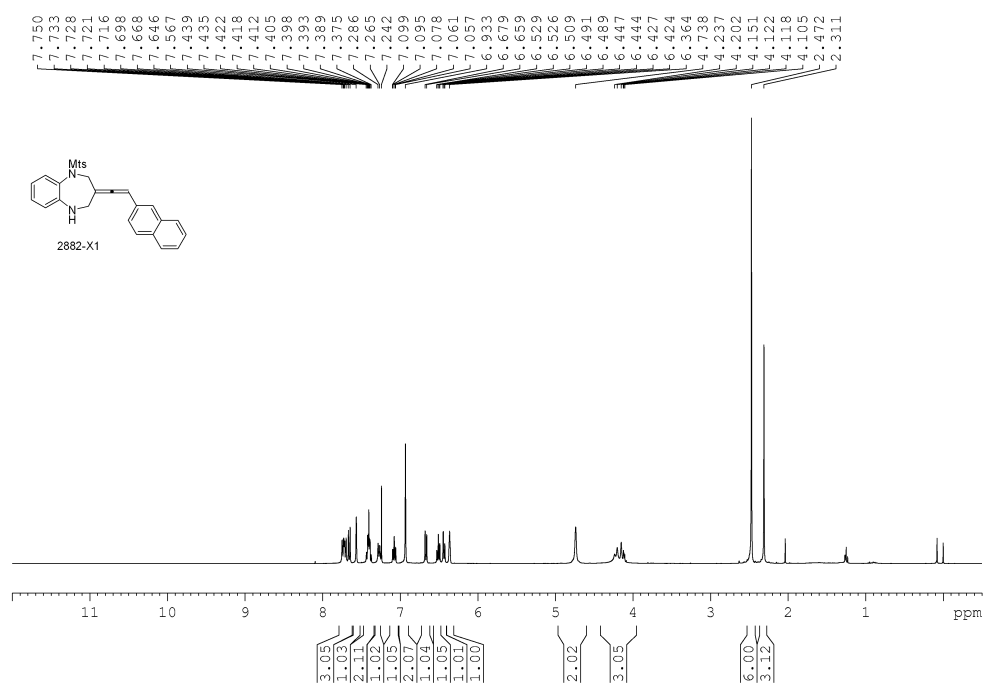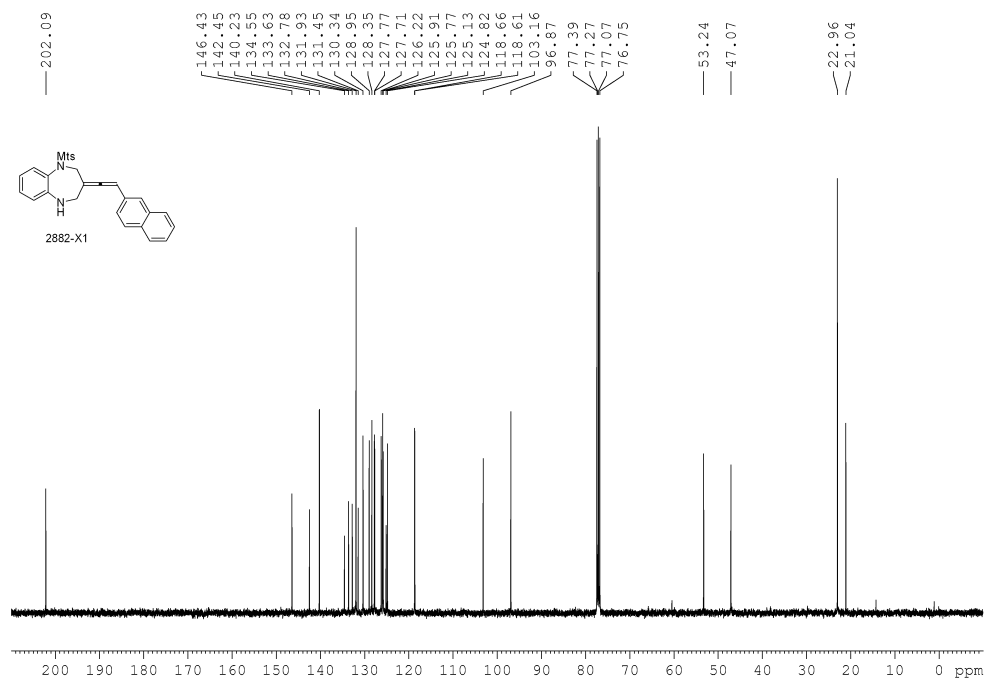

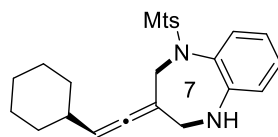

**3i**

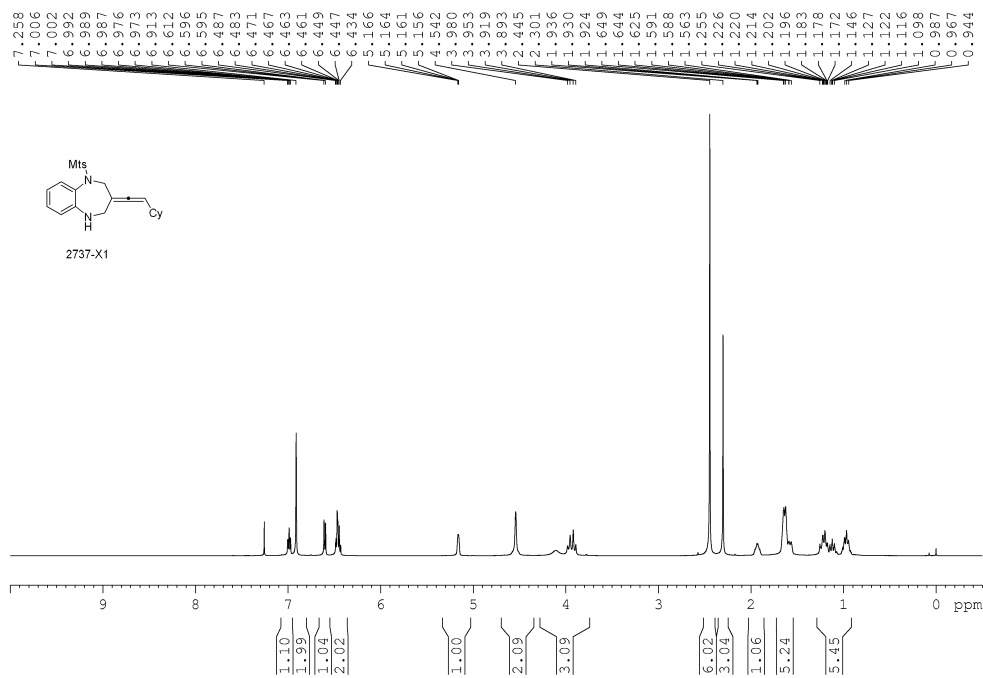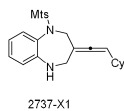

**2737-X1**

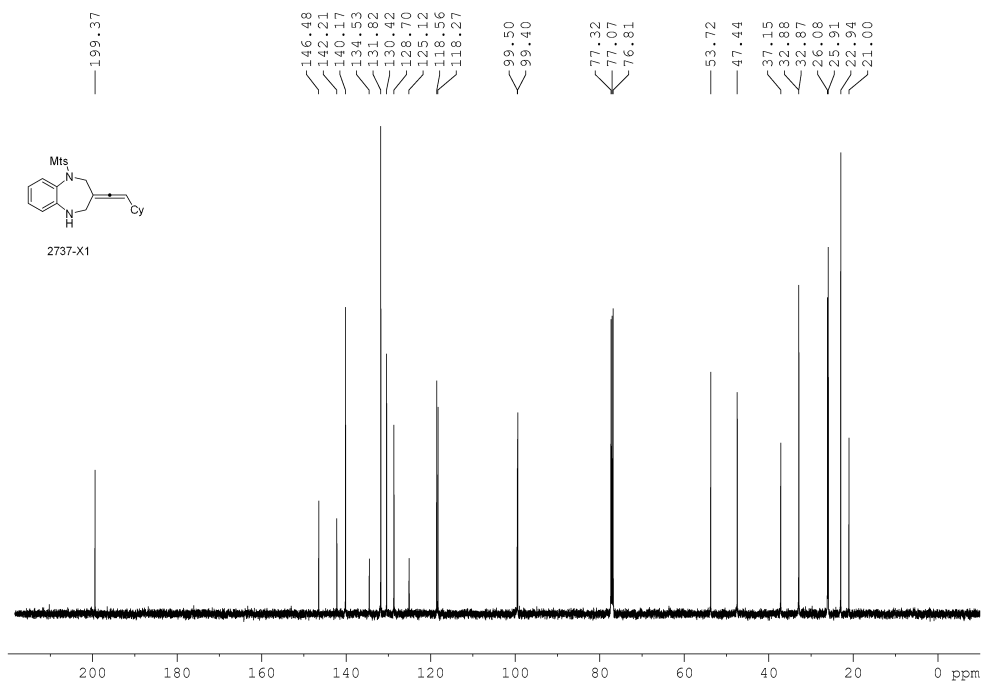

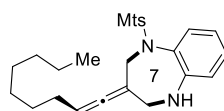

3j

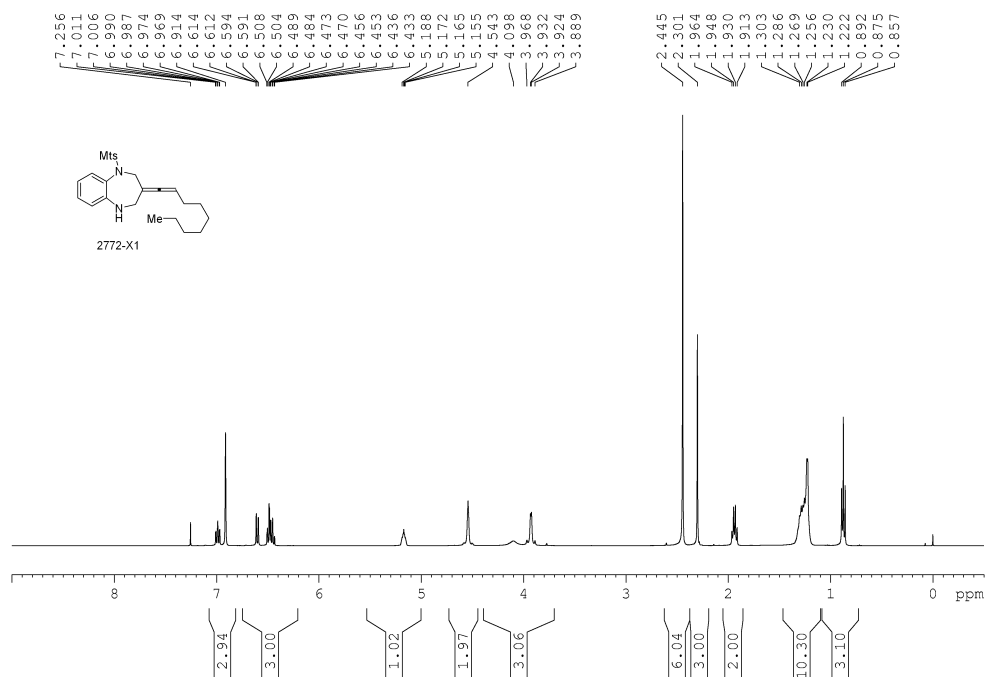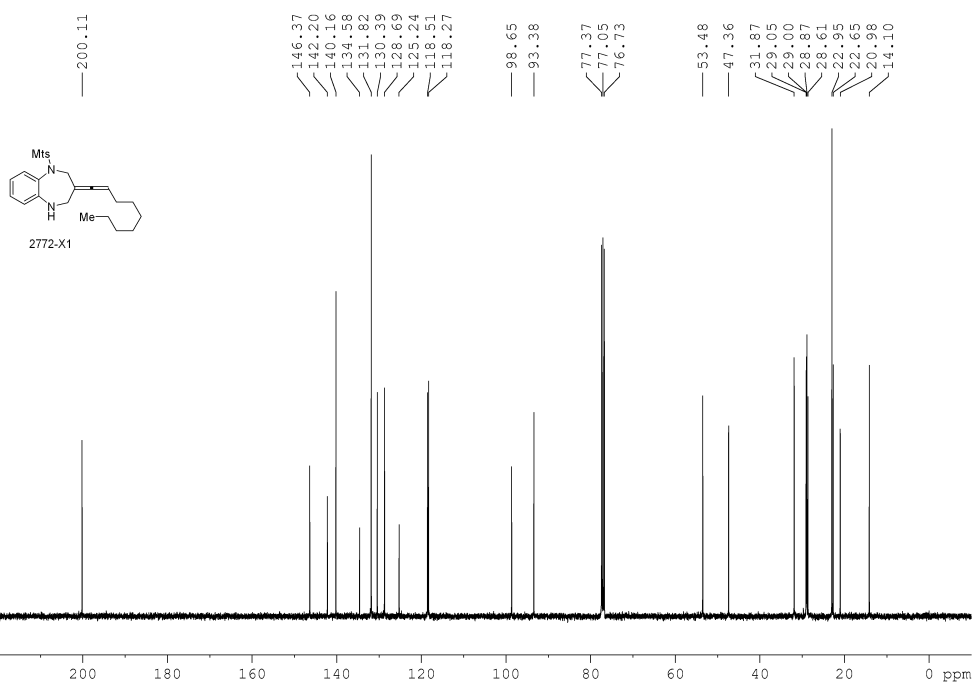

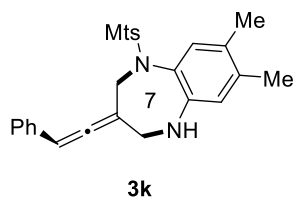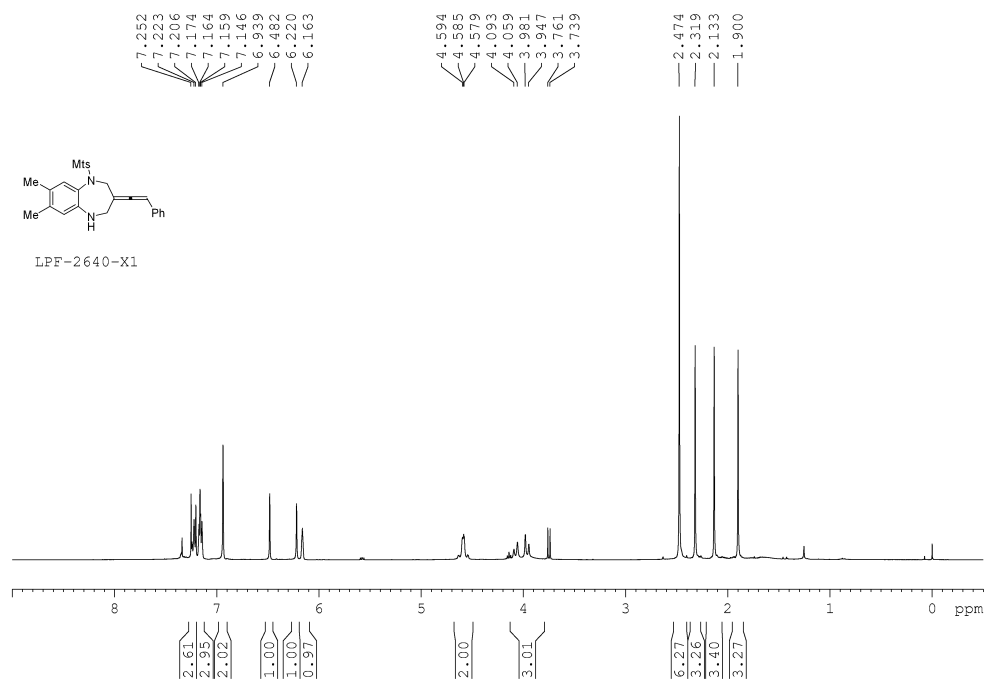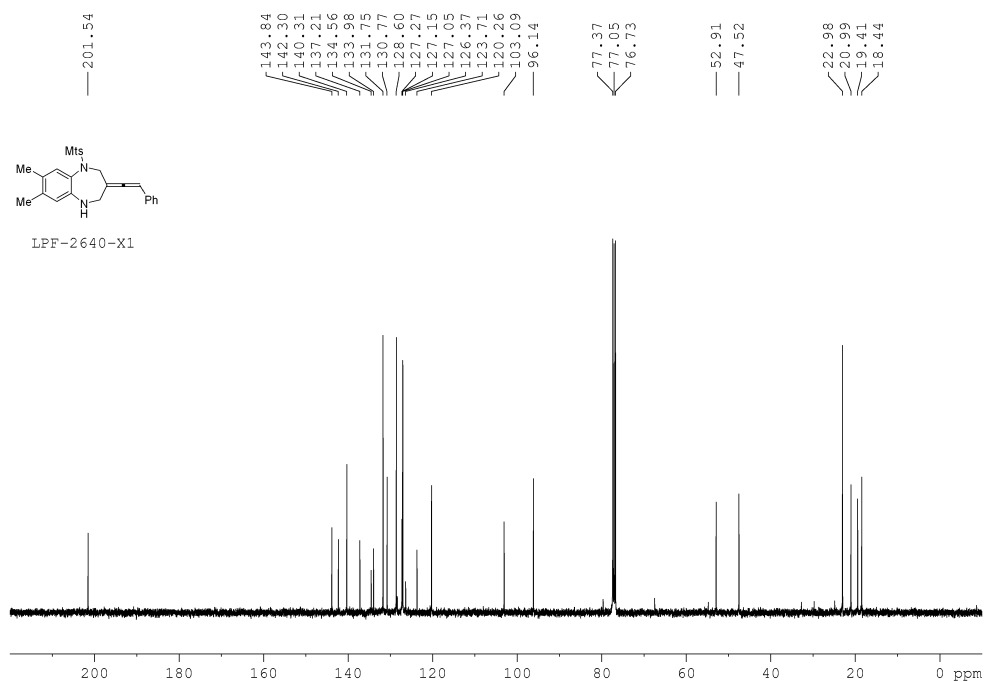

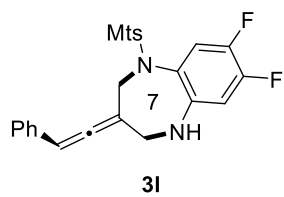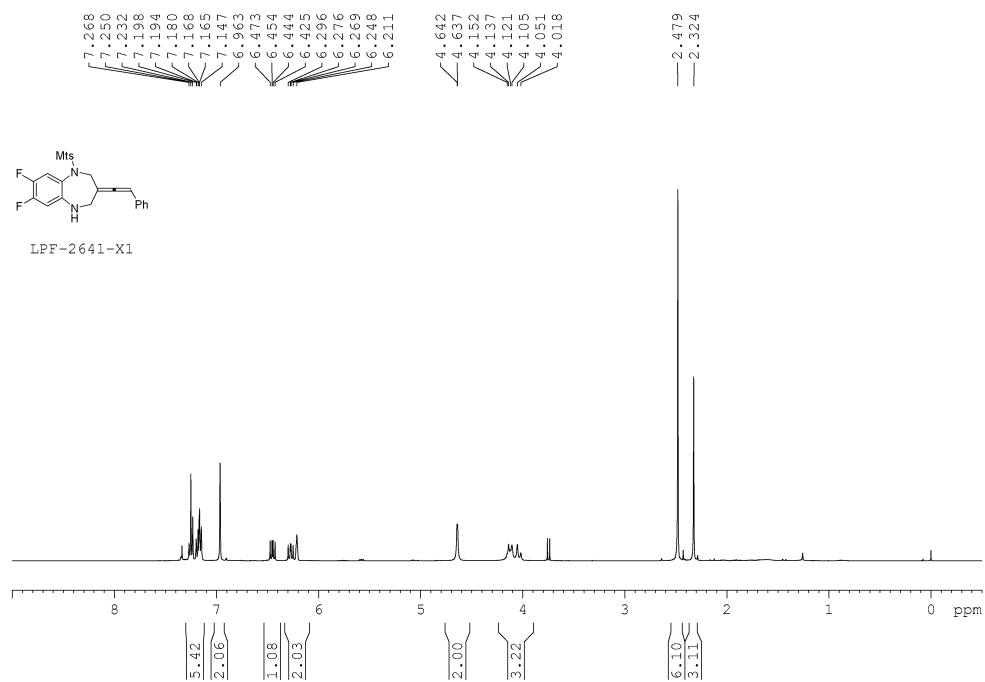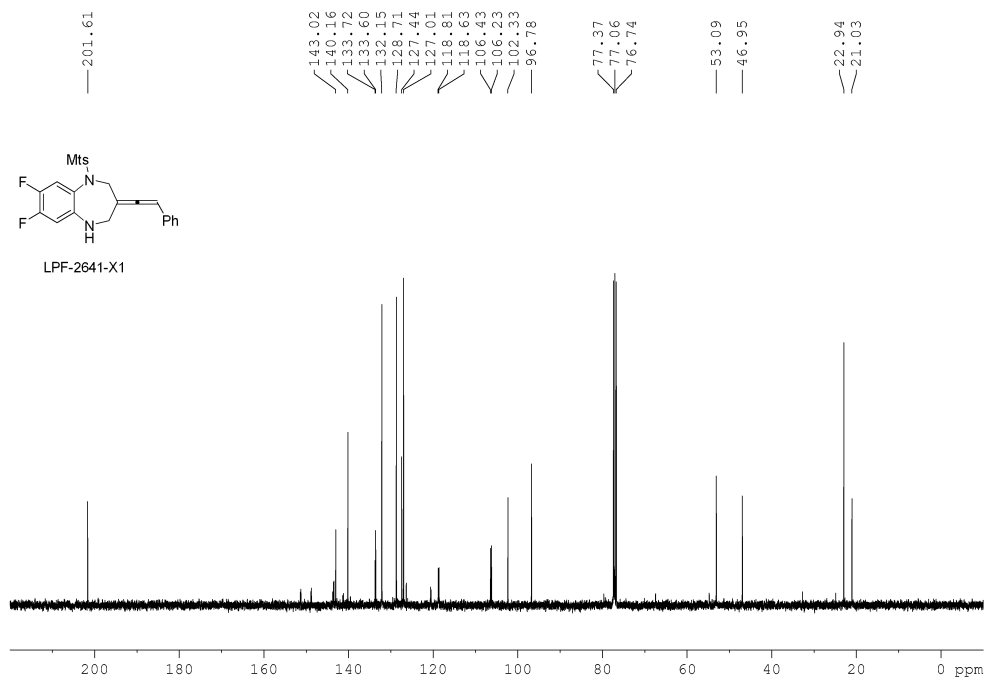

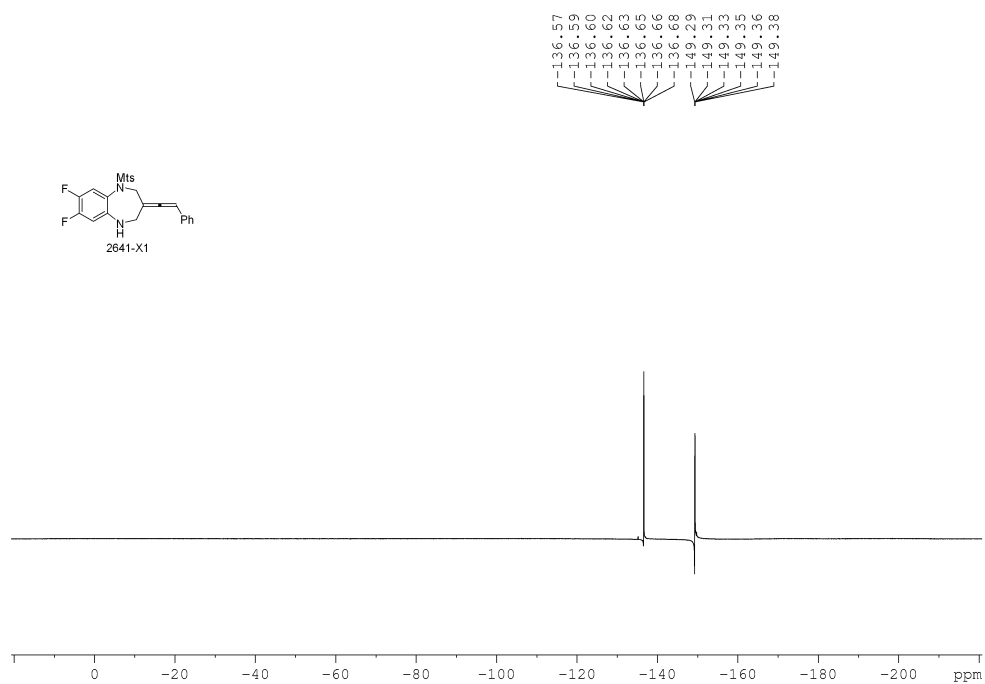

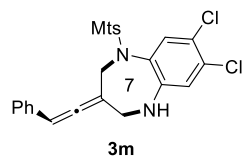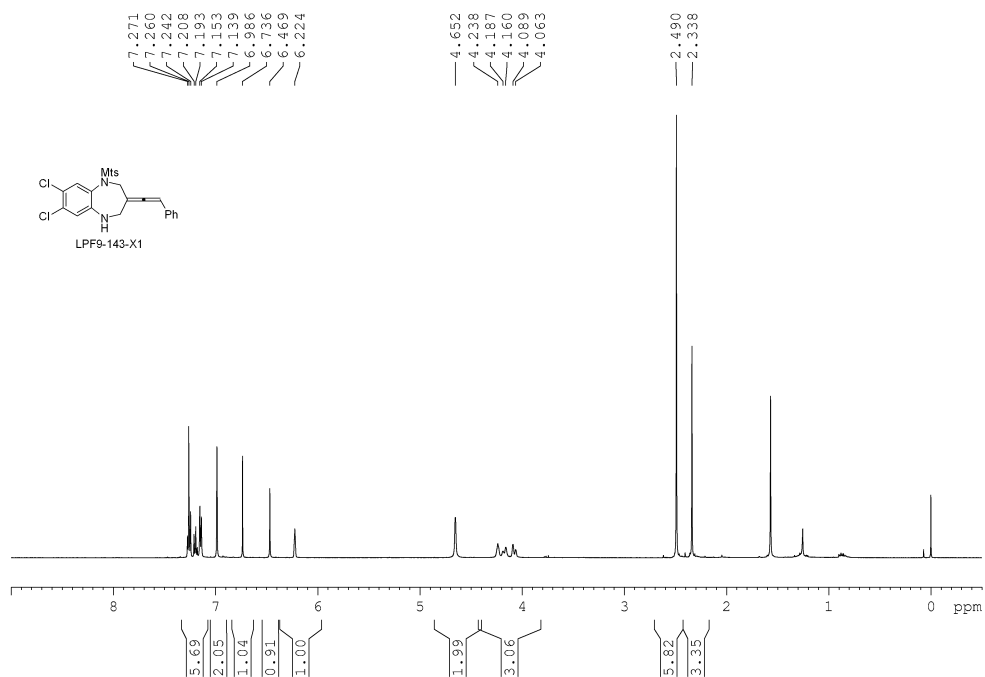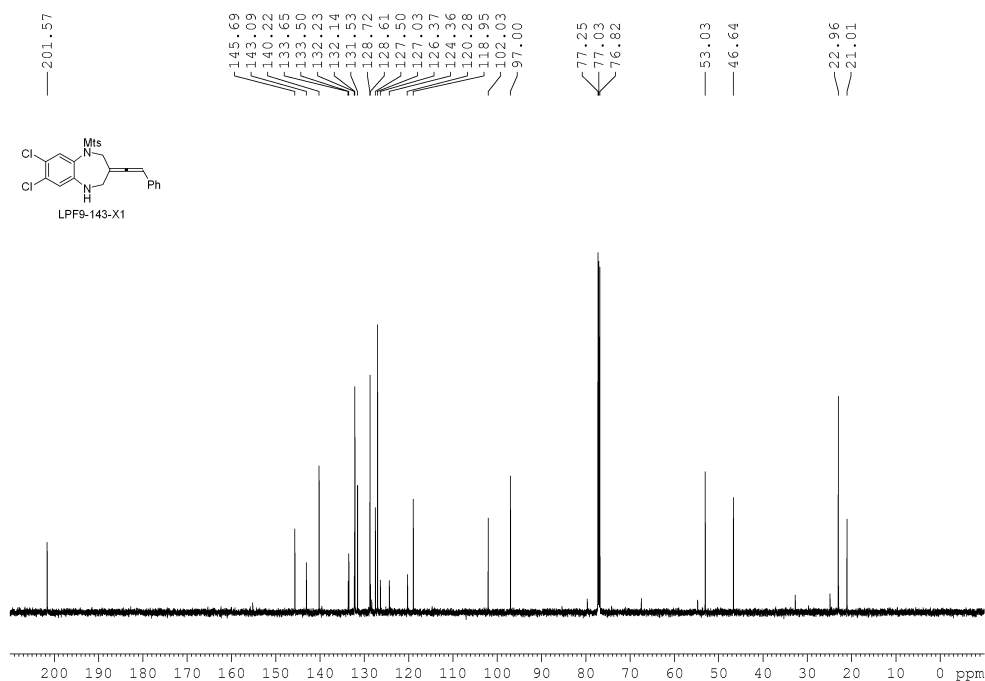

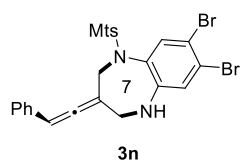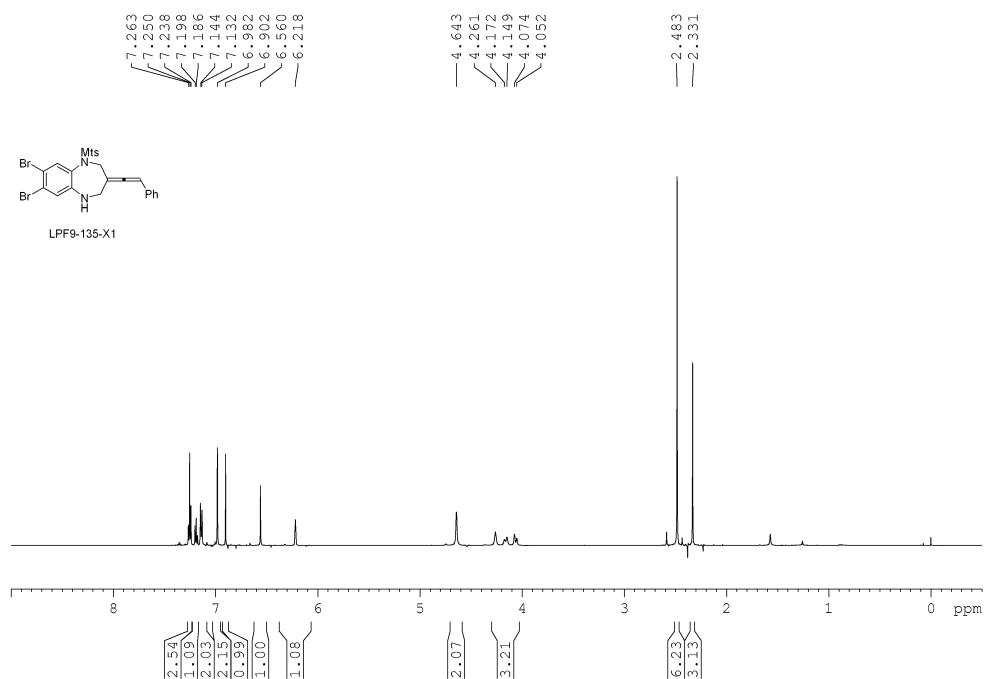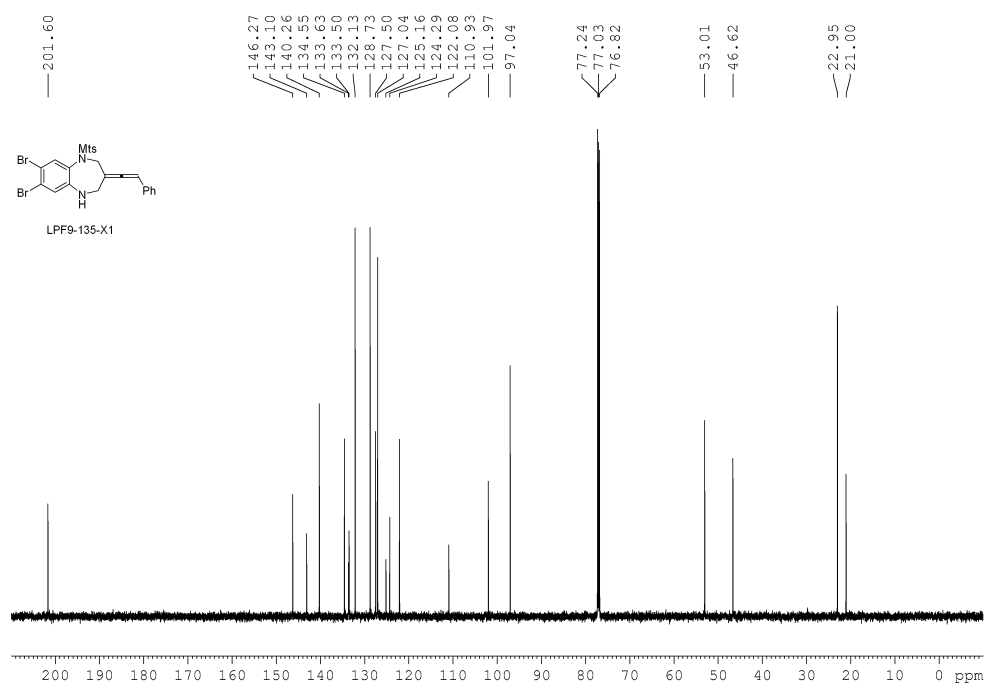

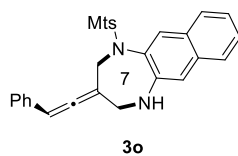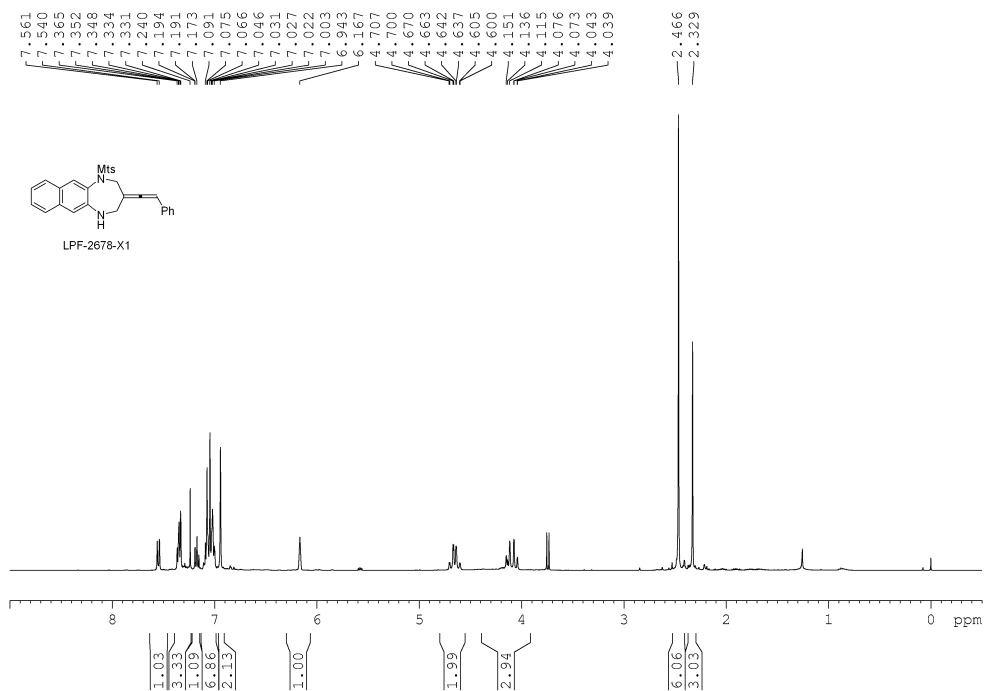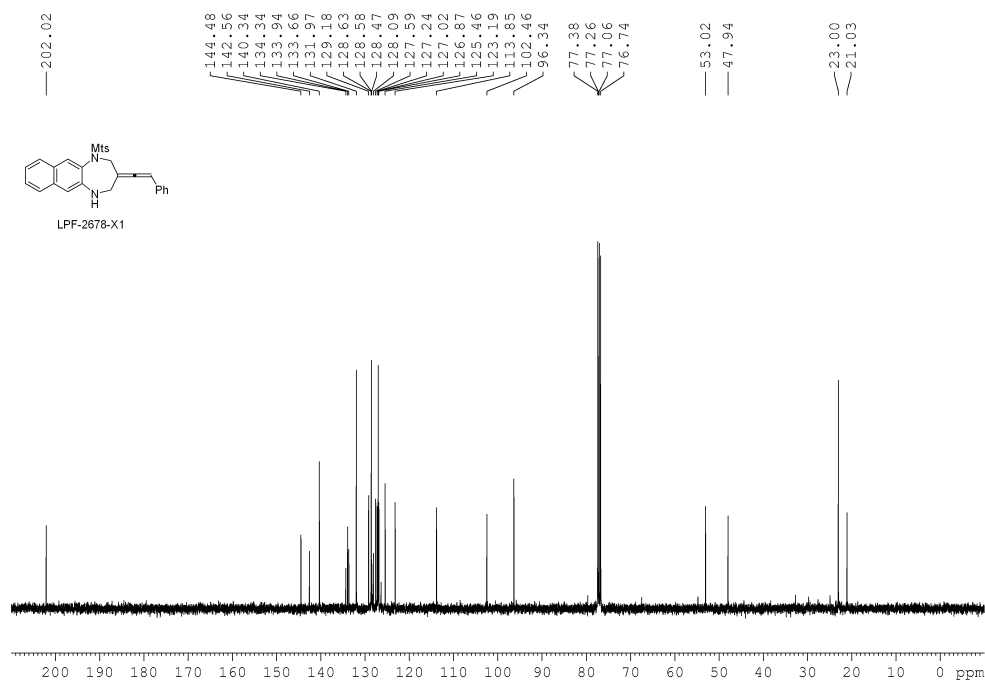

# NMR spectra of 4

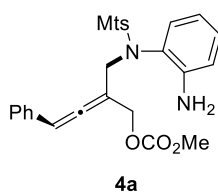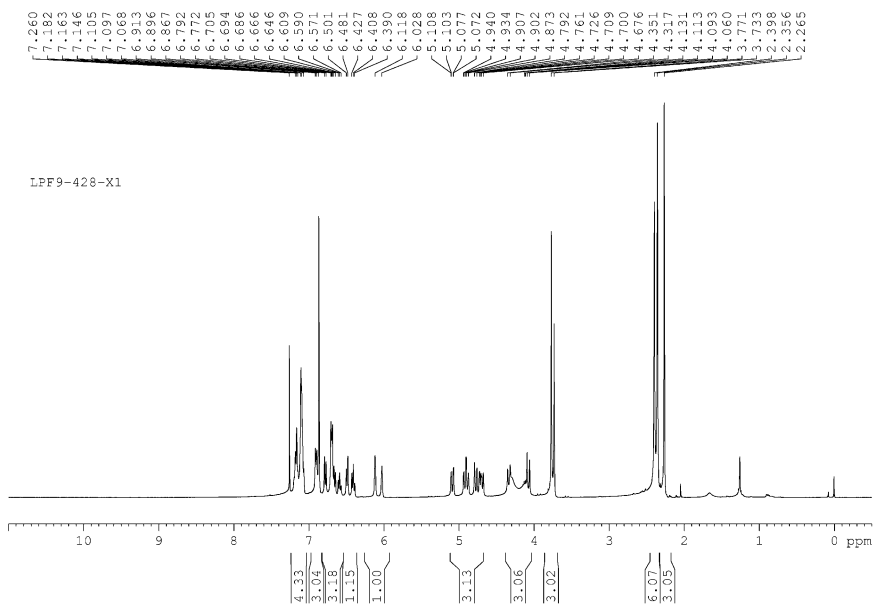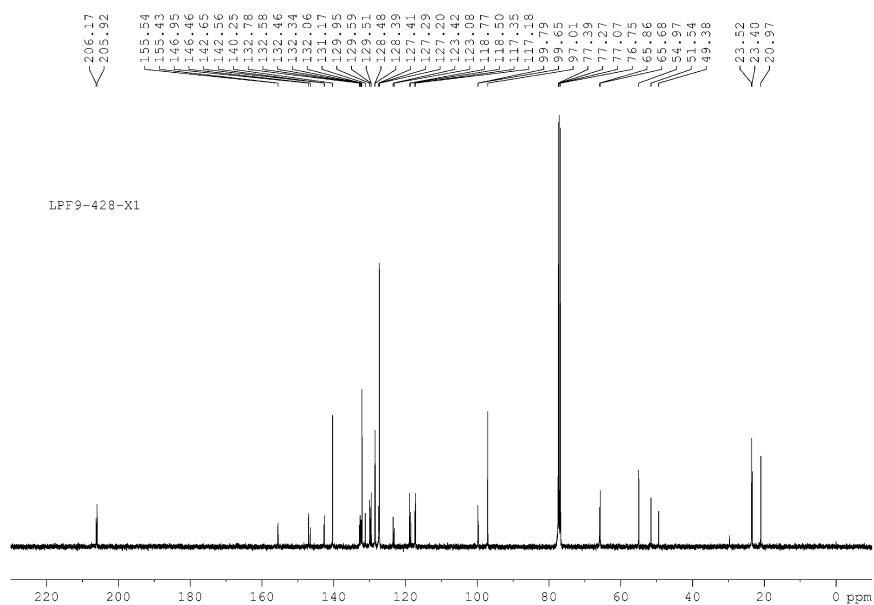

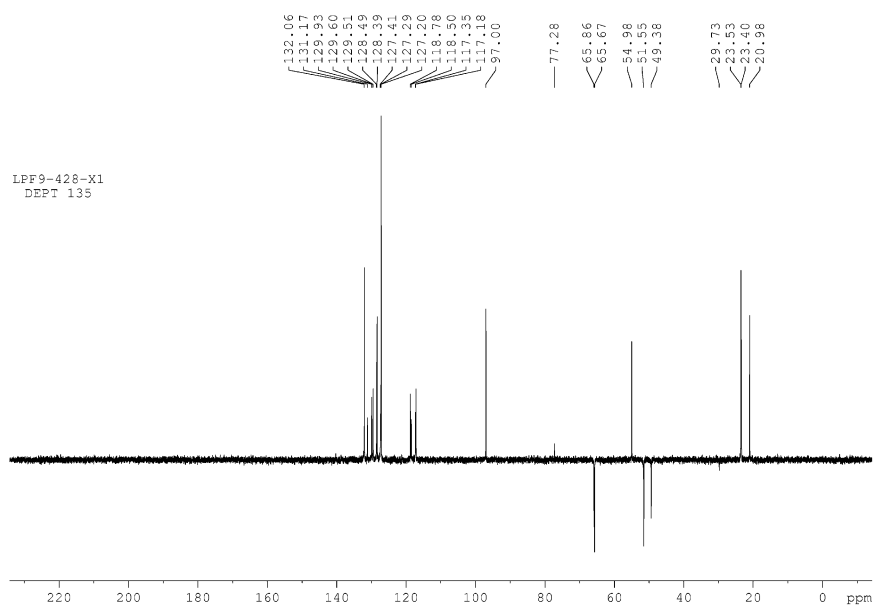

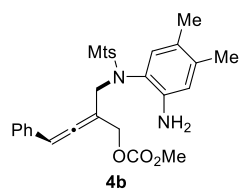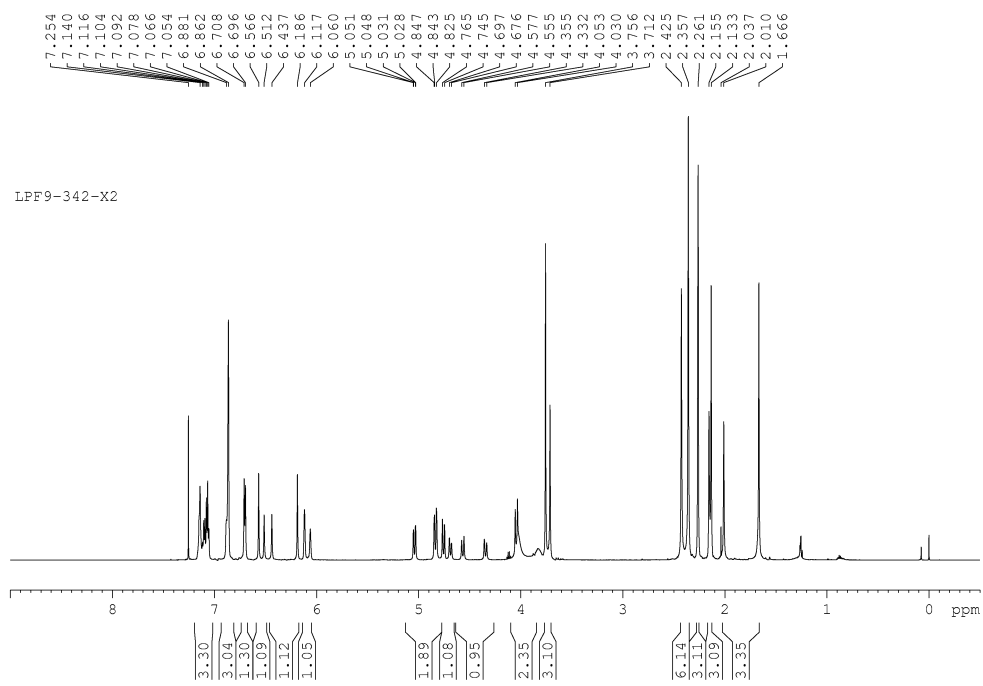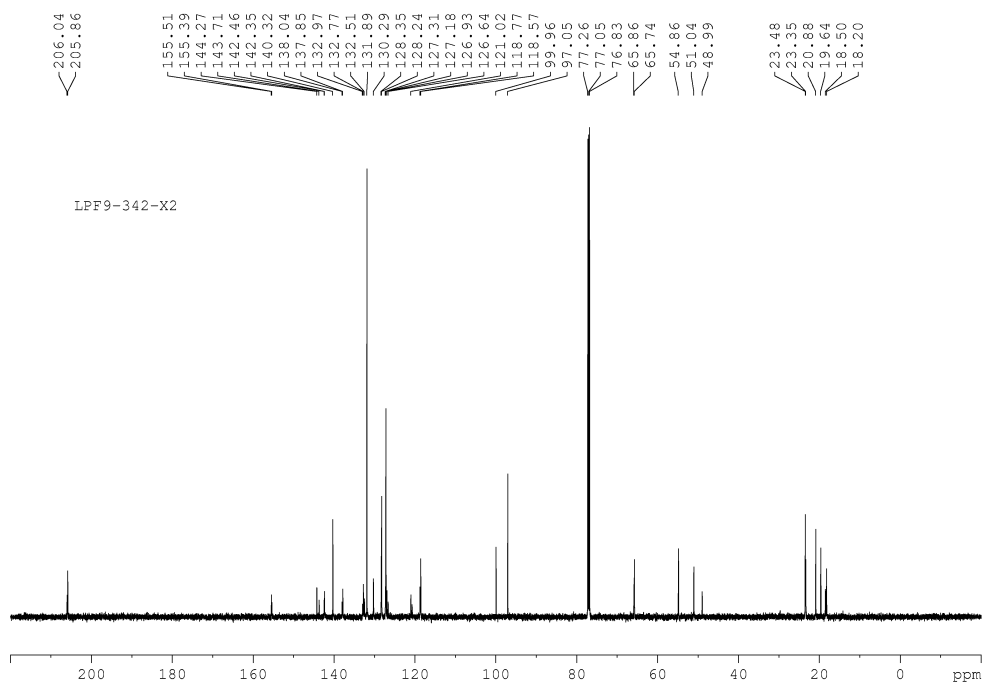

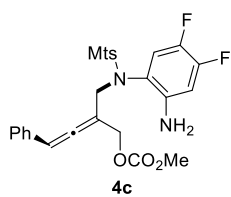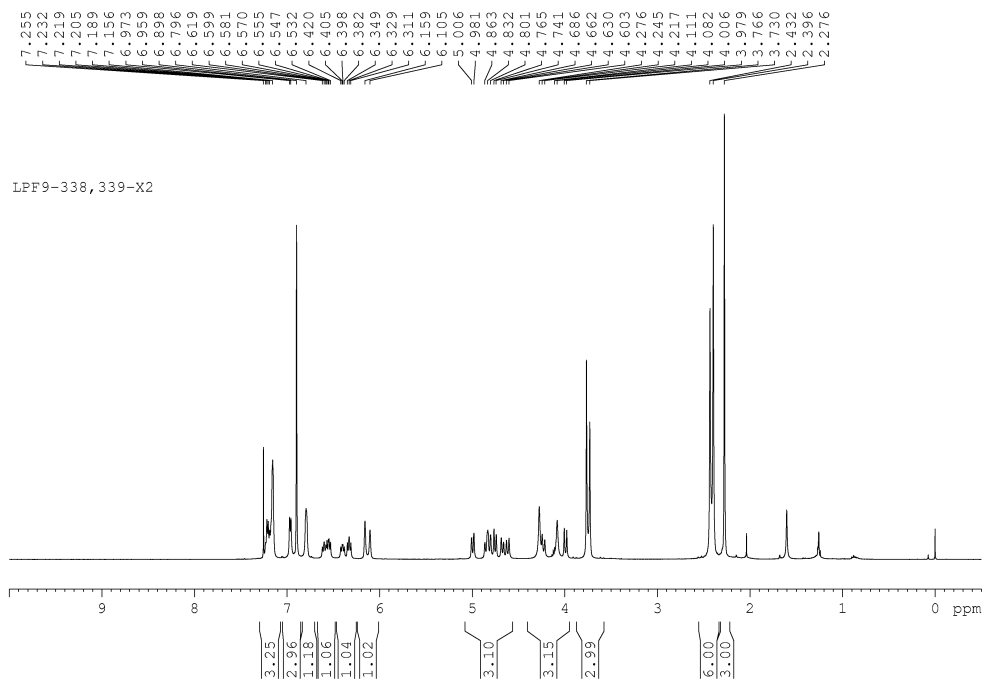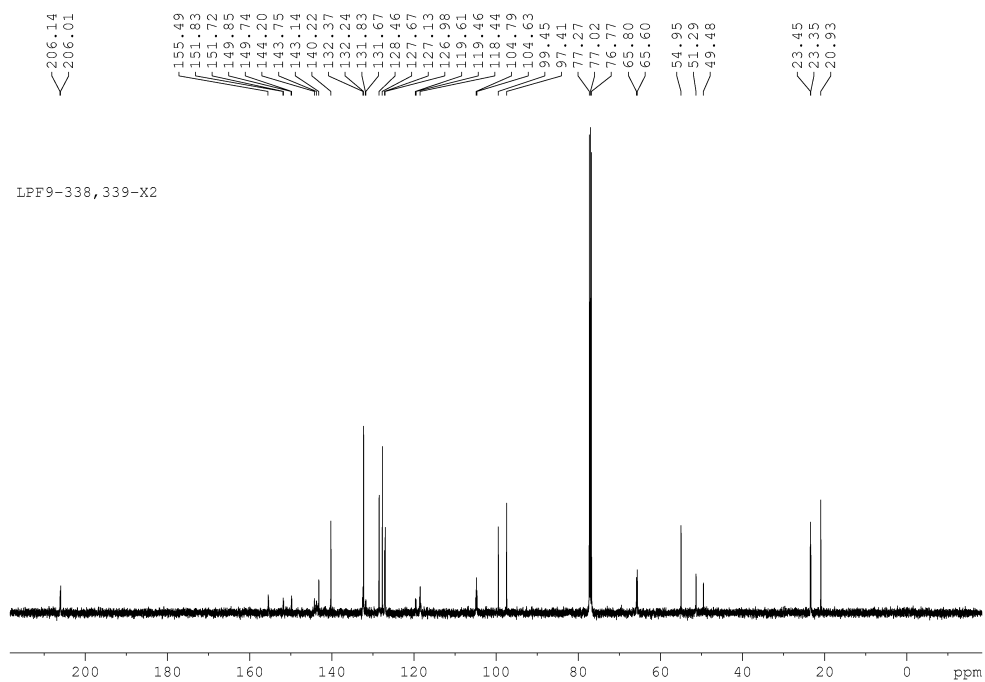

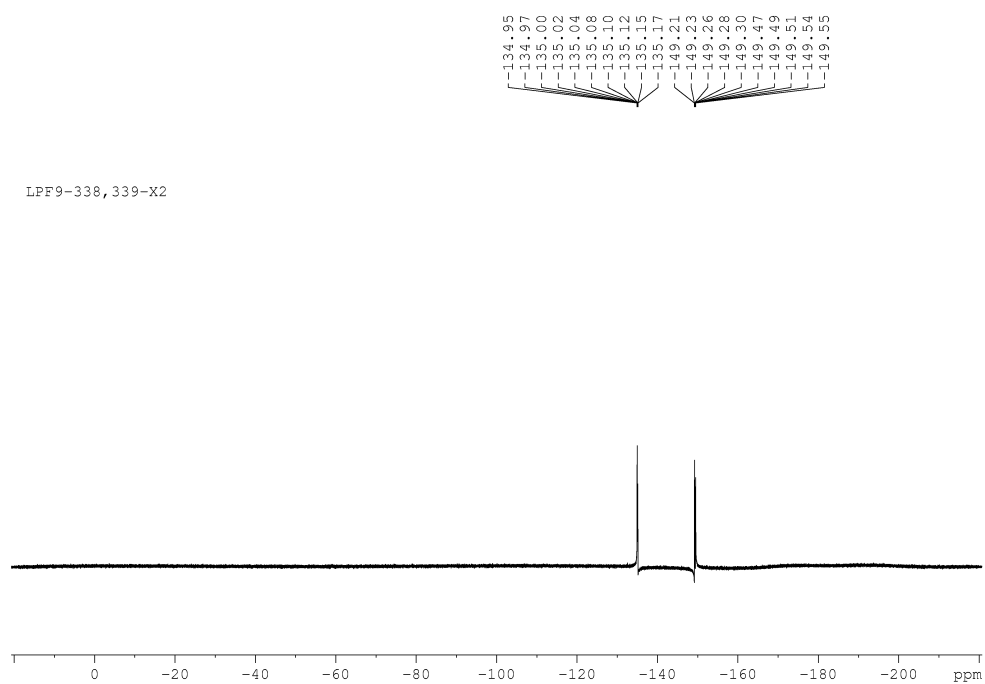

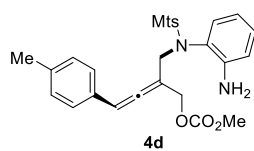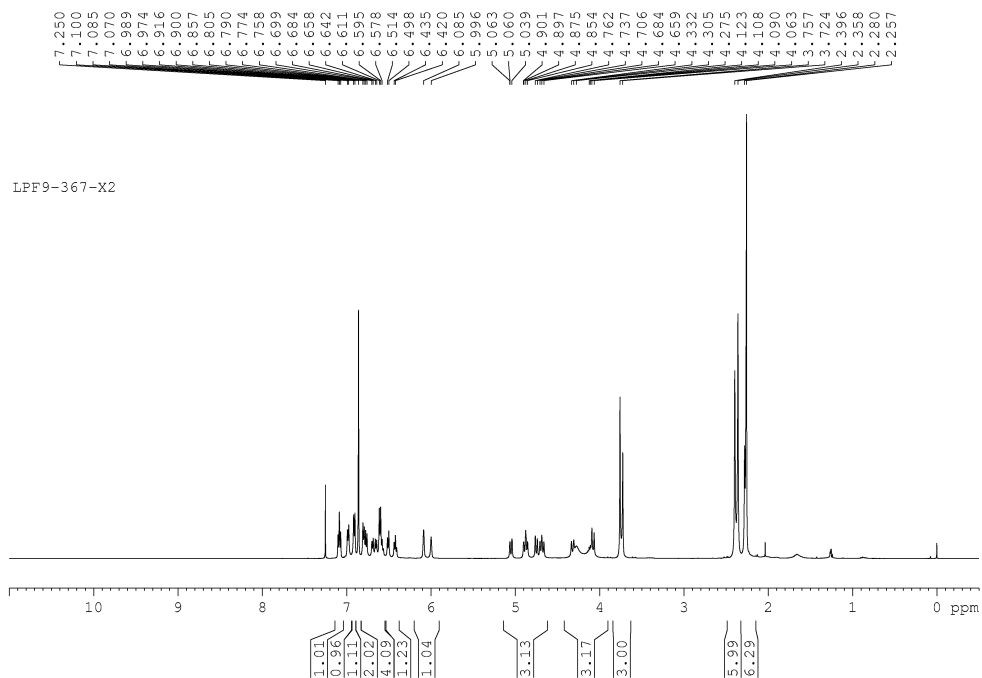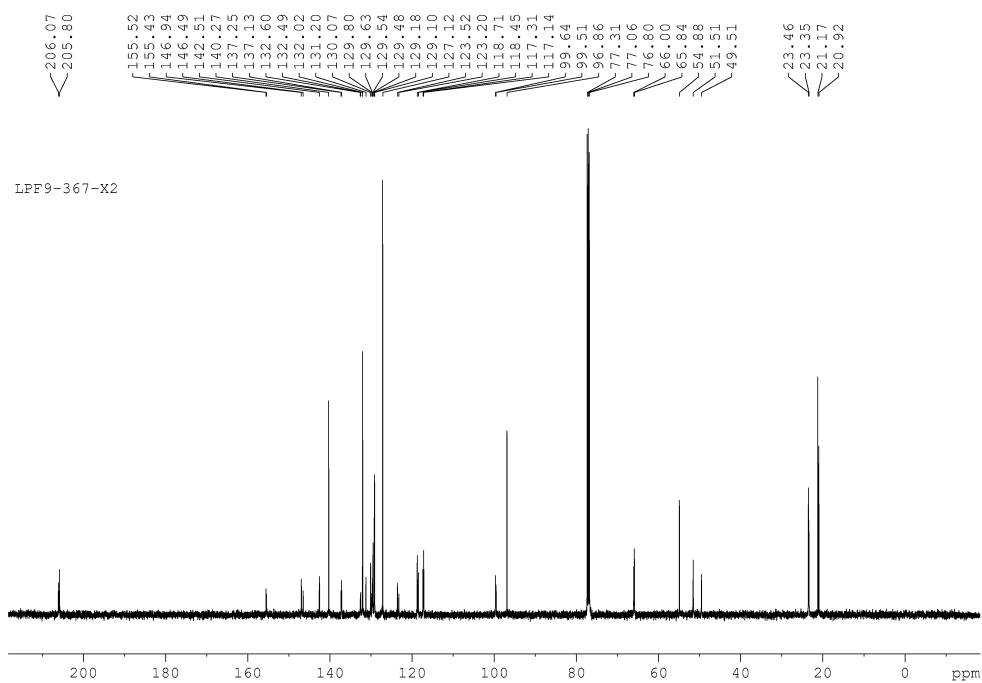

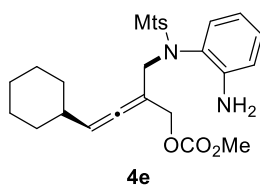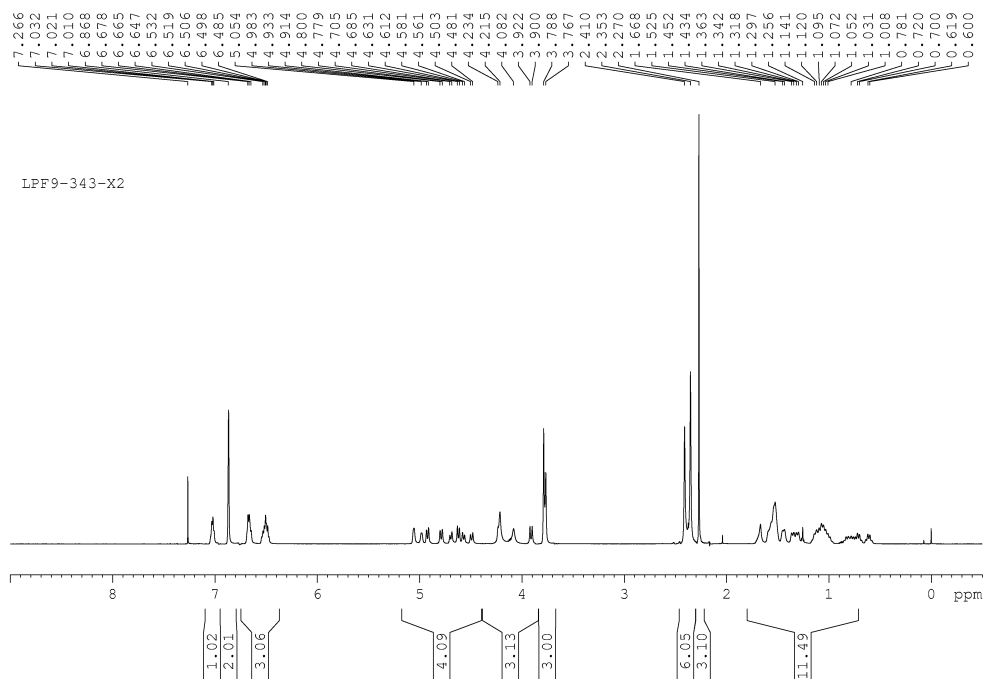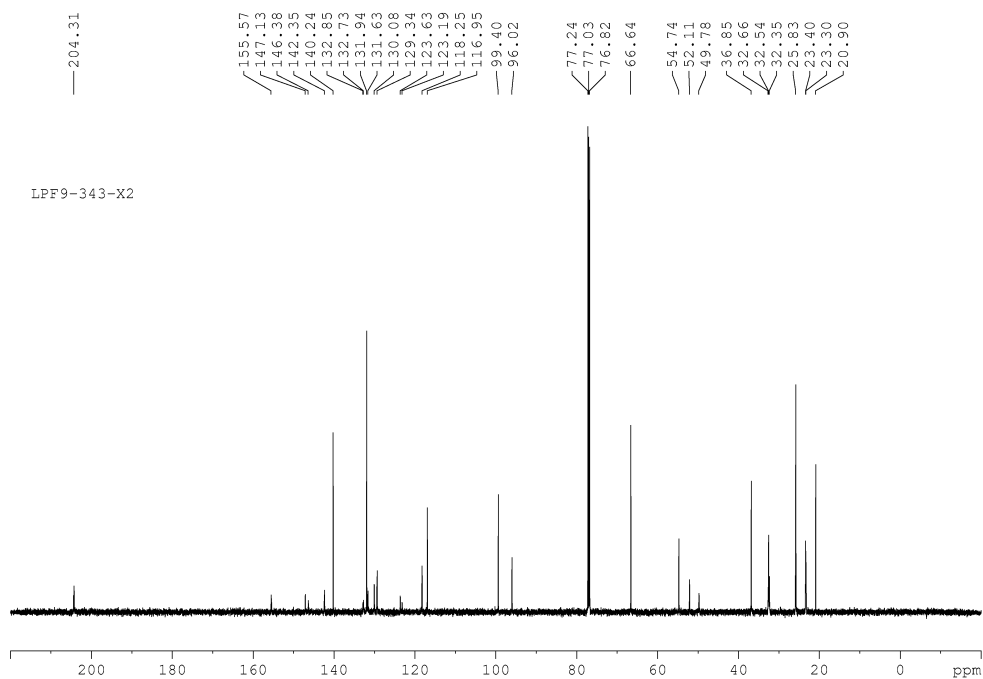

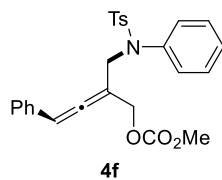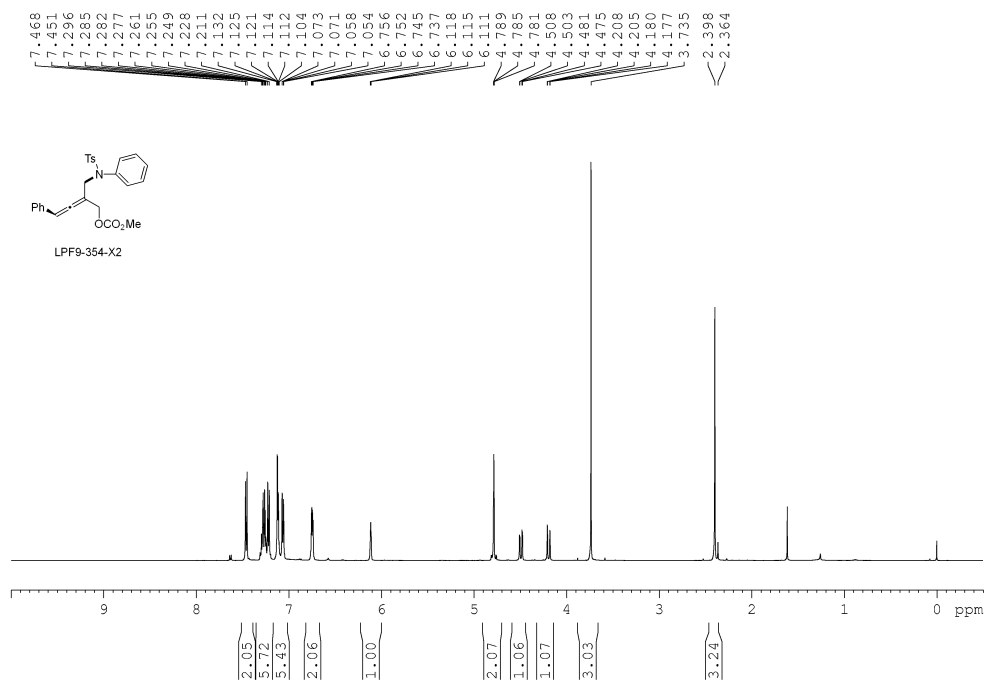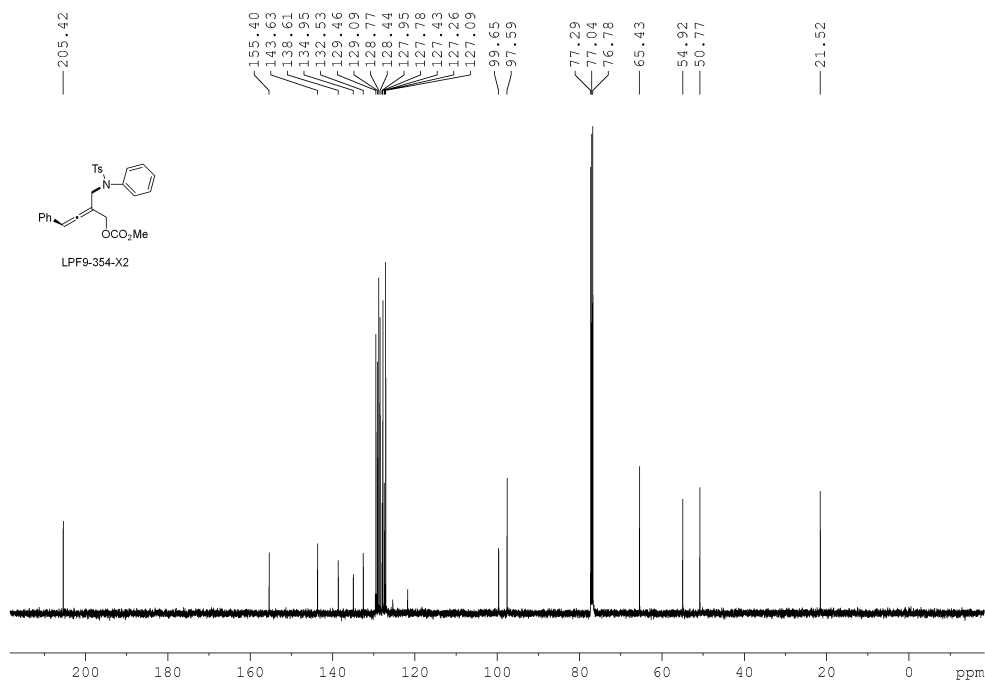

# NMR spectra of 9

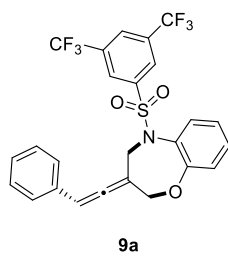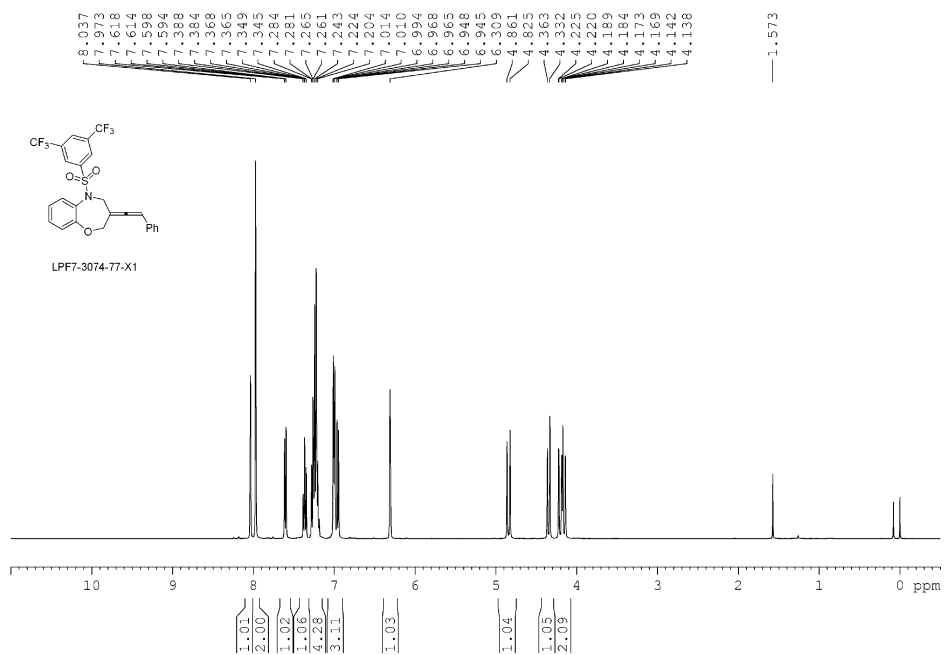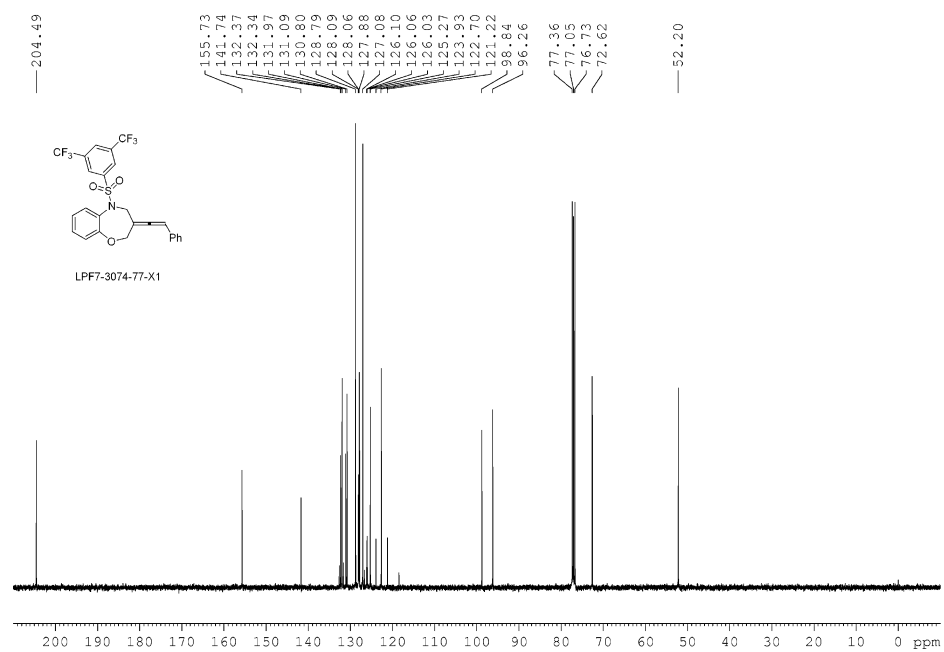

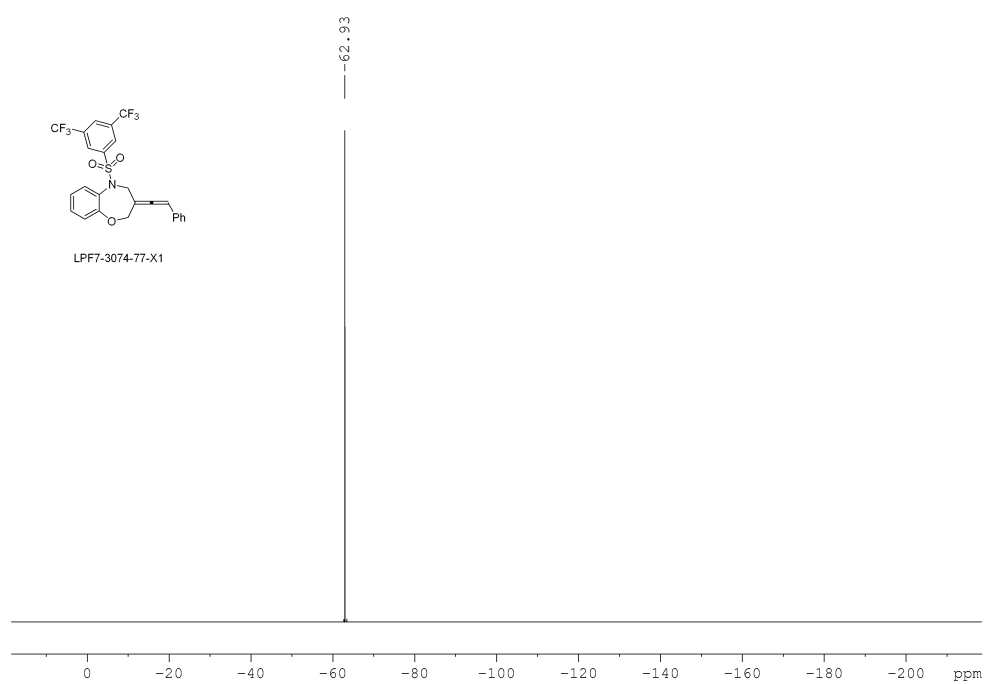

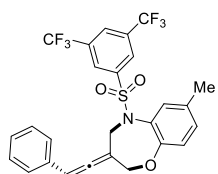

9b

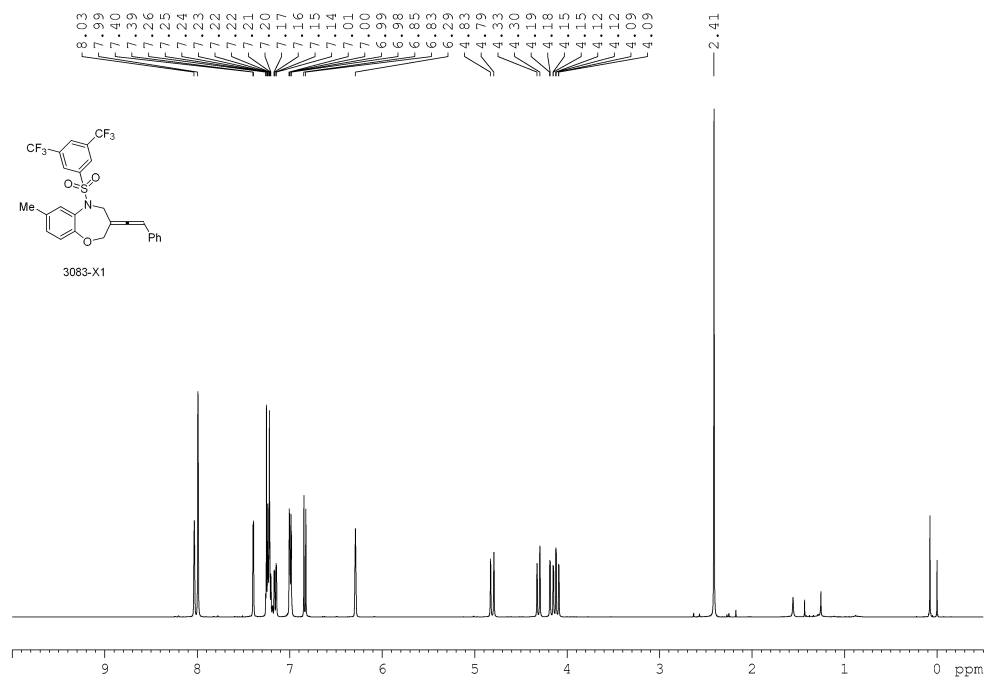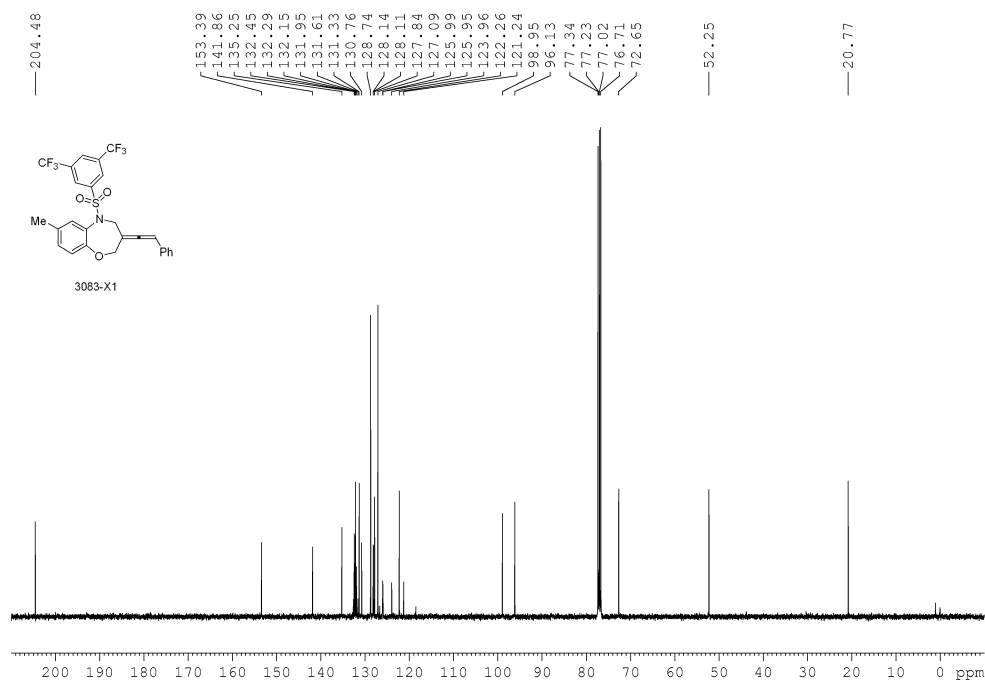

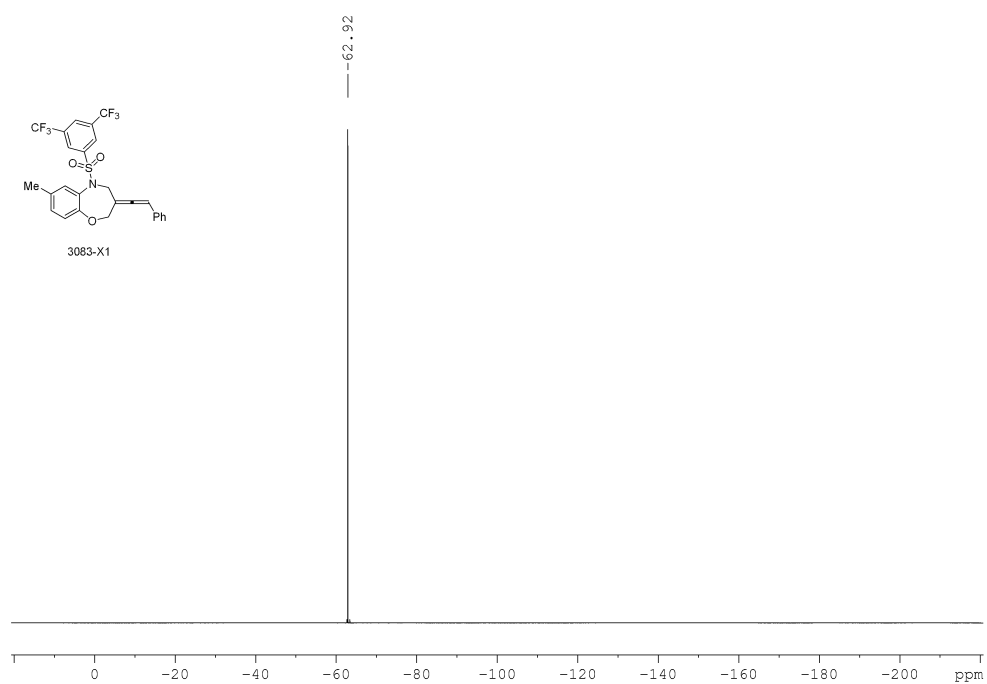

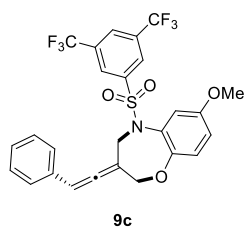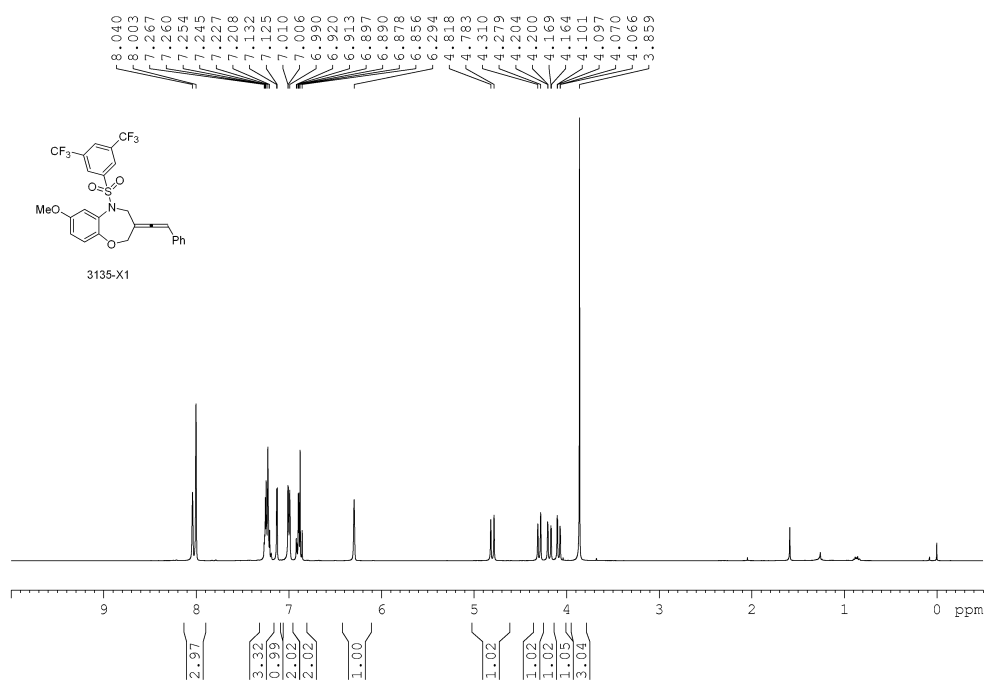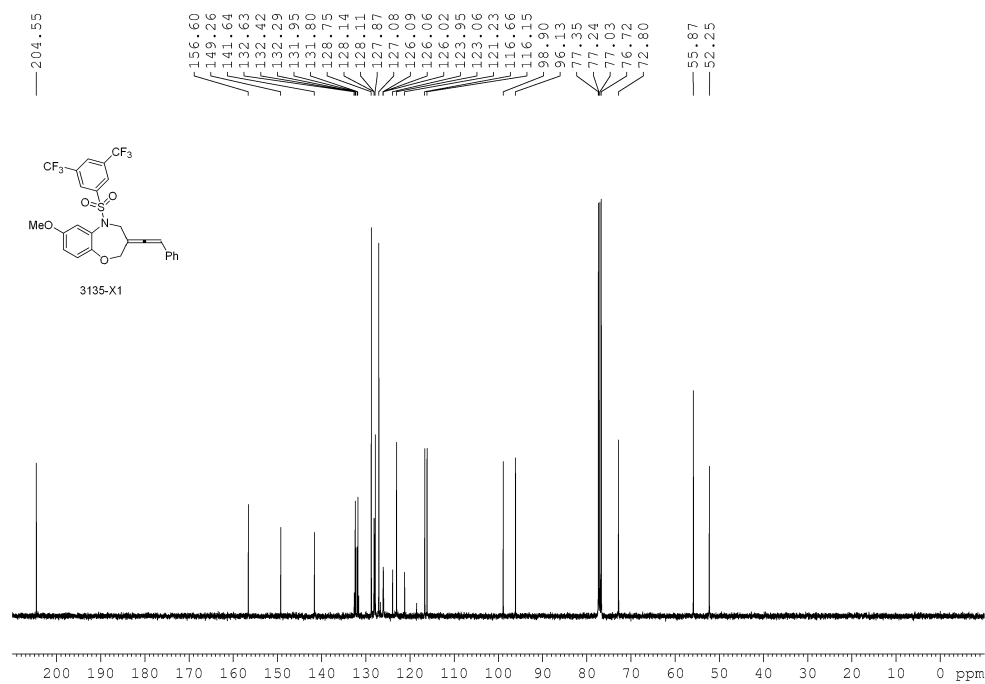

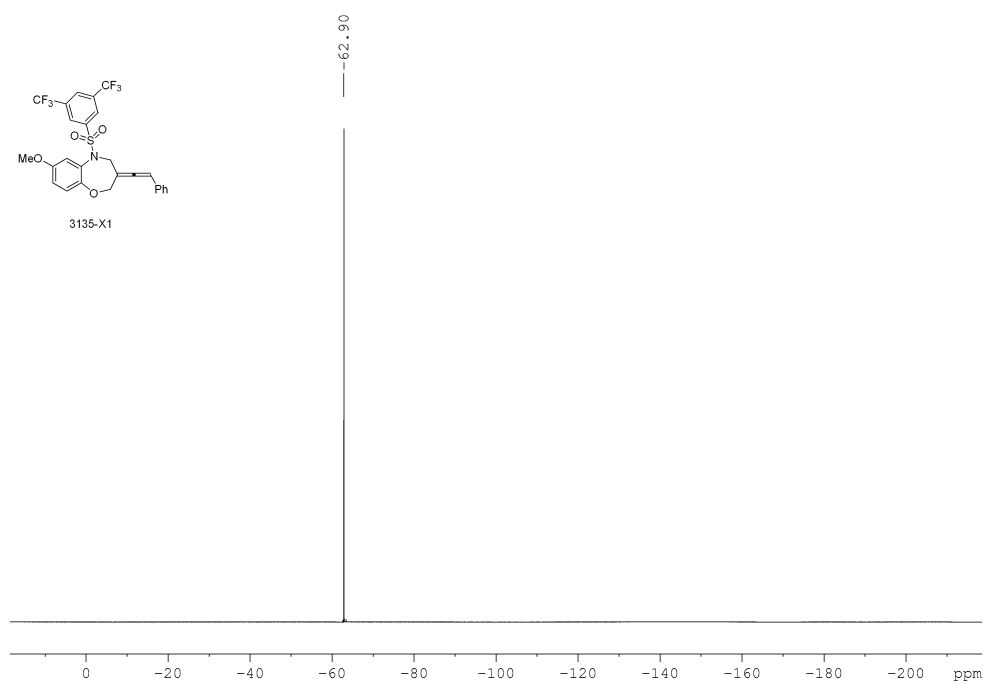

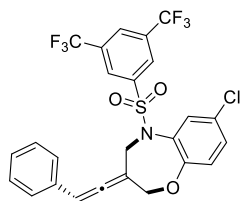

9d

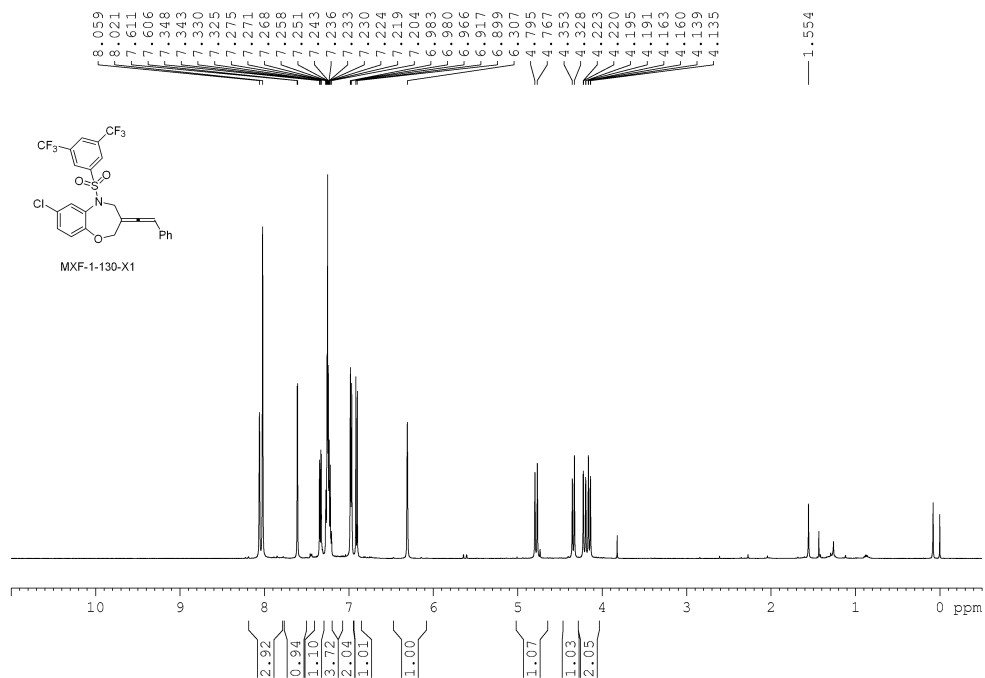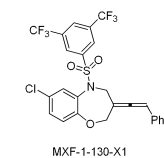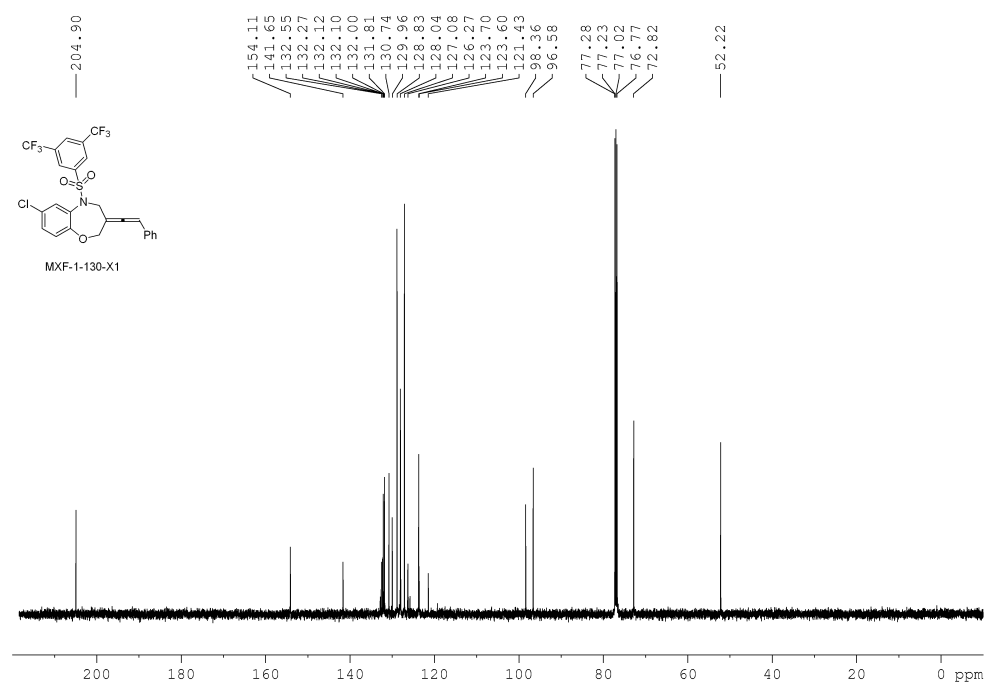

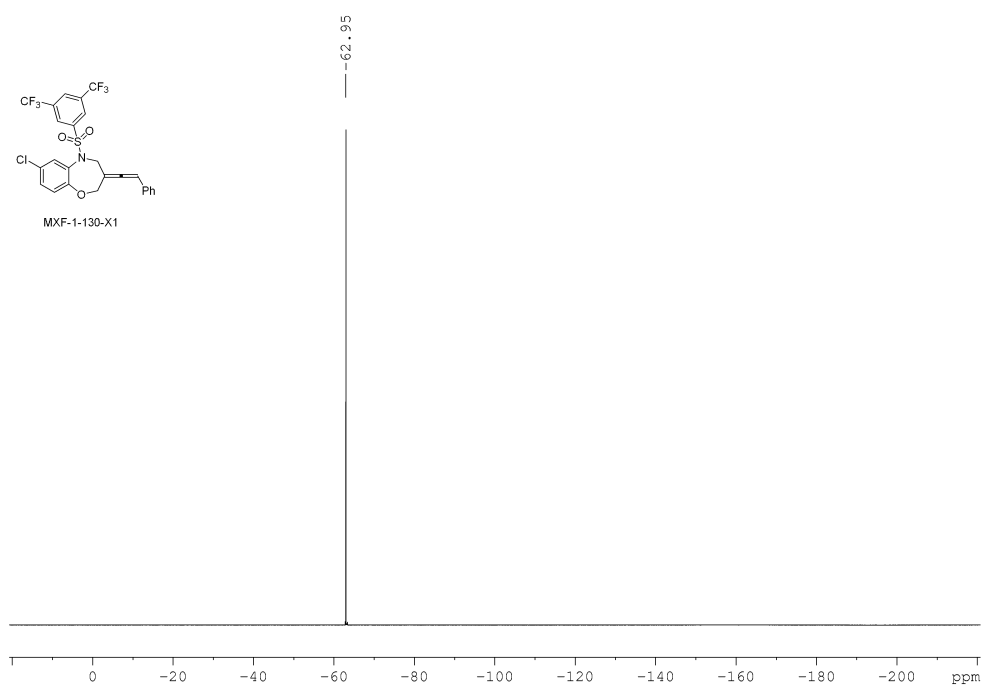

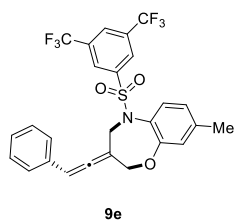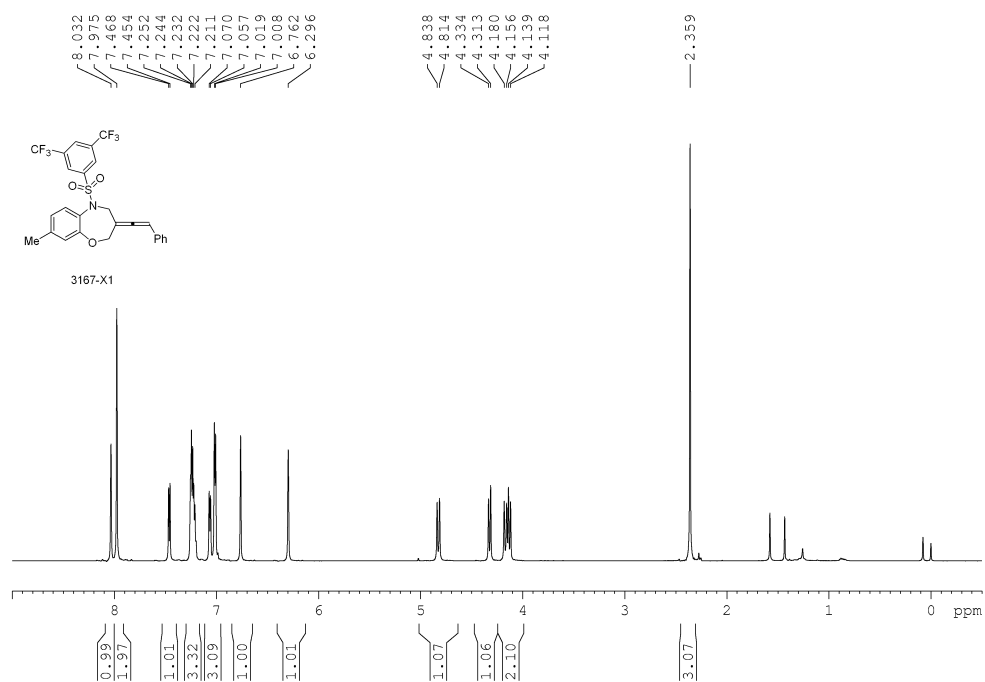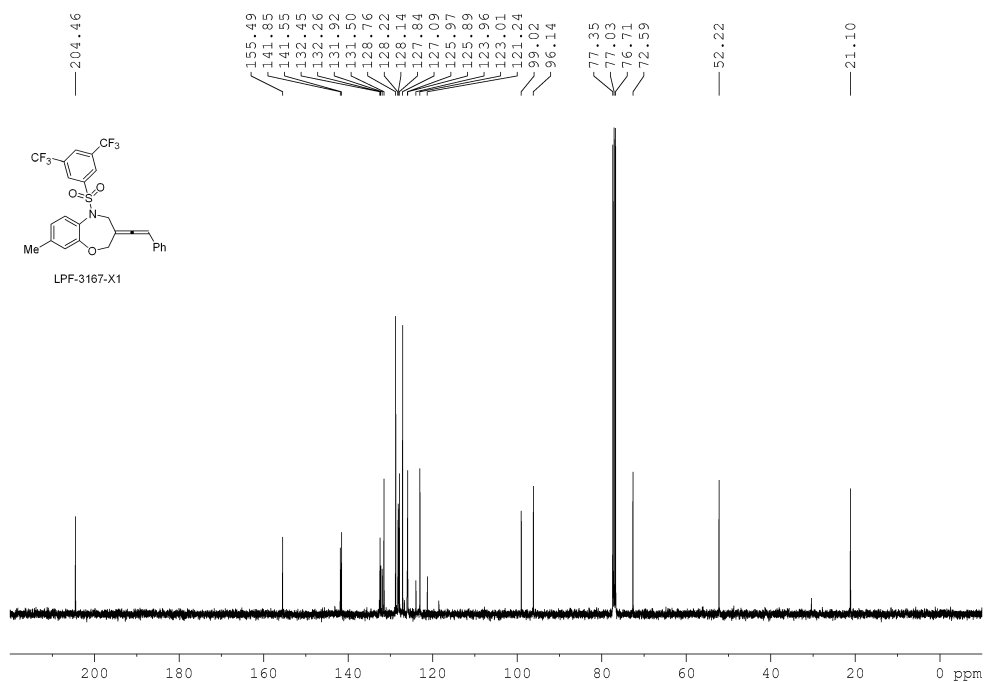

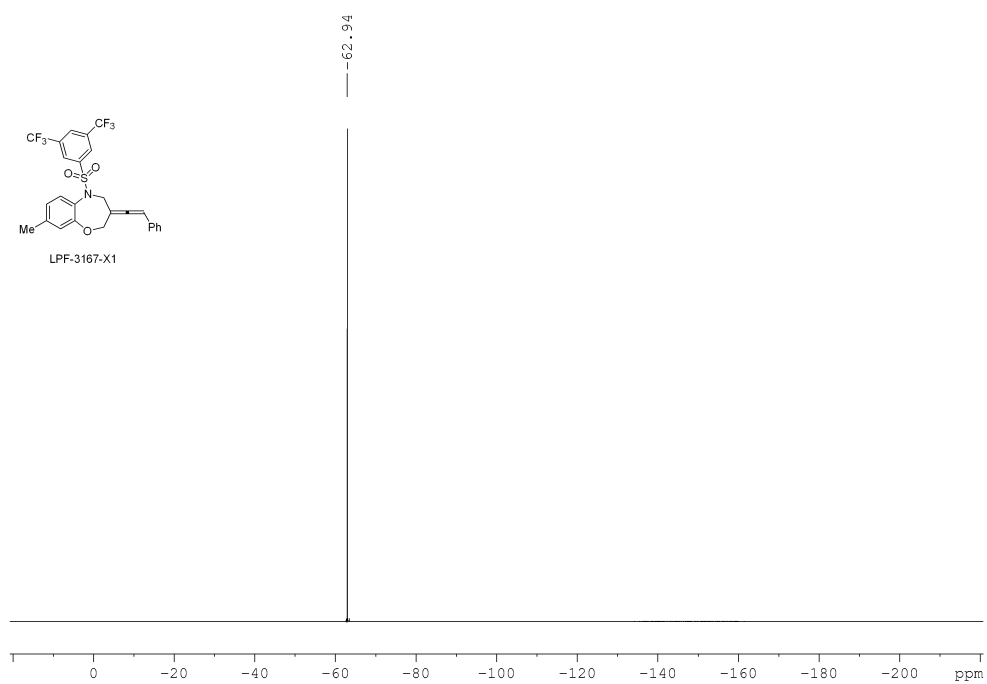

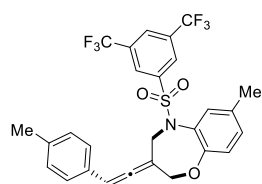

9f

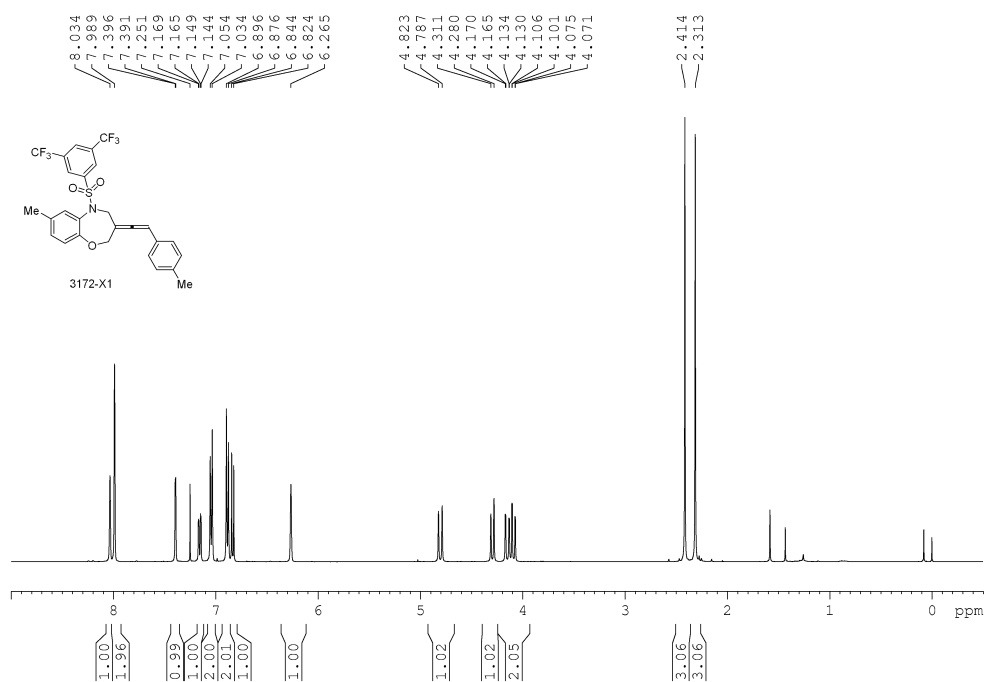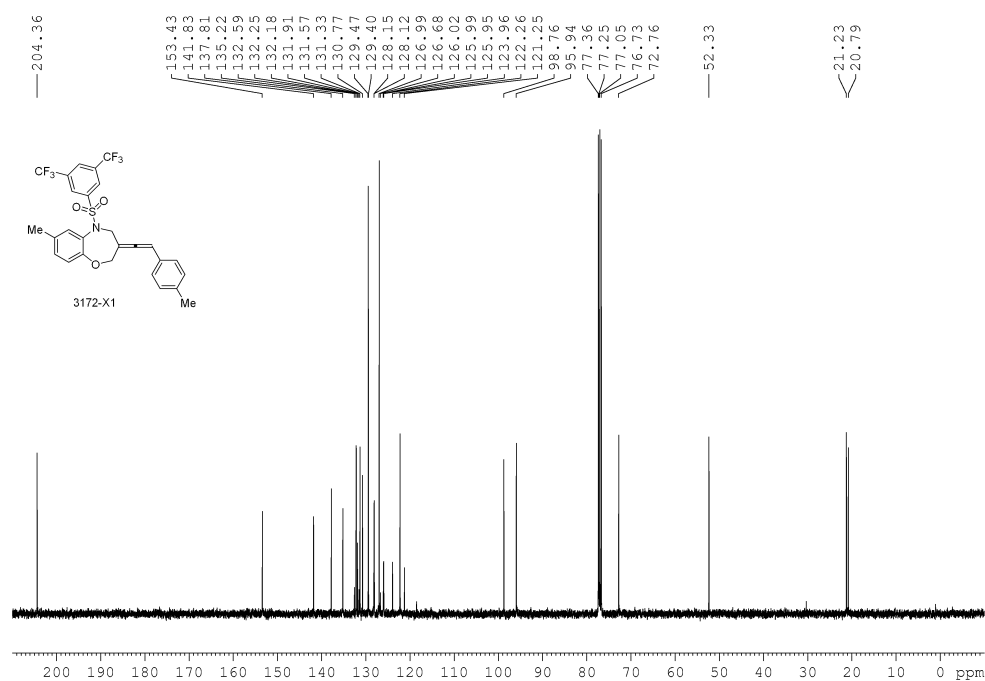

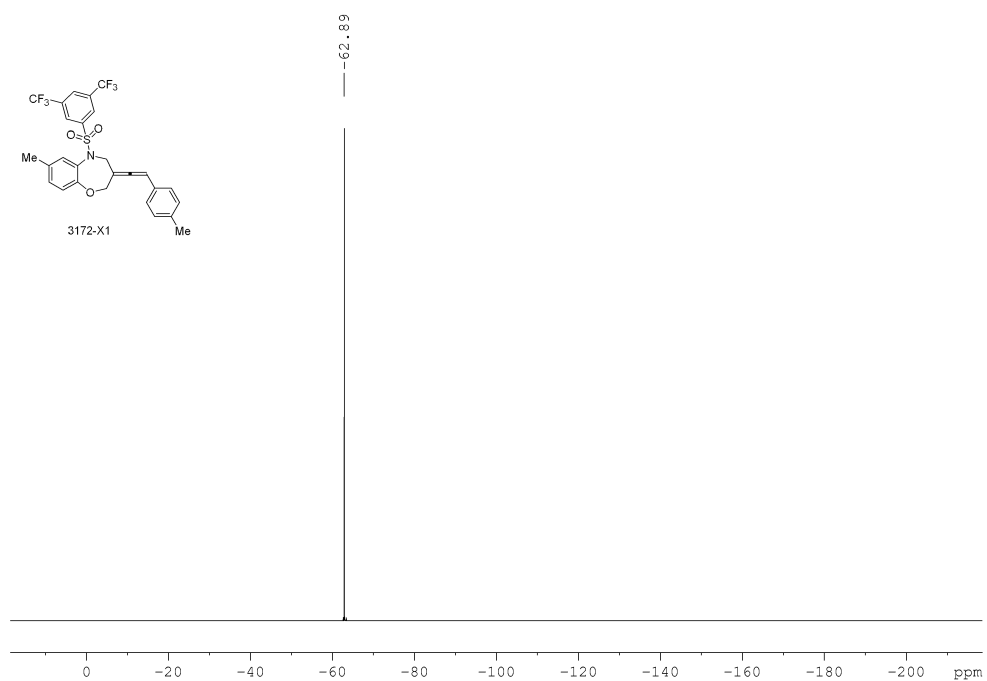

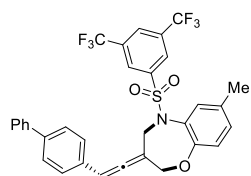

9g

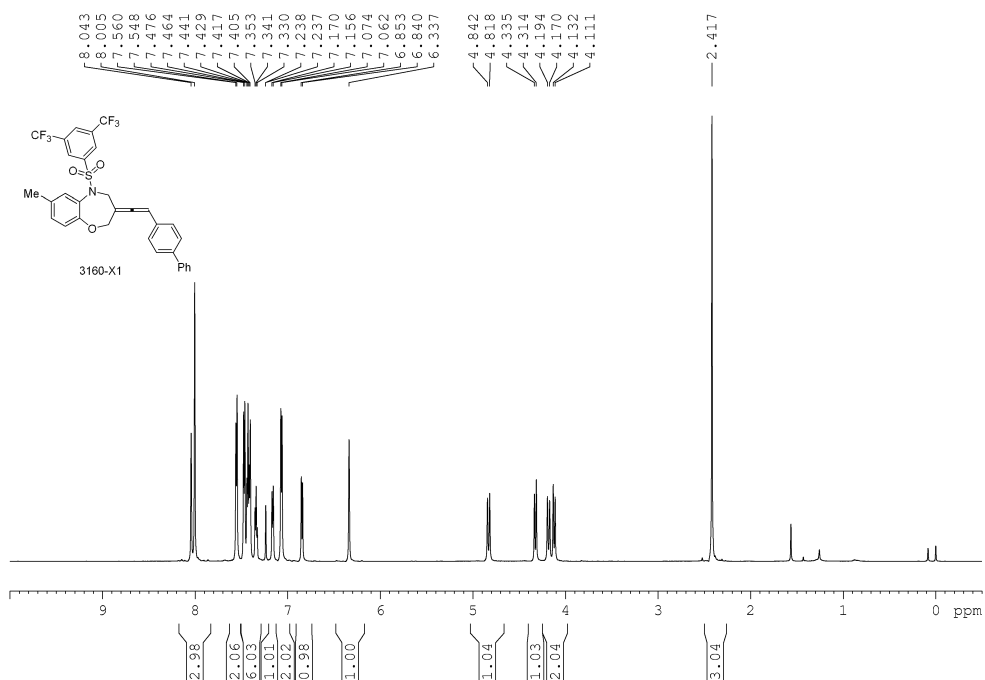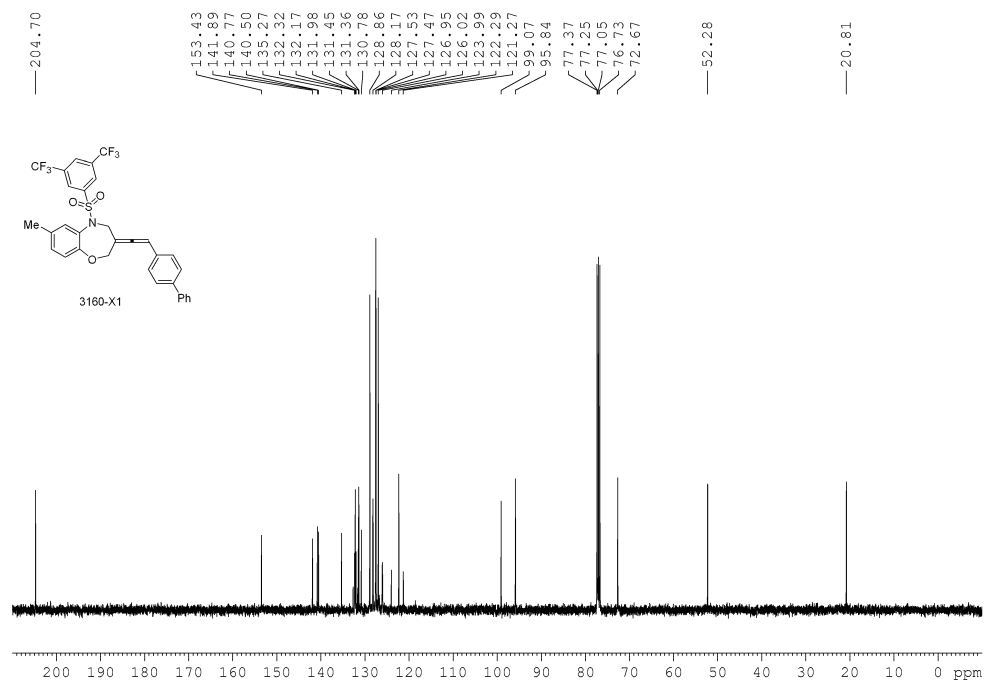

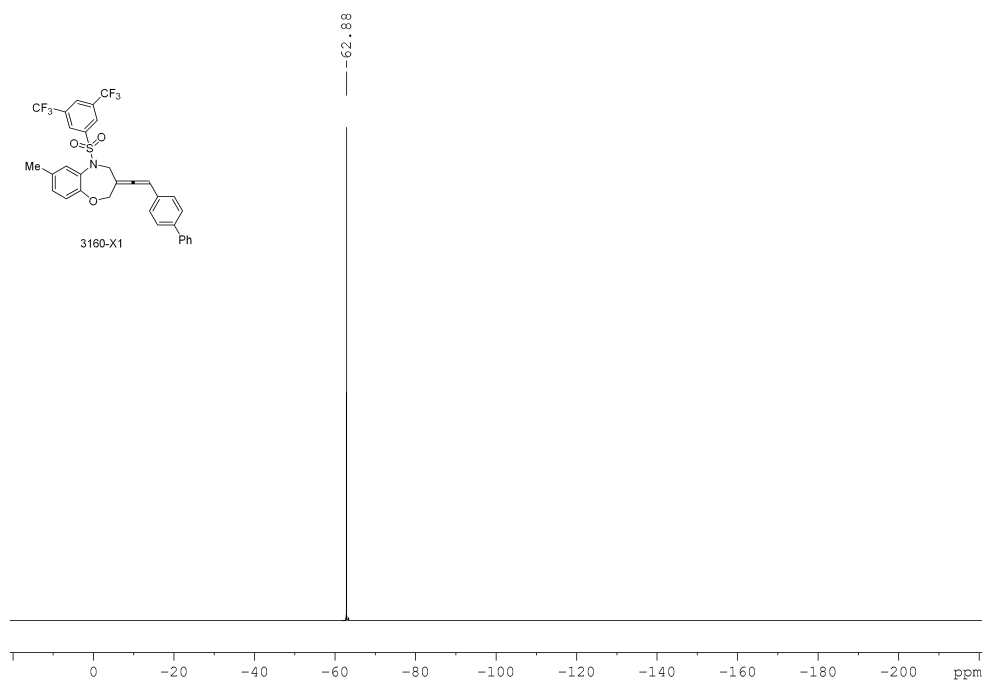

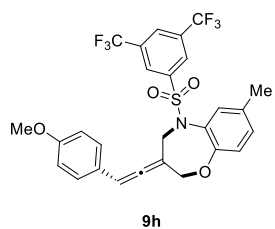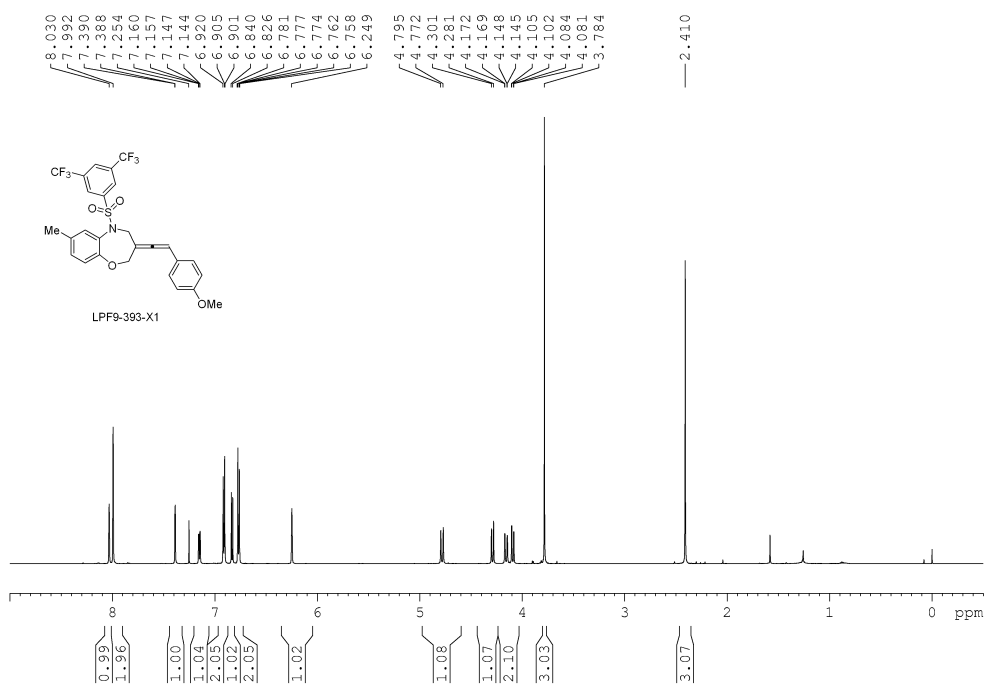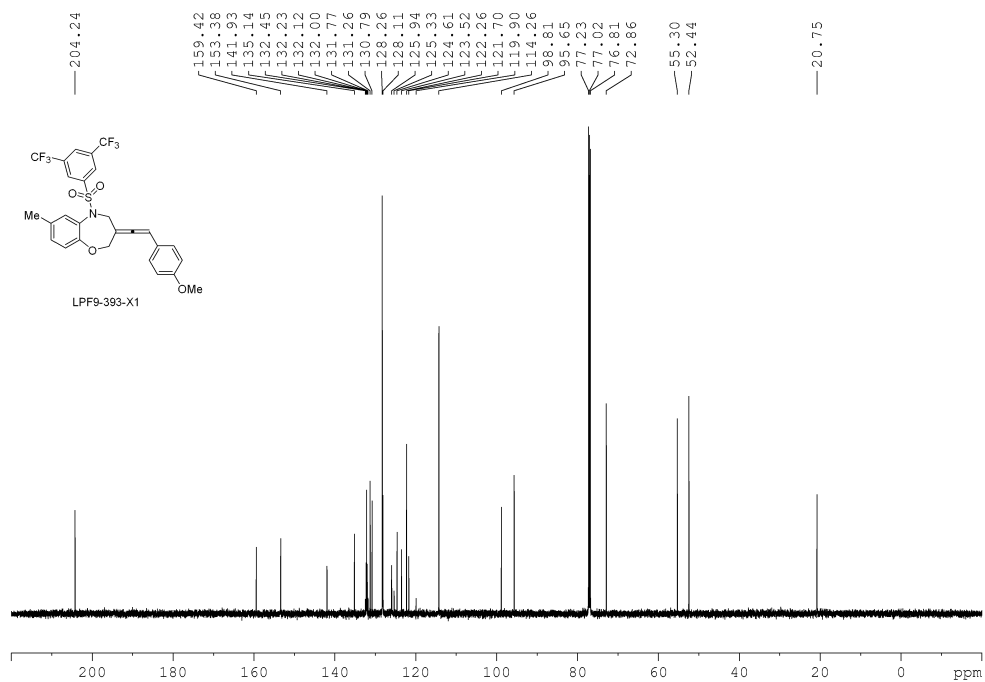

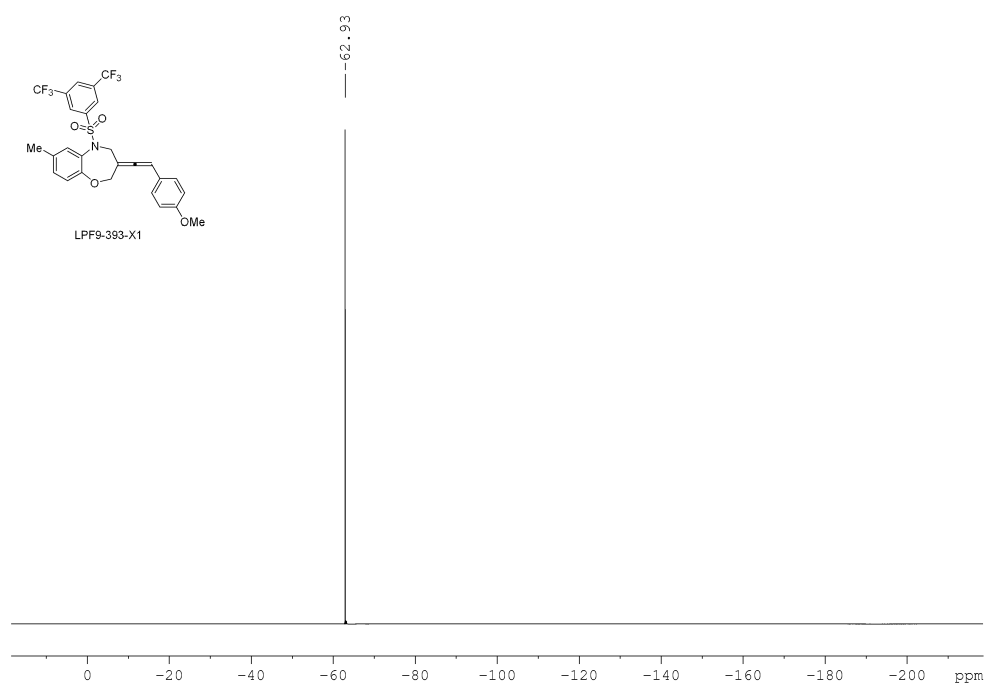

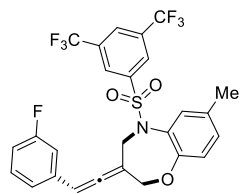

9i

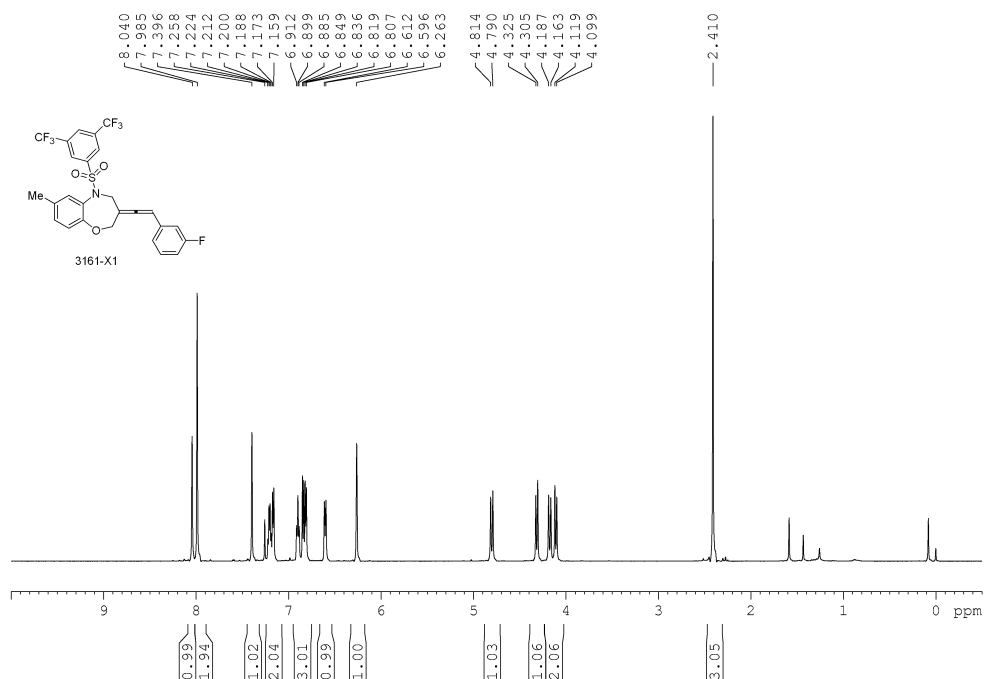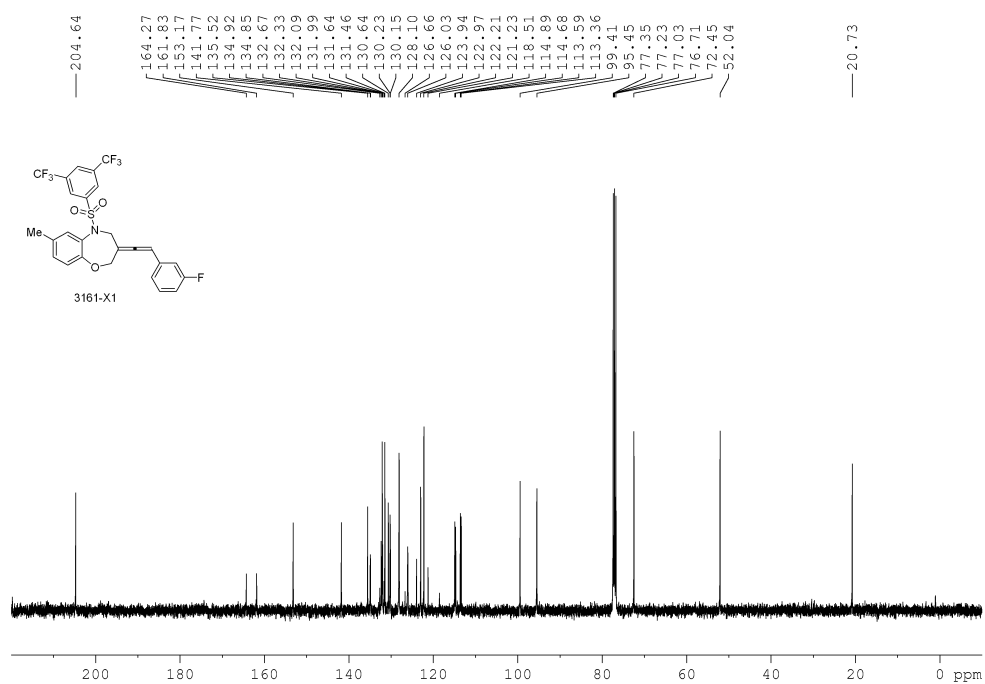

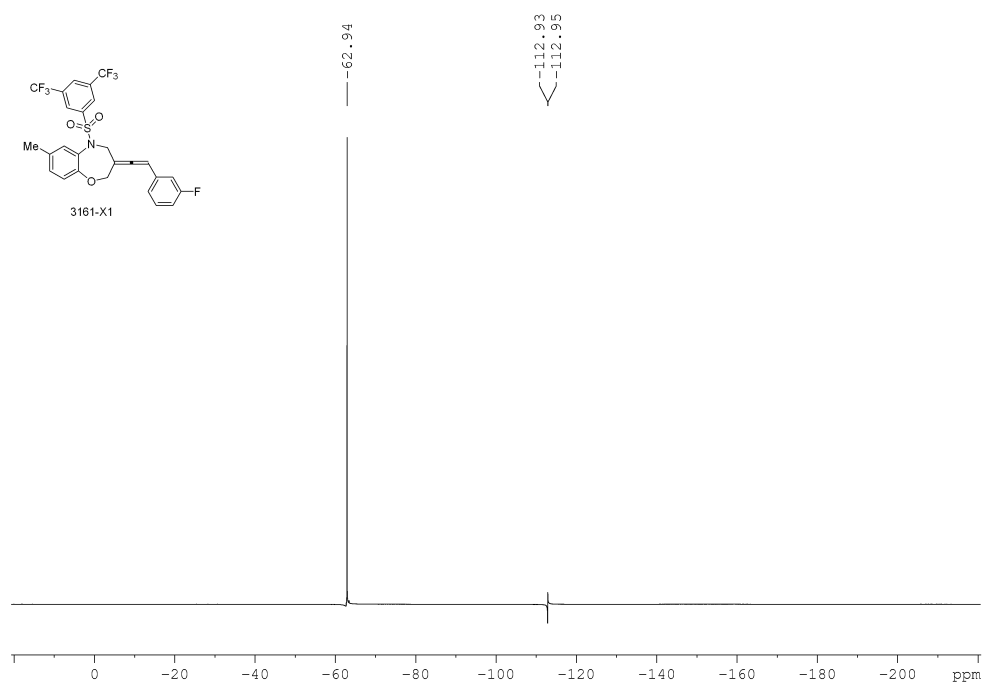

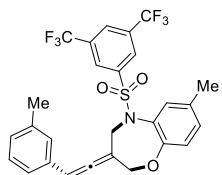

9j

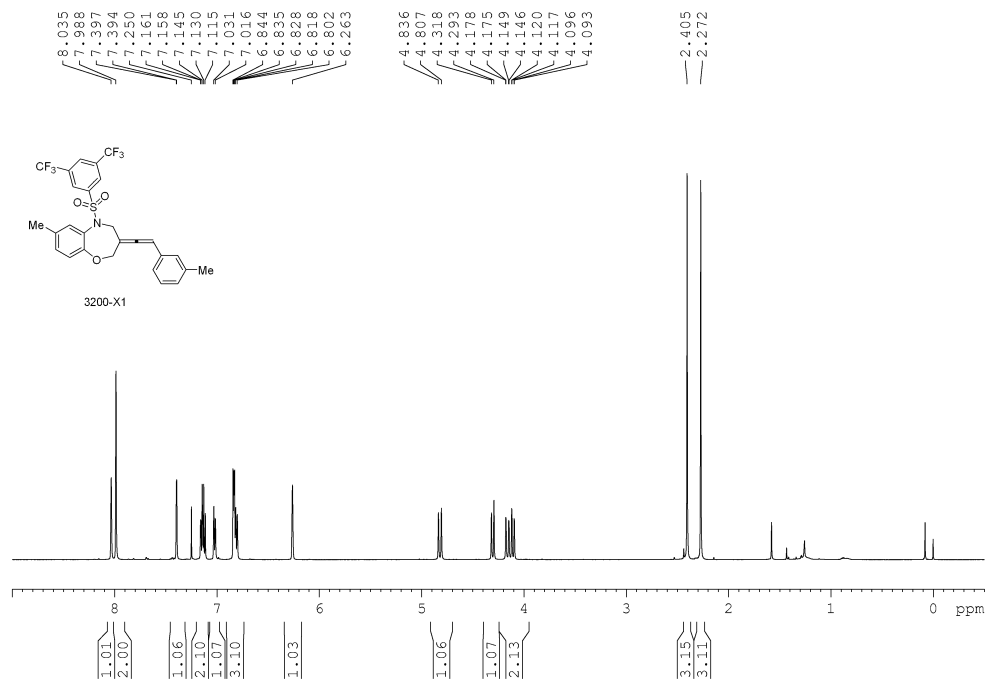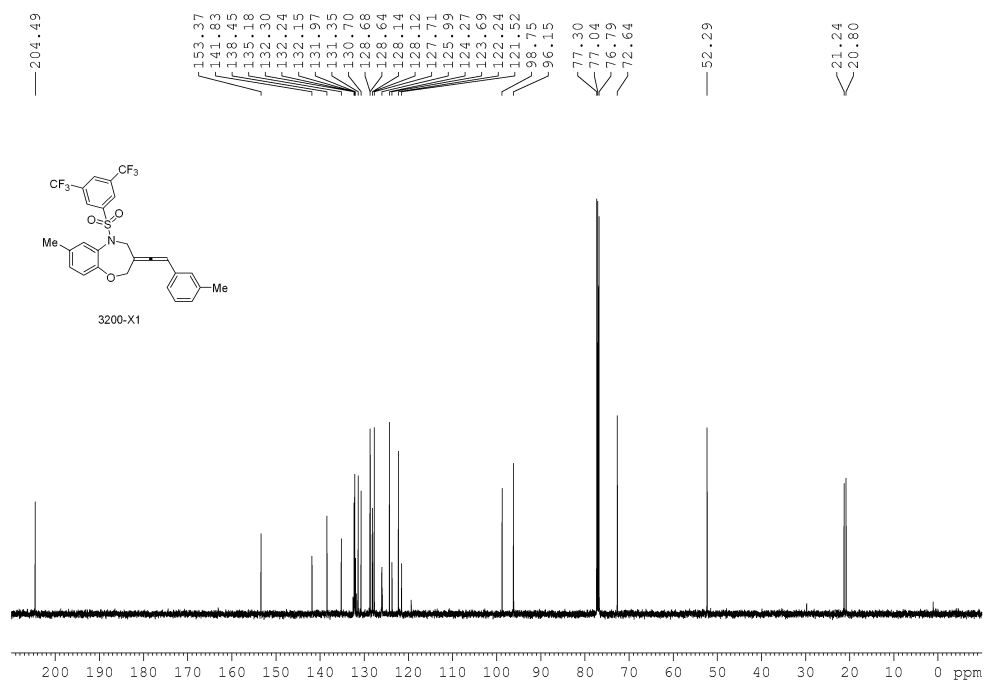

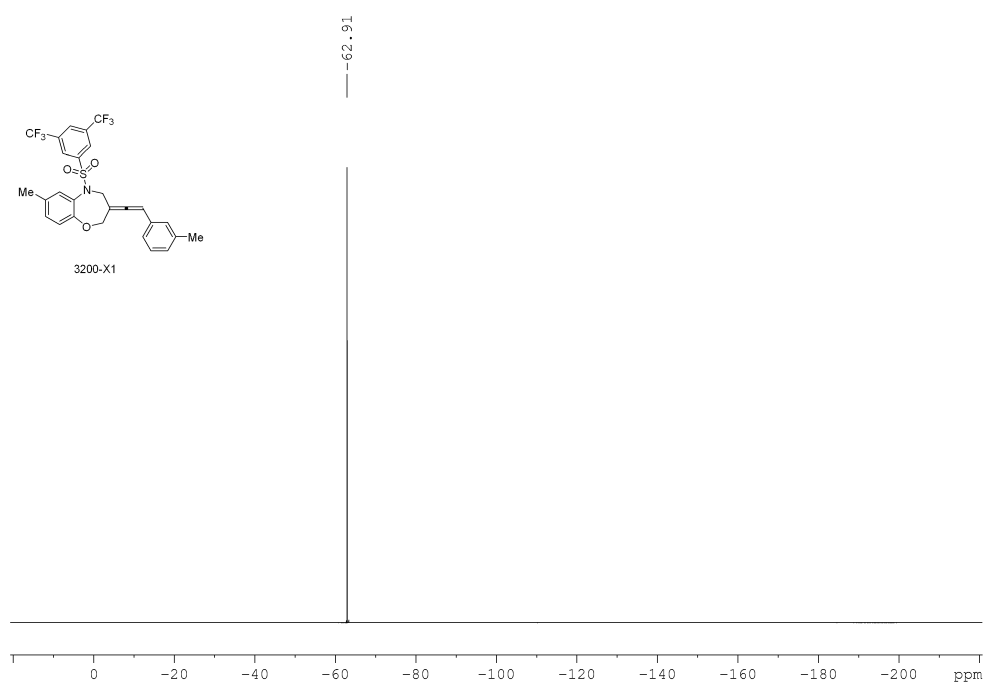

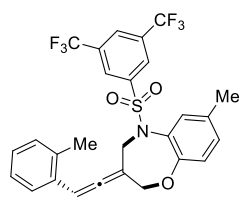

9k

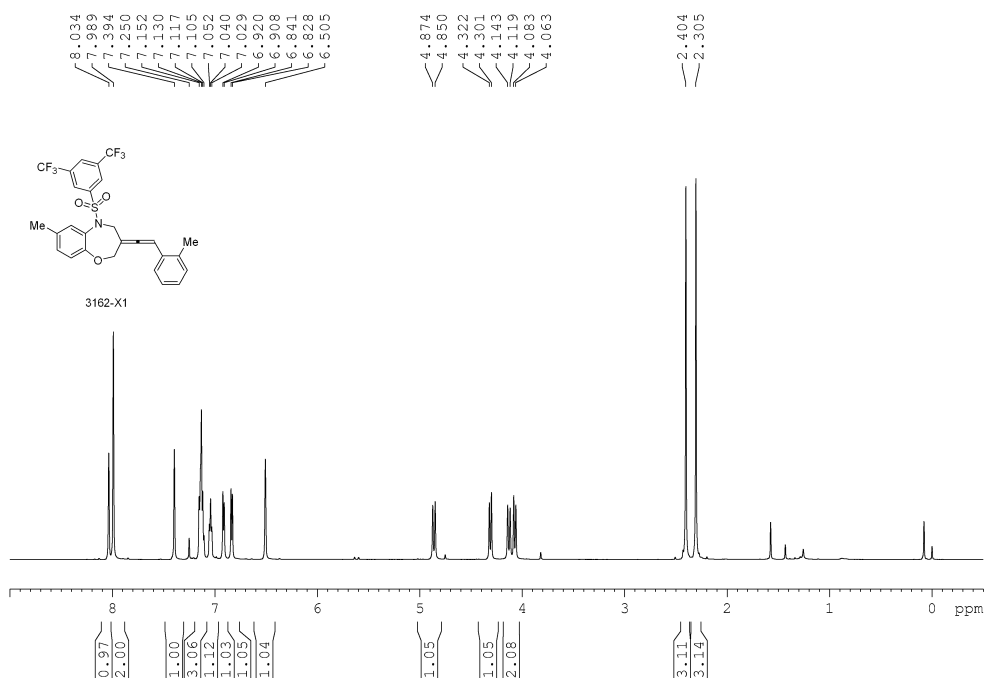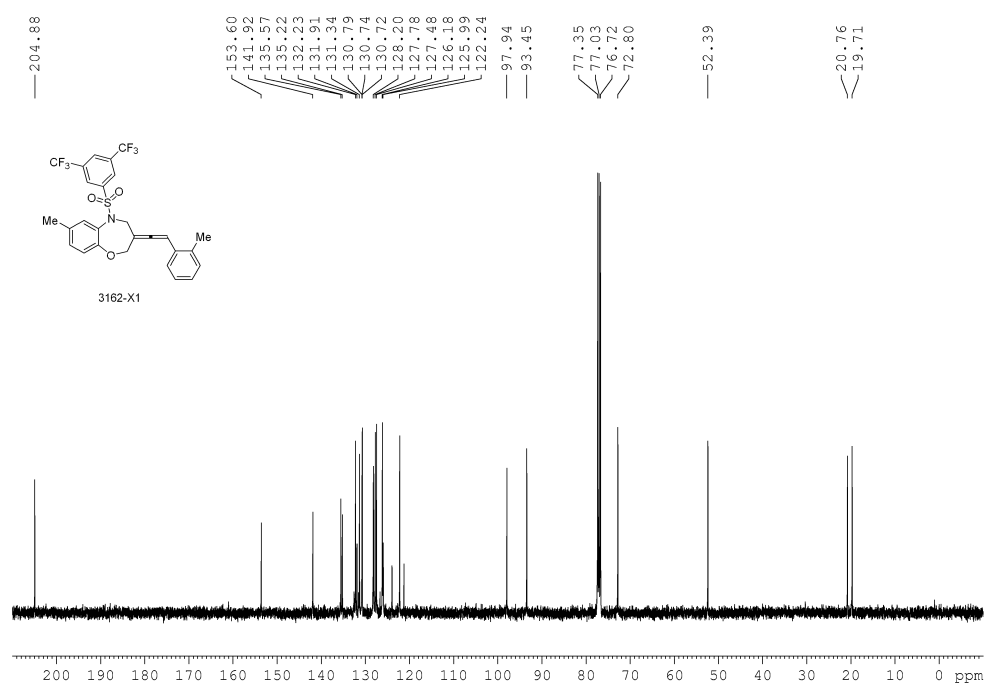

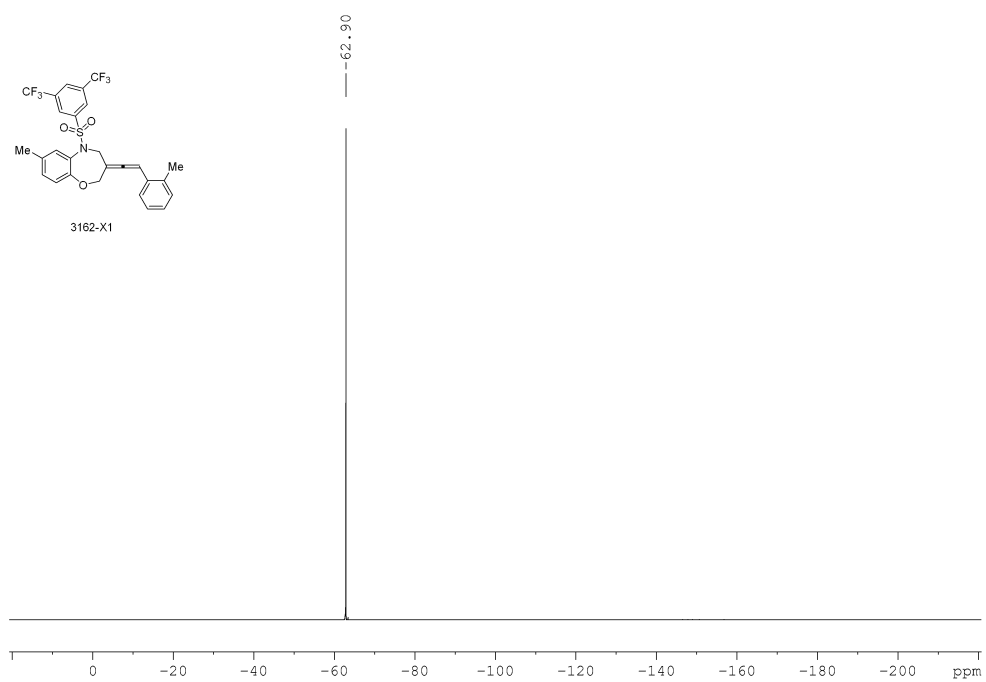

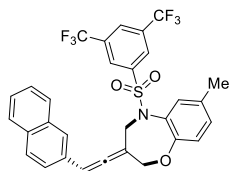

91

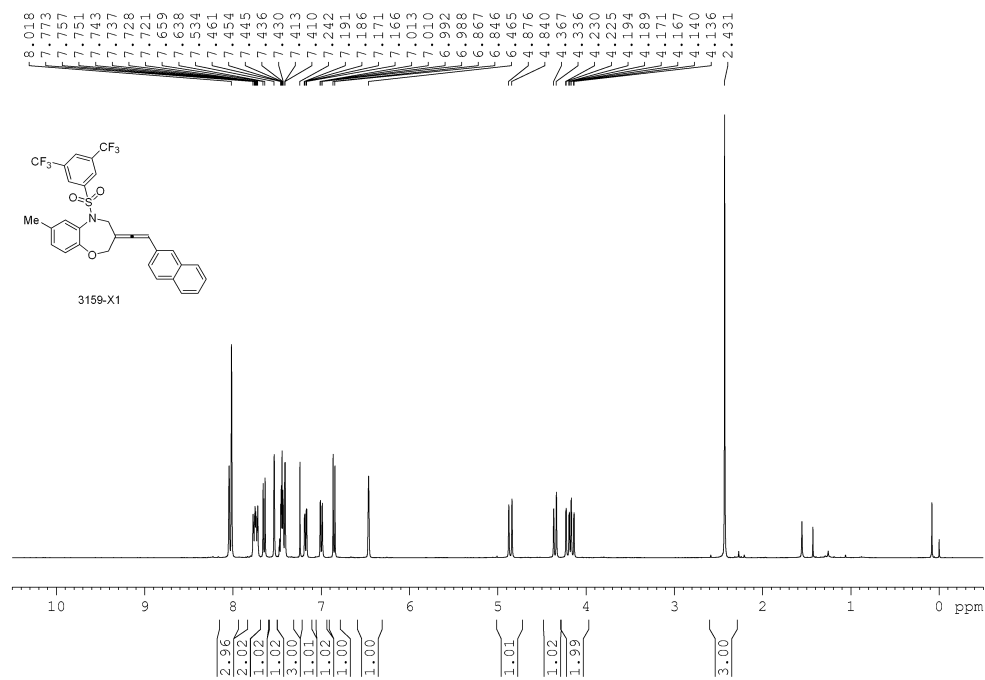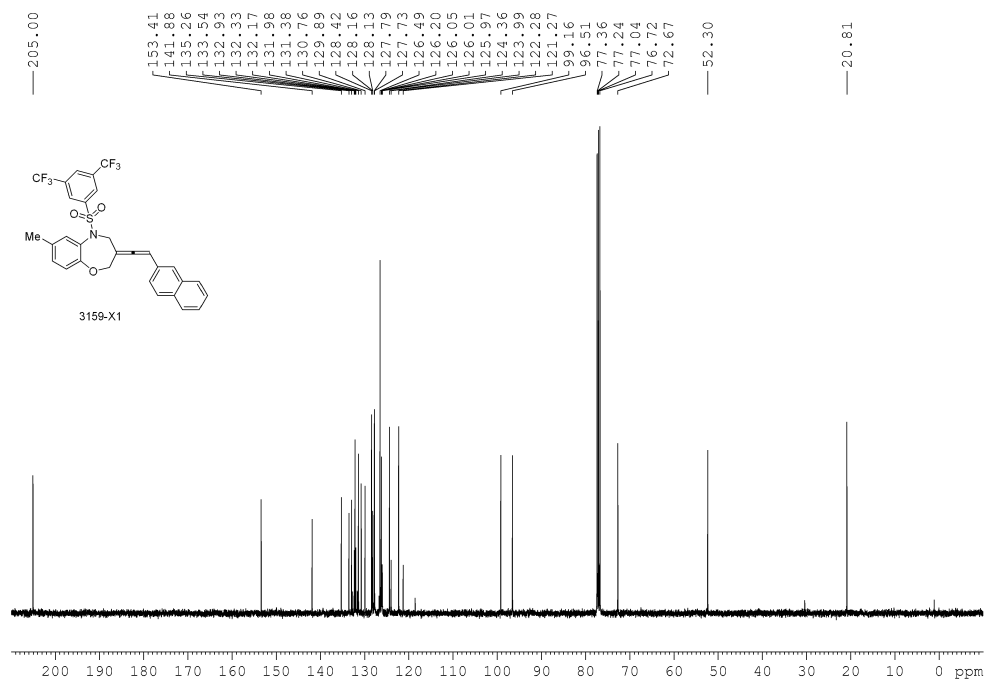

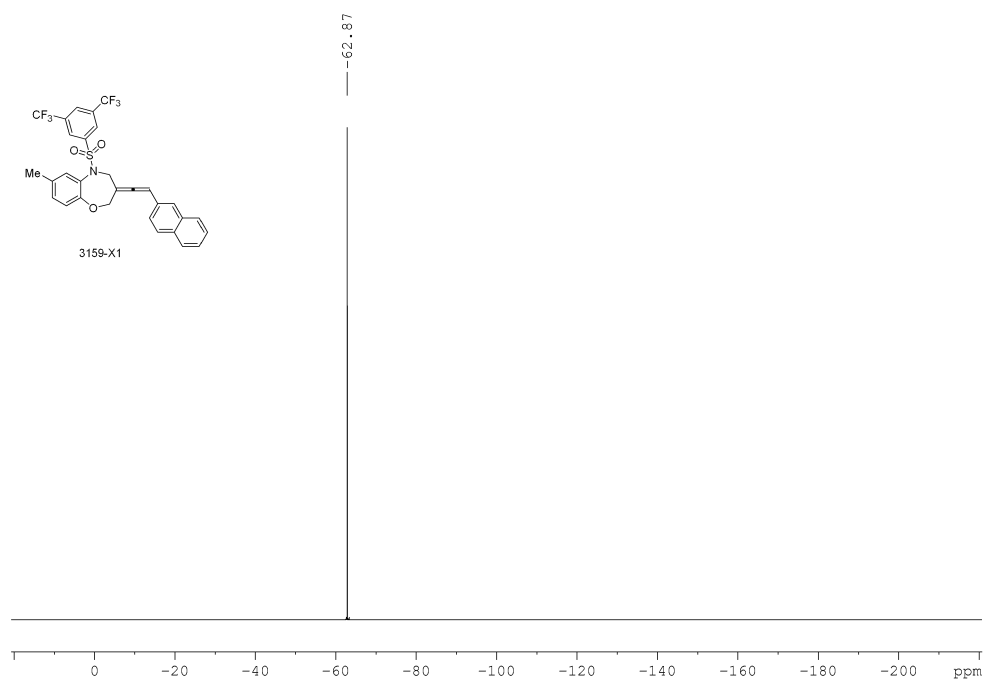

## NMR spectra of 10

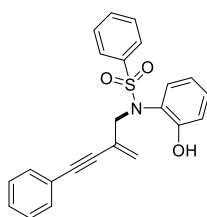

10a

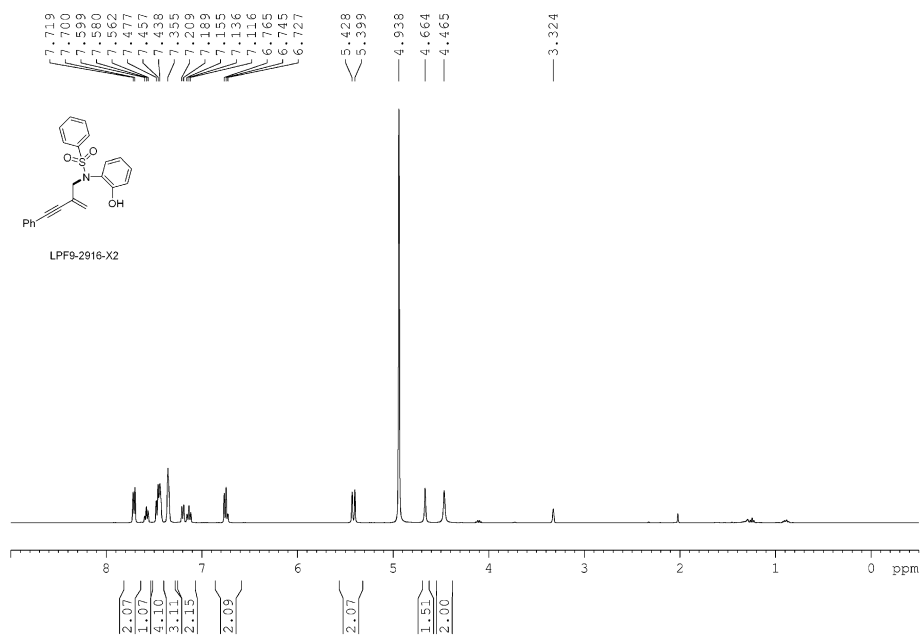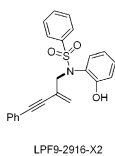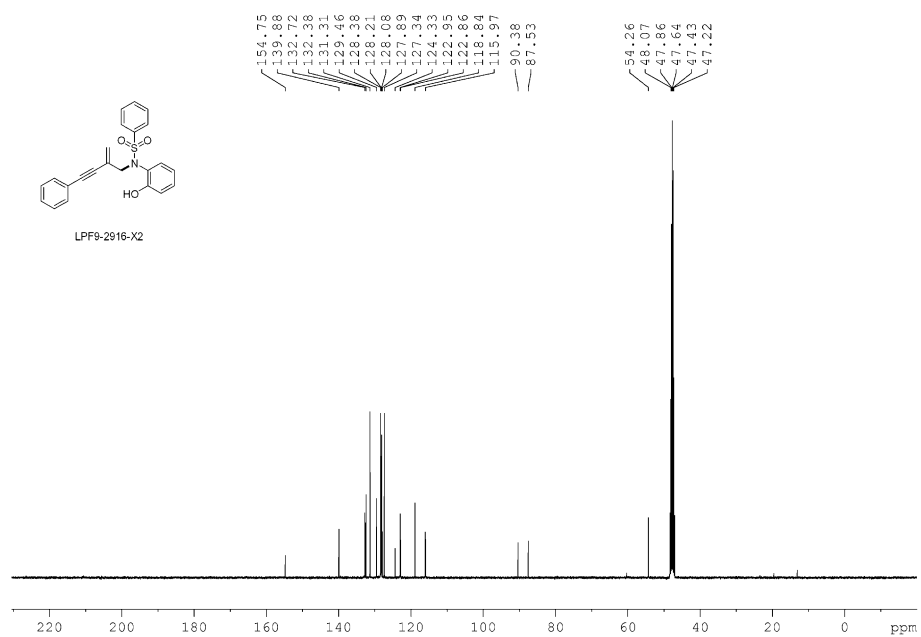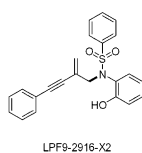

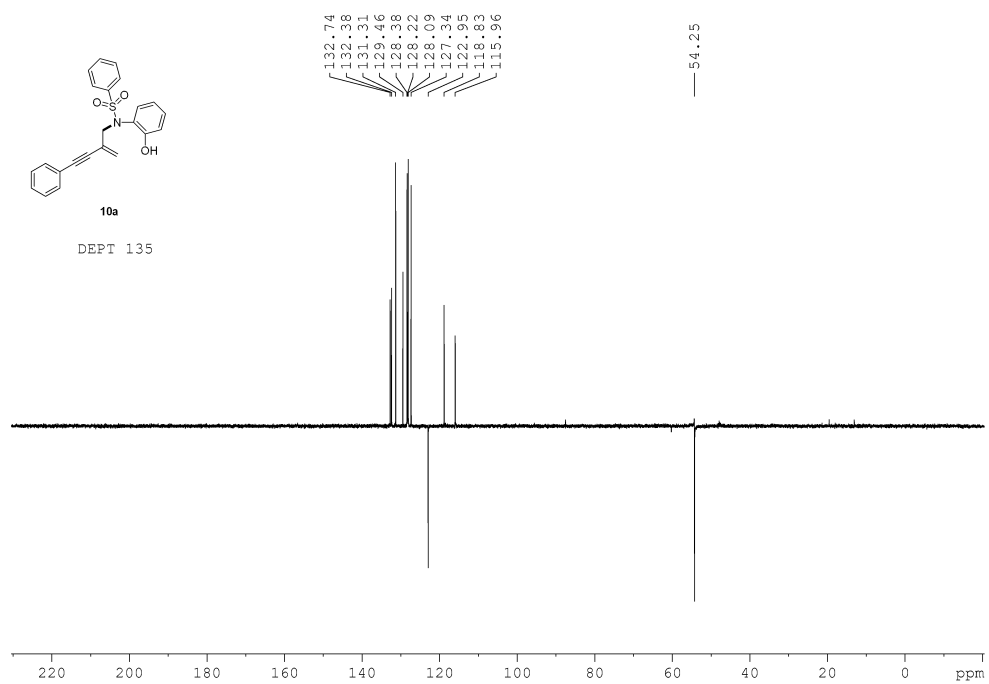

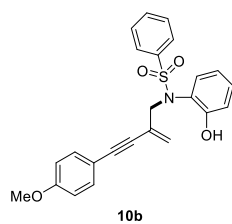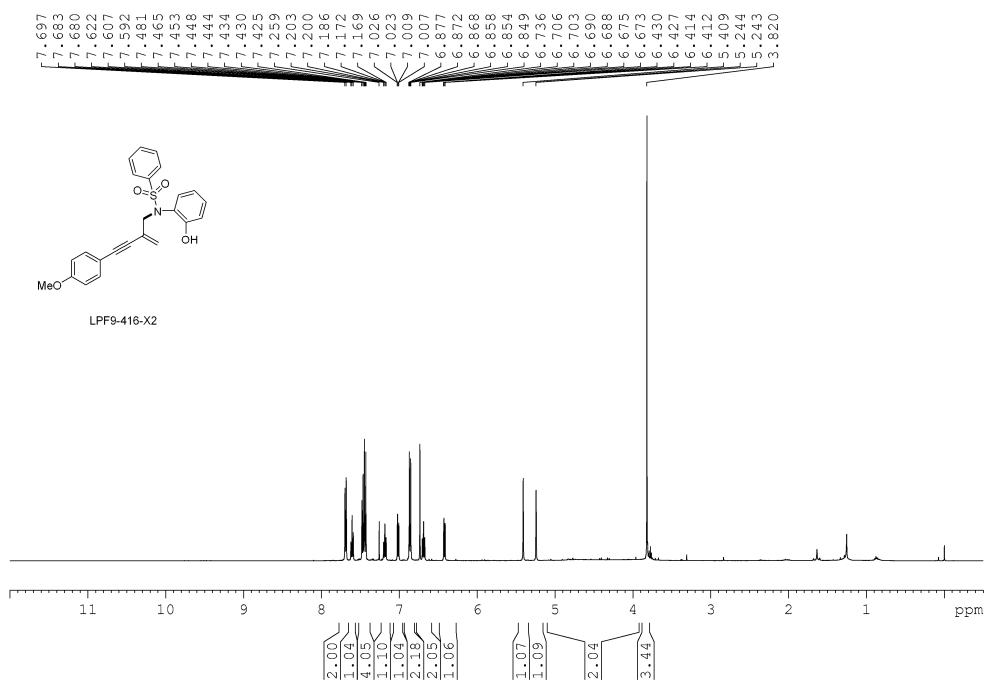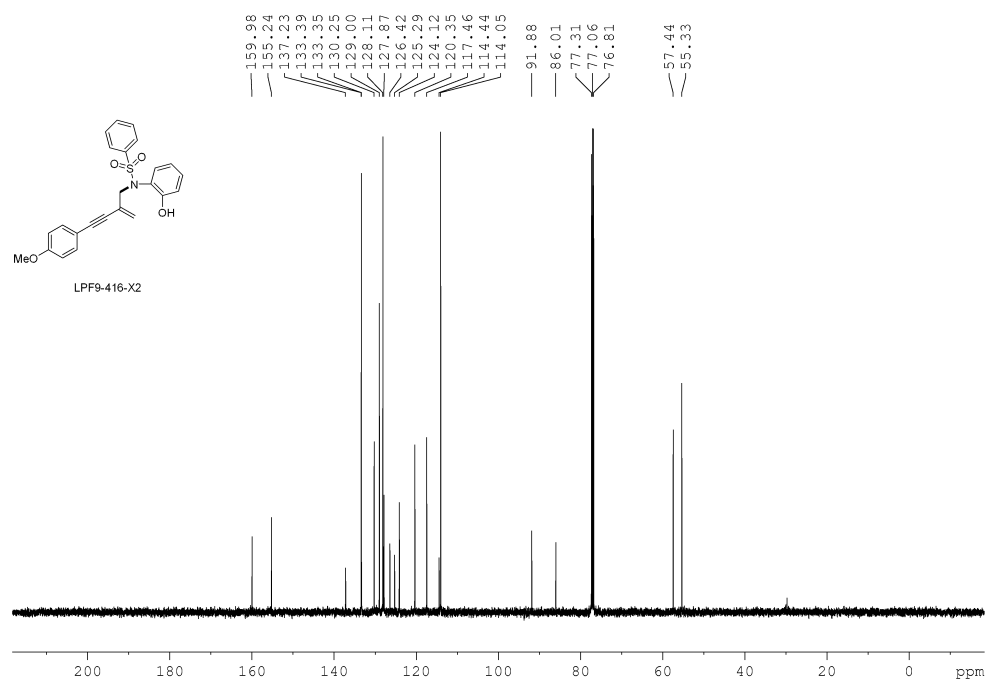

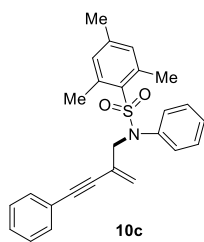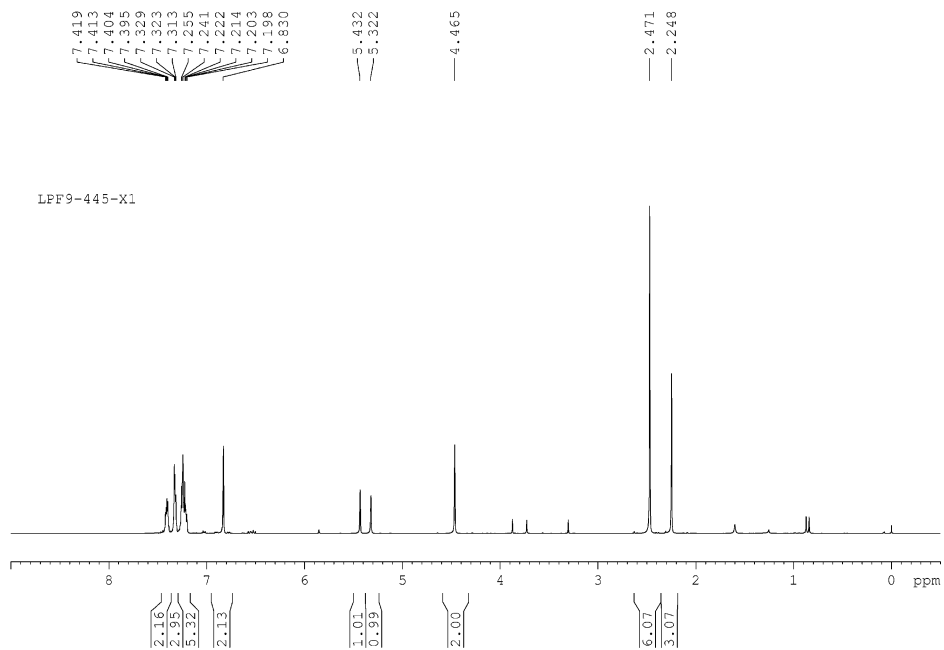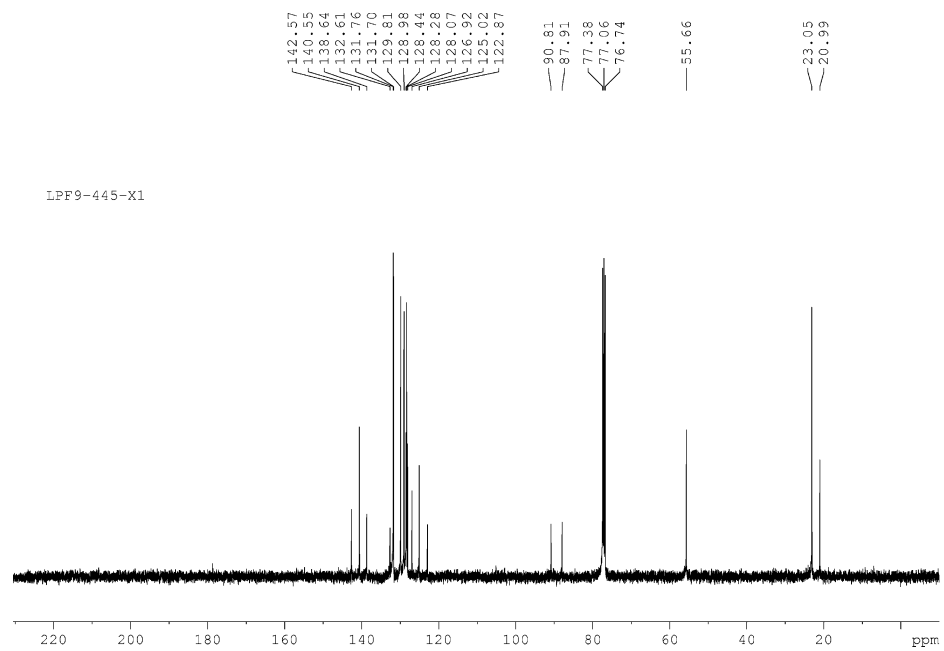

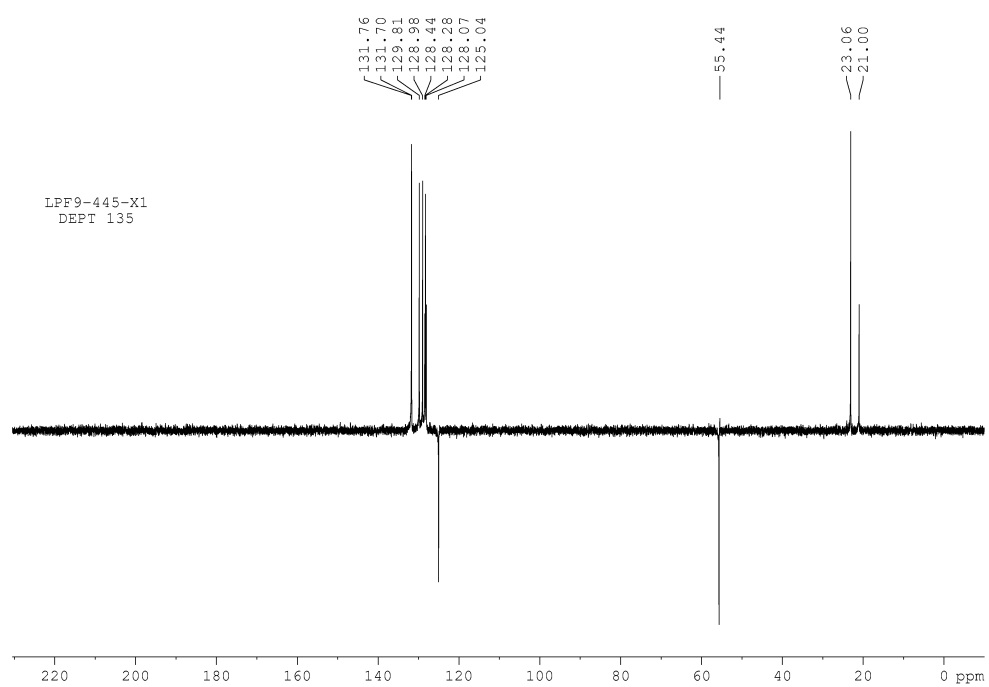

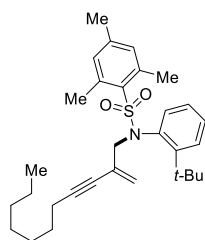

**10d, 83%**

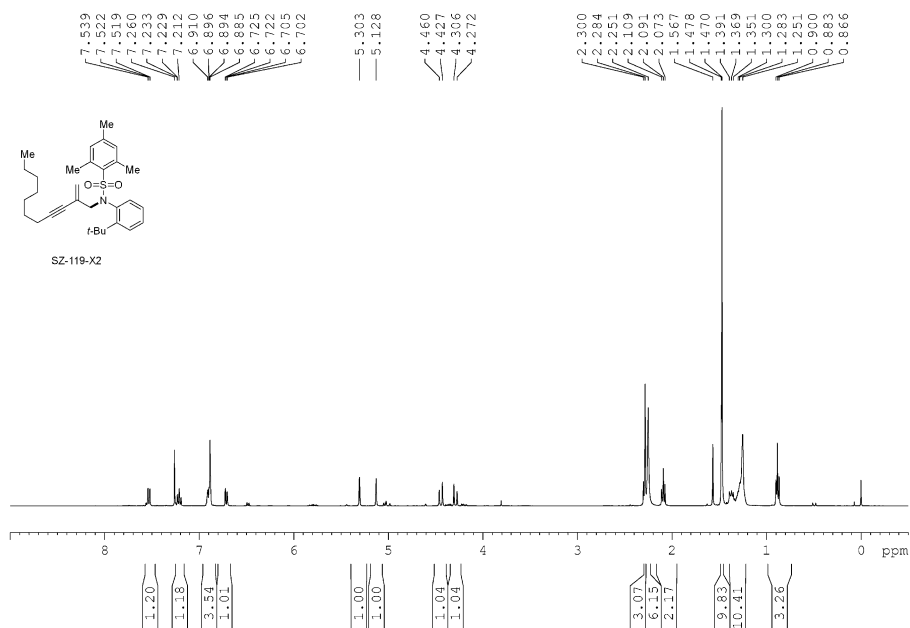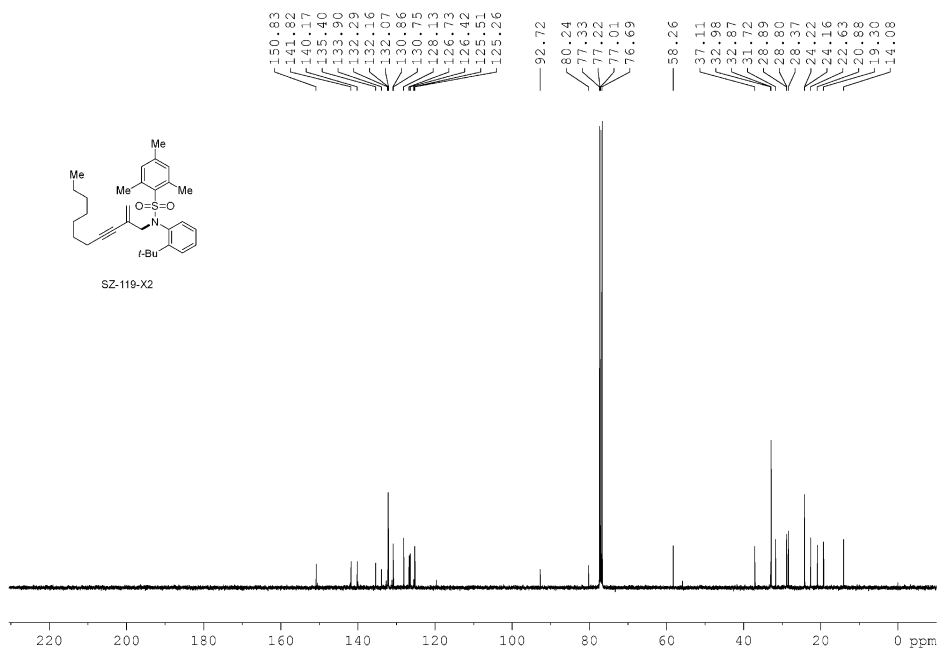

# NMR spectra of 13

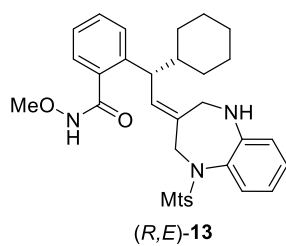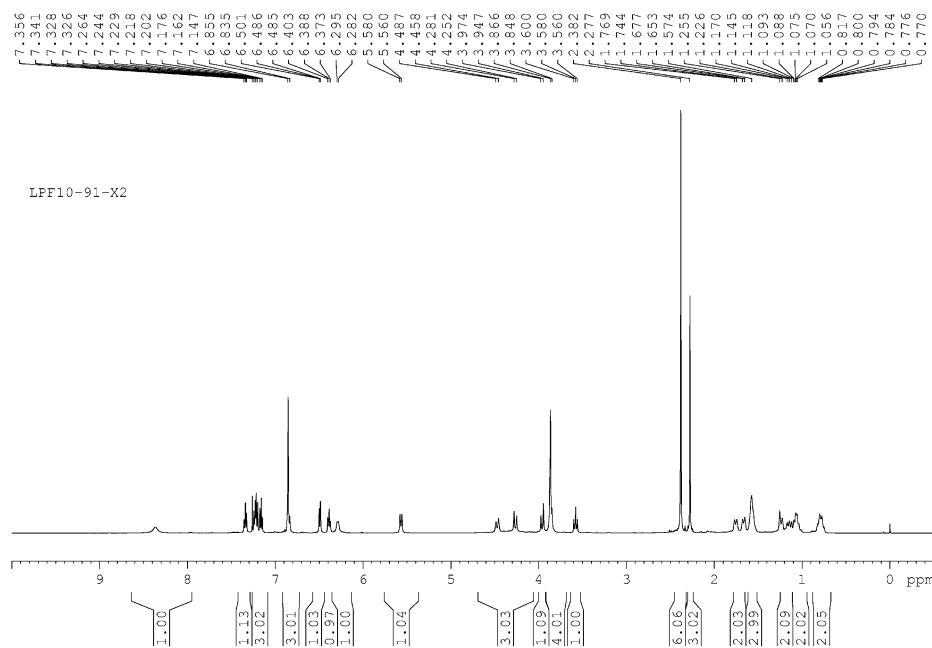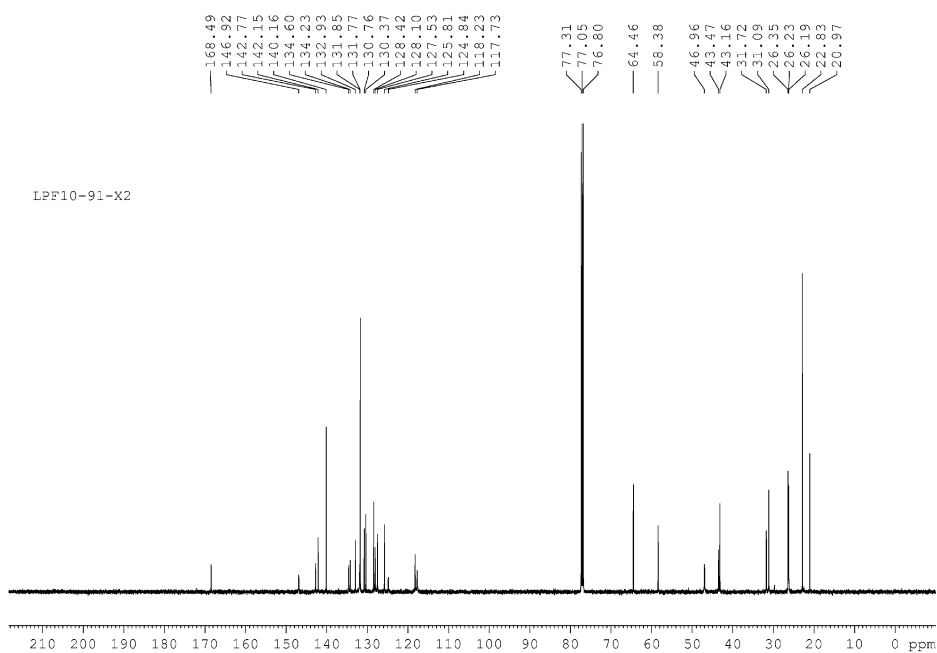

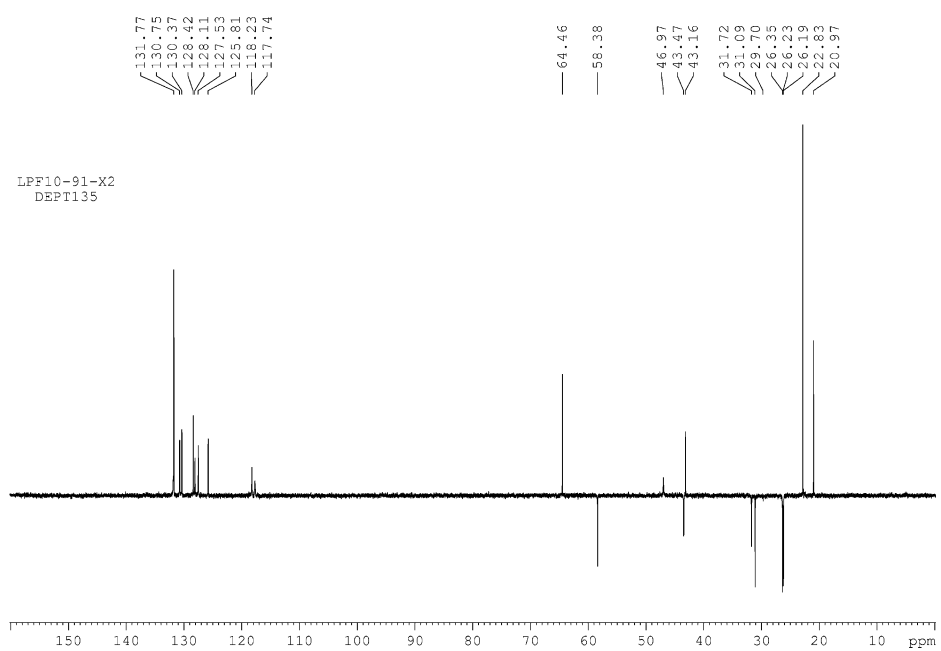

# NMR spectra of 15

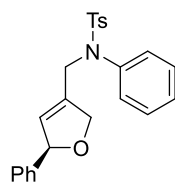

(R)-15

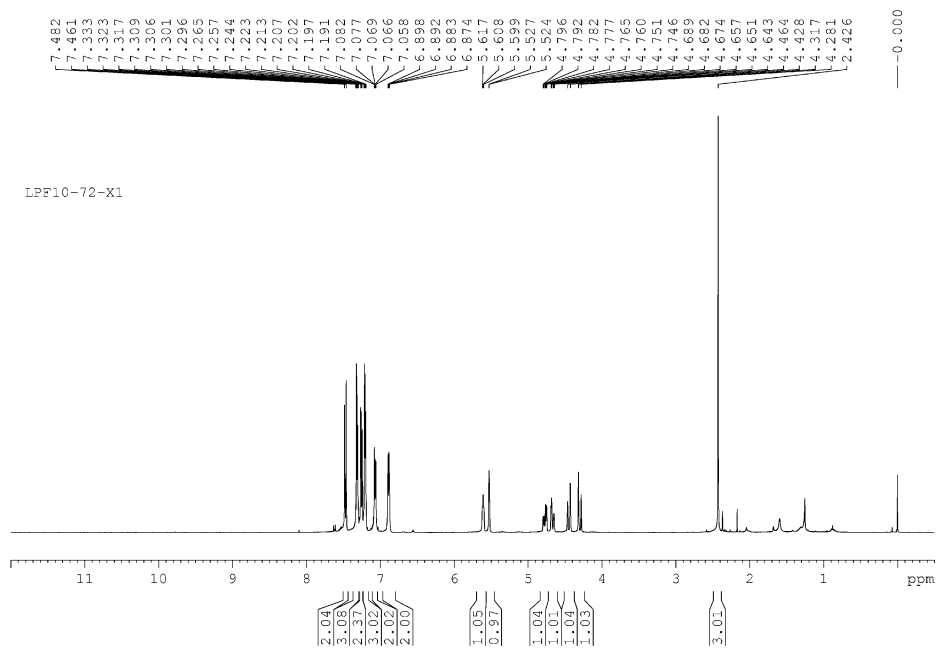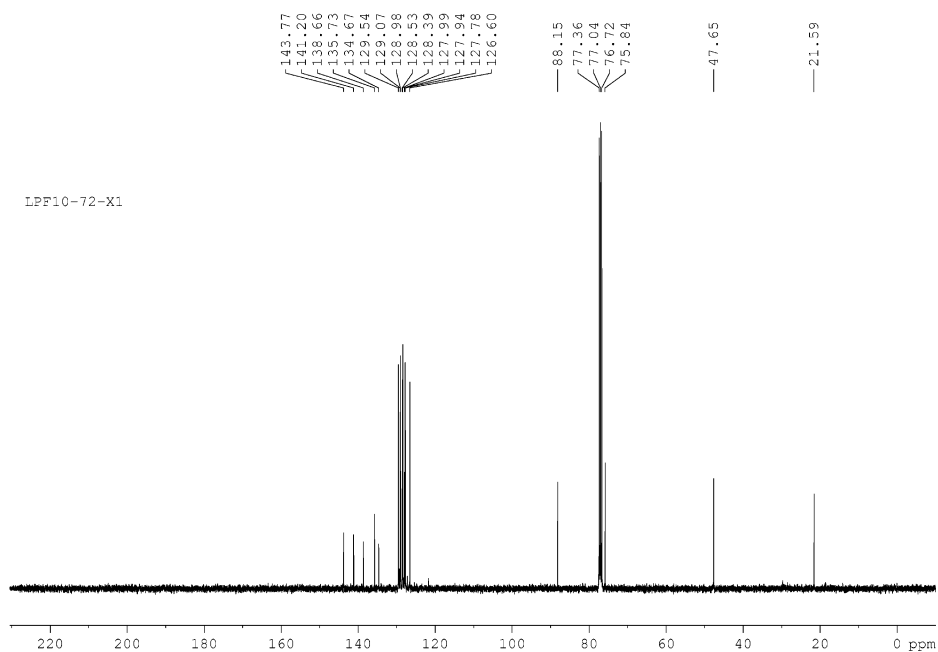

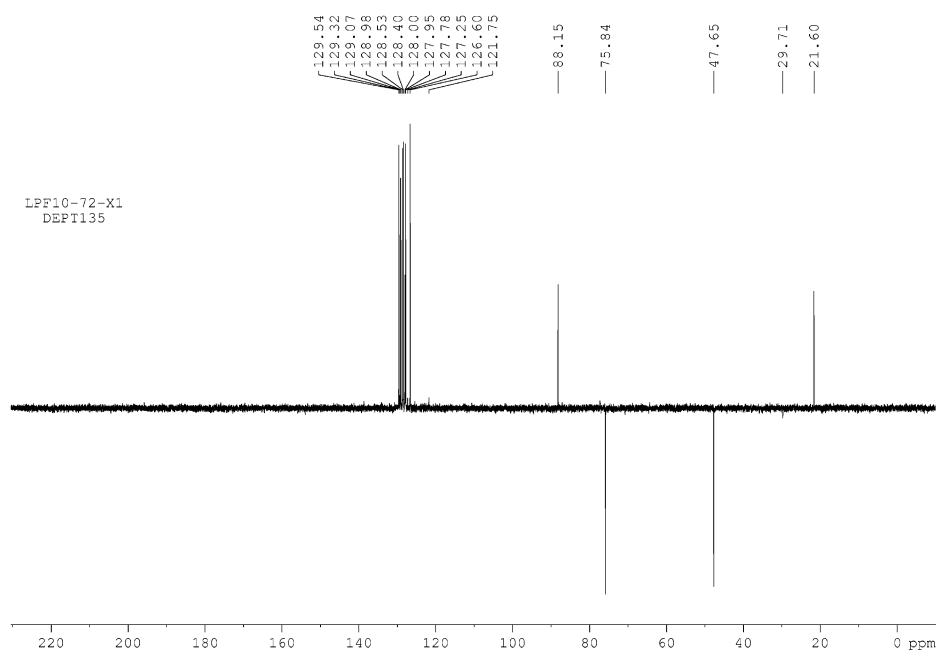

## 11. HPLC spectra

### HPLC spectra of 3

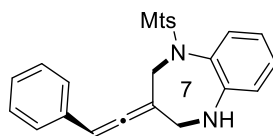

**3a**

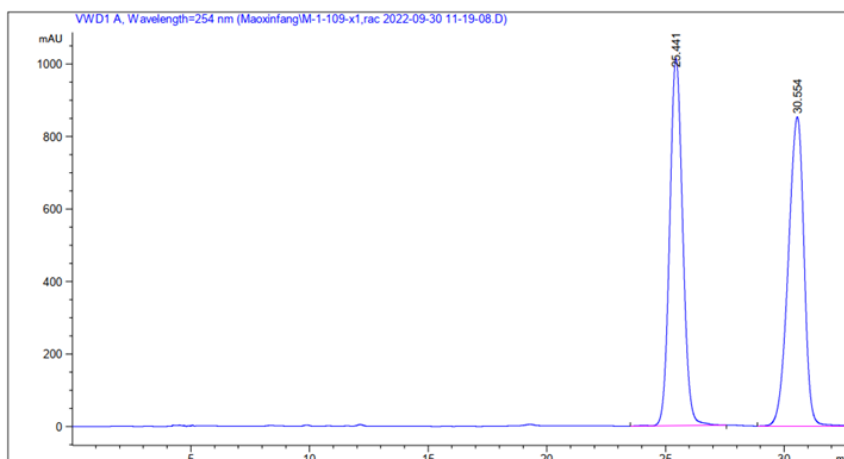

| Peak # | RetTime [min] | Type | Width [min] | Area [mAU*s] | Height [mAU] | Area %  |
|--------|---------------|------|-------------|--------------|--------------|---------|
| 1      | 25.441        | VB R | 0.5935      | 3.86090e4    | 1013.44830   | 49.5690 |
| 2      | 30.554        | BB   | 0.7243      | 3.92803e4    | 852.95270    | 50.4310 |

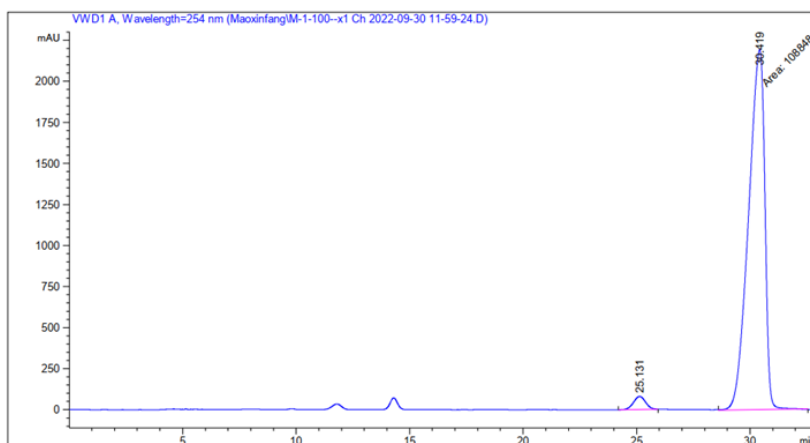

| Peak # | RetTime [min] | Type | Width [min] | Area [mAU*s] | Height [mAU] | Area %  |
|--------|---------------|------|-------------|--------------|--------------|---------|
| 1      | 25.131        | BB   | 0.5749      | 2900.77759   | 79.45480     | 2.5958  |
| 2      | 30.419        | MM   | 0.8273      | 1.08848e5    | 2192.87207   | 97.4042 |

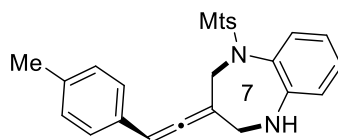

**3b**

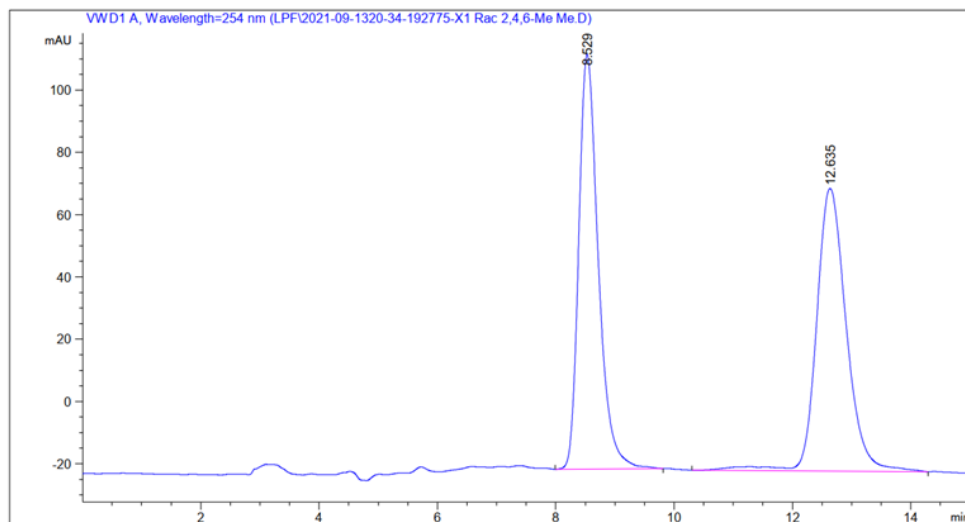

| Peak # | RetTime [min] | Type | Width [min] | Area [mAU*s] | Height [mAU] | Area %  |
|--------|---------------|------|-------------|--------------|--------------|---------|
| 1      | 8.529         | BB   | 0.3495      | 3053.55713   | 133.17072    | 48.9491 |
| 2      | 12.635        | VB R | 0.5344      | 3184.66870   | 90.75445     | 51.0509 |

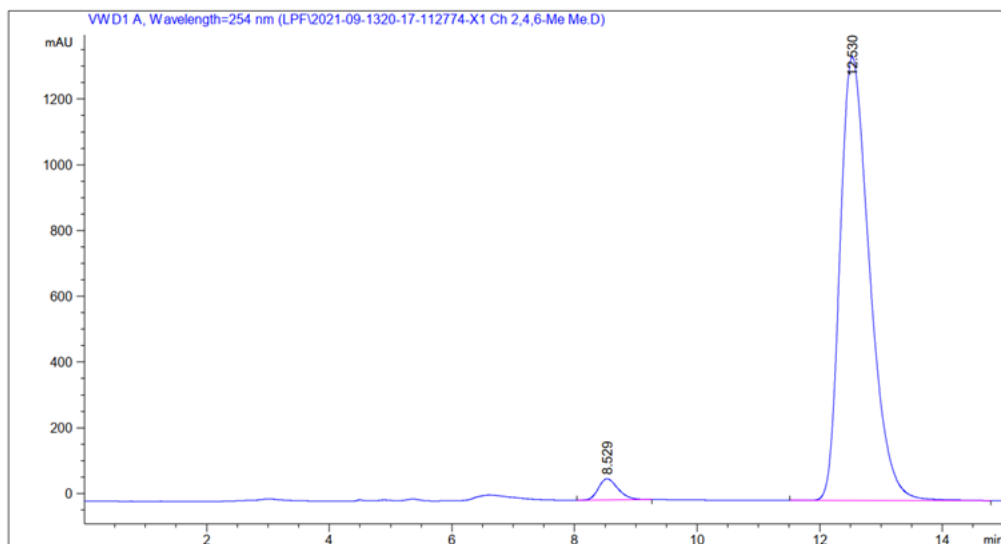

| Peak # | RetTime [min] | Type | Width [min] | Area [mAU*s] | Height [mAU] | Area %  |
|--------|---------------|------|-------------|--------------|--------------|---------|
| 1      | 8.529         | BB   | 0.3410      | 1434.49182   | 64.61596     | 3.0780  |
| 2      | 12.530        | BB   | 0.5145      | 4.51694e4    | 1349.35278   | 96.9220 |

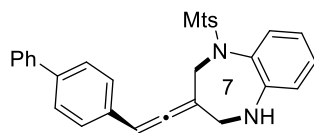

**3c**

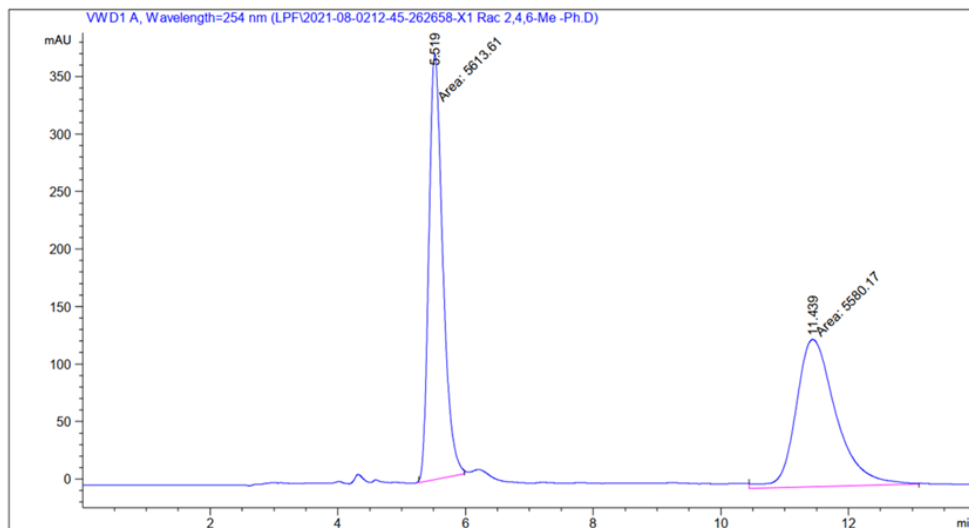

| Peak # | RetTime [min] | Type | Width [min] | Area [mAU*s] | Height [mAU] | Area %  |
|--------|---------------|------|-------------|--------------|--------------|---------|
| 1      | 5.519         | MM   | 0.2528      | 5613.60596   | 370.07678    | 50.1493 |
| 2      | 11.439        | MM   | 0.7262      | 5580.17480   | 128.07329    | 49.8507 |

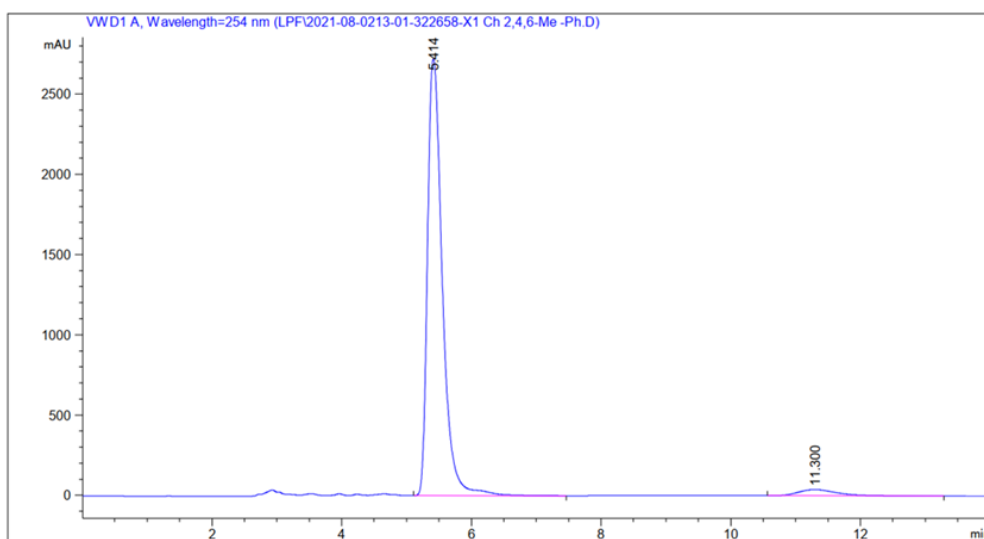

| Peak # | RetTime [min] | Type  | Width [min] | Area [mAU * s] | Height [mAU] | Area %  |
|--------|---------------|-------|-------------|----------------|--------------|---------|
| 1      | 5.414         | B B   | 0.2432      | 4.32033e4      | 2721.83691   | 96.4589 |
| 2      | 11.300        | B V R | 0.6364      | 1586.05066     | 38.27554     | 3.5411  |

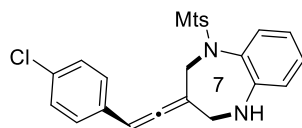

**3d**

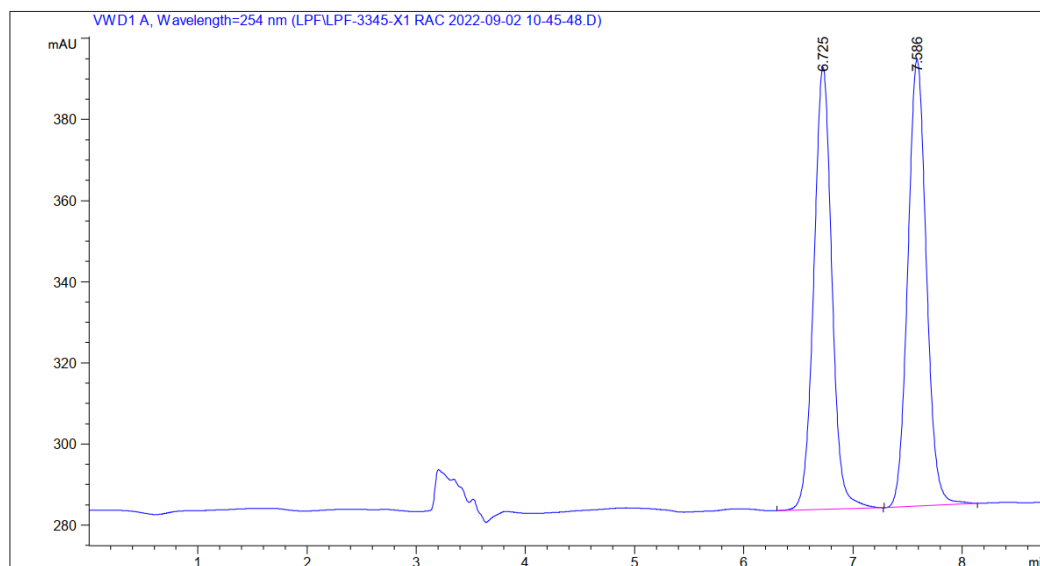

| Peak # | RetTime [min] | Type | Width [min] | Area [mAU*s] | Height [mAU] | Area %  |
|--------|---------------|------|-------------|--------------|--------------|---------|
| 1      | 6.725         | BB   | 0.1771      | 1253.70667   | 109.08978    | 49.0479 |
| 2      | 7.586         | BB   | 0.1829      | 1302.37878   | 110.17856    | 50.9521 |

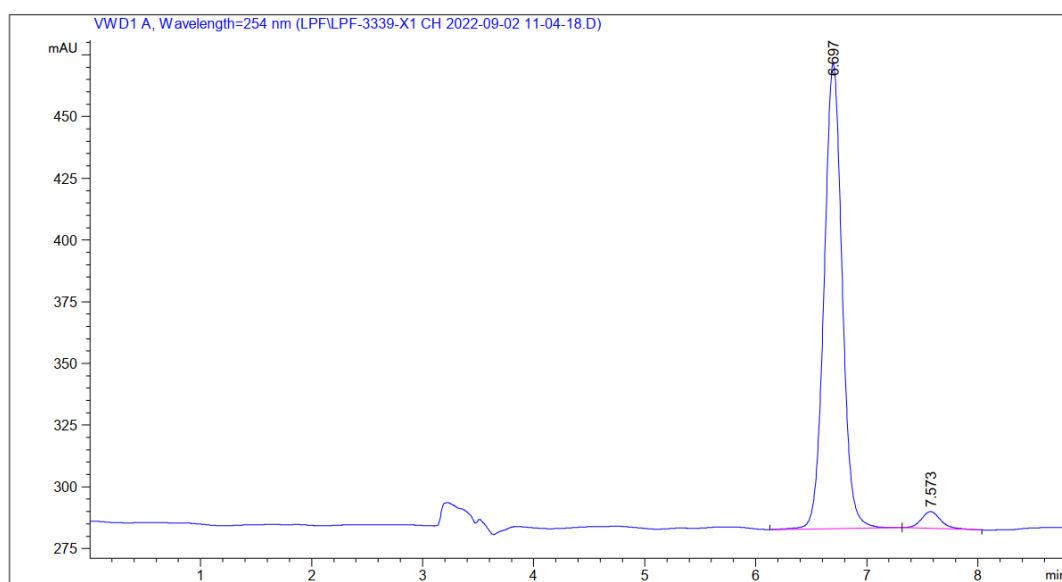

| Peak # | RetTime [min] | Type | Width [min] | Area [mAU*s] | Height [mAU] | Area %  |
|--------|---------------|------|-------------|--------------|--------------|---------|
| 1      | 6.697         | BB   | 0.1732      | 2120.05249   | 188.45082    | 96.2423 |
| 2      | 7.573         | BB   | 0.1871      | 82.77594     | 6.79612      | 3.7577  |

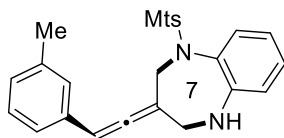

**3e**

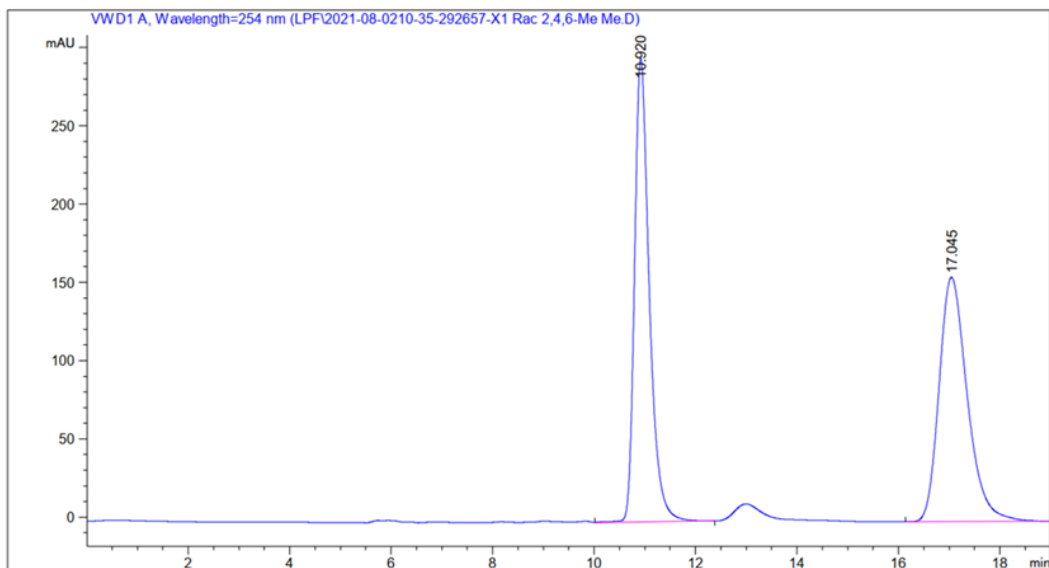

| Peak # | RetTime [min] | Type | width [min] | Area [mAU*s] | Height [mAU] | Area %  |
|--------|---------------|------|-------------|--------------|--------------|---------|
| 1      | 10.920        | BB   | 0.3060      | 5993.66943   | 296.26468    | 49.8202 |
| 2      | 17.045        | BB   | 0.5910      | 6036.92236   | 156.16983    | 50.1798 |

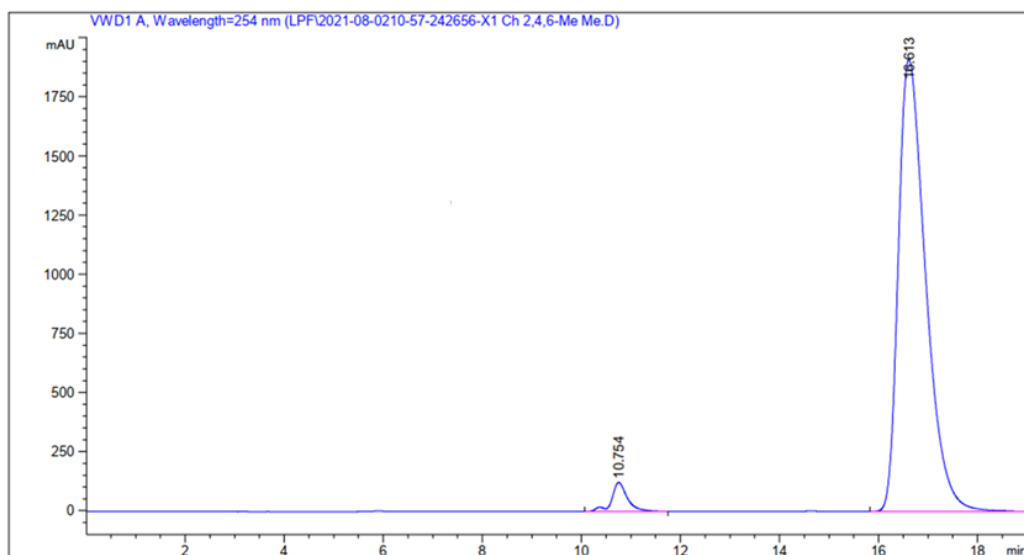

| Peak # | RetTime [min] | Type | Width [min] | Area [mAU*s] | Height [mAU] | Area %  |
|--------|---------------|------|-------------|--------------|--------------|---------|
| 1      | 10.754        | VB R | 0.3031      | 2694.65112   | 122.75300    | 3.5508  |
| 2      | 16.613        | BBA  | 0.5869      | 7.31944e4    | 1910.63049   | 96.4492 |



3f

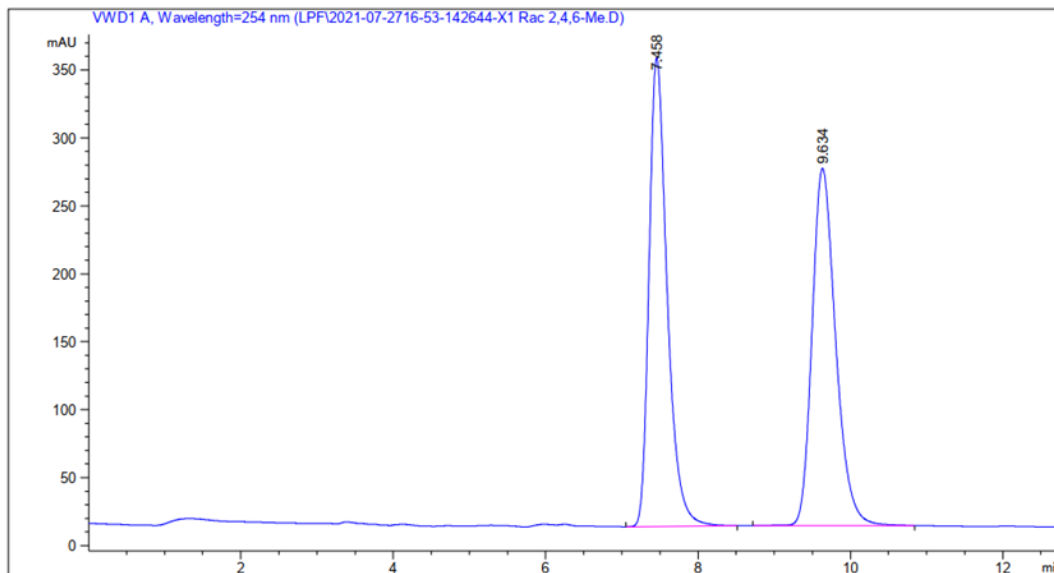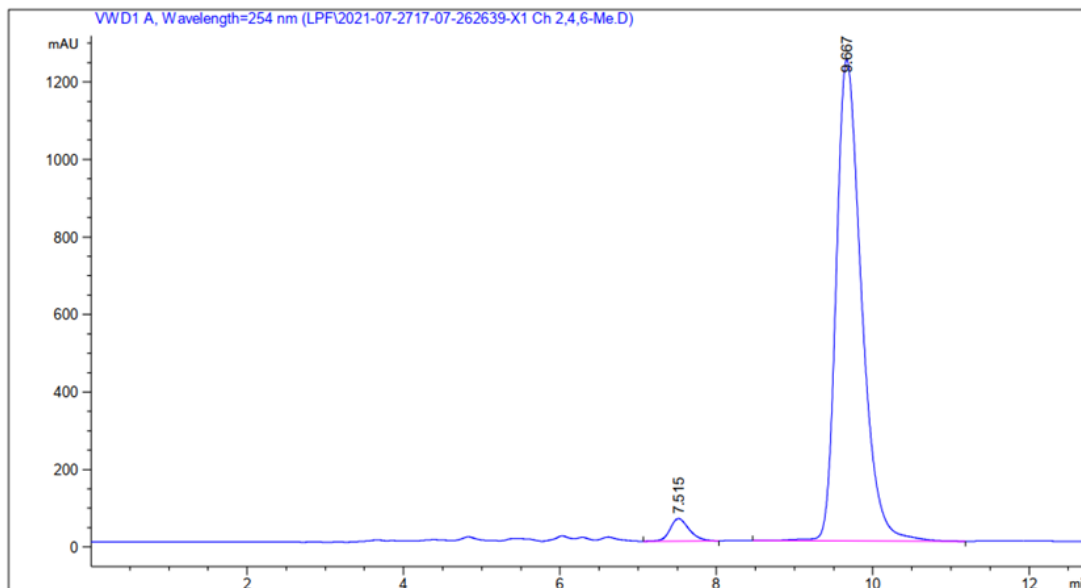



**3g**

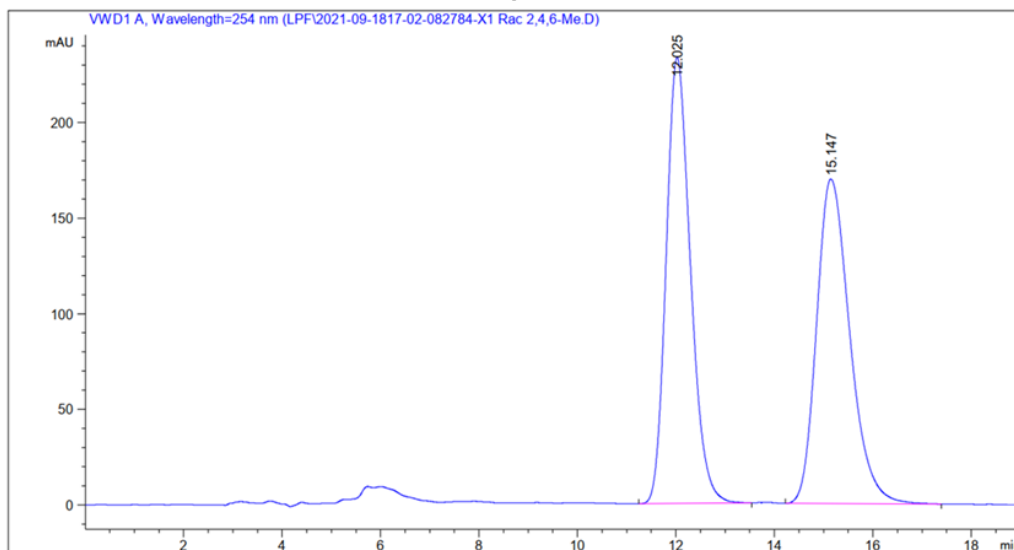

| Peak # | RetTime [min] | Type | Width [min] | Area [mAU*s] | Height [mAU] | Area %  |
|--------|---------------|------|-------------|--------------|--------------|---------|
| 1      | 12.025        | BB   | 0.5270      | 7981.79102   | 233.37532    | 50.1239 |
| 2      | 15.147        | BB   | 0.7270      | 7942.33008   | 169.69722    | 49.8761 |

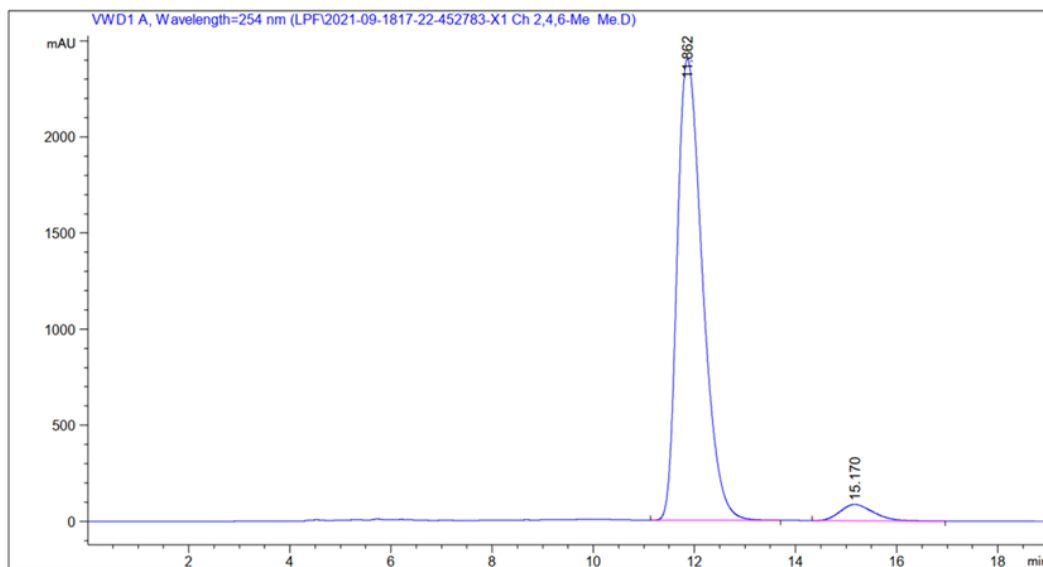

| Peak # | RetTime [min] | Type | Width [min] | Area [mAU*s] | Height [mAU] | Area %  |
|--------|---------------|------|-------------|--------------|--------------|---------|
| 1      | 11.862        | BB   | 0.5407      | 8.35248e4    | 2401.84180   | 95.5438 |
| 2      | 15.170        | BB   | 0.7054      | 3895.65356   | 85.21037     | 4.4562  |

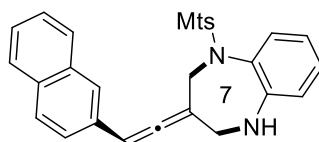

3h

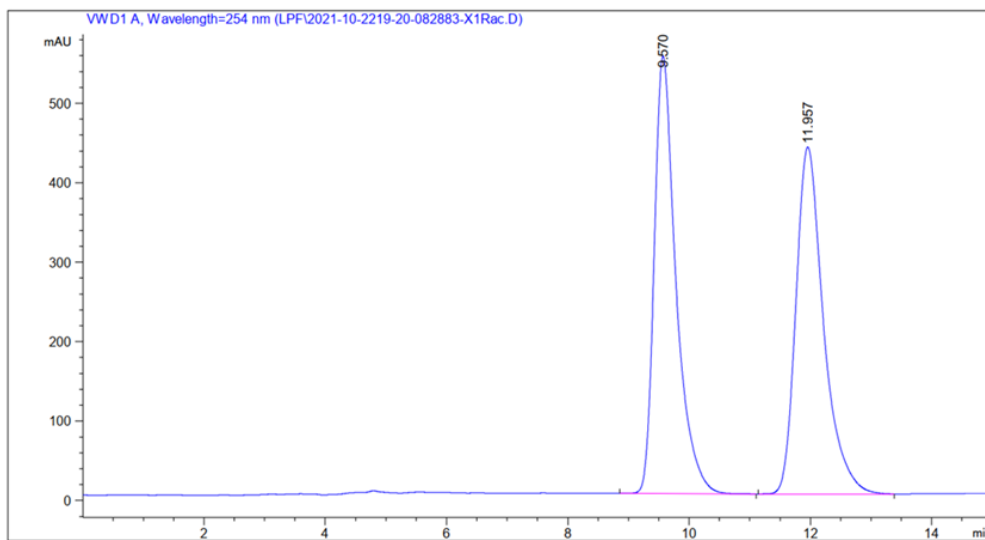

| Peak # | RetTime [min] | Type | width [min] | Area [mAU*s] | Height [mAU] | Area %  |
|--------|---------------|------|-------------|--------------|--------------|---------|
| 1      | 9.570         | BB   | 0.3715      | 1.37183e4    | 550.85828    | 49.8358 |
| 2      | 11.957        | BB   | 0.4786      | 1.38087e4    | 437.00702    | 50.1642 |

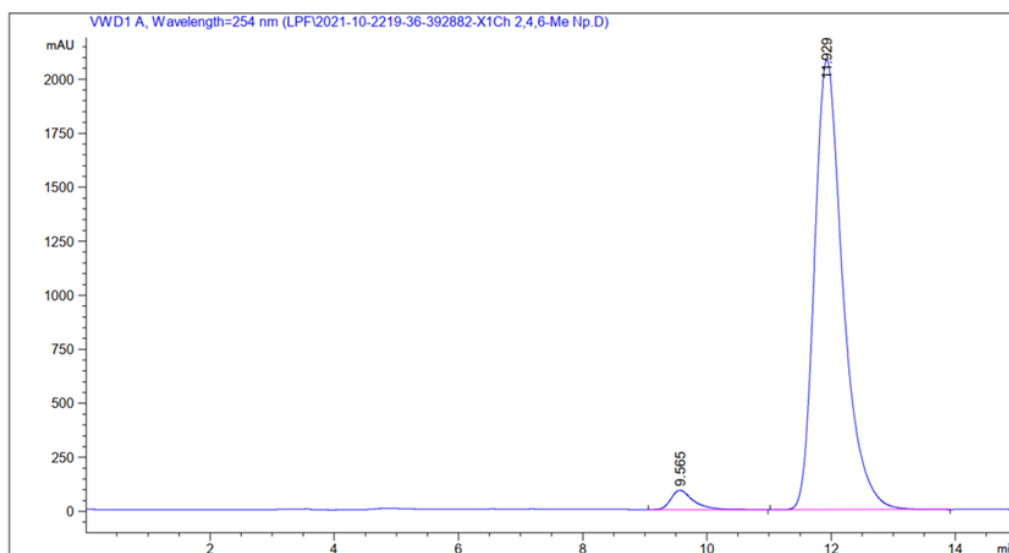

| Peak # | RetTime [min] | Type | Width [min] | Area [mAU*s] | Height [mAU] | Area %  |
|--------|---------------|------|-------------|--------------|--------------|---------|
| 1      | 9.565         | BB   | 0.3720      | 2235.71338   | 89.33067     | 3.2733  |
| 2      | 11.929        | BB   | 0.4823      | 6.60662e4    | 2081.21777   | 96.7267 |



3i

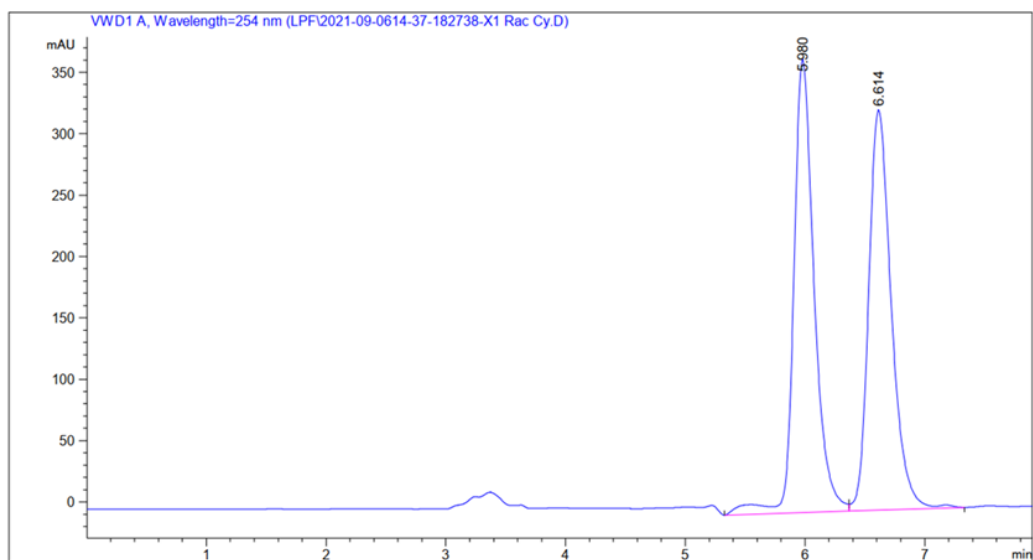

| Peak # | RetTime [min] | Type | Width [min] | Area [mAU*s] | Height [mAU] | Area %  |
|--------|---------------|------|-------------|--------------|--------------|---------|
| 1      | 5.980         | VV R | 0.1743      | 4405.71484   | 369.13498    | 50.7219 |
| 2      | 6.614         | VV R | 0.1996      | 4280.31201   | 325.97656    | 49.2781 |

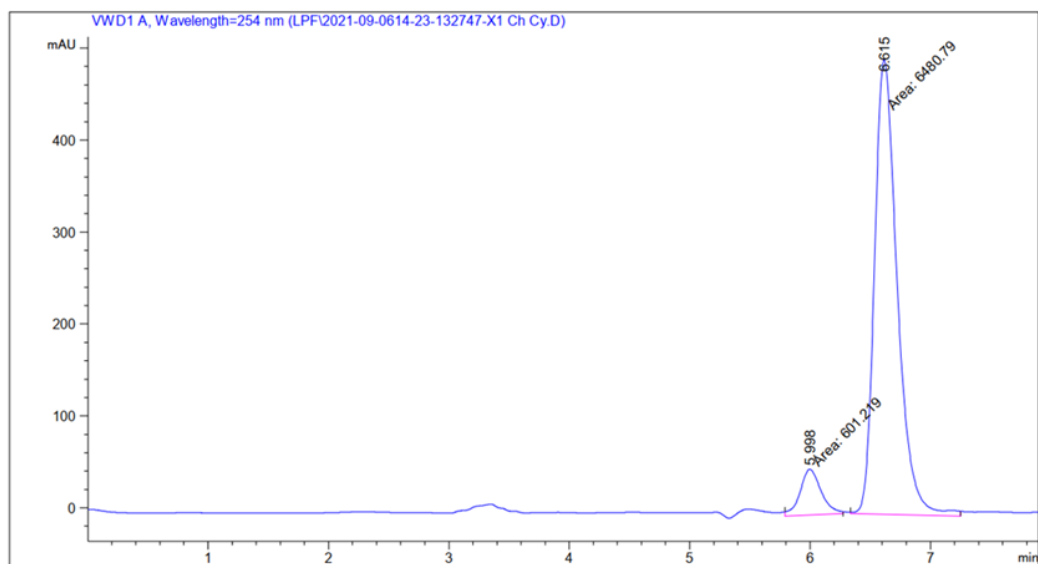

| Peak # | RetTime [min] | Type | Width [min] | Area [mAU*s] | Height [mAU] | Area %  |
|--------|---------------|------|-------------|--------------|--------------|---------|
| 1      | 5.998         | MM   | 0.2021      | 601.21899    | 49.58737     | 8.4894  |
| 2      | 6.615         | MM   | 0.2184      | 6480.79150   | 494.63123    | 91.5106 |

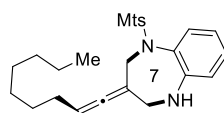

3j

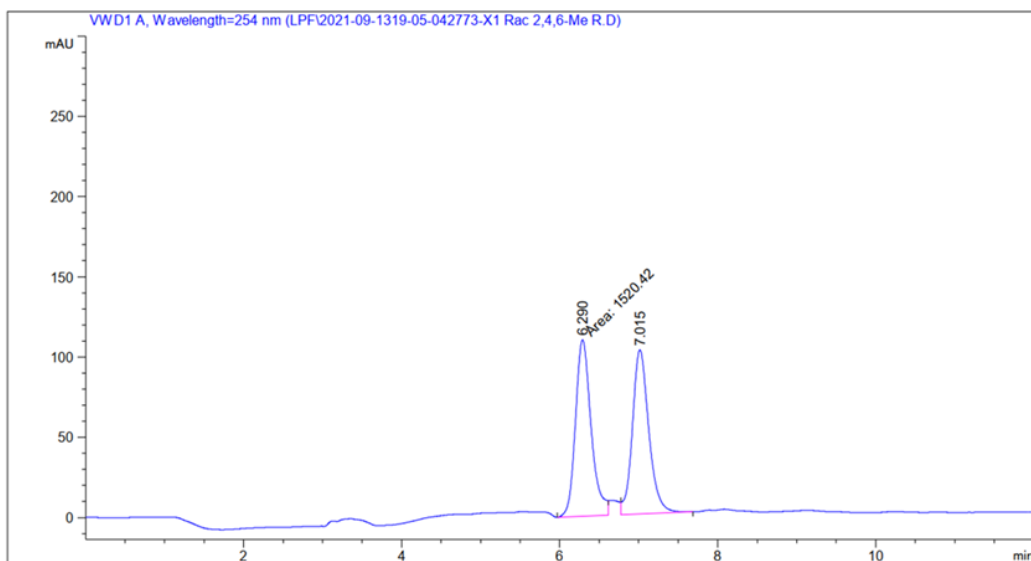

| Peak # | RetTime [min] | Type | Width [min] | Area [mAU*s] | Height [mAU] | Area %  |
|--------|---------------|------|-------------|--------------|--------------|---------|
| 1      | 6.290         | MF   | 0.2301      | 1520.42053   | 110.11102    | 50.6877 |
| 2      | 7.015         | VB   | 0.2186      | 1479.16589   | 102.35013    | 49.3123 |

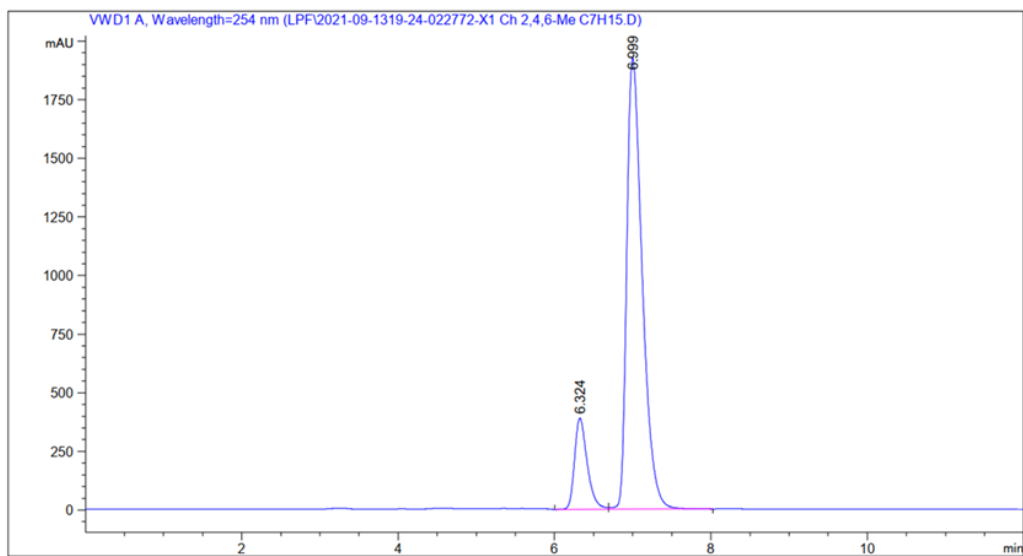

| Peak # | RetTime [min] | Type | Width [min] | Area [mAU*s] | Height [mAU] | Area %  |
|--------|---------------|------|-------------|--------------|--------------|---------|
| 1      | 6.324         | BV   | 0.1718      | 4387.98486   | 388.44748    | 14.2375 |
| 2      | 6.999         | VB   | 0.2102      | 2.64319e4    | 1925.04089   | 85.7625 |

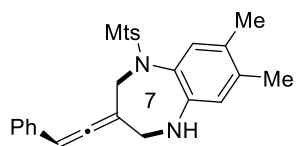

3k

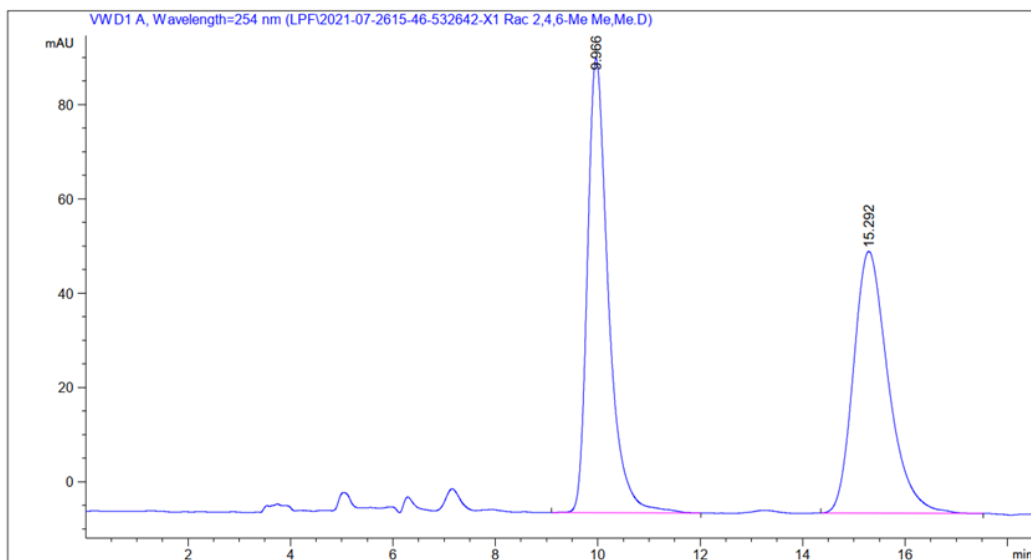

| Peak # | RetTime [min] | Type | Width [min] | Area [mAU*s] | Height [mAU] | Area %  |
|--------|---------------|------|-------------|--------------|--------------|---------|
| 1      | 9.966         | BB   | 0.4269      | 2734.41064   | 96.41417     | 51.0732 |
| 2      | 15.292        | BB   | 0.7152      | 2619.49463   | 55.54849     | 48.9268 |

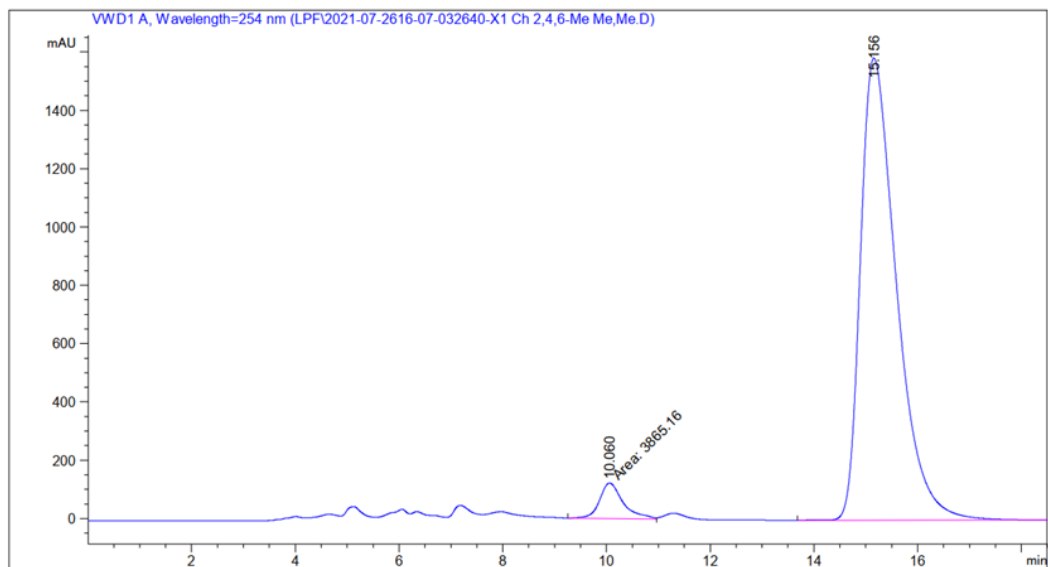

| Peak # | RetTime [min] | Type | Width [min] | Area [mAU*s] | Height [mAU] | Area %  |
|--------|---------------|------|-------------|--------------|--------------|---------|
| 1      | 10.060        | MF   | 0.5281      | 3865.15723   | 121.97577    | 4.8182  |
| 2      | 15.156        | BB   | 0.7412      | 7.63555e4    | 1584.41638   | 95.1818 |

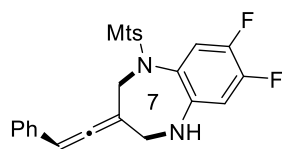

3I

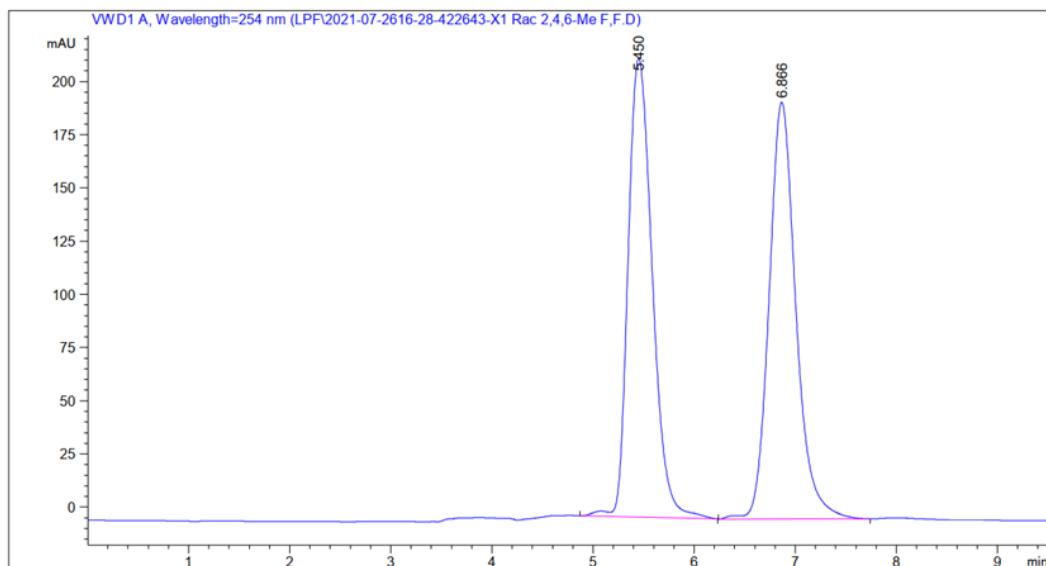

| Peak # | RetTime [min] | Type | Width [min] | Area [mAU*s] | Height [mAU] | Area %  |
|--------|---------------|------|-------------|--------------|--------------|---------|
| 1      | 5.450         | VB R | 0.2616      | 3583.56494   | 215.46179    | 49.8099 |
| 2      | 6.866         | VB R | 0.2791      | 3610.91577   | 195.83600    | 50.1901 |

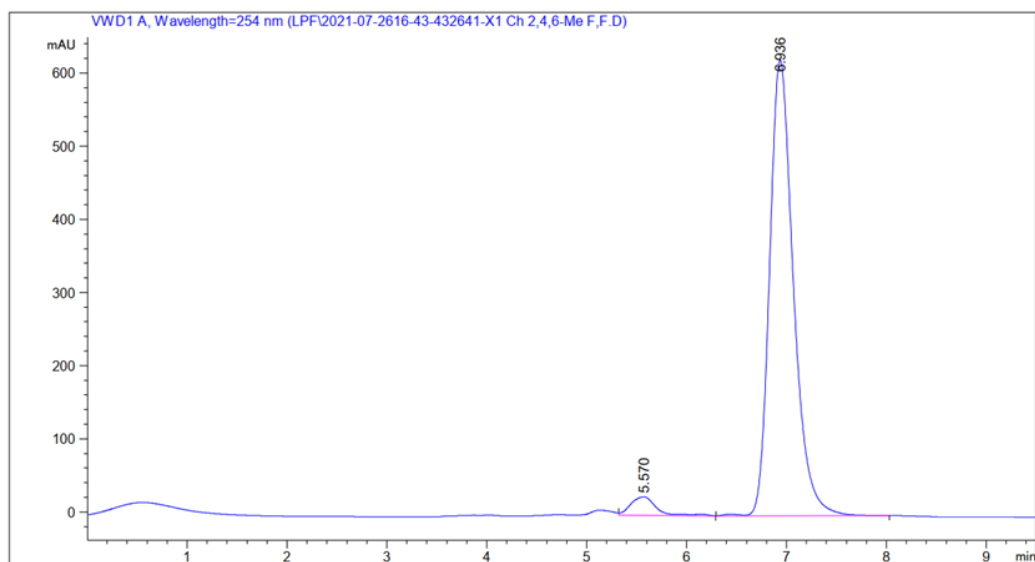

| Peak # | RetTime [min] | Type | Width [min] | Area [mAU*s] | Height [mAU] | Area %  |
|--------|---------------|------|-------------|--------------|--------------|---------|
| 1      | 5.570         | VV R | 0.2827      | 457.58356    | 25.33353     | 4.2468  |
| 2      | 6.936         | VB R | 0.2516      | 1.03173e4    | 623.37823    | 95.7532 |

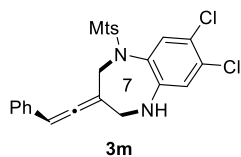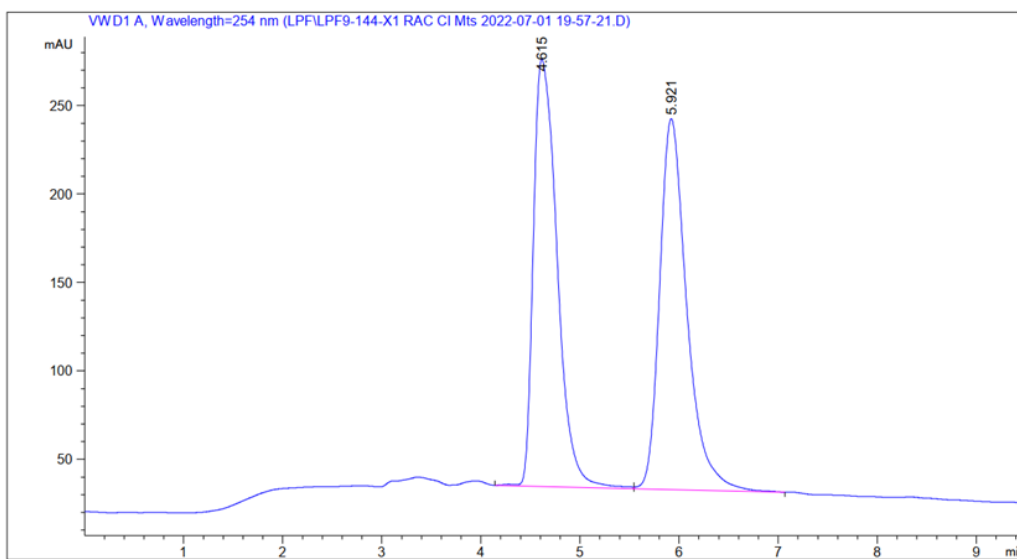

| Peak # | RetTime [min] | Type | Width [min] | Area [mAU*s] | Height [mAU] | Area %  |
|--------|---------------|------|-------------|--------------|--------------|---------|
| 1      | 4.615         | VV R | 0.2657      | 4009.13647   | 241.49821    | 50.0804 |
| 2      | 5.921         | VB   | 0.2885      | 3996.27075   | 209.58128    | 49.9196 |

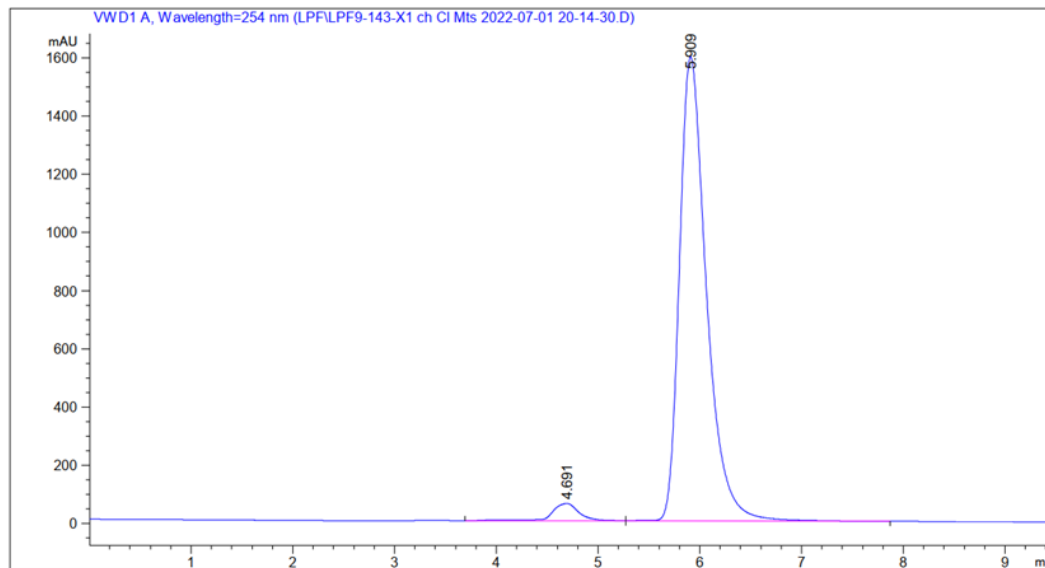

| Peak # | RetTime [min] | Type | Width [min] | Area [mAU*s] | Height [mAU] | Area %  |
|--------|---------------|------|-------------|--------------|--------------|---------|
| 1      | 4.691         | VB R | 0.2684      | 1121.33350   | 59.30951     | 3.6698  |
| 2      | 5.909         | VB R | 0.2801      | 2.94340e4    | 1596.75903   | 96.3302 |

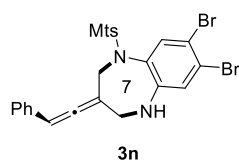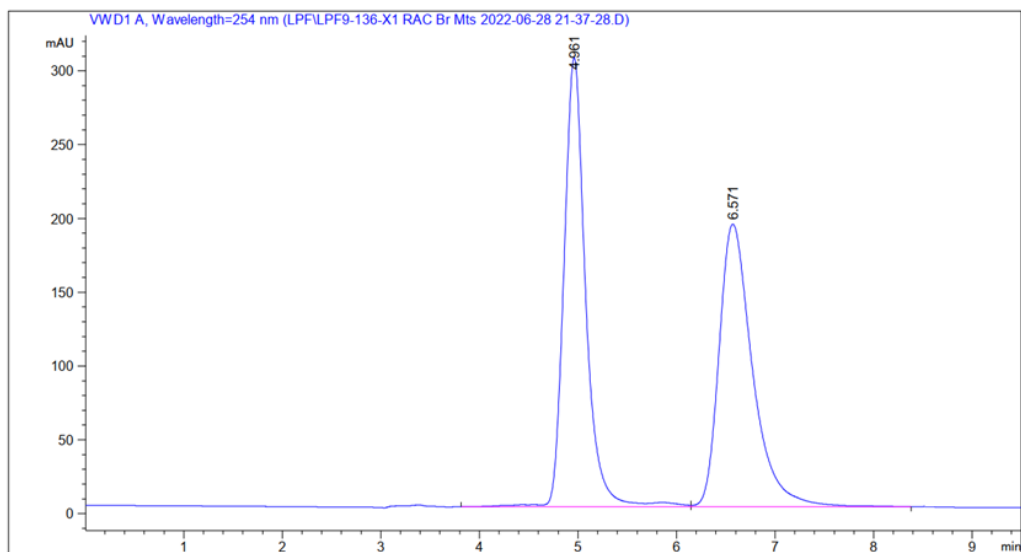

| Peak # | RetTime [min] | Type | Width [min] | Area [mAU*s] | Height [mAU] | Area %  |
|--------|---------------|------|-------------|--------------|--------------|---------|
| 1      | 4.961         | VV R | 0.2283      | 4658.89990   | 304.34665    | 50.7893 |
| 2      | 6.571         | VB   | 0.3558      | 4514.10254   | 191.63524    | 49.2107 |

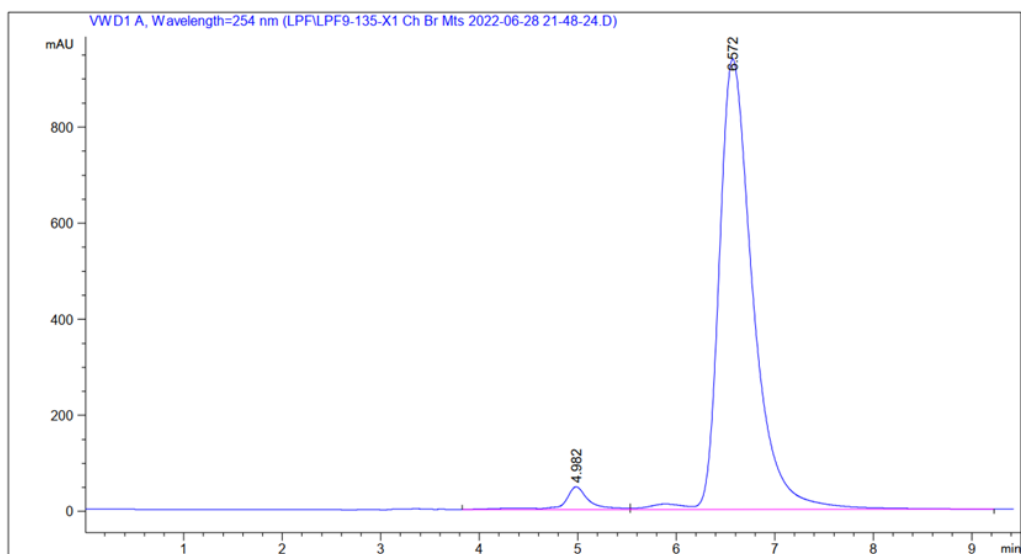

| Peak # | RetTime [min] | Type | Width [min] | Area [mAU*s] | Height [mAU] | Area %  |
|--------|---------------|------|-------------|--------------|--------------|---------|
| 1      | 4.982         | VV R | 0.2261      | 794.97290    | 47.00899     | 3.4427  |
| 2      | 6.572         | VB R | 0.3542      | 2.22966e4    | 937.35022    | 96.5573 |

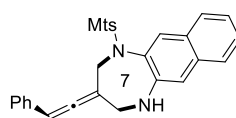

3o

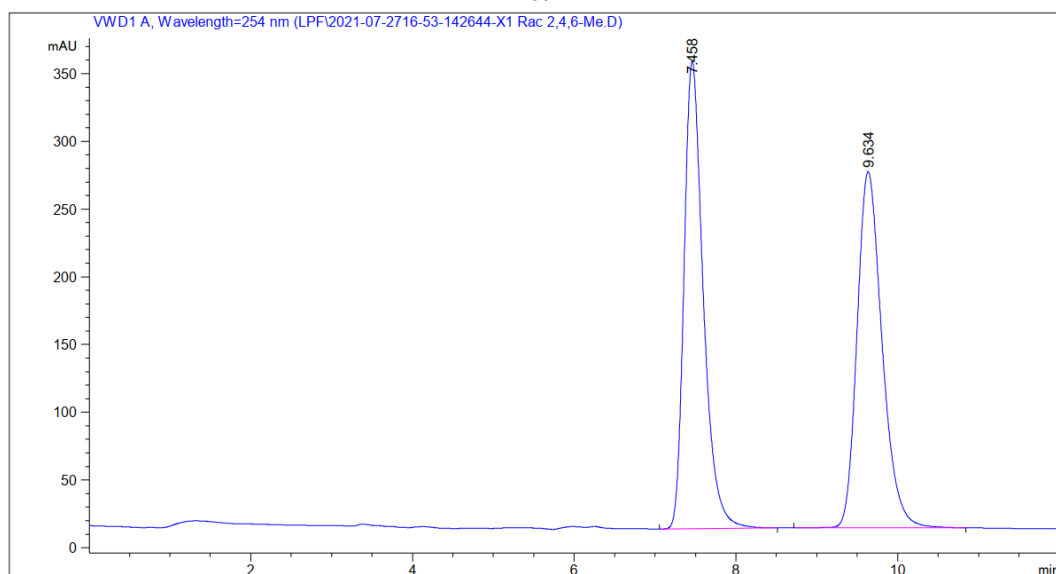

| Peak # | RetTime [min] | Type | Width [min] | Area [mAU*s] | Height [mAU] | Area %  |
|--------|---------------|------|-------------|--------------|--------------|---------|
| 1      | 7.458         | BB   | 0.2505      | 5691.47607   | 345.00690    | 50.1586 |
| 2      | 9.634         | BB   | 0.3289      | 5655.47656   | 262.94412    | 49.8414 |

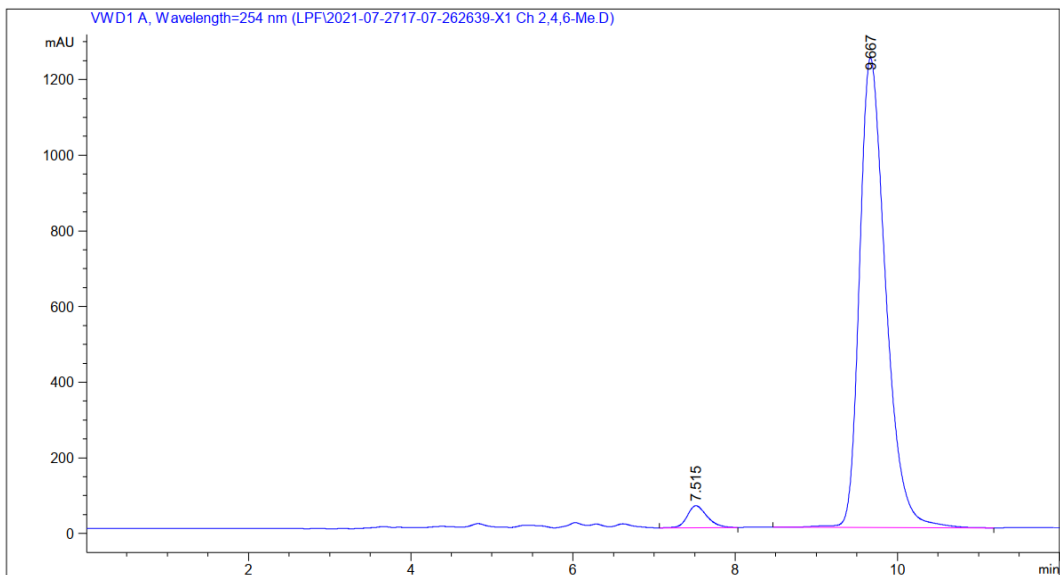

| Peak # | RetTime [min] | Type | Width [min] | Area [mAU*s] | Height [mAU] | Area %  |
|--------|---------------|------|-------------|--------------|--------------|---------|
| 1      | 7.515         | BB   | 0.2566      | 976.17487    | 57.92714     | 3.3925  |
| 2      | 9.667         | BB   | 0.3432      | 2.77980e4    | 1241.66382   | 96.6075 |

## HPLC spectra of 4

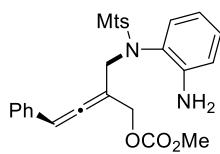

4a

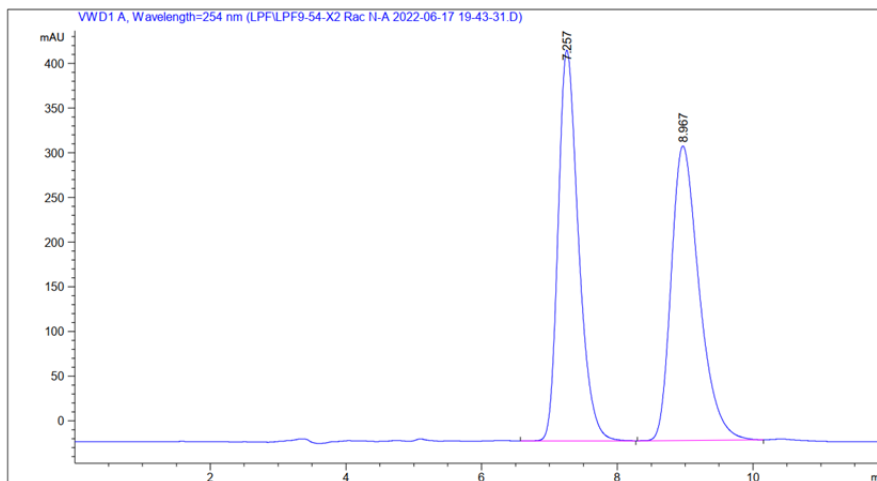

| Peak # | RetTime [min] | Type | Width [min] | Area [mAU*s] | Height [mAU] | Area %  |
|--------|---------------|------|-------------|--------------|--------------|---------|
| 1      | 7.257         | BB   | 0.3176      | 9124.85547   | 437.07202    | 49.1833 |
| 2      | 8.967         | BB   | 0.4369      | 9427.89648   | 329.37833    | 50.8167 |

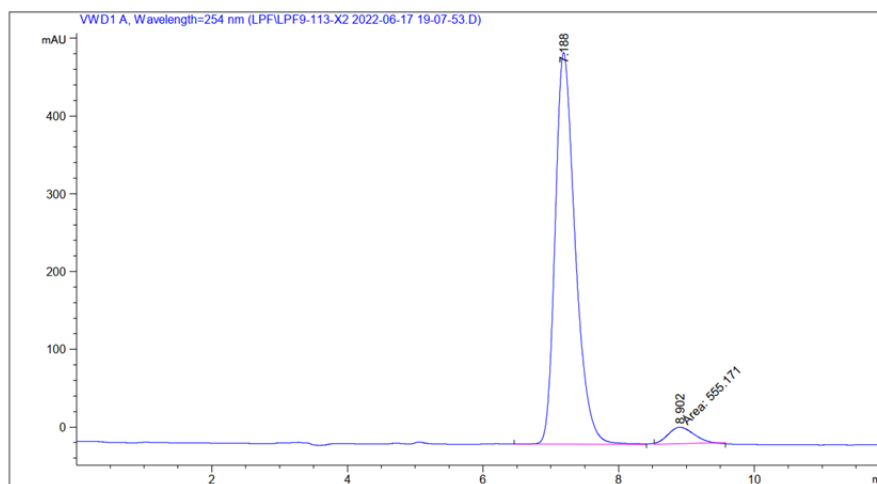

| Peak # | RetTime [min] | Type | Width [min] | Area [mAU*s] | Height [mAU] | Area %  |
|--------|---------------|------|-------------|--------------|--------------|---------|
| 1      | 7.188         | BV   | 0.3125      | 1.03275e4    | 503.14160    | 94.8986 |
| 2      | 8.902         | MM   | 0.4392      | 555.17096    | 21.06831     | 5.1014  |

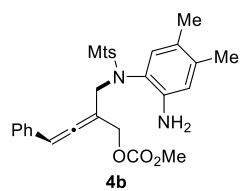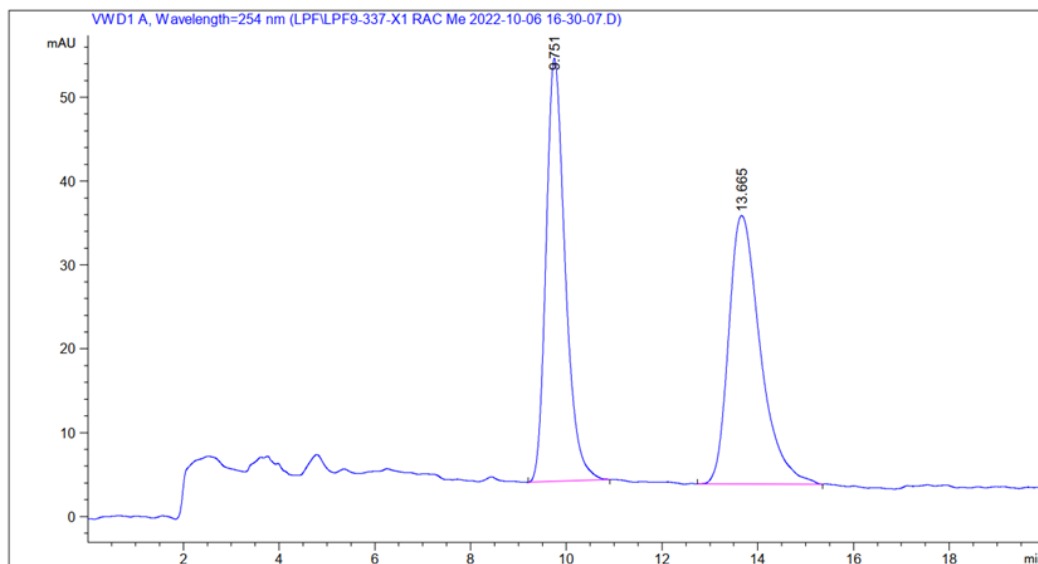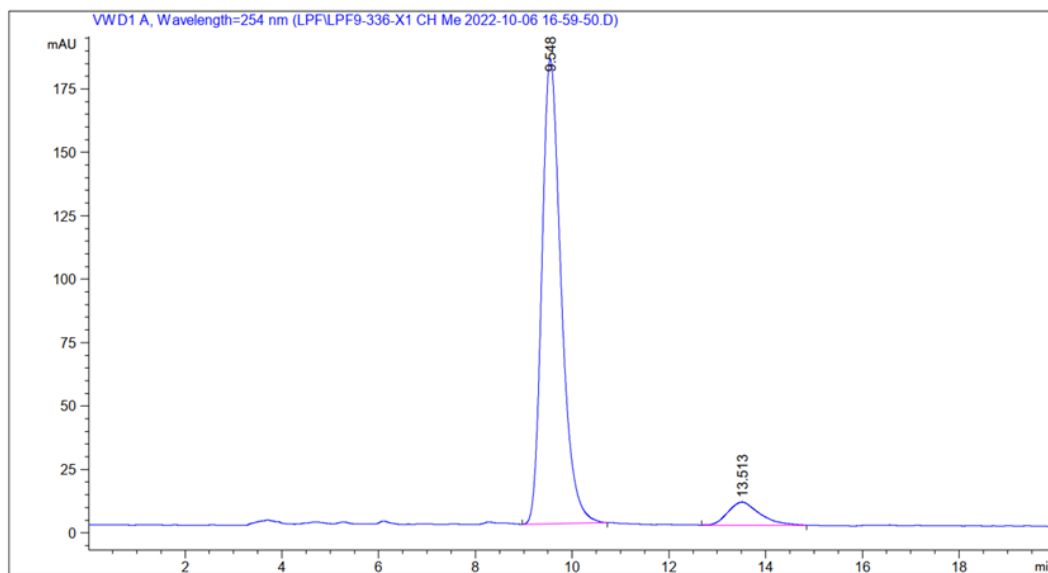

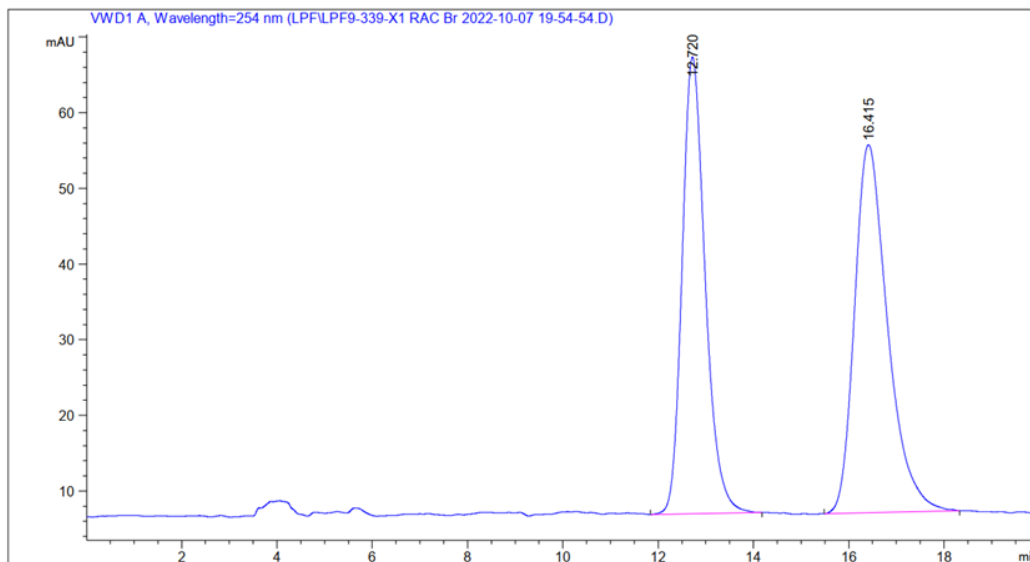

| Peak # | RetTime [min] | Type | Width [min] | Area [mAU*s] | Height [mAU] | Area %  |
|--------|---------------|------|-------------|--------------|--------------|---------|
| 1      | 12.720        | BB   | 0.5170      | 2027.60803   | 60.34974     | 46.3352 |
| 2      | 16.415        | BB   | 0.7404      | 2348.34448   | 48.62693     | 53.6648 |

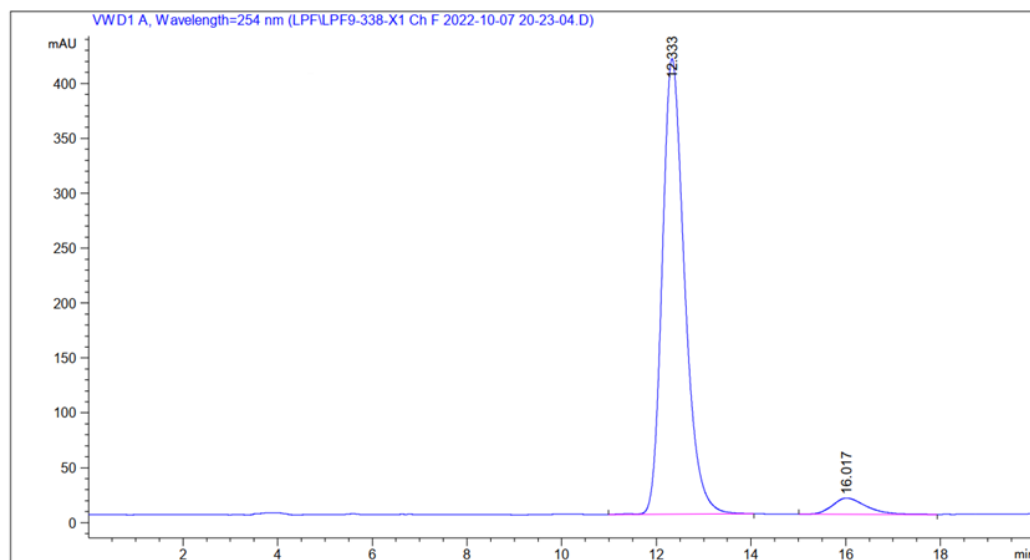

| Peak # | RetTime [min] | Type | Width [min] | Area [mAU*s] | Height [mAU] | Area %  |
|--------|---------------|------|-------------|--------------|--------------|---------|
| 1      | 12.333        | BB   | 0.5025      | 1.36032e4    | 414.88126    | 94.9208 |
| 2      | 16.017        | BB   | 0.7274      | 727.90375    | 14.75849     | 5.0792  |

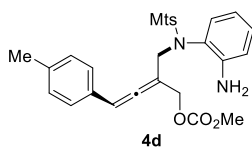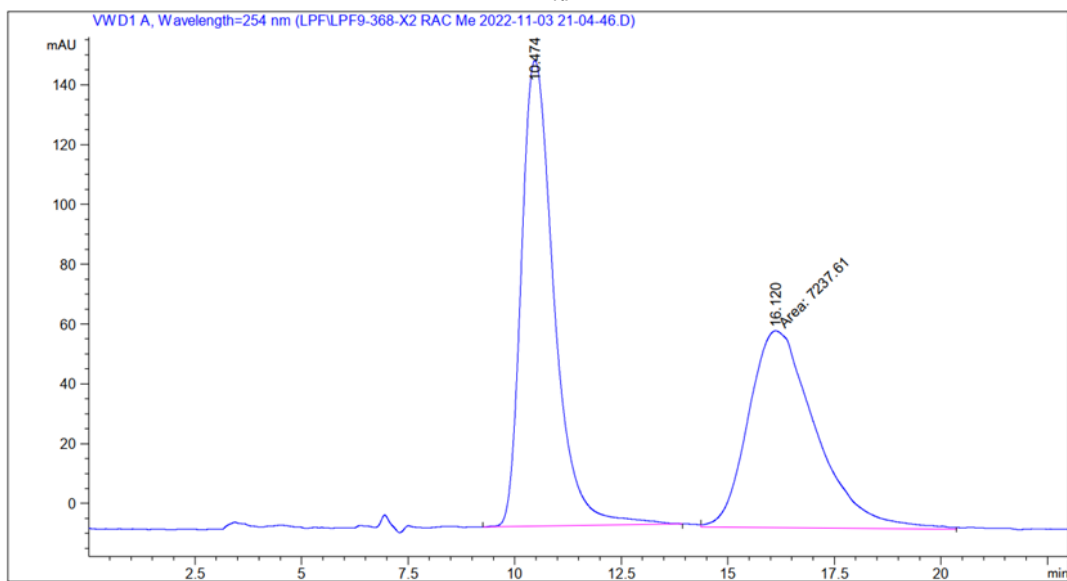

| Peak # | RetTime [min] | Type | Width [min] | Area [mAU*s] | Height [mAU] | Area %  |
|--------|---------------|------|-------------|--------------|--------------|---------|
| 1      | 10.474        | BB   | 0.8311      | 8291.98242   | 155.76305    | 53.3947 |
| 2      | 16.120        | MM   | 1.8315      | 7237.61133   | 65.86270     | 46.6053 |

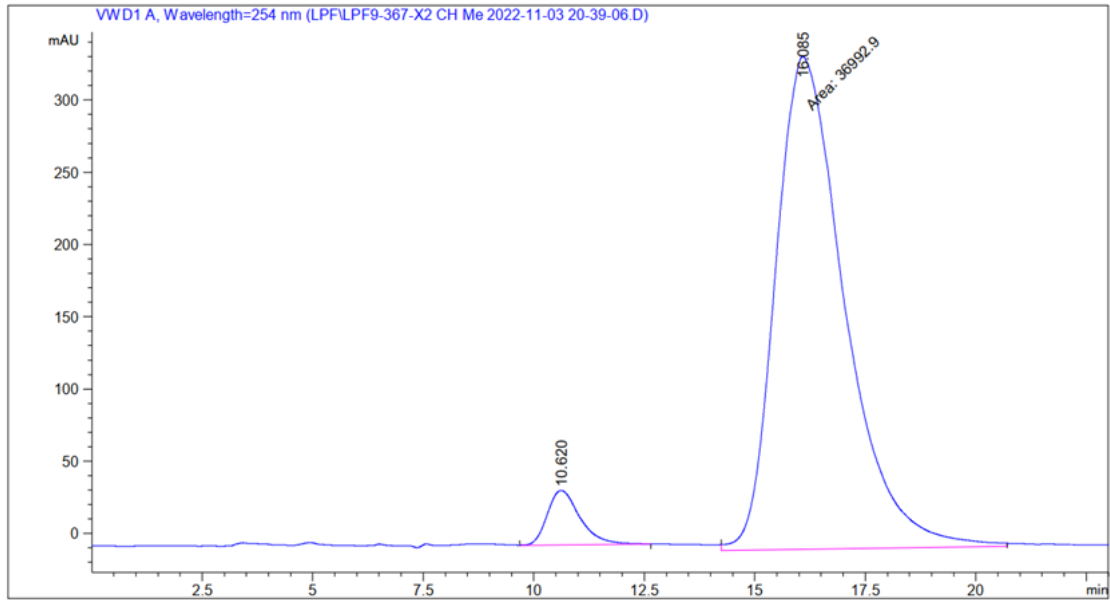

| Peak # | RetTime [min] | Type | Width [min] | Area [mAU*s] | Height [mAU] | Area %  |
|--------|---------------|------|-------------|--------------|--------------|---------|
| 1      | 10.620        | BB   | 0.7868      | 1925.47168   | 37.57972     | 4.9475  |
| 2      | 16.085        | MM   | 1.8070      | 3.69929e4    | 341.20490    | 95.0525 |

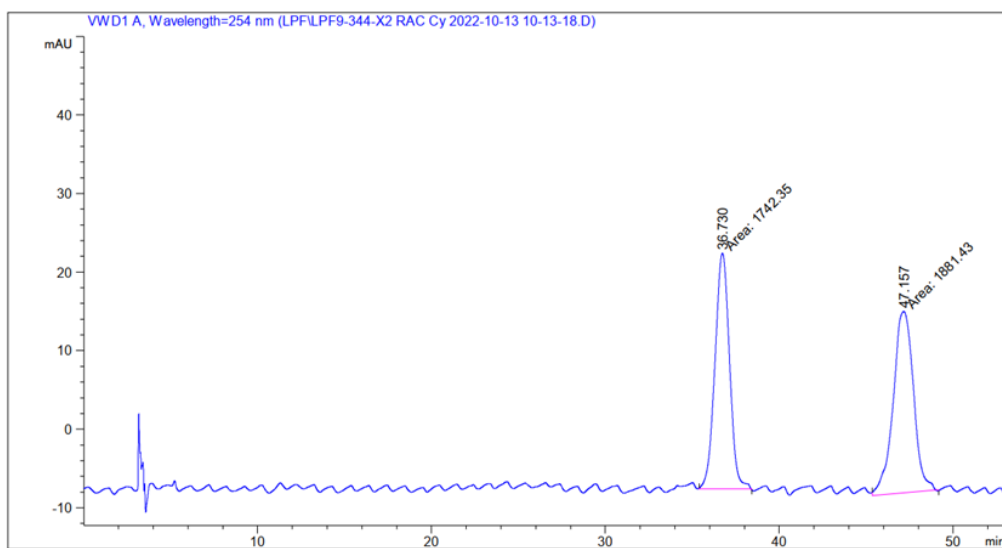

| Peak # | RetTime [min] | Type | Width [min] | Area [mAU*s] | Height [mAU] | Area %  |
|--------|---------------|------|-------------|--------------|--------------|---------|
| 1      | 36.730        | MM   | 0.9682      | 1742.34827   | 29.99313     | 48.0810 |
| 2      | 47.157        | MM   | 1.3575      | 1881.42603   | 23.09932     | 51.9190 |

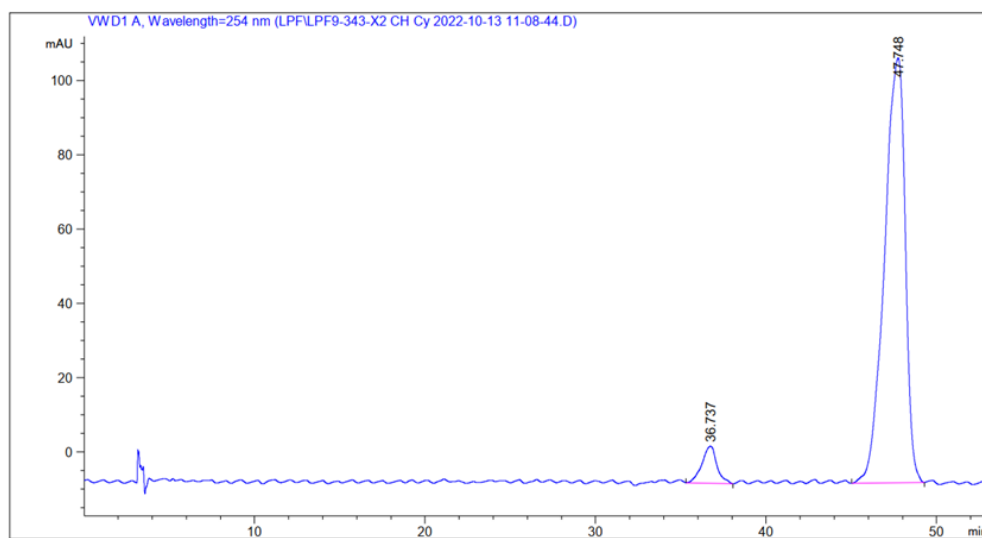

| Peak # | RetTime [min] | Type | Width [min] | Area [mAU*s] | Height [mAU] | Area %  |
|--------|---------------|------|-------------|--------------|--------------|---------|
| 1      | 36.737        | BB   | 0.8925      | 606.13983    | 9.93844      | 5.8849  |
| 2      | 47.748        | BB   | 1.2213      | 9693.84863   | 114.32286    | 94.1151 |

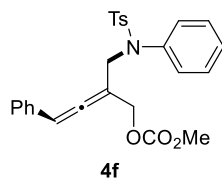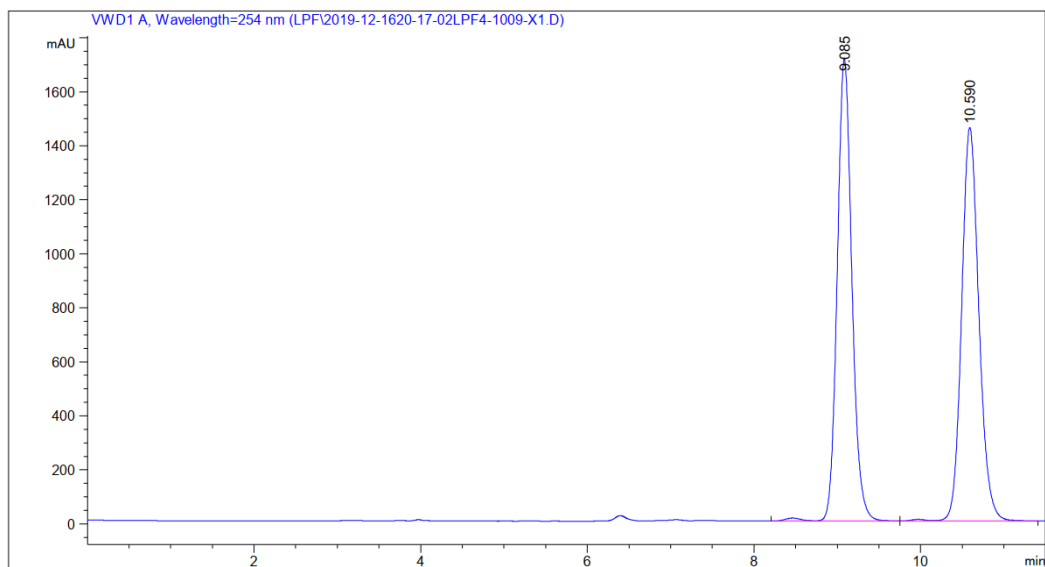

| Peak # | RetTime [min] | Type | Width [min] | Area [mAU*s] | Height [mAU] | Area %  |
|--------|---------------|------|-------------|--------------|--------------|---------|
| 1      | 9.085         | VB R | 0.1872      | 2.10058e4    | 1711.10156   | 49.9772 |
| 2      | 10.590        | VB R | 0.2208      | 2.10250e4    | 1456.85413   | 50.0228 |

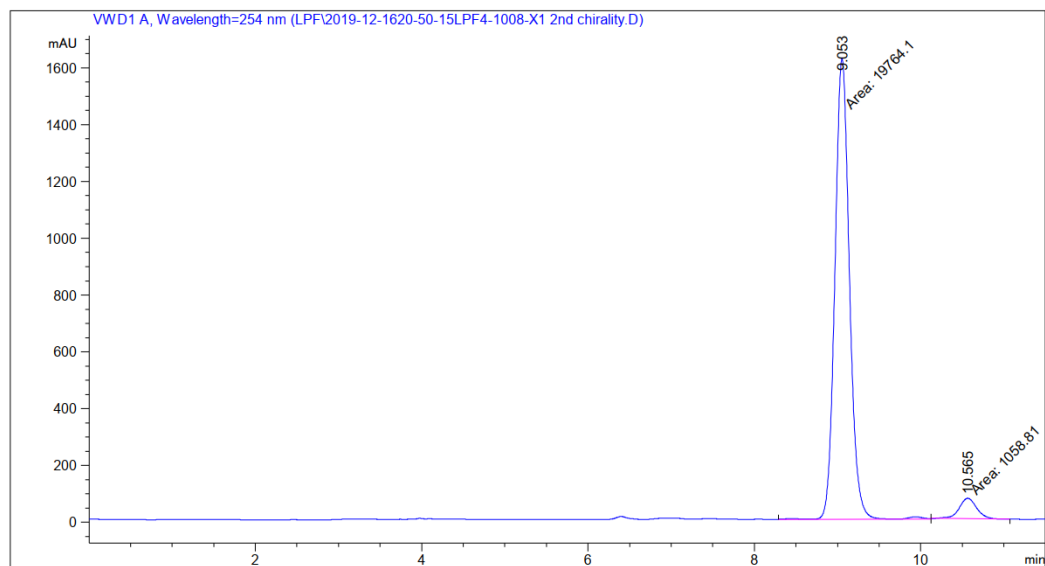

| Peak # | RetTime [min] | Type | Width [min] | Area [mAU*s] | Height [mAU] | Area %  |
|--------|---------------|------|-------------|--------------|--------------|---------|
| 1      | 9.053         | MM   | 0.2030      | 1.97641e4    | 1622.75562   | 94.9152 |
| 2      | 10.565        | MM   | 0.2448      | 1058.81433   | 72.07870     | 5.0848  |

## HPLC spectra of 9

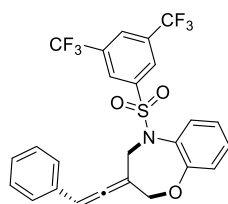

9a

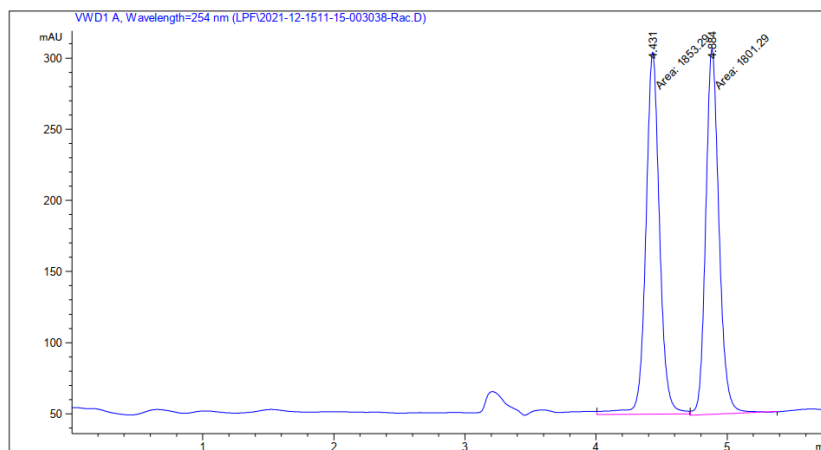

| Peak # | RetTime [min] | Type | Width [min] | Area [mAU*s] | Height [mAU] | Area %  |
|--------|---------------|------|-------------|--------------|--------------|---------|
| 1      | 4.431         | FM   | 0.1215      | 1853.29468   | 254.24162    | 50.7114 |
| 2      | 4.884         | MM   | 0.1169      | 1801.29443   | 256.89578    | 49.2886 |

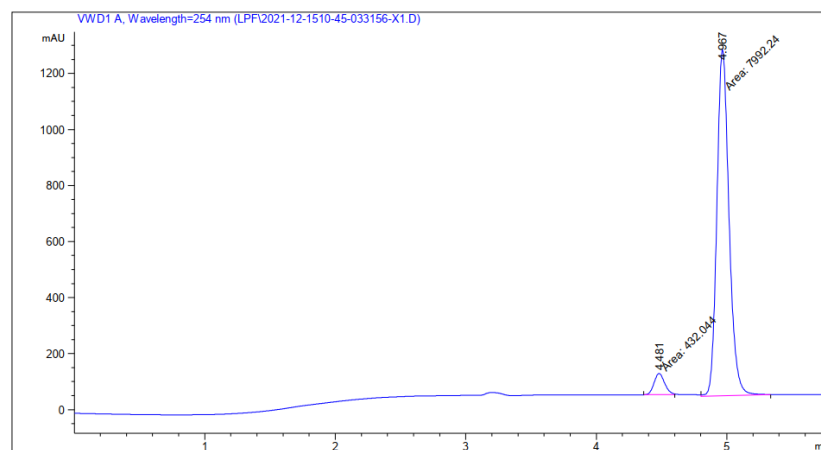

| Peak # | RetTime [min] | Type | Width [min] | Area [mAU*s] | Height [mAU] | Area %  |
|--------|---------------|------|-------------|--------------|--------------|---------|
| 1      | 4.481         | MM   | 0.0946      | 432.04440    | 76.11656     | 5.1286  |
| 2      | 4.967         | MM   | 0.1078      | 7992.24316   | 1235.10425   | 94.8714 |

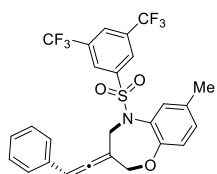

9b

Auto-Scaled Chromatogram

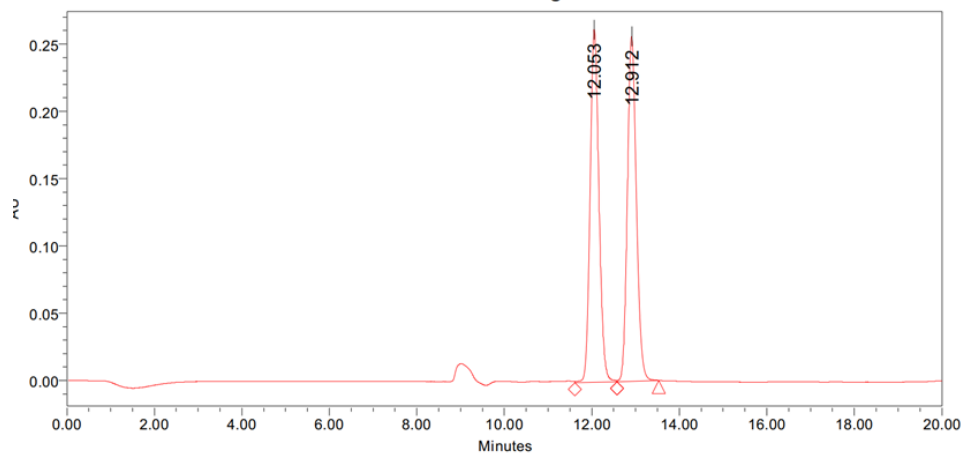

Peak Results

|   | Name | RT     | Area    | Height | % Area | Peak Width (sec) |
|---|------|--------|---------|--------|--------|------------------|
| 1 |      | 12.053 | 3679966 | 262041 | 50.18  | 30.00            |
| 2 |      | 12.912 | 3653694 | 256223 | 49.82  | 30.00            |

Auto-Scaled Chromatogram

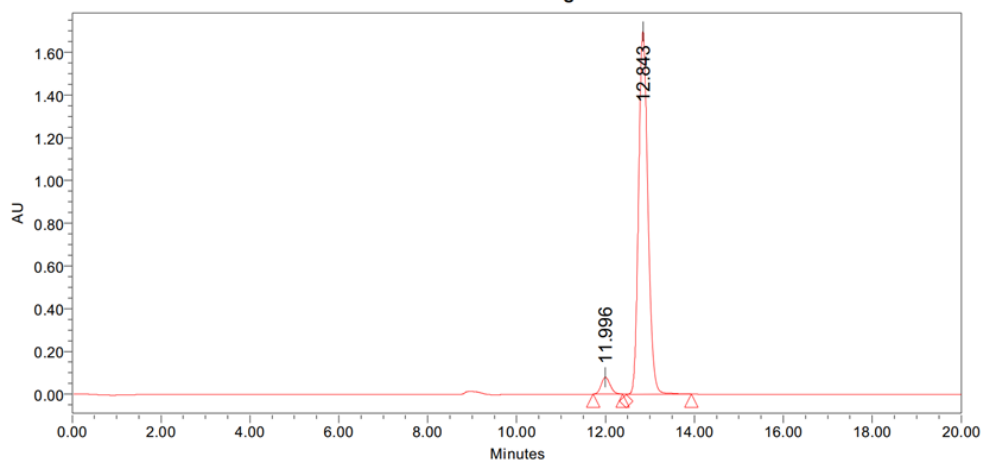

Peak Results

|   | Name | RT     | Area     | Height  | % Area | Peak Width (sec) |
|---|------|--------|----------|---------|--------|------------------|
| 1 |      | 11.996 | 1105519  | 78805   | 4.26   | 30.00            |
| 2 |      | 12.843 | 24816484 | 1699008 | 95.74  | 30.00            |

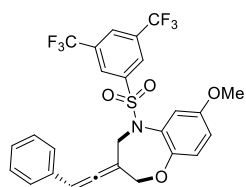

9c

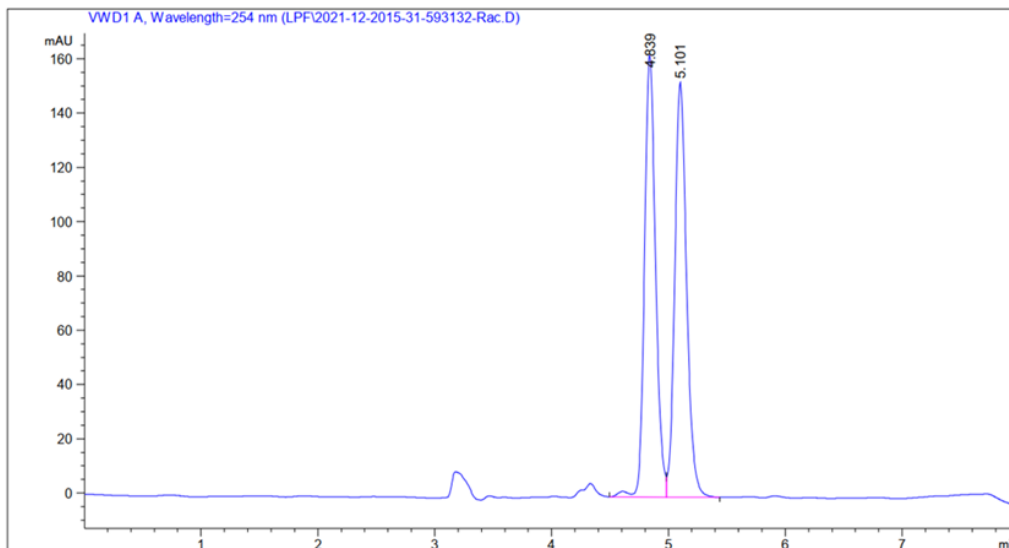

| Peak # | RetTime [min] | Type | Width [min] | Area [mAU*s] | Height [mAU] | Area %  |
|--------|---------------|------|-------------|--------------|--------------|---------|
| 1      | 4.839         | VV R | 0.1001      | 1075.15686   | 162.71704    | 49.9954 |
| 2      | 5.101         | VB   | 0.1081      | 1075.35315   | 152.89691    | 50.0046 |

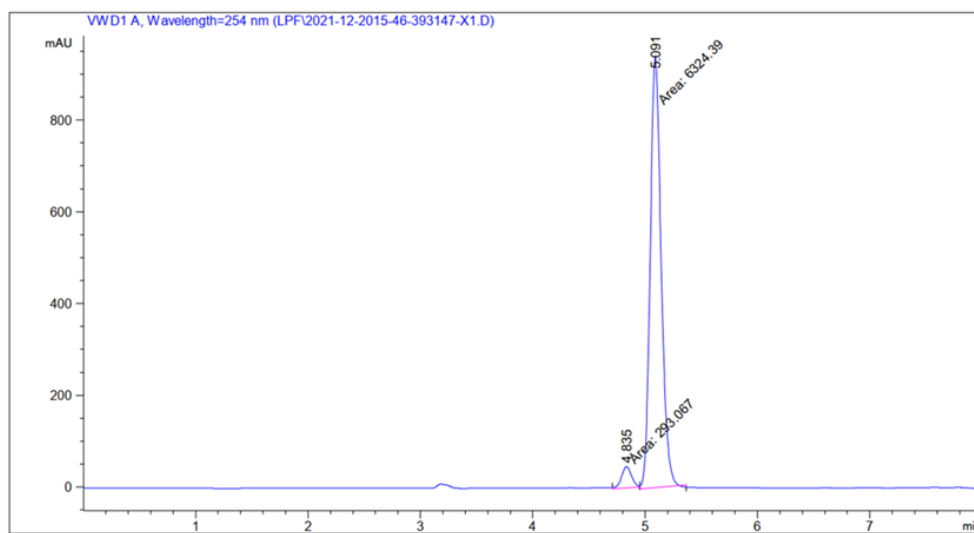

| Peak # | RetTime [min] | Type | Width [min] | Area [mAU*s] | Height [mAU] | Area %  |
|--------|---------------|------|-------------|--------------|--------------|---------|
| 1      | 4.835         | MM   | 0.1050      | 293.06735    | 46.51565     | 4.4287  |
| 2      | 5.091         | MM   | 0.1123      | 6324.39355   | 938.66296    | 95.5713 |

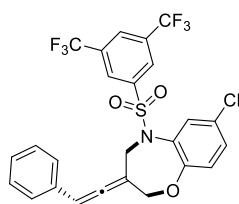

9d

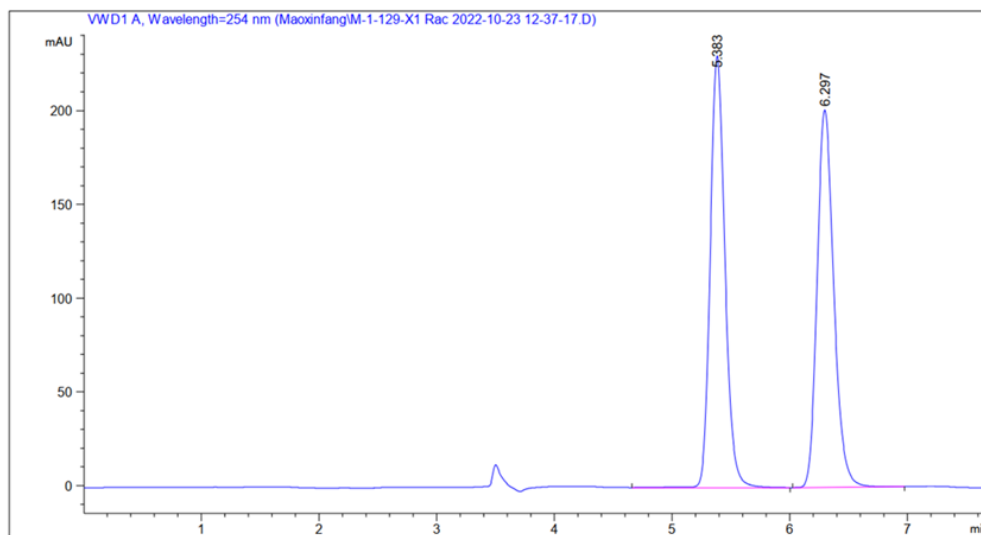

| Peak # | RetTime [min] | Type | Width [min] | Area [mAU*s] | Height [mAU] | Area %  |
|--------|---------------|------|-------------|--------------|--------------|---------|
| 1      | 5.383         | BB   | 0.1347      | 2005.86682   | 230.18884    | 50.3140 |
| 2      | 6.297         | BB   | 0.1519      | 1980.83411   | 201.19957    | 49.6860 |

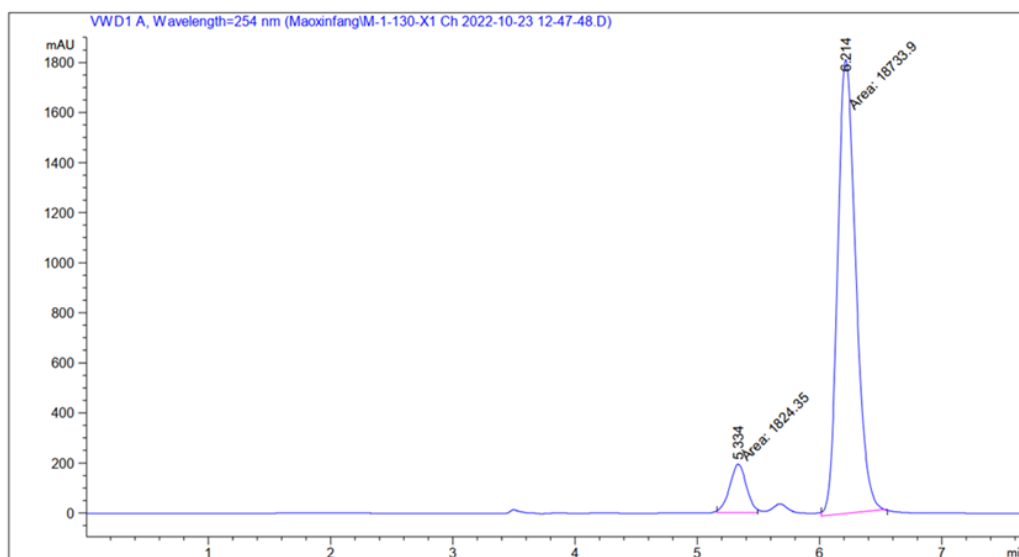

| Peak # | RetTime [min] | Type | Width [min] | Area [mAU*s] | Height [mAU] | Area %  |
|--------|---------------|------|-------------|--------------|--------------|---------|
| 1      | 5.334         | MM   | 0.1575      | 1824.34619   | 193.05765    | 8.8740  |
| 2      | 6.214         | MM   | 0.1723      | 1.87339e4    | 1812.40552   | 91.1260 |

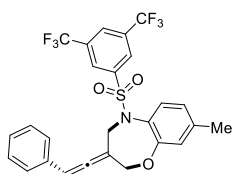

9e

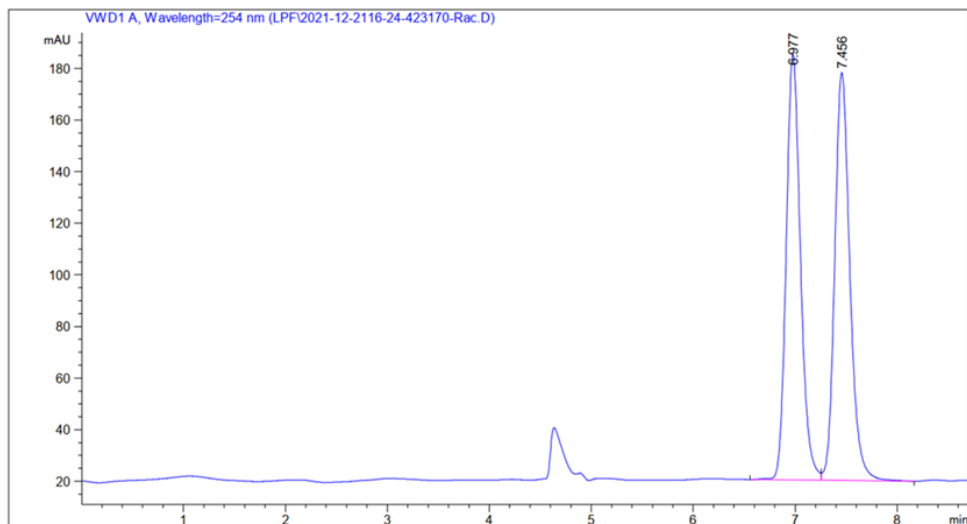

| Peak # | RetTime [min] | Type | Width [min] | Area [mAU*s] | Height [mAU] | Area %  |
|--------|---------------|------|-------------|--------------|--------------|---------|
| 1      | 6.977         | BV   | 0.1496      | 1607.15771   | 165.08972    | 49.6581 |
| 2      | 7.456         | VB   | 0.1583      | 1629.28650   | 158.07056    | 50.3419 |

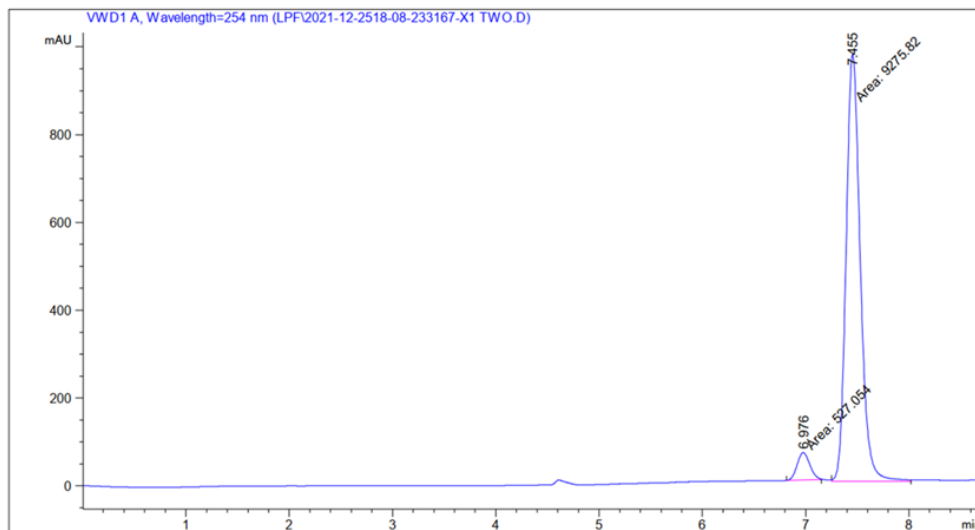

| Peak # | RetTime [min] | Type | Width [min] | Area [mAU*s] | Height [mAU] | Area %  |
|--------|---------------|------|-------------|--------------|--------------|---------|
| 1      | 6.976         | MM   | 0.1409      | 527.05396    | 62.35249     | 5.3765  |
| 2      | 7.455         | MM   | 0.1588      | 9275.82031   | 973.22699    | 94.6235 |

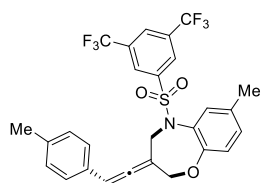

9f

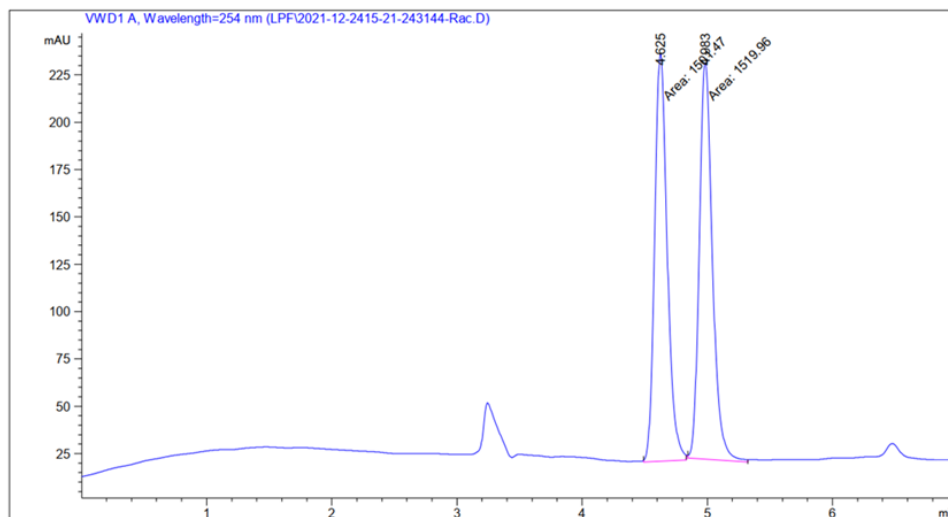

| Peak # | RetTime [min] | Type | Width [min] | Area [mAU*s] | Height [mAU] | Area %  |
|--------|---------------|------|-------------|--------------|--------------|---------|
| 1      | 4.625         | MM   | 0.1163      | 1501.47388   | 215.16077    | 49.6940 |
| 2      | 4.983         | MM   | 0.1211      | 1519.96387   | 209.26945    | 50.3060 |

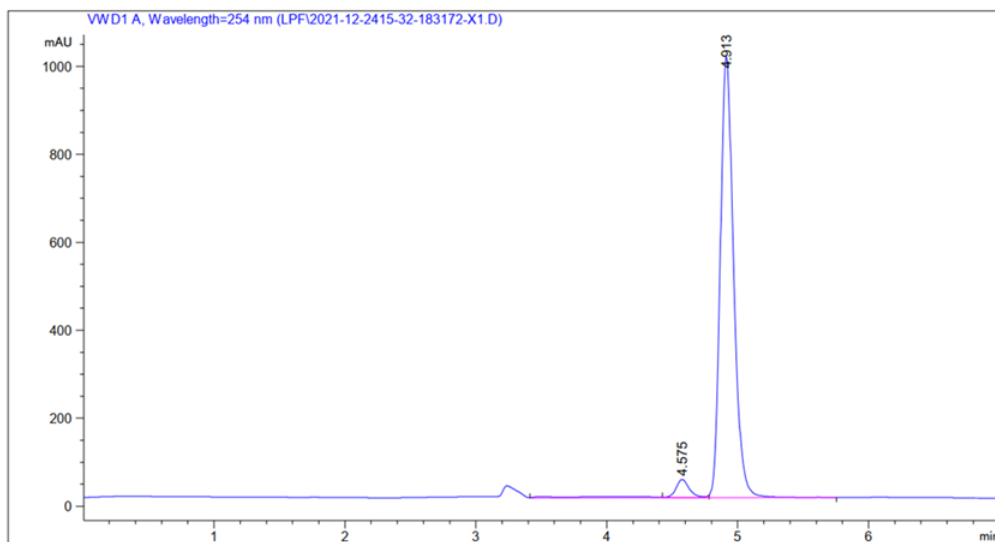

| Peak # | RetTime [min] | Type | Width [min] | Area [mAU*s] | Height [mAU] | Area %  |
|--------|---------------|------|-------------|--------------|--------------|---------|
| 1      | 4.575         | VV E | 0.1076      | 289.37299    | 40.89060     | 3.8588  |
| 2      | 4.913         | VV R | 0.1075      | 7209.61621   | 1002.60059   | 96.1412 |

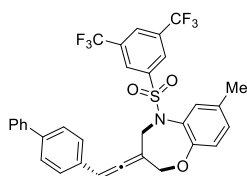

9g

Auto-Scaled Chromatogram

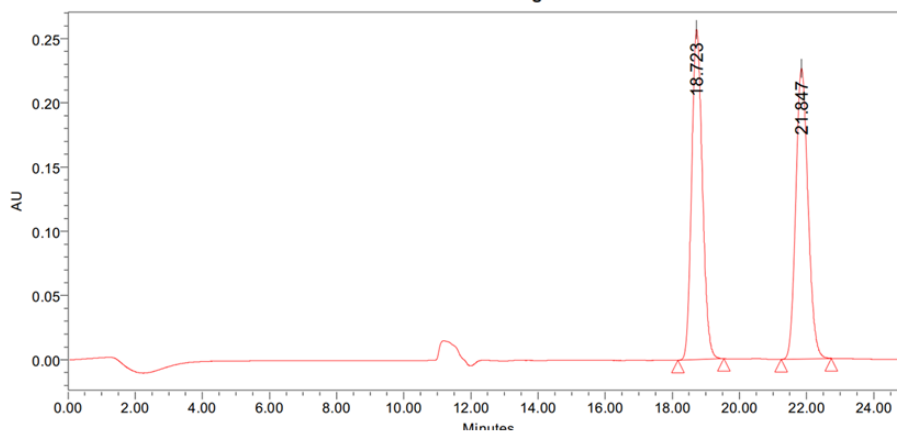

Peak Results

|   | Name | RT     | Area    | Height | % Area | Peak Width (sec) |
|---|------|--------|---------|--------|--------|------------------|
| 1 |      | 18.723 | 5722919 | 256949 | 50.04  | 30.00            |
| 2 |      | 21.847 | 5714336 | 226318 | 49.96  | 30.00            |

Auto-Scaled Chromatogram

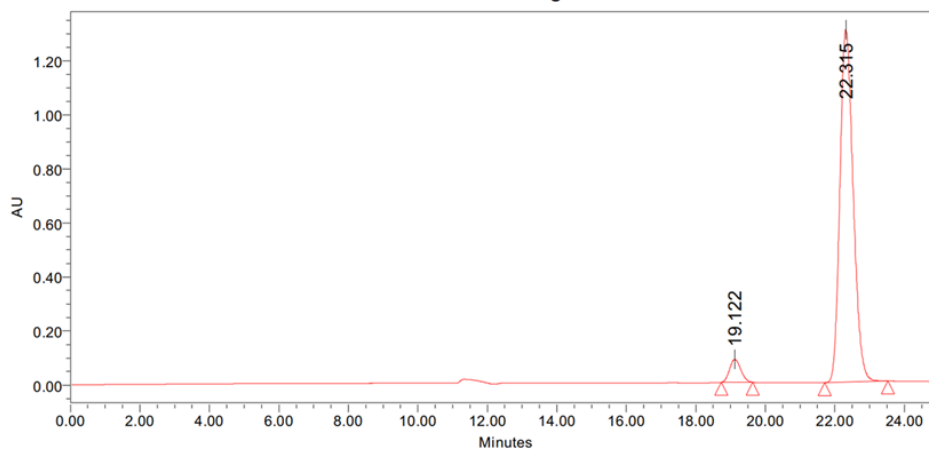

Peak Results

|   | Name | RT     | Area     | Height  | % Area | Peak Width (sec) |
|---|------|--------|----------|---------|--------|------------------|
| 1 |      | 19.122 | 1903027  | 84607   | 5.19   | 30.00            |
| 2 |      | 22.315 | 34742560 | 1303980 | 94.81  | 30.00            |

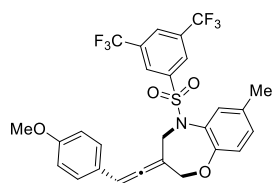

9h

Auto-Scaled Chromatogram

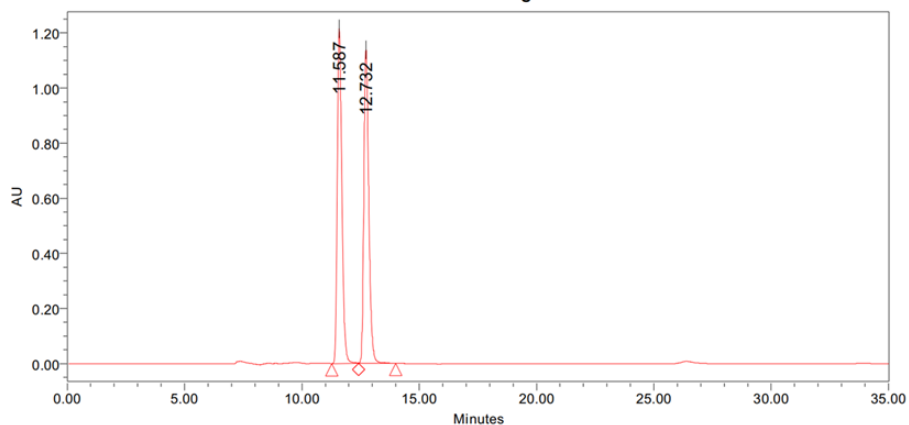

Peak Results

|   | Name | RT     | Area     | Height  | % Area | Peak Width (sec) |
|---|------|--------|----------|---------|--------|------------------|
| 1 |      | 11.587 | 16696297 | 1214710 | 49.86  | 30.00            |
| 2 |      | 12.732 | 16791455 | 1138425 | 50.14  | 30.00            |

Auto-Scaled Chromatogram

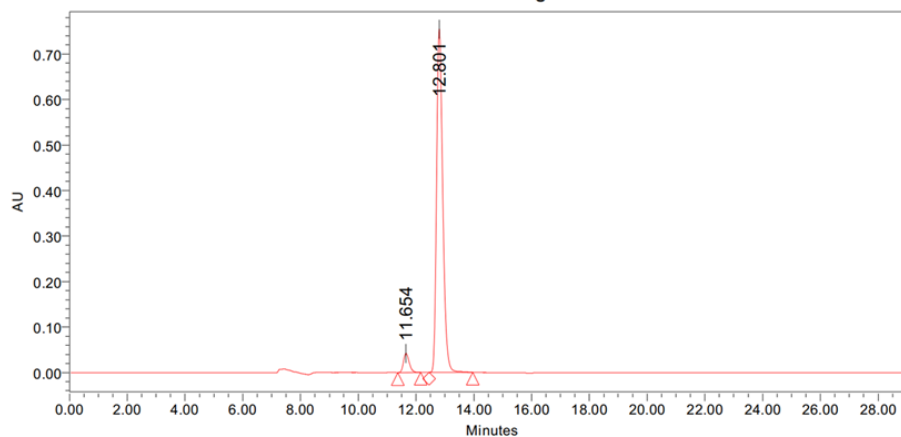

Peak Results

|   | Name | RT     | Area     | Height | % Area | Peak Width (sec) |
|---|------|--------|----------|--------|--------|------------------|
| 1 |      | 11.654 | 577413   | 42080  | 4.93   | 30.00            |
| 2 |      | 12.801 | 11136586 | 754047 | 95.07  | 30.00            |

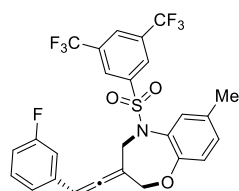

9i

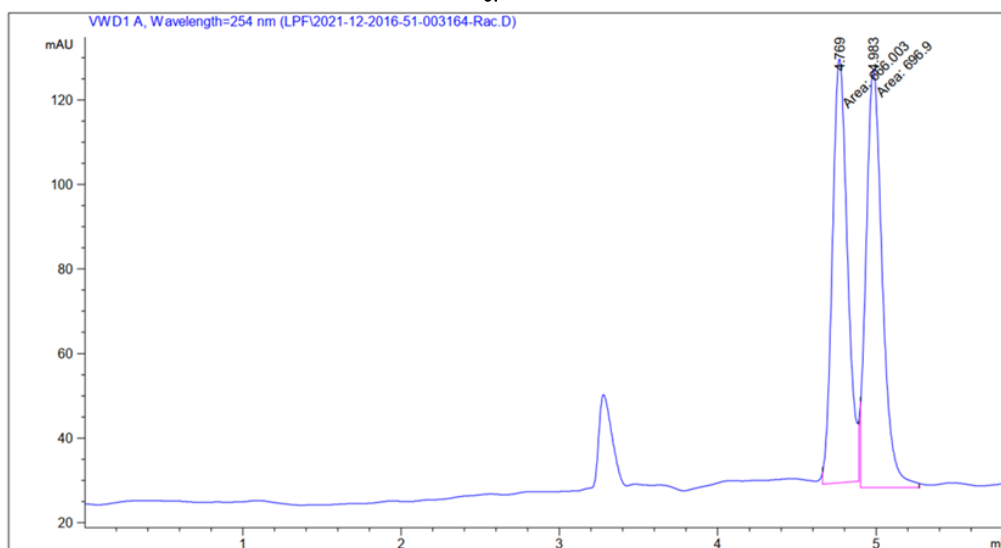

| Peak # | RetTime [min] | Type | Width [min] | Area [mAU*s] | Height [mAU] | Area %  |
|--------|---------------|------|-------------|--------------|--------------|---------|
| 1      | 4.769         | MM   | 0.1107      | 666.00250    | 100.28242    | 48.8665 |
| 2      | 4.983         | MM   | 0.1174      | 696.90002    | 98.92054     | 51.1335 |

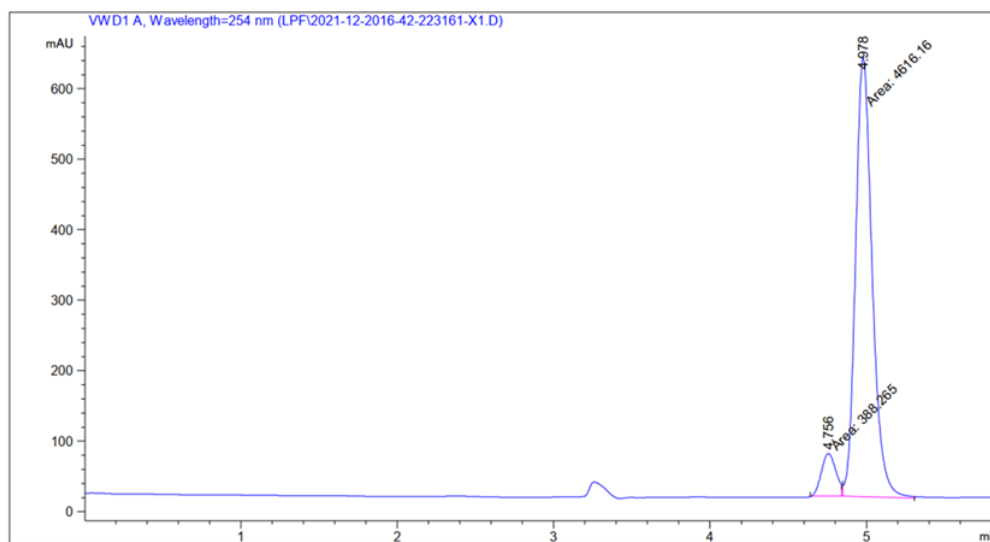

| Peak # | RetTime [min] | Type | Width [min] | Area [mAU*s] | Height [mAU] | Area %  |
|--------|---------------|------|-------------|--------------|--------------|---------|
| 1      | 4.756         | MM   | 0.1070      | 388.26517    | 60.49119     | 7.7584  |
| 2      | 4.978         | MM   | 0.1235      | 4616.16260   | 622.82001    | 92.2416 |

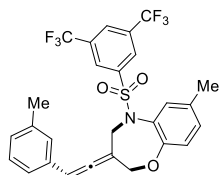

9j

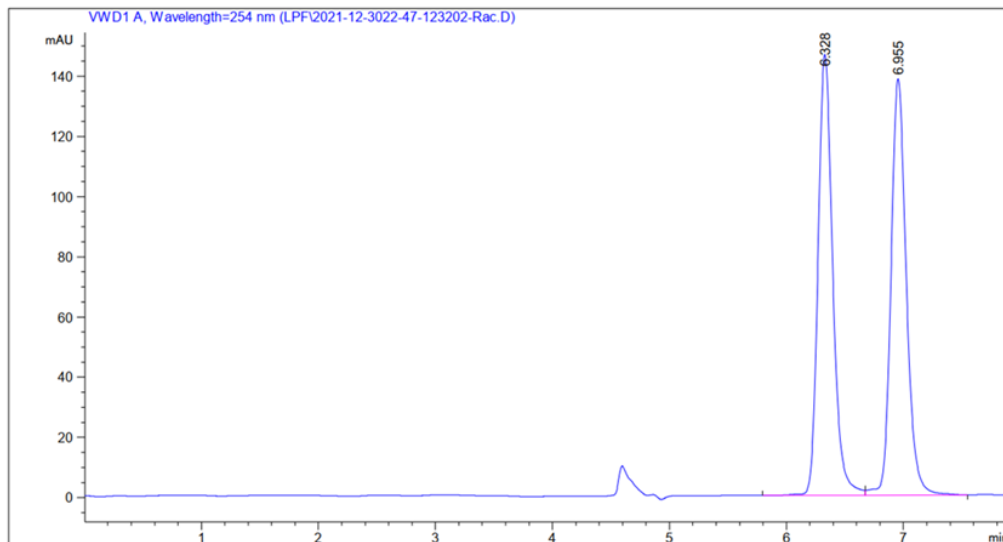

| Peak # | RetTime [min] | Type | Width [min] | Area [mAU*s] | Height [mAU] | Area %  |
|--------|---------------|------|-------------|--------------|--------------|---------|
| 1      | 6.328         | BV   | 0.1339      | 1278.91284   | 146.42386    | 50.3070 |
| 2      | 6.955         | VB   | 0.1406      | 1263.30139   | 138.25479    | 49.6930 |

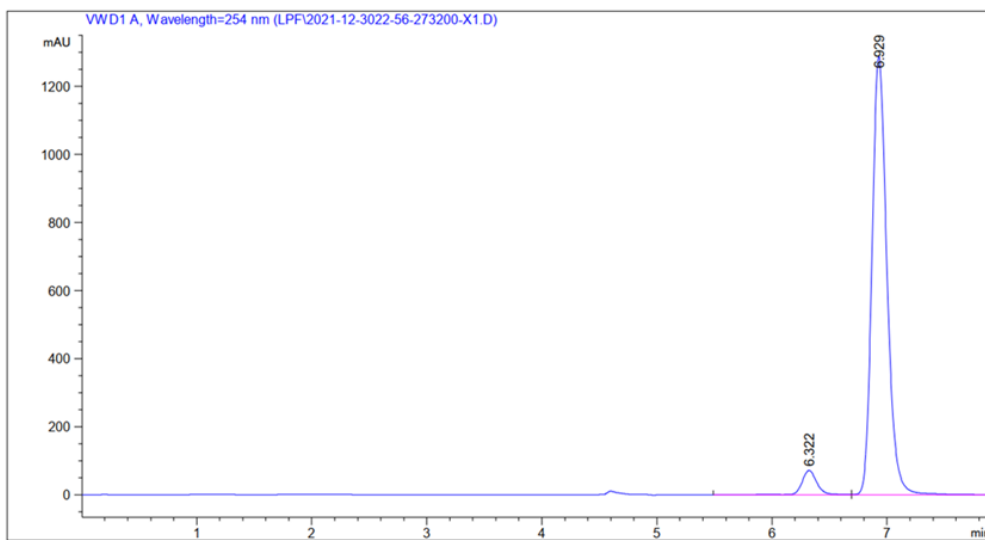

| Peak # | RetTime [min] | Type | Width [min] | Area [mAU*s] | Height [mAU] | Area %  |
|--------|---------------|------|-------------|--------------|--------------|---------|
| 1      | 6.322         | VV R | 0.1367      | 640.42316    | 71.34164     | 5.2404  |
| 2      | 6.929         | VB   | 0.1380      | 1.15805e4    | 1286.33838   | 94.7596 |

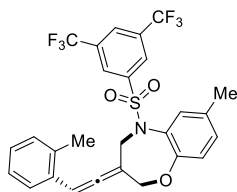

9k

Auto-Scaled Chromatogram

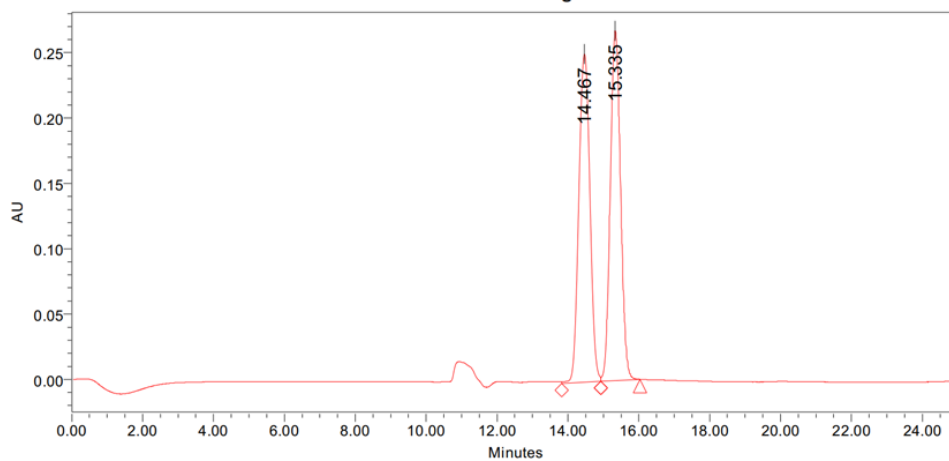

Peak Results

|   | Name | RT     | Area    | Height | % Area | Peak Width (sec) |
|---|------|--------|---------|--------|--------|------------------|
| 1 |      | 14.467 | 5427895 | 251067 | 50.10  | 30.00            |
| 2 |      | 15.335 | 5405150 | 267660 | 49.90  | 30.00            |

Auto-Scaled Chromatogram

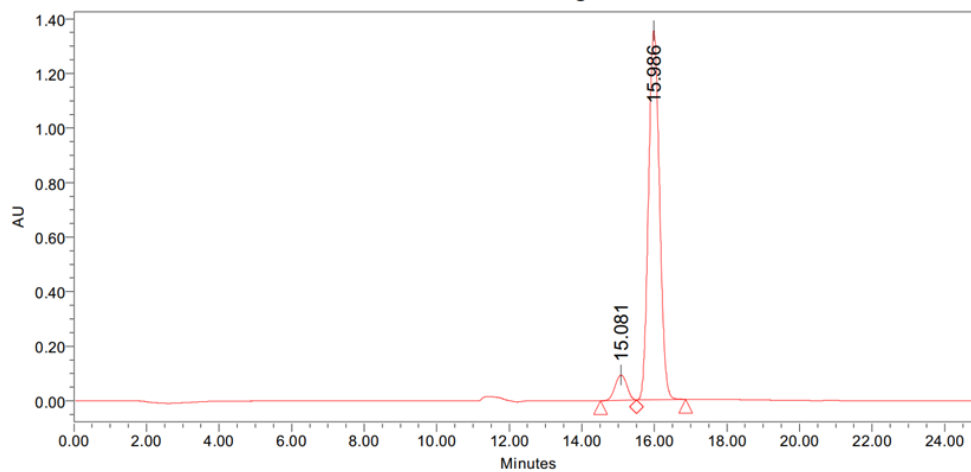

Peak Results

|   | Name | RT     | Area     | Height  | % Area | Peak Width (sec) |
|---|------|--------|----------|---------|--------|------------------|
| 1 |      | 15.081 | 2091211  | 92624   | 6.80   | 30.00            |
| 2 |      | 15.986 | 28672914 | 1353476 | 93.20  | 30.00            |

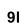

|   | Name | RT     | Area     | Height | % Area | Peak Width<br>(sec) |
|---|------|--------|----------|--------|--------|---------------------|
| 1 |      | 13.987 | 14983032 | 941678 | 49.92  | 30.00               |
| 2 |      | 15.655 | 15030228 | 859736 | 50.08  | 30.00               |

A chromatogram plot showing Absorbance Units (AU) on the y-axis (0.00 to 2.50) versus Minutes on the x-axis (0.00 to 20.00). The baseline is stable near 0.00 AU. Two peaks are identified: a small peak at 14.087 minutes and a large, sharp peak at 15.800 minutes reaching approximately 2.4 AU. Four red triangles are marked on the baseline at approximately 13.8, 14.5, 15.5, and 17.5 minutes.

| Retention Time (Minutes) | AU    |
|--------------------------|-------|
| 14.087                   | ~0.15 |
| 15.800                   | ~2.4  |

|   | Name | RT     | Area     | Height  | % Area | Peak Width<br>(sec) |
|---|------|--------|----------|---------|--------|---------------------|
| 1 |      | 14.087 | 2131628  | 143106  | 4.57   | 30.00               |
| 2 |      | 15.800 | 44464551 | 2531056 | 95.43  | 30.00               |

## HPLC spectra of 13

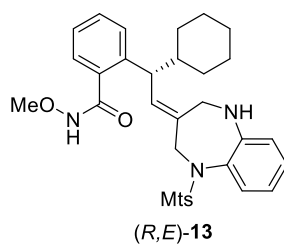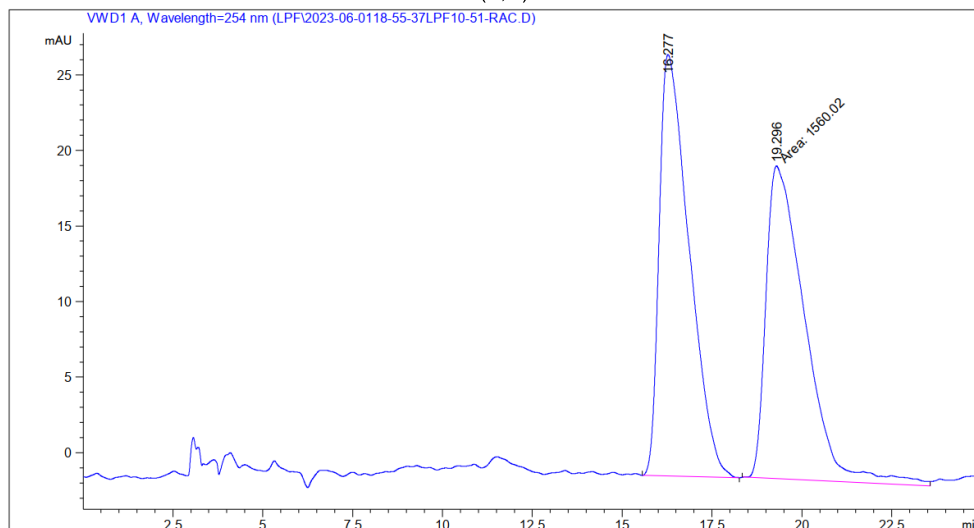

| Peak # | RetTime [min] | Type | Width [min] | Area [mAU*s] | Height [mAU] | Area %  |
|--------|---------------|------|-------------|--------------|--------------|---------|
| 1      | 16.277        | BB   | 0.8636      | 1612.15063   | 27.88209     | 50.8218 |
| 2      | 19.296        | MM   | 1.2573      | 1560.01599   | 20.67946     | 49.1782 |

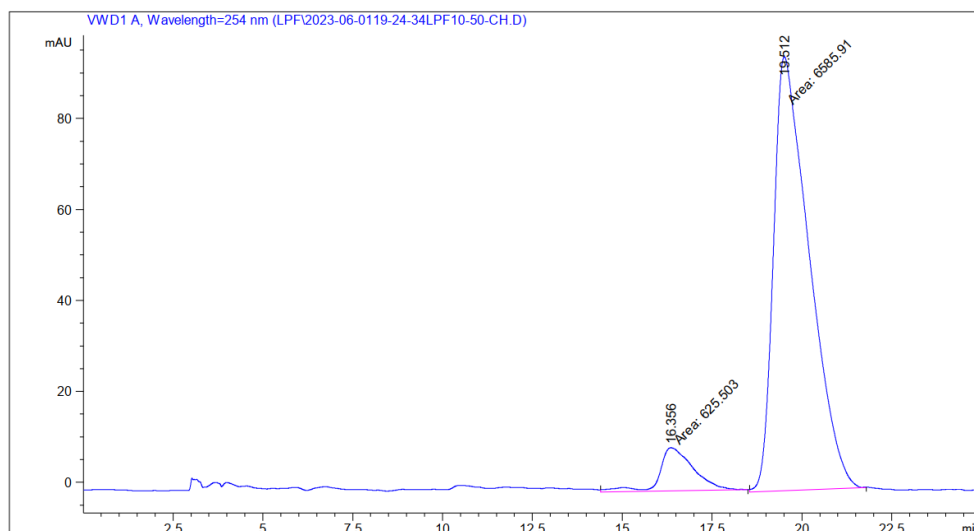

| Peak # | RetTime [min] | Type | Width [min] | Area [mAU*s] | Height [mAU] | Area %  |
|--------|---------------|------|-------------|--------------|--------------|---------|
| 1      | 16.356        | MM   | 1.0986      | 625.50269    | 9.48952      | 8.6738  |
| 2      | 19.512        | MM   | 1.1508      | 6585.91455   | 95.38136     | 91.3262 |

## HPLC spectra of 15

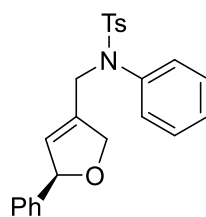

(R)-15

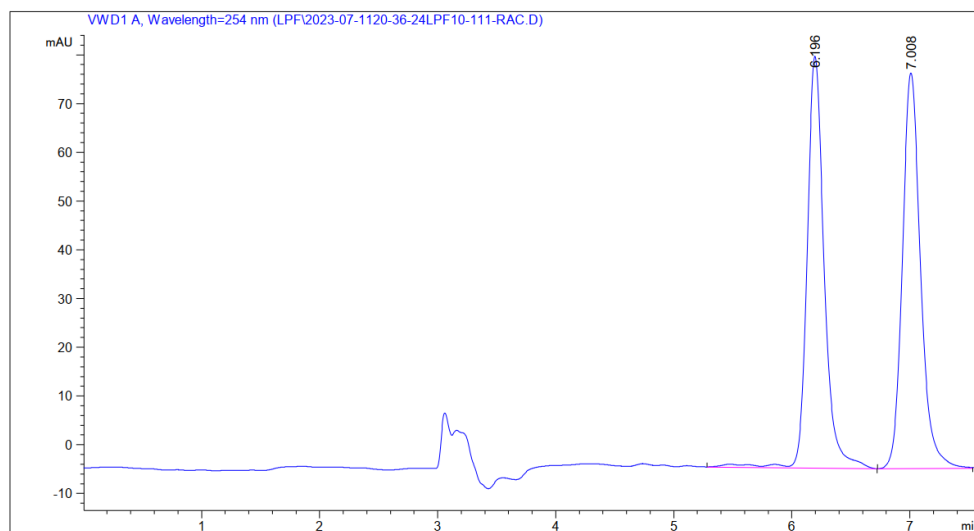

| Peak # | RetTime [min] | Type | Width [min] | Area [mAU*s] | Height [mAU] | Area %  |
|--------|---------------|------|-------------|--------------|--------------|---------|
| 1      | 6.196         | VB R | 0.1529      | 853.60492    | 84.47184     | 49.5763 |
| 2      | 7.008         | BV   | 0.1627      | 868.19446    | 81.20306     | 50.4237 |

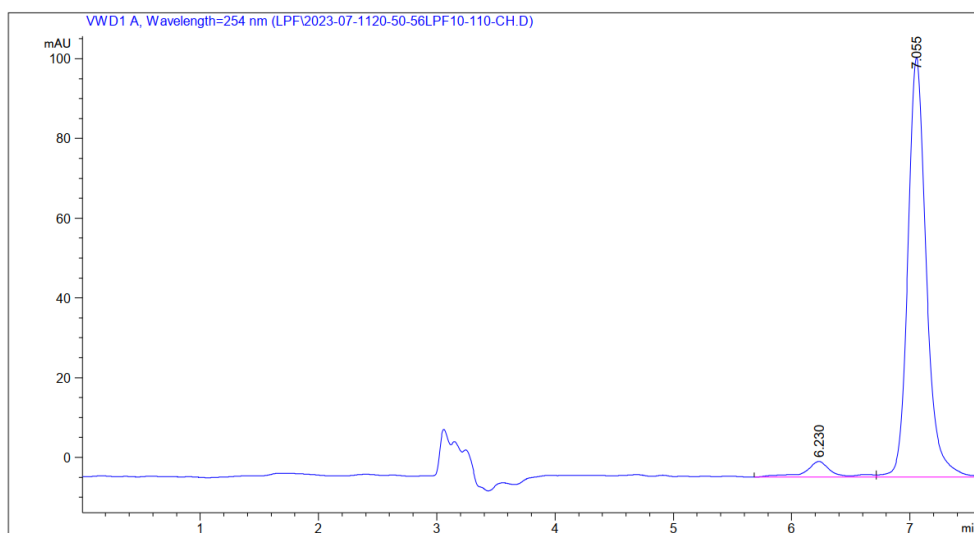

| Peak # | RetTime [min] | Type | Width [min] | Area [mAU*s] | Height [mAU] | Area %  |
|--------|---------------|------|-------------|--------------|--------------|---------|
| 1      | 6.230         | BV R | 0.2232      | 62.24430     | 3.90099      | 5.1968  |
| 2      | 7.055         | VV   | 0.1639      | 1135.50537   | 105.23139    | 94.8032 |
